# Supplementary material for: An aerobic eukaryotic parasite with functional mitochondria that likely lacks a mitochondrial genome
Source: PubMed Central journal article supplement — Sci Adv. 2019 Apr 24;5(4):eaav1110. doi: 10.1126/sciadv.aav1110 (PMC6482013; doi:10.1126/sciadv.aav1110), 2019-04-24
Supplement: aav1110_Data_file_S5.pdf [file aav1110_Data_file_S5.pdf]

## CONTENT:

### ASSEMBLY PROPERTIES – page 1

### DETECTION OF MITOCHONDRIAL SEQUENCES – page 66

---

#### Assembly properties

In order to provide properties of the assembly we mapped the paired-end and mate-pair data to the scaffolded contigs using *clc assembly cell* included tools *clc\_mapper* and *clc\_mapping\_info*.

--- paired-end data mapping results ---

#### General info:

```
Program name      clc_mapper
Program version   5.0.4.161845-201706141024
Program parameters -d Amoebophrya.scaffolds.fa -p fb ss 0 1000 -q -i pe_read_1.fq
pe_read_2.fq -o mapping_PE_data.cas -r ignore
```

#### Contig files:

```
Amoebophrya.scaffolds.fa [ 2351 / 87690817 ]
```

#### Read files:

```
pe_read_1.fq interleaved with pe_read_2.fq [ 170278898 / 15255592096 ] <paired>
```

#### Read info:

|                  |           |          |
|------------------|-----------|----------|
| Contigs          | 2351      |          |
| Reads            | 170278898 |          |
| Unmapped reads   | 56535279  | 33.20 %  |
| Mapped reads     | 113743619 | 66.80 %  |
| Multi hit reads  | 0         | 0.00 %   |
| Mapped as paired | 170278898 | 100.00 % |
| Paired           | 103842354 | 60.98 %  |
| Multi hit reads  | 0         | 0.00 %   |
| Unpaired         | 66436544  | 39.02 %  |
| Multi hit reads  | 0         | 0.00 %   |

#### Paired end info:

|                         |           |         |
|-------------------------|-----------|---------|
| Paired reads            | 103842354 | 60.98 % |
| Average distance        | 374.56    |         |
| 99.9 % of pairs between | 45 - 740  |         |
| 99.0 % of pairs between | 95 - 496  |         |
| 95.0 % of pairs between | 288 - 477 |         |
| Unpaired reads          | 66436544  | 39.02 % |
| Both seqs not matching  | 52798544  | 79.47 % |
| One seq not mathing     | 7473470   | 11.25 % |
| Both seqs matching      | 6164530   | 9.28 %  |
| Different contigs       | 5624588   | 91.24 % |
| Wrong directions        | 406034    | 6.59 %  |
| Too close               | 0         | 0.00 %  |
| Too far                 | 133908    | 2.17 %  |

#### Coverage info:

|                    |            |         |
|--------------------|------------|---------|
| Mapped nucleotides | 9978234683 | 65.41 % |
| Total sites        | 87690817   |         |
| Average coverage   | 113.80     |         |

## Contig info:

| Contig | Sites  | Reads  | Coverage |
|--------|--------|--------|----------|
| 1      | 536766 | 656960 | 108.20   |
| 2      | 333242 | 371572 | 98.85    |
| 3      | 232214 | 260403 | 99.20    |
| 4      | 215172 | 194829 | 78.54    |
| 5      | 173237 | 325142 | 163.34   |
| 6      | 323084 | 340456 | 92.76    |
| 7      | 161939 | 177226 | 96.57    |
| 8      | 166220 | 136487 | 70.64    |
| 9      | 268366 | 301334 | 99.55    |
| 10     | 324791 | 355671 | 96.91    |
| 11     | 188472 | 211928 | 98.55    |
| 12     | 153463 | 143123 | 80.79    |
| 13     | 317780 | 352727 | 98.06    |
| 14     | 111583 | 143464 | 114.74   |
| 15     | 219690 | 217663 | 86.69    |
| 16     | 139012 | 187563 | 119.13   |
| 17     | 126789 | 139531 | 97.38    |
| 18     | 175422 | 200392 | 100.61   |
| 19     | 328227 | 386504 | 104.87   |
| 20     | 145226 | 161278 | 97.38    |
| 21     | 276268 | 319499 | 101.03   |
| 22     | 114060 | 137400 | 107.10   |
| 23     | 127126 | 147279 | 102.51   |
| 24     | 130106 | 150519 | 102.61   |
| 25     | 93494  | 119590 | 114.62   |
| 26     | 318924 | 371798 | 103.09   |
| 27     | 141906 | 149545 | 92.59    |
| 28     | 98310  | 105644 | 94.87    |
| 29     | 159638 | 159946 | 87.02    |
| 30     | 148439 | 159745 | 93.99    |
| 31     | 175880 | 194366 | 97.63    |
| 32     | 406243 | 455501 | 98.72    |
| 33     | 85953  | 92267  | 93.92    |
| 34     | 147081 | 191677 | 116.61   |
| 35     | 146507 | 217444 | 130.41   |
| 36     | 175363 | 228678 | 112.25   |
| 37     | 365549 | 746403 | 180.31   |
| 38     | 254965 | 288592 | 99.63    |
| 39     | 248039 | 310487 | 111.21   |
| 40     | 124202 | 138628 | 98.72    |
| 41     | 93992  | 126730 | 118.27   |
| 42     | 202498 | 210491 | 91.40    |
| 43     | 248522 | 312696 | 111.54   |
| 44     | 86540  | 92932  | 94.27    |
| 45     | 78758  | 93817  | 105.91   |
| 46     | 102561 | 119439 | 103.28   |
| 47     | 133237 | 132698 | 87.00    |
| 48     | 127890 | 136004 | 93.92    |
| 49     | 163722 | 181146 | 97.29    |
| 50     | 396561 | 476925 | 106.60   |
| 51     | 134357 | 139508 | 91.36    |
| 52     | 182822 | 231691 | 112.91   |
| 53     | 213816 | 210861 | 85.84    |
| 54     | 276801 | 322295 | 103.12   |
| 55     | 74863  | 100740 | 113.22   |
| 56     | 183255 | 233177 | 111.84   |
| 57     | 192449 | 202066 | 92.38    |
| 58     | 129925 | 165640 | 112.57   |
| 59     | 133584 | 164337 | 109.13   |
| 60     | 168647 | 209669 | 110.45   |
| 61     | 182461 | 227620 | 110.51   |
| 62     | 346043 | 384818 | 98.57    |
| 63     | 265770 | 293598 | 97.84    |
| 64     | 96992  | 126058 | 114.44   |
| 65     | 73262  | 73217  | 87.63    |

|     |        |        |        |
|-----|--------|--------|--------|
| 66  | 90729  | 113297 | 111.76 |
| 67  | 127927 | 159639 | 111.27 |
| 68  | 105516 | 125344 | 104.41 |
| 69  | 150794 | 161769 | 94.32  |
| 70  | 174420 | 201044 | 102.65 |
| 71  | 67344  | 78258  | 103.12 |
| 72  | 145008 | 177529 | 108.15 |
| 73  | 90217  | 132467 | 128.47 |
| 74  | 160745 | 172267 | 94.10  |
| 75  | 178948 | 198529 | 97.41  |
| 76  | 93794  | 119449 | 112.88 |
| 77  | 196790 | 227898 | 101.75 |
| 78  | 100835 | 119521 | 105.36 |
| 79  | 139123 | 140499 | 89.12  |
| 80  | 92482  | 119588 | 114.45 |
| 81  | 99116  | 119062 | 106.24 |
| 82  | 108039 | 111611 | 89.11  |
| 83  | 158276 | 185499 | 102.96 |
| 84  | 177955 | 217015 | 108.30 |
| 85  | 69886  | 76904  | 96.49  |
| 86  | 297654 | 391413 | 115.74 |
| 87  | 126844 | 144320 | 99.65  |
| 88  | 63556  | 68385  | 94.54  |
| 89  | 63357  | 68153  | 94.40  |
| 90  | 117765 | 146685 | 111.45 |
| 91  | 81292  | 111175 | 120.83 |
| 92  | 71870  | 87669  | 107.91 |
| 93  | 187125 | 208454 | 97.95  |
| 94  | 62206  | 71175  | 100.21 |
| 95  | 291740 | 336809 | 102.05 |
| 96  | 124252 | 133120 | 94.32  |
| 97  | 117782 | 191815 | 142.31 |
| 98  | 83445  | 120455 | 127.48 |
| 99  | 105258 | 119581 | 98.10  |
| 100 | 100525 | 185616 | 169.76 |
| 101 | 61657  | 80890  | 115.55 |
| 102 | 76090  | 100378 | 116.93 |
| 103 | 82173  | 91207  | 97.21  |
| 104 | 255748 | 278958 | 95.66  |
| 105 | 61205  | 64396  | 92.63  |
| 106 | 175660 | 209096 | 104.95 |
| 107 | 91271  | 103835 | 100.60 |
| 108 | 106677 | 113567 | 93.96  |
| 109 | 114018 | 125521 | 97.48  |
| 110 | 186986 | 214965 | 101.51 |
| 111 | 97670  | 241743 | 221.45 |
| 112 | 93580  | 121629 | 111.83 |
| 113 | 210404 | 254369 | 106.59 |
| 114 | 123031 | 129923 | 93.10  |
| 115 | 99744  | 118510 | 105.14 |
| 116 | 59843  | 72636  | 108.40 |
| 117 | 59815  | 45880  | 66.33  |
| 118 | 162979 | 180280 | 97.82  |
| 119 | 65061  | 85821  | 114.51 |
| 120 | 174079 | 245097 | 125.09 |
| 121 | 62461  | 73100  | 101.73 |
| 122 | 120364 | 134088 | 97.42  |
| 123 | 93542  | 137439 | 130.55 |
| 124 | 60248  | 69506  | 101.61 |
| 125 | 328515 | 375337 | 100.37 |
| 126 | 137348 | 183840 | 119.89 |
| 127 | 81168  | 97475  | 105.91 |
| 128 | 77395  | 88590  | 100.62 |
| 129 | 127494 | 150072 | 104.21 |
| 130 | 72353  | 89113  | 109.73 |
| 131 | 62800  | 72550  | 102.39 |
| 132 | 58079  | 67356  | 102.22 |
| 133 | 58020  | 52568  | 77.99  |

|     |        |        |        |
|-----|--------|--------|--------|
| 134 | 57910  | 46536  | 69.70  |
| 135 | 75714  | 92129  | 107.74 |
| 136 | 99799  | 113850 | 100.69 |
| 137 | 177394 | 217024 | 108.98 |
| 138 | 98239  | 136085 | 121.54 |
| 139 | 112749 | 139934 | 110.35 |
| 140 | 129006 | 140919 | 95.62  |
| 141 | 286137 | 327215 | 100.15 |
| 142 | 321698 | 403514 | 110.90 |
| 143 | 79722  | 94312  | 105.22 |
| 144 | 71343  | 69735  | 85.03  |
| 145 | 56565  | 61748  | 95.75  |
| 146 | 193525 | 262313 | 119.05 |
| 147 | 177183 | 202515 | 101.57 |
| 148 | 56217  | 82727  | 112.97 |
| 149 | 266885 | 316791 | 104.77 |
| 150 | 176950 | 211148 | 104.36 |
| 151 | 179797 | 225039 | 110.92 |
| 152 | 116329 | 128771 | 97.47  |
| 153 | 121041 | 190717 | 120.88 |
| 154 | 114202 | 135985 | 105.72 |
| 155 | 192685 | 222421 | 101.44 |
| 156 | 107233 | 116846 | 96.61  |
| 157 | 65188  | 71856  | 97.07  |
| 158 | 56708  | 62556  | 97.11  |
| 159 | 118256 | 126628 | 94.90  |
| 160 | 165689 | 179363 | 94.99  |
| 161 | 168051 | 202983 | 106.73 |
| 162 | 74738  | 95187  | 112.05 |
| 163 | 70798  | 47870  | 56.97  |
| 164 | 74257  | 81007  | 96.15  |
| 165 | 110181 | 125444 | 99.52  |
| 166 | 148193 | 154858 | 91.03  |
| 167 | 53643  | 76262  | 125.29 |
| 168 | 123844 | 172761 | 108.42 |
| 169 | 85289  | 99471  | 99.33  |
| 170 | 143356 | 162741 | 100.24 |
| 171 | 85647  | 110877 | 114.34 |
| 172 | 70511  | 70437  | 87.91  |
| 173 | 72271  | 83875  | 102.21 |
| 174 | 56390  | 65857  | 103.98 |
| 175 | 97672  | 126569 | 114.38 |
| 176 | 65100  | 65083  | 87.71  |
| 177 | 52223  | 60357  | 102.68 |
| 178 | 52176  | 52737  | 88.58  |
| 179 | 82011  | 88175  | 94.52  |
| 180 | 124833 | 172424 | 120.57 |
| 181 | 144501 | 161168 | 98.48  |
| 182 | 63359  | 69188  | 96.19  |
| 183 | 116878 | 126824 | 95.83  |
| 184 | 51663  | 61447  | 105.64 |
| 185 | 51571  | 65179  | 112.98 |
| 186 | 133269 | 160951 | 106.87 |
| 187 | 157610 | 382020 | 214.27 |
| 188 | 109914 | 113466 | 90.70  |
| 189 | 201745 | 225921 | 99.18  |
| 190 | 97137  | 120947 | 111.05 |
| 191 | 139242 | 146650 | 92.41  |
| 192 | 54400  | 75601  | 122.89 |
| 193 | 88604  | 120139 | 121.64 |
| 194 | 118796 | 116115 | 85.61  |
| 195 | 50511  | 56973  | 97.82  |
| 196 | 112378 | 133696 | 105.46 |
| 197 | 258686 | 327819 | 111.39 |
| 198 | 50377  | 58674  | 103.25 |
| 199 | 137194 | 130955 | 82.99  |
| 200 | 142665 | 160911 | 99.44  |
| 201 | 73540  | 89707  | 108.12 |

|     |        |        |        |
|-----|--------|--------|--------|
| 202 | 50102  | 51577  | 90.57  |
| 203 | 123289 | 112705 | 79.74  |
| 204 | 53771  | 64738  | 106.73 |
| 205 | 57946  | 71355  | 109.01 |
| 206 | 54733  | 56766  | 91.53  |
| 207 | 102377 | 126443 | 109.60 |
| 208 | 141580 | 178089 | 111.31 |
| 209 | 97348  | 126103 | 115.44 |
| 210 | 62727  | 79679  | 112.24 |
| 211 | 211517 | 222124 | 91.46  |
| 212 | 115170 | 137302 | 105.56 |
| 213 | 91868  | 129236 | 121.61 |
| 214 | 51886  | 71043  | 121.44 |
| 215 | 171261 | 246937 | 125.79 |
| 216 | 68838  | 45111  | 54.65  |
| 217 | 51735  | 56112  | 95.26  |
| 218 | 99890  | 114882 | 100.24 |
| 219 | 49653  | 60161  | 108.14 |
| 220 | 62271  | 66737  | 94.55  |
| 221 | 47585  | 21559  | 34.70  |
| 222 | 154508 | 189063 | 108.46 |
| 223 | 139746 | 135505 | 83.86  |
| 224 | 63906  | 69808  | 96.27  |
| 225 | 137587 | 165780 | 105.30 |
| 226 | 127311 | 136387 | 94.58  |
| 227 | 86592  | 99237  | 101.64 |
| 228 | 211282 | 264968 | 110.64 |
| 229 | 140265 | 140140 | 88.11  |
| 230 | 65568  | 72303  | 96.45  |
| 231 | 196863 | 230192 | 103.27 |
| 232 | 329788 | 362068 | 96.45  |
| 233 | 46604  | 53463  | 102.12 |
| 234 | 119624 | 146144 | 107.26 |
| 235 | 54906  | 64921  | 104.19 |
| 236 | 50122  | 48819  | 84.40  |
| 237 | 78196  | 86464  | 96.74  |
| 238 | 101967 | 118912 | 103.29 |
| 239 | 115663 | 117587 | 89.37  |
| 240 | 46012  | 53526  | 103.16 |
| 241 | 150960 | 169201 | 99.02  |
| 242 | 100207 | 105549 | 92.85  |
| 243 | 76249  | 85770  | 99.53  |
| 244 | 49749  | 63629  | 107.70 |
| 245 | 55046  | 67395  | 108.61 |
| 246 | 137786 | 155955 | 99.60  |
| 247 | 75168  | 88198  | 103.93 |
| 248 | 131524 | 241326 | 160.24 |
| 249 | 88209  | 101128 | 100.85 |
| 250 | 151971 | 166110 | 96.21  |
| 251 | 124822 | 147699 | 104.70 |
| 252 | 121895 | 142012 | 103.23 |
| 253 | 172711 | 211315 | 108.47 |
| 254 | 85809  | 97378  | 99.61  |
| 255 | 58403  | 83618  | 124.91 |
| 256 | 53382  | 62886  | 103.88 |
| 257 | 209020 | 232163 | 98.03  |
| 258 | 83856  | 89860  | 94.53  |
| 259 | 113454 | 124324 | 97.01  |
| 260 | 68815  | 67395  | 86.26  |
| 261 | 70656  | 75012  | 93.73  |
| 262 | 57435  | 66846  | 100.64 |
| 263 | 67216  | 74670  | 98.18  |
| 264 | 124923 | 145791 | 102.75 |
| 265 | 91369  | 102305 | 99.28  |
| 266 | 44102  | 43781  | 86.91  |
| 267 | 83101  | 98885  | 104.62 |
| 268 | 148703 | 165626 | 98.02  |
| 269 | 43954  | 52483  | 104.14 |

|     |        |        |        |
|-----|--------|--------|--------|
| 270 | 318215 | 342522 | 95.05  |
| 271 | 100775 | 113782 | 100.08 |
| 272 | 59960  | 73733  | 109.38 |
| 273 | 98991  | 103200 | 91.68  |
| 274 | 103577 | 124943 | 105.78 |
| 275 | 172884 | 189199 | 96.32  |
| 276 | 43204  | 47035  | 97.07  |
| 277 | 42963  | 54231  | 112.20 |
| 278 | 42954  | 45055  | 92.71  |
| 279 | 188966 | 214214 | 99.54  |
| 280 | 84456  | 102993 | 108.44 |
| 281 | 64541  | 74440  | 101.26 |
| 282 | 42542  | 49787  | 103.64 |
| 283 | 82439  | 95466  | 103.05 |
| 284 | 108086 | 136742 | 113.00 |
| 285 | 44040  | 51711  | 100.83 |
| 286 | 126040 | 136171 | 94.60  |
| 287 | 63286  | 74916  | 104.31 |
| 288 | 129703 | 145378 | 98.51  |
| 289 | 72757  | 92992  | 112.55 |
| 290 | 56290  | 74605  | 115.02 |
| 291 | 117642 | 147325 | 110.98 |
| 292 | 178755 | 226108 | 112.71 |
| 293 | 45337  | 50755  | 98.26  |
| 294 | 44345  | 62795  | 125.97 |
| 295 | 174154 | 196852 | 99.52  |
| 296 | 46186  | 39585  | 73.57  |
| 297 | 41481  | 50679  | 108.14 |
| 298 | 51642  | 42324  | 71.19  |
| 299 | 134107 | 183286 | 121.88 |
| 300 | 80517  | 86994  | 95.75  |
| 301 | 45915  | 51021  | 96.18  |
| 302 | 69887  | 72413  | 90.91  |
| 303 | 122725 | 148982 | 107.58 |
| 304 | 72903  | 89297  | 109.24 |
| 305 | 46298  | 50846  | 96.27  |
| 306 | 65908  | 72943  | 97.91  |
| 307 | 151821 | 167513 | 97.33  |
| 308 | 117991 | 170248 | 128.46 |
| 309 | 133779 | 320734 | 212.39 |
| 310 | 41964  | 44015  | 92.12  |
| 311 | 61283  | 78627  | 114.01 |
| 312 | 76577  | 91300  | 106.14 |
| 313 | 48381  | 60727  | 111.83 |
| 314 | 40098  | 38819  | 85.13  |
| 315 | 53489  | 58566  | 96.76  |
| 316 | 71093  | 98226  | 122.95 |
| 317 | 40035  | 45597  | 100.62 |
| 318 | 39976  | 45035  | 99.59  |
| 319 | 49637  | 57375  | 102.27 |
| 320 | 67401  | 79152  | 103.47 |
| 321 | 44078  | 73425  | 144.85 |
| 322 | 101132 | 116147 | 101.40 |
| 323 | 42605  | 51221  | 105.04 |
| 324 | 56801  | 70912  | 112.16 |
| 325 | 86129  | 112111 | 115.27 |
| 326 | 39384  | 51882  | 117.95 |
| 327 | 44312  | 52562  | 104.75 |
| 328 | 62370  | 90819  | 129.08 |
| 329 | 74272  | 67334  | 79.23  |
| 330 | 164407 | 179343 | 96.00  |
| 331 | 57239  | 52460  | 76.55  |
| 332 | 216320 | 242850 | 99.27  |
| 333 | 80337  | 77291  | 83.80  |
| 334 | 38960  | 36179  | 81.44  |
| 335 | 173153 | 192757 | 98.13  |
| 336 | 82212  | 200025 | 213.59 |
| 337 | 88936  | 113718 | 111.59 |

|     |        |        |        |
|-----|--------|--------|--------|
| 338 | 83644  | 151645 | 162.15 |
| 339 | 69998  | 90006  | 114.15 |
| 340 | 72647  | 94318  | 115.56 |
| 341 | 99001  | 94621  | 82.85  |
| 342 | 38507  | 36602  | 83.19  |
| 343 | 100275 | 103864 | 90.94  |
| 344 | 225593 | 272380 | 107.12 |
| 345 | 82633  | 100621 | 106.61 |
| 346 | 127236 | 161470 | 113.06 |
| 347 | 41380  | 41838  | 89.23  |
| 348 | 81832  | 121630 | 127.78 |
| 349 | 110855 | 130292 | 102.92 |
| 350 | 67308  | 78281  | 103.38 |
| 351 | 37712  | 46402  | 109.03 |
| 352 | 83672  | 107643 | 113.13 |
| 353 | 144676 | 149963 | 89.93  |
| 354 | 78059  | 83286  | 94.43  |
| 355 | 44799  | 42817  | 83.84  |
| 356 | 112687 | 154683 | 122.50 |
| 357 | 187470 | 232567 | 109.36 |
| 358 | 44497  | 69066  | 138.71 |
| 359 | 51083  | 62552  | 108.66 |
| 360 | 46768  | 52861  | 97.32  |
| 361 | 68819  | 62127  | 77.69  |
| 362 | 45689  | 51861  | 98.06  |
| 363 | 52746  | 63836  | 106.85 |
| 364 | 82618  | 90083  | 95.91  |
| 365 | 114418 | 128857 | 99.85  |
| 366 | 37022  | 56991  | 134.45 |
| 367 | 64089  | 70792  | 95.93  |
| 368 | 40498  | 52300  | 115.82 |
| 369 | 69696  | 80882  | 102.02 |
| 370 | 95533  | 95721  | 87.66  |
| 371 | 133986 | 148148 | 96.91  |
| 372 | 77937  | 88899  | 99.16  |
| 373 | 40859  | 44886  | 96.94  |
| 374 | 80959  | 100022 | 110.07 |
| 375 | 82457  | 96768  | 104.01 |
| 376 | 36478  | 33747  | 81.08  |
| 377 | 105202 | 130981 | 111.22 |
| 378 | 67587  | 71643  | 93.63  |
| 379 | 176433 | 233966 | 116.99 |
| 380 | 108845 | 135174 | 109.25 |
| 381 | 49028  | 55811  | 99.94  |
| 382 | 81605  | 88684  | 96.79  |
| 383 | 55021  | 59443  | 94.98  |
| 384 | 106921 | 138307 | 114.72 |
| 385 | 42973  | 55060  | 113.51 |
| 386 | 43476  | 45779  | 90.69  |
| 387 | 63759  | 80157  | 110.55 |
| 388 | 36082  | 38546  | 94.02  |
| 389 | 54038  | 60947  | 99.19  |
| 390 | 53341  | 72737  | 120.06 |
| 391 | 85227  | 98278  | 101.62 |
| 392 | 77618  | 96471  | 110.31 |
| 393 | 160693 | 167125 | 91.21  |
| 394 | 69156  | 72519  | 91.76  |
| 395 | 35395  | 40606  | 94.95  |
| 396 | 35377  | 35748  | 88.96  |
| 397 | 36638  | 47244  | 115.70 |
| 398 | 85464  | 102637 | 104.76 |
| 399 | 169219 | 202824 | 106.27 |
| 400 | 65647  | 73598  | 97.50  |
| 401 | 177949 | 220057 | 109.63 |
| 402 | 41991  | 52790  | 107.27 |
| 403 | 99656  | 123891 | 110.44 |
| 404 | 162428 | 190111 | 102.73 |
| 405 | 59717  | 60318  | 88.53  |

|     |        |        |        |
|-----|--------|--------|--------|
| 406 | 169324 | 225985 | 116.77 |
| 407 | 54454  | 53972  | 86.10  |
| 408 | 47307  | 49998  | 93.35  |
| 409 | 63173  | 73352  | 103.31 |
| 410 | 48605  | 51395  | 92.01  |
| 411 | 56283  | 74465  | 117.77 |
| 412 | 34679  | 27208  | 67.15  |
| 413 | 43205  | 50127  | 103.04 |
| 414 | 45271  | 53319  | 105.12 |
| 415 | 109598 | 126094 | 101.83 |
| 416 | 56894  | 69185  | 107.06 |
| 417 | 34068  | 40945  | 106.40 |
| 418 | 40331  | 49138  | 107.33 |
| 419 | 125672 | 146063 | 102.45 |
| 420 | 72255  | 86622  | 105.57 |
| 421 | 79089  | 90759  | 101.76 |
| 422 | 53665  | 83076  | 132.22 |
| 423 | 33804  | 41328  | 107.95 |
| 424 | 83383  | 98903  | 104.70 |
| 425 | 126078 | 162397 | 114.96 |
| 426 | 83970  | 90781  | 95.70  |
| 427 | 33700  | 33320  | 84.00  |
| 428 | 65844  | 73768  | 99.09  |
| 429 | 63753  | 79900  | 111.27 |
| 430 | 52786  | 62857  | 106.36 |
| 431 | 70437  | 70873  | 86.65  |
| 432 | 50892  | 70785  | 122.84 |
| 433 | 76787  | 105362 | 121.83 |
| 434 | 33133  | 42518  | 114.35 |
| 435 | 244044 | 291568 | 105.51 |
| 436 | 101144 | 130836 | 114.97 |
| 437 | 66223  | 80215  | 105.82 |
| 438 | 32963  | 35096  | 93.50  |
| 439 | 32954  | 34288  | 90.70  |
| 440 | 36101  | 42879  | 101.62 |
| 441 | 86961  | 87361  | 88.62  |
| 442 | 100763 | 132460 | 116.52 |
| 443 | 72677  | 97249  | 111.85 |
| 444 | 32711  | 34606  | 93.44  |
| 445 | 230577 | 284978 | 108.80 |
| 446 | 73411  | 92305  | 110.66 |
| 447 | 32685  | 34613  | 90.43  |
| 448 | 86854  | 107419 | 109.67 |
| 449 | 56099  | 76883  | 121.06 |
| 450 | 37577  | 67270  | 157.34 |
| 451 | 32514  | 88112  | 239.13 |
| 452 | 96599  | 107042 | 97.75  |
| 453 | 55569  | 66737  | 106.52 |
| 454 | 82611  | 93968  | 99.72  |
| 455 | 71709  | 80762  | 98.62  |
| 456 | 44428  | 54679  | 109.08 |
| 457 | 252597 | 315158 | 110.96 |
| 458 | 67511  | 94217  | 117.50 |
| 459 | 38059  | 36749  | 84.95  |
| 460 | 44403  | 37913  | 73.18  |
| 461 | 53176  | 48813  | 79.47  |
| 462 | 52775  | 58161  | 95.81  |
| 463 | 77014  | 92036  | 104.42 |
| 464 | 35530  | 47788  | 118.55 |
| 465 | 35079  | 45129  | 114.53 |
| 466 | 83470  | 92604  | 96.84  |
| 467 | 84959  | 99553  | 102.81 |
| 468 | 33099  | 35867  | 95.10  |
| 469 | 132717 | 147649 | 95.85  |
| 470 | 85034  | 108917 | 113.20 |
| 471 | 44190  | 65342  | 131.59 |
| 472 | 118023 | 167722 | 125.06 |
| 473 | 35293  | 46222  | 116.33 |



|     |        |        |        |
|-----|--------|--------|--------|
| 474 | 58151  | 59236  | 89.37  |
| 475 | 45566  | 64725  | 121.51 |
| 476 | 31337  | 29661  | 83.11  |
| 477 | 75465  | 82034  | 95.51  |
| 478 | 41096  | 46967  | 101.31 |
| 479 | 76086  | 112348 | 131.19 |
| 480 | 122444 | 147318 | 106.15 |
| 481 | 83544  | 87954  | 92.37  |
| 482 | 31098  | 39164  | 111.78 |
| 483 | 31032  | 35392  | 100.18 |
| 484 | 96594  | 112646 | 102.07 |
| 485 | 95407  | 98649  | 91.00  |
| 486 | 48345  | 67240  | 120.53 |
| 487 | 38465  | 40925  | 93.03  |
| 488 | 72203  | 91987  | 111.56 |
| 489 | 34732  | 42314  | 105.41 |
| 490 | 54455  | 55437  | 89.60  |
| 491 | 30459  | 48021  | 139.55 |
| 492 | 30456  | 35735  | 104.68 |
| 493 | 35878  | 52048  | 128.20 |
| 494 | 102492 | 125146 | 105.40 |
| 495 | 45396  | 53068  | 102.94 |
| 496 | 53610  | 73951  | 120.71 |
| 497 | 55468  | 62377  | 98.49  |
| 498 | 49455  | 50824  | 90.45  |
| 499 | 109586 | 125827 | 101.76 |
| 500 | 68315  | 74781  | 95.90  |
| 501 | 34906  | 39709  | 98.07  |
| 502 | 64811  | 80503  | 110.65 |
| 503 | 29928  | 46501  | 138.28 |
| 504 | 43545  | 43766  | 87.50  |
| 505 | 29827  | 29234  | 85.50  |
| 506 | 55977  | 67233  | 106.11 |
| 507 | 67207  | 90309  | 118.87 |
| 508 | 29781  | 40660  | 122.64 |
| 509 | 46433  | 55681  | 105.22 |
| 510 | 39984  | 55780  | 124.82 |
| 511 | 47340  | 51673  | 95.45  |
| 512 | 62467  | 73029  | 102.93 |
| 513 | 94321  | 114907 | 108.75 |
| 514 | 69021  | 80094  | 101.69 |
| 515 | 72553  | 76648  | 91.46  |
| 516 | 41218  | 33939  | 70.76  |
| 517 | 38053  | 34499  | 77.82  |
| 518 | 61688  | 83692  | 120.42 |
| 519 | 58929  | 55999  | 81.92  |
| 520 | 31744  | 39492  | 110.37 |
| 521 | 62780  | 85394  | 121.44 |
| 522 | 63568  | 74534  | 103.39 |
| 523 | 29352  | 35887  | 109.31 |
| 524 | 103800 | 135507 | 113.48 |
| 525 | 97528  | 113915 | 101.83 |
| 526 | 29226  | 29937  | 90.45  |
| 527 | 80786  | 96537  | 105.61 |
| 528 | 48858  | 64564  | 117.53 |
| 529 | 42178  | 57076  | 111.85 |
| 530 | 67295  | 74843  | 96.63  |
| 531 | 38666  | 35569  | 79.21  |
| 532 | 66833  | 75679  | 100.74 |
| 533 | 29059  | 36018  | 109.49 |
| 534 | 35869  | 38620  | 94.97  |
| 535 | 53830  | 67756  | 109.97 |
| 536 | 90583  | 110989 | 106.73 |
| 537 | 28937  | 29239  | 88.29  |
| 538 | 57359  | 70248  | 107.78 |
| 539 | 37127  | 36760  | 86.48  |
| 540 | 28801  | 39001  | 119.05 |
| 541 | 55488  | 70938  | 113.76 |

|     |        |        |        |
|-----|--------|--------|--------|
| 542 | 49537  | 54632  | 97.36  |
| 543 | 28719  | 32226  | 98.97  |
| 544 | 57684  | 53984  | 81.09  |
| 545 | 50549  | 62358  | 107.57 |
| 546 | 34937  | 48146  | 123.55 |
| 547 | 69723  | 93050  | 120.00 |
| 548 | 86943  | 99271  | 98.18  |
| 549 | 28561  | 30591  | 93.52  |
| 550 | 34155  | 42061  | 109.55 |
| 551 | 35000  | 42690  | 107.03 |
| 552 | 44322  | 45622  | 89.86  |
| 553 | 50590  | 61819  | 104.49 |
| 554 | 40286  | 44088  | 96.64  |
| 555 | 38733  | 63557  | 130.81 |
| 556 | 63685  | 74382  | 101.09 |
| 557 | 59060  | 54699  | 78.85  |
| 558 | 28162  | 38890  | 123.87 |
| 559 | 87827  | 105766 | 104.53 |
| 560 | 55335  | 78862  | 122.87 |
| 561 | 27853  | 32821  | 103.89 |
| 562 | 48266  | 56986  | 105.52 |
| 563 | 27708  | 30533  | 93.87  |
| 564 | 27704  | 48670  | 155.35 |
| 565 | 31752  | 77945  | 211.00 |
| 566 | 27695  | 35582  | 115.10 |
| 567 | 41583  | 82984  | 169.81 |
| 568 | 61435  | 79401  | 112.72 |
| 569 | 49424  | 60022  | 106.12 |
| 570 | 31449  | 46447  | 132.41 |
| 571 | 71780  | 94371  | 113.06 |
| 572 | 27508  | 40991  | 133.04 |
| 573 | 40744  | 49195  | 105.72 |
| 574 | 43071  | 49211  | 100.40 |
| 575 | 27427  | 29762  | 95.52  |
| 576 | 64249  | 74414  | 102.21 |
| 577 | 59568  | 75399  | 109.51 |
| 578 | 80588  | 92317  | 101.58 |
| 579 | 55155  | 66566  | 106.27 |
| 580 | 47900  | 52292  | 95.40  |
| 581 | 27269  | 30013  | 97.90  |
| 582 | 42609  | 50393  | 105.78 |
| 583 | 31452  | 34960  | 97.03  |
| 584 | 60886  | 75004  | 108.31 |
| 585 | 52650  | 60103  | 101.21 |
| 586 | 27119  | 36352  | 118.84 |
| 587 | 72883  | 92161  | 108.57 |
| 588 | 27065  | 31998  | 105.13 |
| 589 | 38387  | 46087  | 106.35 |
| 590 | 41860  | 79843  | 161.94 |
| 591 | 78458  | 87611  | 98.55  |
| 592 | 69280  | 110865 | 141.37 |
| 593 | 107412 | 125502 | 103.62 |
| 594 | 152607 | 177033 | 100.77 |
| 595 | 61674  | 82410  | 119.42 |
| 596 | 26854  | 29667  | 97.06  |
| 597 | 26830  | 33612  | 109.45 |
| 598 | 57919  | 70340  | 106.50 |
| 599 | 70638  | 79468  | 98.08  |
| 600 | 38815  | 39641  | 88.88  |
| 601 | 67620  | 76244  | 99.16  |
| 602 | 26733  | 31719  | 105.00 |
| 603 | 26698  | 36130  | 116.12 |
| 604 | 26679  | 30192  | 99.50  |
| 605 | 74591  | 86004  | 99.95  |
| 606 | 30545  | 47081  | 134.67 |
| 607 | 35783  | 56268  | 139.10 |
| 608 | 34641  | 45336  | 117.02 |
| 609 | 76271  | 89337  | 104.25 |

|     |        |        |        |
|-----|--------|--------|--------|
| 610 | 26385  | 31801  | 107.51 |
| 611 | 90191  | 107029 | 103.53 |
| 612 | 36741  | 37554  | 89.86  |
| 613 | 26292  | 27329  | 91.89  |
| 614 | 125039 | 137348 | 96.81  |
| 615 | 46851  | 216100 | 436.42 |
| 616 | 36061  | 42568  | 102.34 |
| 617 | 30165  | 38311  | 112.68 |
| 618 | 26139  | 31164  | 105.57 |
| 619 | 92742  | 106851 | 102.18 |
| 620 | 45122  | 52846  | 103.43 |
| 621 | 115829 | 140338 | 107.59 |
| 622 | 81220  | 107010 | 113.84 |
| 623 | 47623  | 55706  | 103.73 |
| 624 | 26001  | 32896  | 110.73 |
| 625 | 84540  | 110006 | 113.12 |
| 626 | 31342  | 63802  | 174.66 |
| 627 | 37615  | 35601  | 82.15  |
| 628 | 35810  | 50849  | 124.91 |
| 629 | 57999  | 73786  | 105.89 |
| 630 | 25862  | 35530  | 123.26 |
| 631 | 25813  | 31298  | 107.46 |
| 632 | 35339  | 28217  | 69.07  |
| 633 | 88638  | 97004  | 95.81  |
| 634 | 36778  | 48237  | 113.99 |
| 635 | 25706  | 28825  | 99.21  |
| 636 | 31101  | 37861  | 105.35 |
| 637 | 59115  | 72531  | 108.51 |
| 638 | 25536  | 37248  | 128.56 |
| 639 | 71972  | 90601  | 112.27 |
| 640 | 42057  | 50556  | 106.44 |
| 641 | 49622  | 63605  | 113.56 |
| 642 | 46244  | 50603  | 94.98  |
| 643 | 25462  | 37805  | 130.14 |
| 644 | 41962  | 47050  | 99.89  |
| 645 | 82392  | 98517  | 105.12 |
| 646 | 75430  | 113417 | 132.51 |
| 647 | 27816  | 36582  | 115.11 |
| 648 | 25242  | 27585  | 97.11  |
| 649 | 74836  | 79923  | 93.70  |
| 650 | 50379  | 69733  | 117.49 |
| 651 | 125823 | 132649 | 92.65  |
| 652 | 38945  | 51683  | 115.73 |
| 653 | 107907 | 120345 | 98.05  |
| 654 | 25099  | 39705  | 140.88 |
| 655 | 59823  | 69976  | 102.67 |
| 656 | 37018  | 47689  | 114.96 |
| 657 | 86171  | 98200  | 100.42 |
| 658 | 24914  | 26447  | 90.25  |
| 659 | 102028 | 128320 | 111.50 |
| 660 | 86658  | 97604  | 98.67  |
| 661 | 24863  | 32085  | 114.23 |
| 662 | 182458 | 231477 | 113.22 |
| 663 | 60369  | 77169  | 112.69 |
| 664 | 33944  | 36930  | 95.34  |
| 665 | 24807  | 26537  | 92.02  |
| 666 | 64062  | 71579  | 98.41  |
| 667 | 83031  | 92265  | 98.59  |
| 668 | 32315  | 32464  | 86.75  |
| 669 | 114507 | 126962 | 95.82  |
| 670 | 33936  | 42574  | 111.79 |
| 671 | 29212  | 33967  | 101.61 |
| 672 | 40825  | 48008  | 104.33 |
| 673 | 47551  | 58538  | 109.35 |
| 674 | 24424  | 26691  | 95.56  |
| 675 | 42427  | 56713  | 113.60 |
| 676 | 58854  | 57635  | 85.70  |
| 677 | 68345  | 72806  | 94.40  |

|     |        |        |        |
|-----|--------|--------|--------|
| 678 | 116201 | 139927 | 106.60 |
| 679 | 90141  | 115222 | 112.73 |
| 680 | 28235  | 28124  | 87.31  |
| 681 | 24247  | 28287  | 98.27  |
| 682 | 59684  | 100386 | 148.83 |
| 683 | 70261  | 83771  | 105.20 |
| 684 | 25744  | 34195  | 118.49 |
| 685 | 46609  | 56765  | 108.49 |
| 686 | 71661  | 97019  | 119.29 |
| 687 | 29445  | 34469  | 103.11 |
| 688 | 118870 | 114911 | 84.36  |
| 689 | 23959  | 42857  | 158.58 |
| 690 | 27297  | 30067  | 96.94  |
| 691 | 60973  | 64187  | 93.10  |
| 692 | 37639  | 44177  | 103.16 |
| 693 | 89831  | 105997 | 104.26 |
| 694 | 117475 | 127007 | 95.02  |
| 695 | 41457  | 73355  | 154.21 |
| 696 | 68572  | 81984  | 103.31 |
| 697 | 50324  | 66659  | 119.19 |
| 698 | 68995  | 75323  | 95.33  |
| 699 | 51804  | 59424  | 101.35 |
| 700 | 38055  | 41933  | 96.33  |
| 701 | 102624 | 123162 | 105.55 |
| 702 | 31100  | 37291  | 105.43 |
| 703 | 46958  | 54901  | 103.82 |
| 704 | 52318  | 64501  | 109.44 |
| 705 | 41266  | 45936  | 97.72  |
| 706 | 23380  | 28353  | 103.95 |
| 707 | 23345  | 24840  | 91.19  |
| 708 | 33392  | 40081  | 106.27 |
| 709 | 63985  | 76822  | 106.60 |
| 710 | 67492  | 71660  | 92.83  |
| 711 | 23218  | 27484  | 105.58 |
| 712 | 57965  | 67153  | 103.26 |
| 713 | 62368  | 81010  | 115.16 |
| 714 | 32250  | 31282  | 85.22  |
| 715 | 34723  | 48381  | 125.58 |
| 716 | 47075  | 66404  | 121.78 |
| 717 | 23003  | 28183  | 108.81 |
| 718 | 62328  | 81576  | 116.82 |
| 719 | 24230  | 32682  | 116.08 |
| 720 | 85480  | 128726 | 131.82 |
| 721 | 53535  | 66112  | 106.72 |
| 722 | 106868 | 130350 | 106.72 |
| 723 | 22879  | 22984  | 87.01  |
| 724 | 32074  | 29201  | 77.82  |
| 725 | 59273  | 70746  | 105.02 |
| 726 | 51620  | 60525  | 102.94 |
| 727 | 67161  | 80685  | 105.29 |
| 728 | 38219  | 49487  | 115.86 |
| 729 | 32423  | 43504  | 120.69 |
| 730 | 47424  | 62981  | 119.16 |
| 731 | 46648  | 60257  | 115.33 |
| 732 | 40985  | 44853  | 95.30  |
| 733 | 33947  | 41176  | 104.35 |
| 734 | 29849  | 32809  | 97.50  |
| 735 | 39423  | 56055  | 127.28 |
| 736 | 22545  | 50736  | 170.74 |
| 737 | 34241  | 41180  | 104.56 |
| 738 | 46137  | 50376  | 96.30  |
| 739 | 33997  | 32591  | 81.59  |
| 740 | 45019  | 58504  | 114.28 |
| 741 | 47609  | 65901  | 120.92 |
| 742 | 43385  | 64843  | 133.05 |
| 743 | 106990 | 125690 | 103.65 |
| 744 | 77290  | 81234  | 92.47  |
| 745 | 30974  | 44493  | 127.97 |

|     |        |        |        |
|-----|--------|--------|--------|
| 746 | 55237  | 109457 | 169.36 |
| 747 | 22289  | 27566  | 109.82 |
| 748 | 22262  | 28430  | 114.07 |
| 749 | 22248  | 24248  | 88.22  |
| 750 | 57816  | 70141  | 104.53 |
| 751 | 59180  | 94748  | 137.42 |
| 752 | 90238  | 117863 | 115.87 |
| 753 | 22136  | 24786  | 99.04  |
| 754 | 104743 | 114254 | 96.25  |
| 755 | 62103  | 73831  | 105.68 |
| 756 | 24522  | 29887  | 108.51 |
| 757 | 26070  | 35307  | 120.77 |
| 758 | 84797  | 102924 | 107.18 |
| 759 | 45976  | 56167  | 106.95 |
| 760 | 25680  | 30241  | 103.53 |
| 761 | 26405  | 28557  | 95.60  |
| 762 | 41295  | 54129  | 116.35 |
| 763 | 21758  | 25788  | 104.82 |
| 764 | 21748  | 23836  | 97.10  |
| 765 | 90478  | 109384 | 106.89 |
| 766 | 33393  | 48993  | 128.41 |
| 767 | 46505  | 51451  | 98.08  |
| 768 | 23012  | 22826  | 86.53  |
| 769 | 107338 | 118110 | 97.48  |
| 770 | 44249  | 53423  | 106.73 |
| 771 | 86812  | 105473 | 106.01 |
| 772 | 38191  | 47802  | 112.25 |
| 773 | 21432  | 60793  | 250.78 |
| 774 | 105745 | 137851 | 114.41 |
| 775 | 21238  | 51033  | 181.29 |
| 776 | 25948  | 32657  | 111.20 |
| 777 | 24521  | 31257  | 113.58 |
| 778 | 82984  | 92835  | 98.16  |
| 779 | 21193  | 34346  | 145.29 |
| 780 | 21089  | 21346  | 88.98  |
| 781 | 27131  | 34851  | 103.38 |
| 782 | 28109  | 31430  | 99.35  |
| 783 | 21038  | 23335  | 98.12  |
| 784 | 21021  | 23239  | 97.97  |
| 785 | 72056  | 87896  | 107.55 |
| 786 | 34189  | 76609  | 193.95 |
| 787 | 104700 | 115971 | 94.77  |
| 788 | 41889  | 61858  | 131.82 |
| 789 | 34407  | 43949  | 112.91 |
| 790 | 20478  | 20409  | 87.35  |
| 791 | 45411  | 63617  | 123.77 |
| 792 | 45525  | 65990  | 121.46 |
| 793 | 48193  | 55512  | 101.97 |
| 794 | 86738  | 86778  | 86.56  |
| 795 | 33311  | 40052  | 106.75 |
| 796 | 34593  | 45108  | 117.26 |
| 797 | 60186  | 71566  | 106.12 |
| 798 | 22801  | 29047  | 104.07 |
| 799 | 46592  | 73850  | 137.55 |
| 800 | 56327  | 67436  | 104.65 |
| 801 | 131917 | 152191 | 102.05 |
| 802 | 33939  | 44874  | 117.99 |
| 803 | 23385  | 25484  | 91.46  |
| 804 | 20186  | 22660  | 100.56 |
| 805 | 49507  | 84416  | 146.58 |
| 806 | 33779  | 49509  | 126.52 |
| 807 | 25451  | 21530  | 72.89  |
| 808 | 45616  | 48661  | 92.64  |
| 809 | 37530  | 43159  | 99.59  |
| 810 | 19852  | 22604  | 96.84  |
| 811 | 42967  | 59100  | 120.94 |
| 812 | 19819  | 12884  | 50.24  |
| 813 | 44889  | 61685  | 121.76 |

|     |        |        |        |
|-----|--------|--------|--------|
| 814 | 111293 | 132273 | 102.52 |
| 815 | 24436  | 21076  | 75.18  |
| 816 | 19780  | 25400  | 110.98 |
| 817 | 24394  | 25758  | 93.11  |
| 818 | 21313  | 20639  | 84.88  |
| 819 | 54158  | 74994  | 121.23 |
| 820 | 56235  | 73825  | 109.32 |
| 821 | 19648  | 30608  | 140.72 |
| 822 | 88098  | 92869  | 92.25  |
| 823 | 42000  | 46880  | 97.86  |
| 824 | 36087  | 50786  | 123.68 |
| 825 | 41929  | 53075  | 112.00 |
| 826 | 19556  | 23540  | 107.58 |
| 827 | 19531  | 22936  | 103.26 |
| 828 | 23012  | 22776  | 86.17  |
| 829 | 118004 | 140577 | 105.47 |
| 830 | 36648  | 78326  | 190.25 |
| 831 | 47757  | 50470  | 92.61  |
| 832 | 25691  | 35547  | 120.99 |
| 833 | 41481  | 50926  | 107.07 |
| 834 | 37544  | 49241  | 118.18 |
| 835 | 40701  | 43832  | 94.02  |
| 836 | 19258  | 20020  | 90.64  |
| 837 | 19219  | 33739  | 149.06 |
| 838 | 19193  | 29968  | 139.86 |
| 839 | 73235  | 75845  | 90.94  |
| 840 | 27586  | 19616  | 60.87  |
| 841 | 19103  | 25603  | 119.74 |
| 842 | 69724  | 62454  | 77.93  |
| 843 | 35117  | 39170  | 99.07  |
| 844 | 20326  | 30193  | 132.64 |
| 845 | 51747  | 76076  | 129.55 |
| 846 | 24467  | 28919  | 98.98  |
| 847 | 33810  | 41582  | 110.22 |
| 848 | 18821  | 21558  | 98.35  |
| 849 | 62708  | 63124  | 86.69  |
| 850 | 40347  | 38940  | 83.46  |
| 851 | 31887  | 38903  | 106.95 |
| 852 | 20882  | 31927  | 137.16 |
| 853 | 27857  | 33791  | 108.60 |
| 854 | 18657  | 32033  | 154.99 |
| 855 | 125850 | 164585 | 115.36 |
| 856 | 57952  | 73088  | 112.01 |
| 857 | 18596  | 21906  | 102.38 |
| 858 | 18545  | 19433  | 91.47  |
| 859 | 18503  | 25272  | 120.70 |
| 860 | 20177  | 31821  | 133.40 |
| 861 | 67627  | 86757  | 113.36 |
| 862 | 36455  | 46458  | 113.01 |
| 863 | 76602  | 91265  | 105.40 |
| 864 | 25285  | 29671  | 103.80 |
| 865 | 18382  | 19172  | 90.93  |
| 866 | 46896  | 56162  | 106.72 |
| 867 | 33048  | 34453  | 92.19  |
| 868 | 26529  | 28845  | 93.88  |
| 869 | 19527  | 24655  | 111.71 |
| 870 | 27617  | 45742  | 145.66 |
| 871 | 30808  | 41737  | 121.20 |
| 872 | 19705  | 27942  | 123.71 |
| 873 | 18216  | 19588  | 95.01  |
| 874 | 30097  | 34189  | 100.79 |
| 875 | 23422  | 29403  | 112.14 |
| 876 | 18190  | 25089  | 124.55 |
| 877 | 20679  | 20784  | 88.94  |
| 878 | 18181  | 23955  | 118.23 |
| 879 | 47946  | 55252  | 101.49 |
| 880 | 39852  | 49450  | 110.58 |
| 881 | 17938  | 49571  | 244.24 |

|     |       |       |        |
|-----|-------|-------|--------|
| 882 | 51665 | 70908 | 121.45 |
| 883 | 37857 | 53520 | 123.09 |
| 884 | 24914 | 33863 | 118.41 |
| 885 | 17817 | 23297 | 116.96 |
| 886 | 27149 | 27241 | 88.16  |
| 887 | 17811 | 19911 | 98.98  |
| 888 | 35172 | 34054 | 84.33  |
| 889 | 36842 | 47465 | 112.52 |
| 890 | 17802 | 32954 | 164.07 |
| 891 | 28629 | 33310 | 103.85 |
| 892 | 32327 | 44100 | 119.07 |
| 893 | 44810 | 75044 | 138.50 |
| 894 | 35192 | 44860 | 113.00 |
| 895 | 41820 | 45173 | 94.90  |
| 896 | 17612 | 21630 | 108.39 |
| 897 | 50619 | 63942 | 107.42 |
| 898 | 30808 | 35025 | 98.34  |
| 899 | 21077 | 24647 | 101.78 |
| 900 | 17577 | 12635 | 54.62  |
| 901 | 17556 | 19010 | 96.55  |
| 902 | 33427 | 39080 | 103.73 |
| 903 | 17533 | 12560 | 55.95  |
| 904 | 17533 | 22055 | 111.80 |
| 905 | 49366 | 63322 | 104.92 |
| 906 | 72863 | 79361 | 94.55  |
| 907 | 37288 | 33110 | 75.51  |
| 908 | 17321 | 16273 | 81.30  |
| 909 | 44251 | 63558 | 122.25 |
| 910 | 20787 | 26776 | 114.20 |
| 911 | 27210 | 29804 | 96.14  |
| 912 | 22842 | 27120 | 105.86 |
| 913 | 28273 | 38425 | 121.04 |
| 914 | 59972 | 98498 | 141.76 |
| 915 | 20581 | 29829 | 125.14 |
| 916 | 27678 | 39269 | 124.55 |
| 917 | 31762 | 38045 | 104.76 |
| 918 | 28192 | 50025 | 157.97 |
| 919 | 17072 | 16300 | 83.36  |
| 920 | 54551 | 54773 | 88.61  |
| 921 | 27730 | 56720 | 178.98 |
| 922 | 20262 | 27565 | 120.33 |
| 923 | 37051 | 43703 | 105.36 |
| 924 | 16966 | 16154 | 82.88  |
| 925 | 16942 | 18939 | 97.91  |
| 926 | 33793 | 39321 | 100.00 |
| 927 | 38208 | 44740 | 102.67 |
| 928 | 65005 | 87613 | 118.63 |
| 929 | 24709 | 29927 | 105.69 |
| 930 | 40890 | 53138 | 115.69 |
| 931 | 24757 | 38190 | 134.19 |
| 932 | 16673 | 20958 | 111.92 |
| 933 | 16649 | 14823 | 77.03  |
| 934 | 56983 | 58892 | 90.35  |
| 935 | 28773 | 34451 | 102.23 |
| 936 | 55112 | 64774 | 103.59 |
| 937 | 28911 | 32122 | 93.48  |
| 938 | 21306 | 45364 | 187.98 |
| 939 | 49145 | 60836 | 107.50 |
| 940 | 22116 | 25535 | 101.99 |
| 941 | 16518 | 26263 | 136.38 |
| 942 | 16495 | 22858 | 122.75 |
| 943 | 16489 | 18266 | 97.14  |
| 944 | 18027 | 62699 | 307.79 |
| 945 | 16378 | 24455 | 124.86 |
| 946 | 17769 | 26262 | 131.07 |
| 947 | 51110 | 51368 | 86.96  |
| 948 | 16327 | 98239 | 521.97 |
| 949 | 25326 | 32560 | 111.80 |

|      |       |        |        |
|------|-------|--------|--------|
| 950  | 77800 | 90597  | 102.97 |
| 951  | 45734 | 44674  | 85.30  |
| 952  | 16218 | 52461  | 285.83 |
| 953  | 30396 | 40259  | 117.77 |
| 954  | 16192 | 21738  | 120.34 |
| 955  | 37864 | 46730  | 108.89 |
| 956  | 25069 | 30356  | 106.88 |
| 957  | 16156 | 18715  | 100.87 |
| 958  | 36171 | 37251  | 89.61  |
| 959  | 38889 | 74340  | 161.42 |
| 960  | 21076 | 24859  | 103.55 |
| 961  | 16085 | 23253  | 129.26 |
| 962  | 63448 | 88572  | 123.75 |
| 963  | 95910 | 116752 | 106.46 |
| 964  | 16018 | 19805  | 110.57 |
| 965  | 32788 | 45409  | 121.01 |
| 966  | 15994 | 17114  | 93.97  |
| 967  | 19234 | 21498  | 98.22  |
| 968  | 19716 | 27511  | 125.21 |
| 969  | 32838 | 43762  | 115.43 |
| 970  | 15904 | 40180  | 217.58 |
| 971  | 15853 | 17989  | 101.66 |
| 972  | 45660 | 57284  | 111.54 |
| 973  | 29818 | 49164  | 144.11 |
| 974  | 27625 | 35364  | 113.05 |
| 975  | 15754 | 42502  | 231.70 |
| 976  | 15724 | 26973  | 152.58 |
| 977  | 21619 | 25039  | 104.12 |
| 978  | 38997 | 49148  | 109.80 |
| 979  | 15640 | 20086  | 114.73 |
| 980  | 15636 | 24826  | 136.67 |
| 981  | 23400 | 29245  | 110.59 |
| 982  | 30046 | 34070  | 100.66 |
| 983  | 47888 | 67142  | 123.00 |
| 984  | 59271 | 68455  | 101.67 |
| 985  | 43505 | 44109  | 87.99  |
| 986  | 52902 | 60378  | 100.79 |
| 987  | 53247 | 72083  | 120.50 |
| 988  | 15473 | 21694  | 126.63 |
| 989  | 18146 | 22531  | 109.82 |
| 990  | 25307 | 29741  | 101.12 |
| 991  | 15400 | 15445  | 87.52  |
| 992  | 29243 | 33306  | 97.51  |
| 993  | 15342 | 20673  | 96.89  |
| 994  | 33791 | 33050  | 84.63  |
| 995  | 15322 | 9952   | 51.75  |
| 996  | 16471 | 17756  | 94.26  |
| 997  | 15287 | 13211  | 74.99  |
| 998  | 27517 | 34983  | 112.57 |
| 999  | 15277 | 37306  | 210.17 |
| 1000 | 45122 | 71619  | 139.23 |
| 1001 | 15255 | 14202  | 81.24  |
| 1002 | 15221 | 31740  | 184.41 |
| 1003 | 40028 | 66262  | 145.55 |
| 1004 | 18510 | 20050  | 95.80  |
| 1005 | 19565 | 22116  | 95.11  |
| 1006 | 20301 | 31909  | 136.04 |
| 1007 | 48529 | 62139  | 111.43 |
| 1008 | 15153 | 30246  | 172.53 |
| 1009 | 21794 | 25451  | 103.00 |
| 1010 | 15120 | 22170  | 131.75 |
| 1011 | 37701 | 61589  | 145.02 |
| 1012 | 28580 | 33369  | 102.75 |
| 1013 | 67615 | 69585  | 90.97  |
| 1014 | 15082 | 16769  | 97.94  |
| 1015 | 17101 | 32861  | 171.17 |
| 1016 | 47132 | 55375  | 100.67 |
| 1017 | 40547 | 51640  | 113.19 |



|      |       |        |        |
|------|-------|--------|--------|
| 1018 | 45323 | 63690  | 124.94 |
| 1019 | 14996 | 20175  | 96.95  |
| 1020 | 31566 | 31708  | 87.65  |
| 1021 | 14933 | 14358  | 81.99  |
| 1022 | 14900 | 15485  | 92.62  |
| 1023 | 19797 | 28115  | 126.88 |
| 1024 | 14890 | 17072  | 101.34 |
| 1025 | 14888 | 21565  | 128.55 |
| 1026 | 14869 | 27523  | 163.55 |
| 1027 | 50311 | 58415  | 99.83  |
| 1028 | 14858 | 25966  | 152.15 |
| 1029 | 19966 | 26616  | 118.49 |
| 1030 | 30157 | 143201 | 320.37 |
| 1031 | 14811 | 16475  | 96.46  |
| 1032 | 31079 | 45654  | 121.84 |
| 1033 | 61600 | 69409  | 99.75  |
| 1034 | 14782 | 43849  | 262.93 |
| 1035 | 64388 | 84052  | 112.37 |
| 1036 | 14753 | 23169  | 139.41 |
| 1037 | 14726 | 18832  | 113.96 |
| 1038 | 29828 | 40982  | 121.31 |
| 1039 | 14697 | 16108  | 96.58  |
| 1040 | 14644 | 42095  | 257.29 |
| 1041 | 26257 | 24011  | 80.00  |
| 1042 | 14582 | 17030  | 103.60 |
| 1043 | 42967 | 62441  | 129.43 |
| 1044 | 14525 | 13163  | 77.12  |
| 1045 | 45691 | 113481 | 210.25 |
| 1046 | 30059 | 39934  | 120.27 |
| 1047 | 27552 | 51538  | 164.17 |
| 1048 | 26963 | 72110  | 241.27 |
| 1049 | 35271 | 40510  | 99.31  |
| 1050 | 68262 | 118703 | 136.92 |
| 1051 | 68848 | 87188  | 110.48 |
| 1052 | 44243 | 50281  | 100.29 |
| 1053 | 23352 | 28589  | 107.97 |
| 1054 | 18928 | 23819  | 110.24 |
| 1055 | 20675 | 22156  | 93.42  |
| 1056 | 34025 | 45730  | 119.48 |
| 1057 | 14204 | 20412  | 127.17 |
| 1058 | 14201 | 31931  | 199.68 |
| 1059 | 38281 | 47746  | 109.09 |
| 1060 | 22843 | 28967  | 109.78 |
| 1061 | 14182 | 19010  | 119.95 |
| 1062 | 14182 | 17595  | 111.01 |
| 1063 | 17506 | 22560  | 114.63 |
| 1064 | 14167 | 17921  | 111.08 |
| 1065 | 14160 | 17739  | 108.62 |
| 1066 | 14151 | 19731  | 120.75 |
| 1067 | 28235 | 33590  | 103.22 |
| 1068 | 30126 | 32482  | 90.40  |
| 1069 | 22382 | 15392  | 58.43  |
| 1070 | 14079 | 44872  | 277.59 |
| 1071 | 23181 | 29222  | 112.85 |
| 1072 | 24049 | 29323  | 109.10 |
| 1073 | 26369 | 60494  | 198.16 |
| 1074 | 27774 | 27485  | 86.70  |
| 1075 | 25657 | 30409  | 102.81 |
| 1076 | 13935 | 15825  | 99.43  |
| 1077 | 39247 | 65704  | 146.09 |
| 1078 | 21829 | 26706  | 105.97 |
| 1079 | 13834 | 22903  | 144.43 |
| 1080 | 13811 | 16338  | 105.73 |
| 1081 | 20011 | 20353  | 89.00  |
| 1082 | 58033 | 55885  | 80.41  |
| 1083 | 25993 | 30253  | 101.96 |
| 1084 | 17405 | 18117  | 90.59  |
| 1085 | 20531 | 22657  | 98.14  |

|      |       |       |        |
|------|-------|-------|--------|
| 1086 | 13728 | 15128 | 96.42  |
| 1087 | 13728 | 25007 | 156.20 |
| 1088 | 15638 | 26312 | 140.63 |
| 1089 | 27371 | 34626 | 113.40 |
| 1090 | 38893 | 54625 | 123.40 |
| 1091 | 17077 | 22272 | 114.92 |
| 1092 | 25225 | 47735 | 169.89 |
| 1093 | 28937 | 36149 | 109.00 |
| 1094 | 13617 | 16250 | 101.25 |
| 1095 | 13583 | 21085 | 136.42 |
| 1096 | 26648 | 48023 | 155.55 |
| 1097 | 13517 | 29236 | 190.97 |
| 1098 | 34122 | 39528 | 101.22 |
| 1099 | 36320 | 44237 | 107.18 |
| 1100 | 19283 | 25206 | 116.97 |
| 1101 | 23711 | 28309 | 103.64 |
| 1102 | 18573 | 22595 | 108.41 |
| 1103 | 17775 | 24754 | 125.40 |
| 1104 | 13358 | 17955 | 120.46 |
| 1105 | 27488 | 33161 | 105.58 |
| 1106 | 13307 | 16964 | 113.98 |
| 1107 | 25236 | 26880 | 94.34  |
| 1108 | 21995 | 28887 | 113.02 |
| 1109 | 23053 | 23419 | 87.31  |
| 1110 | 16530 | 25067 | 134.47 |
| 1111 | 15636 | 17600 | 95.64  |
| 1112 | 19123 | 27153 | 120.83 |
| 1113 | 20992 | 26379 | 111.99 |
| 1114 | 32288 | 39030 | 107.02 |
| 1115 | 17816 | 34684 | 169.66 |
| 1116 | 13092 | 19010 | 125.98 |
| 1117 | 16176 | 19865 | 109.25 |
| 1118 | 17539 | 19838 | 97.30  |
| 1119 | 55633 | 66176 | 105.16 |
| 1120 | 24300 | 35494 | 129.98 |
| 1121 | 21339 | 23865 | 97.24  |
| 1122 | 12966 | 16917 | 114.19 |
| 1123 | 12953 | 21950 | 148.99 |
| 1124 | 17743 | 26386 | 132.68 |
| 1125 | 35572 | 40540 | 97.06  |
| 1126 | 18941 | 28272 | 131.92 |
| 1127 | 12873 | 30934 | 212.65 |
| 1128 | 21111 | 25216 | 105.41 |
| 1129 | 15038 | 11898 | 66.78  |
| 1130 | 12738 | 12726 | 86.34  |
| 1131 | 12719 | 16327 | 115.27 |
| 1132 | 15311 | 21426 | 121.03 |
| 1133 | 24656 | 33503 | 114.10 |
| 1134 | 12709 | 12005 | 82.25  |
| 1135 | 21903 | 26167 | 106.04 |
| 1136 | 12661 | 15701 | 108.90 |
| 1137 | 13898 | 14529 | 92.77  |
| 1138 | 18810 | 17874 | 81.77  |
| 1139 | 12581 | 14570 | 103.16 |
| 1140 | 28861 | 26812 | 81.29  |
| 1141 | 26722 | 31988 | 106.95 |
| 1142 | 12548 | 16556 | 113.57 |
| 1143 | 12537 | 17368 | 121.76 |
| 1144 | 12529 | 20672 | 145.67 |
| 1145 | 12516 | 26805 | 189.19 |
| 1146 | 12511 | 12383 | 87.08  |
| 1147 | 14513 | 16121 | 98.55  |
| 1148 | 18713 | 36351 | 170.75 |
| 1149 | 12476 | 18097 | 120.96 |
| 1150 | 39453 | 49701 | 108.45 |
| 1151 | 12467 | 16483 | 117.43 |
| 1152 | 56779 | 77220 | 120.11 |
| 1153 | 24452 | 31050 | 113.02 |

|      |       |       |        |
|------|-------|-------|--------|
| 1154 | 19734 | 19952 | 88.95  |
| 1155 | 15557 | 15992 | 90.01  |
| 1156 | 15194 | 17376 | 98.92  |
| 1157 | 15553 | 38882 | 217.54 |
| 1158 | 13880 | 26309 | 173.81 |
| 1159 | 12365 | 10450 | 72.44  |
| 1160 | 63277 | 50195 | 68.95  |
| 1161 | 12312 | 12499 | 88.76  |
| 1162 | 28596 | 88353 | 256.51 |
| 1163 | 53820 | 73592 | 120.87 |
| 1164 | 12270 | 15943 | 116.49 |
| 1165 | 12268 | 26726 | 193.62 |
| 1166 | 12246 | 11853 | 84.43  |
| 1167 | 18827 | 40040 | 167.19 |
| 1168 | 31992 | 37060 | 101.12 |
| 1169 | 31804 | 38042 | 105.90 |
| 1170 | 23920 | 33287 | 125.20 |
| 1171 | 23861 | 28978 | 106.83 |
| 1172 | 22957 | 21486 | 81.83  |
| 1173 | 12129 | 17137 | 128.18 |
| 1174 | 12097 | 10861 | 76.34  |
| 1175 | 25566 | 31617 | 108.06 |
| 1176 | 12060 | 28087 | 207.62 |
| 1177 | 30542 | 34805 | 102.20 |
| 1178 | 12029 | 14948 | 107.87 |
| 1179 | 12019 | 16525 | 121.96 |
| 1180 | 12012 | 12444 | 90.93  |
| 1181 | 12010 | 7665  | 54.72  |
| 1182 | 37938 | 40731 | 90.73  |
| 1183 | 11932 | 30651 | 228.20 |
| 1184 | 33542 | 42344 | 110.60 |
| 1185 | 21609 | 32610 | 131.58 |
| 1186 | 33498 | 43611 | 116.12 |
| 1187 | 17743 | 16892 | 83.36  |
| 1188 | 14460 | 12738 | 76.01  |
| 1189 | 11854 | 21719 | 164.05 |
| 1190 | 11851 | 16431 | 121.88 |
| 1191 | 13650 | 13238 | 83.57  |
| 1192 | 32901 | 38754 | 104.32 |
| 1193 | 18783 | 21929 | 100.62 |
| 1194 | 11779 | 18119 | 137.32 |
| 1195 | 21789 | 27623 | 110.82 |
| 1196 | 20760 | 15874 | 65.68  |
| 1197 | 18629 | 30726 | 145.83 |
| 1198 | 11698 | 10402 | 77.00  |
| 1199 | 18900 | 32769 | 152.59 |
| 1200 | 21313 | 33131 | 137.80 |
| 1201 | 13374 | 18190 | 118.90 |
| 1202 | 11639 | 25100 | 188.53 |
| 1203 | 16235 | 15443 | 84.04  |
| 1204 | 16745 | 18749 | 98.92  |
| 1205 | 11581 | 15410 | 115.77 |
| 1206 | 11554 | 15816 | 123.31 |
| 1207 | 52012 | 52153 | 86.66  |
| 1208 | 25564 | 27841 | 95.44  |
| 1209 | 11519 | 19203 | 130.07 |
| 1210 | 27492 | 38013 | 122.69 |
| 1211 | 11495 | 13691 | 106.29 |
| 1212 | 14752 | 12940 | 75.12  |
| 1213 | 32646 | 40536 | 110.05 |
| 1214 | 11405 | 16648 | 129.21 |
| 1215 | 11359 | 21984 | 148.79 |
| 1216 | 47817 | 55104 | 102.43 |
| 1217 | 17792 | 19092 | 92.30  |
| 1218 | 11296 | 15977 | 115.88 |
| 1219 | 14979 | 15058 | 85.56  |
| 1220 | 17756 | 17376 | 86.52  |
| 1221 | 11242 | 21579 | 165.73 |

|      |       |        |        |
|------|-------|--------|--------|
| 1222 | 13558 | 16878  | 105.79 |
| 1223 | 11141 | 28779  | 185.37 |
| 1224 | 17266 | 22627  | 117.43 |
| 1225 | 15169 | 50170  | 286.82 |
| 1226 | 52077 | 65882  | 110.34 |
| 1227 | 20693 | 29455  | 123.60 |
| 1228 | 13861 | 16705  | 105.33 |
| 1229 | 26683 | 39252  | 128.10 |
| 1230 | 17855 | 18444  | 88.77  |
| 1231 | 15354 | 25466  | 142.42 |
| 1232 | 12928 | 17207  | 117.05 |
| 1233 | 11039 | 17934  | 142.34 |
| 1234 | 43912 | 78212  | 142.36 |
| 1235 | 17602 | 13284  | 65.46  |
| 1236 | 11004 | 11776  | 94.25  |
| 1237 | 16669 | 18516  | 98.85  |
| 1238 | 20297 | 28751  | 122.98 |
| 1239 | 12514 | 29604  | 195.66 |
| 1240 | 28293 | 32481  | 100.38 |
| 1241 | 39606 | 51446  | 113.35 |
| 1242 | 10899 | 10503  | 85.12  |
| 1243 | 10867 | 15872  | 124.51 |
| 1244 | 16740 | 19115  | 99.05  |
| 1245 | 10856 | 16279  | 125.40 |
| 1246 | 10840 | 16808  | 140.90 |
| 1247 | 10802 | 25603  | 204.82 |
| 1248 | 10782 | 11514  | 92.48  |
| 1249 | 10772 | 52263  | 398.86 |
| 1250 | 10749 | 27704  | 222.93 |
| 1251 | 10738 | 13679  | 109.14 |
| 1252 | 12959 | 18395  | 126.31 |
| 1253 | 10702 | 10047  | 81.58  |
| 1254 | 10701 | 15551  | 129.79 |
| 1255 | 12557 | 10717  | 72.05  |
| 1256 | 31820 | 79565  | 218.66 |
| 1257 | 10623 | 10613  | 87.42  |
| 1258 | 18285 | 147588 | 710.54 |
| 1259 | 10583 | 18344  | 159.05 |
| 1260 | 10539 | 14083  | 118.45 |
| 1261 | 10535 | 30648  | 253.93 |
| 1262 | 30906 | 34829  | 99.76  |
| 1263 | 10474 | 8320   | 68.56  |
| 1264 | 21723 | 22416  | 90.25  |
| 1265 | 13674 | 20995  | 138.37 |
| 1266 | 10424 | 12692  | 106.77 |
| 1267 | 27354 | 38741  | 121.58 |
| 1268 | 26981 | 30407  | 99.22  |
| 1269 | 22087 | 26544  | 104.93 |
| 1270 | 20308 | 24932  | 109.11 |
| 1271 | 10346 | 20046  | 170.93 |
| 1272 | 32895 | 34751  | 91.72  |
| 1273 | 10306 | 37181  | 298.81 |
| 1274 | 13214 | 14202  | 93.66  |
| 1275 | 23552 | 33503  | 125.64 |
| 1276 | 10257 | 22786  | 197.93 |
| 1277 | 12583 | 10938  | 75.77  |
| 1278 | 10246 | 39568  | 333.98 |
| 1279 | 10236 | 11897  | 101.99 |
| 1280 | 13873 | 26671  | 167.25 |
| 1281 | 33531 | 69094  | 178.06 |
| 1282 | 39456 | 52451  | 108.46 |
| 1283 | 10160 | 10757  | 94.33  |
| 1284 | 10155 | 16923  | 117.66 |
| 1285 | 24565 | 22110  | 77.66  |
| 1286 | 10136 | 13811  | 121.96 |
| 1287 | 15718 | 20150  | 112.50 |
| 1288 | 12930 | 46370  | 330.91 |
| 1289 | 10087 | 12168  | 106.83 |

|      |       |        |        |
|------|-------|--------|--------|
| 1290 | 15829 | 12529  | 67.91  |
| 1291 | 22848 | 27429  | 104.74 |
| 1292 | 15235 | 171808 | 971.18 |
| 1293 | 9994  | 12640  | 104.61 |
| 1294 | 9943  | 15119  | 137.53 |
| 1295 | 9940  | 11531  | 101.81 |
| 1296 | 30428 | 44878  | 127.82 |
| 1297 | 28124 | 31283  | 96.88  |
| 1298 | 20562 | 25947  | 107.30 |
| 1299 | 12384 | 13687  | 96.31  |
| 1300 | 9875  | 11734  | 105.24 |
| 1301 | 9843  | 37892  | 335.99 |
| 1302 | 18185 | 23101  | 112.63 |
| 1303 | 33273 | 36662  | 97.24  |
| 1304 | 9805  | 13414  | 123.40 |
| 1305 | 23116 | 35744  | 134.46 |
| 1306 | 9781  | 33558  | 251.00 |
| 1307 | 26495 | 26924  | 88.89  |
| 1308 | 9769  | 13616  | 123.93 |
| 1309 | 14992 | 13458  | 77.43  |
| 1310 | 21956 | 27199  | 109.39 |
| 1311 | 14562 | 17269  | 101.08 |
| 1312 | 20127 | 24275  | 106.38 |
| 1313 | 9678  | 13454  | 118.23 |
| 1314 | 9668  | 17228  | 158.68 |
| 1315 | 9631  | 8180   | 71.43  |
| 1316 | 9631  | 9759   | 87.86  |
| 1317 | 9624  | 14494  | 131.36 |
| 1318 | 9621  | 35252  | 314.60 |
| 1319 | 11297 | 13244  | 101.47 |
| 1320 | 13424 | 16772  | 107.59 |
| 1321 | 26561 | 27444  | 91.11  |
| 1322 | 9579  | 9649   | 88.69  |
| 1323 | 9519  | 17001  | 158.36 |
| 1324 | 18145 | 44077  | 209.41 |
| 1325 | 9514  | 12490  | 117.60 |
| 1326 | 9496  | 10788  | 100.84 |
| 1327 | 9473  | 15553  | 146.04 |
| 1328 | 9456  | 21750  | 193.40 |
| 1329 | 9446  | 12663  | 116.37 |
| 1330 | 17062 | 23501  | 120.18 |
| 1331 | 19082 | 26408  | 120.46 |
| 1332 | 18250 | 31391  | 145.12 |
| 1333 | 12258 | 13708  | 94.31  |
| 1334 | 9376  | 14929  | 136.44 |
| 1335 | 9351  | 19368  | 184.13 |
| 1336 | 14164 | 16053  | 98.53  |
| 1337 | 17057 | 18659  | 95.77  |
| 1338 | 19255 | 22097  | 103.28 |
| 1339 | 20729 | 21993  | 93.96  |
| 1340 | 11463 | 18827  | 137.34 |
| 1341 | 14354 | 18332  | 113.80 |
| 1342 | 35348 | 47881  | 120.92 |
| 1343 | 21154 | 23582  | 98.04  |
| 1344 | 18172 | 20330  | 99.26  |
| 1345 | 9250  | 21983  | 203.15 |
| 1346 | 9232  | 28883  | 260.37 |
| 1347 | 22525 | 30060  | 119.25 |
| 1348 | 15136 | 24089  | 130.57 |
| 1349 | 22915 | 35680  | 135.69 |
| 1350 | 14304 | 36480  | 224.21 |
| 1351 | 15263 | 17896  | 104.19 |
| 1352 | 11780 | 18017  | 129.44 |
| 1353 | 9983  | 13973  | 123.93 |
| 1354 | 23189 | 28071  | 104.68 |
| 1355 | 16560 | 20008  | 105.17 |
| 1356 | 15034 | 21142  | 124.94 |
| 1357 | 9087  | 18549  | 178.45 |

|      |       |       |        |
|------|-------|-------|--------|
| 1358 | 19624 | 22250 | 99.24  |
| 1359 | 19296 | 25229 | 116.78 |
| 1360 | 13143 | 11975 | 79.50  |
| 1361 | 9024  | 13921 | 137.34 |
| 1362 | 16247 | 13090 | 70.03  |
| 1363 | 8976  | 12707 | 128.03 |
| 1364 | 12052 | 14164 | 104.15 |
| 1365 | 12726 | 24954 | 170.81 |
| 1366 | 16356 | 19990 | 105.73 |
| 1367 | 8886  | 24573 | 242.37 |
| 1368 | 11962 | 16982 | 126.83 |
| 1369 | 8856  | 9459  | 94.11  |
| 1370 | 8837  | 26001 | 249.77 |
| 1371 | 8822  | 5062  | 45.49  |
| 1372 | 8821  | 15826 | 153.50 |
| 1373 | 22580 | 22792 | 87.58  |
| 1374 | 18151 | 23204 | 112.85 |
| 1375 | 8759  | 15518 | 155.30 |
| 1376 | 8756  | 12128 | 125.42 |
| 1377 | 8732  | 3956  | 37.53  |
| 1378 | 19490 | 25821 | 117.54 |
| 1379 | 14804 | 19844 | 118.95 |
| 1380 | 8694  | 54903 | 509.64 |
| 1381 | 8688  | 16078 | 167.48 |
| 1382 | 8673  | 9986  | 101.31 |
| 1383 | 17256 | 46257 | 229.03 |
| 1384 | 8581  | 11699 | 122.09 |
| 1385 | 8549  | 10590 | 110.17 |
| 1386 | 8539  | 11641 | 122.65 |
| 1387 | 8511  | 19082 | 196.21 |
| 1388 | 20310 | 24301 | 106.43 |
| 1389 | 11740 | 14738 | 109.86 |
| 1390 | 8501  | 47086 | 376.11 |
| 1391 | 8481  | 10726 | 111.68 |
| 1392 | 14214 | 14691 | 90.42  |
| 1393 | 8468  | 6856  | 57.18  |
| 1394 | 16089 | 23424 | 129.24 |
| 1395 | 11429 | 10975 | 81.01  |
| 1396 | 11302 | 13669 | 104.52 |
| 1397 | 13966 | 11635 | 68.31  |
| 1398 | 8399  | 18516 | 185.04 |
| 1399 | 11892 | 18601 | 135.98 |
| 1400 | 8364  | 10101 | 106.28 |
| 1401 | 8359  | 10999 | 115.53 |
| 1402 | 8296  | 9462  | 102.14 |
| 1403 | 8268  | 8555  | 89.73  |
| 1404 | 8249  | 9411  | 98.59  |
| 1405 | 20615 | 19825 | 85.12  |
| 1406 | 8248  | 14359 | 156.42 |
| 1407 | 8234  | 9756  | 103.97 |
| 1408 | 8226  | 14608 | 152.64 |
| 1409 | 8223  | 17992 | 191.95 |
| 1410 | 14838 | 33295 | 184.79 |
| 1411 | 12776 | 19260 | 134.60 |
| 1412 | 8167  | 10855 | 118.86 |
| 1413 | 16273 | 15763 | 83.76  |
| 1414 | 8162  | 10408 | 111.67 |
| 1415 | 13869 | 14594 | 91.32  |
| 1416 | 8160  | 10440 | 109.88 |
| 1417 | 8152  | 10217 | 109.09 |
| 1418 | 23065 | 31068 | 117.81 |
| 1419 | 8143  | 7477  | 73.97  |
| 1420 | 14417 | 41841 | 251.18 |
| 1421 | 8138  | 39254 | 433.27 |
| 1422 | 16095 | 15305 | 81.82  |
| 1423 | 8123  | 10147 | 108.90 |
| 1424 | 18917 | 27291 | 126.88 |
| 1425 | 8039  | 16583 | 182.71 |

|      |       |         |          |
|------|-------|---------|----------|
| 1426 | 8014  | 10278   | 114.87   |
| 1427 | 8007  | 11897   | 132.50   |
| 1428 | 10229 | 11119   | 95.13    |
| 1429 | 7970  | 12200   | 128.97   |
| 1430 | 12738 | 15892   | 110.35   |
| 1431 | 7947  | 11565   | 125.06   |
| 1432 | 7947  | 9512    | 106.77   |
| 1433 | 7945  | 5851    | 61.09    |
| 1434 | 23746 | 25809   | 95.11    |
| 1435 | 25555 | 32500   | 108.10   |
| 1436 | 25179 | 25174   | 85.45    |
| 1437 | 20633 | 28766   | 123.66   |
| 1438 | 7785  | 9363    | 106.86   |
| 1439 | 13450 | 15481   | 99.52    |
| 1440 | 7754  | 9979    | 115.21   |
| 1441 | 7753  | 8048    | 91.30    |
| 1442 | 7737  | 3289    | 35.92    |
| 1443 | 13457 | 31170   | 199.09   |
| 1444 | 7718  | 2955    | 33.96    |
| 1445 | 17908 | 34598   | 163.38   |
| 1446 | 13262 | 11333   | 74.84    |
| 1447 | 7675  | 16269   | 186.04   |
| 1448 | 7664  | 12001   | 141.47   |
| 1449 | 10310 | 7845    | 64.06    |
| 1450 | 14312 | 17903   | 110.01   |
| 1451 | 13857 | 15309   | 98.09    |
| 1452 | 7623  | 21253   | 249.07   |
| 1453 | 9310  | 9578    | 90.95    |
| 1454 | 7577  | 13759   | 149.66   |
| 1455 | 7568  | 8439    | 98.89    |
| 1456 | 15131 | 42484   | 239.27   |
| 1457 | 22365 | 32930   | 127.56   |
| 1458 | 15214 | 52480   | 278.70   |
| 1459 | 7542  | 8954    | 104.10   |
| 1460 | 7509  | 20260   | 234.06   |
| 1461 | 14570 | 10801   | 63.60    |
| 1462 | 10552 | 11369   | 94.76    |
| 1463 | 7490  | 9091    | 105.08   |
| 1464 | 7480  | 7415    | 86.48    |
| 1465 | 7476  | 15874   | 185.48   |
| 1466 | 7470  | 14675   | 170.05   |
| 1467 | 7457  | 6504    | 77.42    |
| 1468 | 12782 | 13455   | 90.04    |
| 1469 | 14549 | 25432   | 152.20   |
| 1470 | 7415  | 4776    | 54.13    |
| 1471 | 22950 | 20273   | 72.35    |
| 1472 | 20766 | 36040   | 152.93   |
| 1473 | 7391  | 3666632 | 45605.90 |
| 1474 | 7368  | 9790    | 107.12   |
| 1475 | 7368  | 20835   | 257.11   |
| 1476 | 10149 | 12413   | 109.04   |
| 1477 | 13231 | 33490   | 209.32   |
| 1478 | 12238 | 31561   | 225.30   |
| 1479 | 7295  | 8378    | 97.46    |
| 1480 | 9361  | 10985   | 97.29    |
| 1481 | 20775 | 33653   | 141.47   |
| 1482 | 14451 | 16016   | 96.56    |
| 1483 | 7253  | 7973    | 97.48    |
| 1484 | 7251  | 18515   | 182.96   |
| 1485 | 7214  | 16166   | 177.88   |
| 1486 | 23377 | 34231   | 121.72   |
| 1487 | 7203  | 15980   | 197.54   |
| 1488 | 11128 | 24303   | 191.47   |
| 1489 | 7201  | 15725   | 184.10   |
| 1490 | 7184  | 10536   | 124.52   |
| 1491 | 11000 | 22234   | 178.88   |
| 1492 | 7109  | 3892    | 44.97    |
| 1493 | 7089  | 19036   | 232.36   |

|      |       |       |        |
|------|-------|-------|--------|
| 1494 | 7077  | 5737  | 65.75  |
| 1495 | 7064  | 19834 | 244.32 |
| 1496 | 23304 | 49594 | 186.08 |
| 1497 | 16567 | 22380 | 112.70 |
| 1498 | 7026  | 3031  | 34.89  |
| 1499 | 12392 | 21134 | 145.22 |
| 1500 | 7020  | 11103 | 138.79 |
| 1501 | 7009  | 7905  | 96.93  |
| 1502 | 10702 | 28032 | 222.56 |
| 1503 | 22234 | 25394 | 101.15 |
| 1504 | 13078 | 13742 | 93.29  |
| 1505 | 18268 | 41484 | 194.91 |
| 1506 | 16224 | 18968 | 103.30 |
| 1507 | 9891  | 9991  | 87.08  |
| 1508 | 6851  | 6407  | 80.75  |
| 1509 | 8503  | 10078 | 106.47 |
| 1510 | 8569  | 12190 | 119.61 |
| 1511 | 6830  | 3582  | 46.97  |
| 1512 | 15519 | 18581 | 99.30  |
| 1513 | 6800  | 15443 | 181.30 |
| 1514 | 8093  | 10728 | 117.56 |
| 1515 | 9002  | 11631 | 111.31 |
| 1516 | 11893 | 18159 | 139.15 |
| 1517 | 8056  | 5999  | 62.31  |
| 1518 | 6717  | 39158 | 511.68 |
| 1519 | 6691  | 7913  | 104.51 |
| 1520 | 6647  | 4946  | 62.29  |
| 1521 | 6627  | 5623  | 72.40  |
| 1522 | 6613  | 5249  | 68.32  |
| 1523 | 6607  | 10467 | 143.54 |
| 1524 | 6605  | 9830  | 131.34 |
| 1525 | 6570  | 9757  | 132.89 |
| 1526 | 11897 | 18590 | 139.25 |
| 1527 | 6567  | 16816 | 229.79 |
| 1528 | 6556  | 10922 | 151.58 |
| 1529 | 14253 | 13926 | 84.47  |
| 1530 | 6535  | 21043 | 281.98 |
| 1531 | 6531  | 6461  | 88.10  |
| 1532 | 6530  | 3042  | 43.07  |
| 1533 | 18862 | 26629 | 121.63 |
| 1534 | 9969  | 13437 | 120.03 |
| 1535 | 6511  | 7811  | 106.43 |
| 1536 | 11802 | 63129 | 488.36 |
| 1537 | 6491  | 5250  | 69.28  |
| 1538 | 6471  | 7539  | 103.82 |
| 1539 | 6436  | 12186 | 163.96 |
| 1540 | 6432  | 6290  | 85.69  |
| 1541 | 6415  | 4642  | 57.61  |
| 1542 | 6407  | 5141  | 67.30  |
| 1543 | 36691 | 47621 | 112.69 |
| 1544 | 8009  | 9224  | 101.43 |
| 1545 | 6368  | 10122 | 142.45 |
| 1546 | 7812  | 17068 | 187.94 |
| 1547 | 11731 | 12428 | 93.12  |
| 1548 | 6341  | 4714  | 63.17  |
| 1549 | 10959 | 13310 | 100.78 |
| 1550 | 6319  | 10769 | 149.01 |
| 1551 | 9107  | 9855  | 94.96  |
| 1552 | 10214 | 13629 | 116.77 |
| 1553 | 6281  | 15192 | 171.85 |
| 1554 | 7977  | 19323 | 198.03 |
| 1555 | 8612  | 12995 | 125.65 |
| 1556 | 6235  | 5809  | 80.60  |
| 1557 | 9693  | 16445 | 143.42 |
| 1558 | 10127 | 18021 | 154.60 |
| 1559 | 6185  | 7718  | 110.69 |
| 1560 | 6166  | 6392  | 87.44  |
| 1561 | 7795  | 10232 | 113.96 |



|      |       |       |        |
|------|-------|-------|--------|
| 1562 | 17609 | 19799 | 98.19  |
| 1563 | 6146  | 21084 | 258.30 |
| 1564 | 21160 | 27130 | 110.03 |
| 1565 | 6117  | 8881  | 129.03 |
| 1566 | 6115  | 11033 | 157.15 |
| 1567 | 6115  | 8269  | 117.93 |
| 1568 | 8336  | 22342 | 219.87 |
| 1569 | 6107  | 4207  | 58.45  |
| 1570 | 6092  | 30613 | 383.25 |
| 1571 | 9481  | 15020 | 134.81 |
| 1572 | 6069  | 8665  | 120.15 |
| 1573 | 12581 | 9290  | 62.84  |
| 1574 | 7832  | 7434  | 71.47  |
| 1575 | 7720  | 11612 | 121.91 |
| 1576 | 9718  | 31188 | 283.39 |
| 1577 | 6005  | 45018 | 560.41 |
| 1578 | 6005  | 9146  | 136.42 |
| 1579 | 6002  | 6358  | 93.59  |
| 1580 | 5997  | 2781  | 35.81  |
| 1581 | 14259 | 19648 | 121.85 |
| 1582 | 5973  | 6207  | 90.54  |
| 1583 | 5967  | 4394  | 57.14  |
| 1584 | 5940  | 7104  | 106.42 |
| 1585 | 15695 | 38364 | 205.33 |
| 1586 | 9350  | 15763 | 149.82 |
| 1587 | 5920  | 12261 | 151.70 |
| 1588 | 5908  | 21742 | 328.55 |
| 1589 | 5894  | 7282  | 108.33 |
| 1590 | 5884  | 7598  | 116.01 |
| 1591 | 5878  | 12879 | 196.32 |
| 1592 | 5866  | 6268  | 94.20  |
| 1593 | 5862  | 7706  | 114.17 |
| 1594 | 7218  | 11275 | 136.01 |
| 1595 | 5845  | 21744 | 309.46 |
| 1596 | 5845  | 9404  | 119.18 |
| 1597 | 21232 | 26856 | 111.98 |
| 1598 | 5830  | 7008  | 105.99 |
| 1599 | 9843  | 6555  | 56.58  |
| 1600 | 5819  | 5119  | 75.27  |
| 1601 | 5807  | 6701  | 100.82 |
| 1602 | 25026 | 31970 | 112.17 |
| 1603 | 5780  | 16328 | 249.63 |
| 1604 | 10477 | 10572 | 88.27  |
| 1605 | 11421 | 37245 | 268.01 |
| 1606 | 13421 | 16625 | 105.73 |
| 1607 | 5692  | 12652 | 192.47 |
| 1608 | 10089 | 15141 | 134.77 |
| 1609 | 5678  | 7878  | 121.35 |
| 1610 | 5656  | 11651 | 180.22 |
| 1611 | 5644  | 8402  | 134.51 |
| 1612 | 7796  | 8676  | 94.74  |
| 1613 | 5636  | 8265  | 131.30 |
| 1614 | 5604  | 8001  | 128.52 |
| 1615 | 12605 | 14586 | 97.91  |
| 1616 | 5594  | 8218  | 130.84 |
| 1617 | 15580 | 13781 | 76.81  |
| 1618 | 11544 | 42000 | 306.13 |
| 1619 | 8713  | 28786 | 275.99 |
| 1620 | 5532  | 5126  | 79.47  |
| 1621 | 11899 | 15092 | 107.61 |
| 1622 | 5510  | 6455  | 101.40 |
| 1623 | 5499  | 4721  | 76.29  |
| 1624 | 8545  | 8668  | 88.07  |
| 1625 | 5490  | 26002 | 409.00 |
| 1626 | 7647  | 21720 | 242.22 |
| 1627 | 7895  | 9864  | 109.67 |
| 1628 | 5464  | 8059  | 131.42 |
| 1629 | 13465 | 19852 | 130.28 |

|      |       |       |        |
|------|-------|-------|--------|
| 1630 | 5445  | 10321 | 165.37 |
| 1631 | 5423  | 8629  | 138.08 |
| 1632 | 11348 | 14545 | 114.96 |
| 1633 | 5386  | 7267  | 117.73 |
| 1634 | 5377  | 4503  | 71.12  |
| 1635 | 5361  | 16279 | 263.61 |
| 1636 | 5347  | 7762  | 127.70 |
| 1637 | 5337  | 4476  | 72.87  |
| 1638 | 5336  | 7310  | 121.96 |
| 1639 | 5330  | 7458  | 120.45 |
| 1640 | 7811  | 14892 | 159.56 |
| 1641 | 9832  | 11706 | 105.25 |
| 1642 | 5297  | 3594  | 58.48  |
| 1643 | 11257 | 23651 | 178.14 |
| 1644 | 9371  | 12911 | 117.43 |
| 1645 | 5281  | 8339  | 139.57 |
| 1646 | 5279  | 5414  | 87.60  |
| 1647 | 11865 | 38660 | 281.76 |
| 1648 | 5267  | 6066  | 102.53 |
| 1649 | 10527 | 24400 | 193.07 |
| 1650 | 5258  | 1927  | 33.32  |
| 1651 | 5257  | 12637 | 213.92 |
| 1652 | 5253  | 6150  | 100.21 |
| 1653 | 5247  | 6233  | 102.08 |
| 1654 | 8644  | 8221  | 82.06  |
| 1655 | 5211  | 7163  | 122.72 |
| 1656 | 5188  | 5307  | 90.10  |
| 1657 | 16439 | 21002 | 112.82 |
| 1658 | 5179  | 8603  | 137.62 |
| 1659 | 14629 | 19351 | 118.51 |
| 1660 | 5172  | 2898  | 41.87  |
| 1661 | 5168  | 10857 | 185.04 |
| 1662 | 5167  | 7041  | 119.50 |
| 1663 | 5159  | 8545  | 143.49 |
| 1664 | 6439  | 9938  | 136.55 |
| 1665 | 9445  | 27102 | 252.79 |
| 1666 | 5140  | 6564  | 105.36 |
| 1667 | 5134  | 21858 | 358.18 |
| 1668 | 14127 | 19300 | 121.03 |
| 1669 | 5102  | 4851  | 81.32  |
| 1670 | 5097  | 5219  | 88.91  |
| 1671 | 6400  | 6955  | 95.22  |
| 1672 | 9079  | 10999 | 108.13 |
| 1673 | 5065  | 6220  | 110.09 |
| 1674 | 5059  | 8174  | 143.51 |
| 1675 | 5054  | 9097  | 155.12 |
| 1676 | 5050  | 6776  | 120.62 |
| 1677 | 7972  | 9056  | 92.66  |
| 1678 | 8836  | 12805 | 124.67 |
| 1679 | 5019  | 11338 | 185.83 |
| 1680 | 5019  | 7239  | 122.97 |
| 1681 | 4995  | 12296 | 208.40 |
| 1682 | 4994  | 4572  | 79.00  |
| 1683 | 4972  | 21342 | 366.46 |
| 1684 | 4955  | 4376  | 74.68  |
| 1685 | 4906  | 17128 | 232.71 |
| 1686 | 4903  | 7969  | 122.34 |
| 1687 | 4900  | 6575  | 110.87 |
| 1688 | 4889  | 17738 | 298.87 |
| 1689 | 4889  | 9559  | 177.12 |
| 1690 | 12498 | 12633 | 85.27  |
| 1691 | 9108  | 9356  | 90.48  |
| 1692 | 10177 | 22918 | 201.40 |
| 1693 | 4850  | 18543 | 321.62 |
| 1694 | 7647  | 13383 | 152.30 |
| 1695 | 4839  | 9548  | 165.69 |
| 1696 | 4788  | 6551  | 117.26 |
| 1697 | 4762  | 4671  | 86.68  |

|      |       |        |         |
|------|-------|--------|---------|
| 1698 | 7289  | 10113  | 119.25  |
| 1699 | 4757  | 10828  | 195.29  |
| 1700 | 4753  | 7566   | 135.40  |
| 1701 | 4733  | 12093  | 206.88  |
| 1702 | 7831  | 7907   | 85.93   |
| 1703 | 8075  | 9570   | 99.74   |
| 1704 | 9955  | 13176  | 115.21  |
| 1705 | 4673  | 6283   | 108.66  |
| 1706 | 4673  | 5325   | 99.91   |
| 1707 | 4671  | 11178  | 208.80  |
| 1708 | 4648  | 8901   | 165.86  |
| 1709 | 7213  | 7799   | 87.49   |
| 1710 | 4633  | 4833   | 87.31   |
| 1711 | 8053  | 11600  | 124.39  |
| 1712 | 4575  | 2905   | 57.89   |
| 1713 | 4574  | 7812   | 140.22  |
| 1714 | 9272  | 13484  | 124.03  |
| 1715 | 4567  | 3351   | 66.99   |
| 1716 | 4562  | 2262   | 42.28   |
| 1717 | 4562  | 2089   | 36.75   |
| 1718 | 6981  | 11511  | 138.57  |
| 1719 | 4527  | 5900   | 117.32  |
| 1720 | 14029 | 26340  | 151.54  |
| 1721 | 4514  | 13433  | 249.86  |
| 1722 | 6454  | 7153   | 95.04   |
| 1723 | 4472  | 6855   | 136.95  |
| 1724 | 4462  | 10672  | 213.73  |
| 1725 | 6720  | 9009   | 121.02  |
| 1726 | 4446  | 102354 | 1960.69 |
| 1727 | 4435  | 3660   | 71.30   |
| 1728 | 4404  | 47954  | 860.25  |
| 1729 | 4400  | 6456   | 134.07  |
| 1730 | 4398  | 6870   | 140.94  |
| 1731 | 5598  | 4446   | 69.09   |
| 1732 | 4357  | 4014   | 78.91   |
| 1733 | 4352  | 3820   | 72.90   |
| 1734 | 11591 | 16974  | 127.84  |
| 1735 | 8509  | 10528  | 100.40  |
| 1736 | 4321  | 6523   | 116.53  |
| 1737 | 4320  | 4344   | 92.69   |
| 1738 | 4315  | 10850  | 224.46  |
| 1739 | 4288  | 7116   | 142.70  |
| 1740 | 4284  | 2801   | 55.62   |
| 1741 | 4279  | 4448   | 91.84   |
| 1742 | 6470  | 4174   | 53.47   |
| 1743 | 4221  | 6961   | 140.33  |
| 1744 | 13676 | 15607  | 96.84   |
| 1745 | 4200  | 10200  | 208.05  |
| 1746 | 4190  | 14922  | 285.79  |
| 1747 | 4188  | 7748   | 170.03  |
| 1748 | 11053 | 8602   | 64.90   |
| 1749 | 9956  | 19756  | 162.06  |
| 1750 | 4166  | 5419   | 96.83   |
| 1751 | 7096  | 3515   | 41.36   |
| 1752 | 6335  | 6189   | 85.02   |
| 1753 | 7204  | 10610  | 124.46  |
| 1754 | 4131  | 4749   | 103.03  |
| 1755 | 4116  | 3587   | 75.07   |
| 1756 | 4116  | 75497  | 1558.46 |
| 1757 | 4110  | 1572   | 34.55   |
| 1758 | 4105  | 5270   | 113.68  |
| 1759 | 4086  | 8185   | 175.28  |
| 1760 | 4070  | 10460  | 209.10  |
| 1761 | 4067  | 4435   | 90.47   |
| 1762 | 8283  | 9984   | 101.75  |
| 1763 | 4060  | 16541  | 342.52  |
| 1764 | 11654 | 20486  | 146.95  |
| 1765 | 5555  | 16001  | 246.43  |

|      |       |       |         |
|------|-------|-------|---------|
| 1766 | 10810 | 17379 | 138.47  |
| 1767 | 13050 | 22236 | 137.97  |
| 1768 | 4013  | 30321 | 626.36  |
| 1769 | 3998  | 9015  | 192.58  |
| 1770 | 7802  | 10310 | 114.81  |
| 1771 | 12758 | 33694 | 229.27  |
| 1772 | 5828  | 7771  | 117.28  |
| 1773 | 3953  | 15187 | 322.28  |
| 1774 | 3952  | 2450  | 53.48   |
| 1775 | 5197  | 5933  | 98.53   |
| 1776 | 11471 | 14063 | 107.76  |
| 1777 | 3926  | 4962  | 90.54   |
| 1778 | 3925  | 3693  | 80.33   |
| 1779 | 7973  | 7325  | 78.47   |
| 1780 | 9966  | 20370 | 174.69  |
| 1781 | 6823  | 6970  | 79.14   |
| 1782 | 3881  | 7717  | 182.91  |
| 1783 | 5607  | 5761  | 89.42   |
| 1784 | 7348  | 11707 | 142.29  |
| 1785 | 3813  | 9953  | 219.61  |
| 1786 | 3813  | 4438  | 100.41  |
| 1787 | 9753  | 13216 | 115.29  |
| 1788 | 7123  | 6282  | 75.47   |
| 1789 | 6445  | 12684 | 162.00  |
| 1790 | 6209  | 11941 | 162.47  |
| 1791 | 3760  | 3085  | 68.08   |
| 1792 | 3746  | 1635  | 40.17   |
| 1793 | 4958  | 14242 | 236.25  |
| 1794 | 3719  | 6154  | 140.62  |
| 1795 | 3711  | 4086  | 98.10   |
| 1796 | 6829  | 7338  | 93.74   |
| 1797 | 3647  | 6455  | 158.04  |
| 1798 | 8836  | 17230 | 165.07  |
| 1799 | 3634  | 5208  | 128.48  |
| 1800 | 6235  | 8208  | 116.91  |
| 1801 | 3612  | 2993  | 65.81   |
| 1802 | 3607  | 9006  | 221.37  |
| 1803 | 5698  | 10377 | 158.20  |
| 1804 | 3598  | 2993  | 70.44   |
| 1805 | 3596  | 57509 | 1216.19 |
| 1806 | 3596  | 3119  | 73.88   |
| 1807 | 3587  | 10879 | 257.37  |
| 1808 | 9627  | 7439  | 65.38   |
| 1809 | 5279  | 10886 | 176.65  |
| 1810 | 7142  | 6688  | 81.60   |
| 1811 | 6639  | 12101 | 144.76  |
| 1812 | 3539  | 8697  | 218.55  |
| 1813 | 3512  | 6992  | 185.70  |
| 1814 | 3508  | 21191 | 517.58  |
| 1815 | 3508  | 4551  | 114.45  |
| 1816 | 3504  | 6102  | 158.60  |
| 1817 | 3487  | 8733  | 211.35  |
| 1818 | 7203  | 11511 | 143.51  |
| 1819 | 3479  | 9790  | 249.14  |
| 1820 | 3477  | 3967  | 99.02   |
| 1821 | 3470  | 1470  | 37.36   |
| 1822 | 3433  | 4327  | 110.29  |
| 1823 | 5354  | 5336  | 84.02   |
| 1824 | 9045  | 13569 | 125.39  |
| 1825 | 5887  | 13518 | 197.68  |
| 1826 | 3401  | 7513  | 198.01  |
| 1827 | 3393  | 1500  | 40.78   |
| 1828 | 9006  | 12394 | 124.55  |
| 1829 | 3360  | 2877  | 72.51   |
| 1830 | 7058  | 10298 | 121.30  |
| 1831 | 3352  | 6061  | 137.06  |
| 1832 | 3340  | 4477  | 120.69  |
| 1833 | 3337  | 9355  | 238.07  |

|      |       |       |        |
|------|-------|-------|--------|
| 1834 | 3333  | 3779  | 94.46  |
| 1835 | 3326  | 5480  | 149.29 |
| 1836 | 3324  | 26037 | 668.94 |
| 1837 | 5196  | 6783  | 113.41 |
| 1838 | 4814  | 3778  | 64.16  |
| 1839 | 3308  | 4386  | 119.00 |
| 1840 | 6328  | 8151  | 116.47 |
| 1841 | 5506  | 7508  | 122.64 |
| 1842 | 3300  | 4415  | 120.12 |
| 1843 | 3296  | 6234  | 154.47 |
| 1844 | 12839 | 25191 | 156.88 |
| 1845 | 5890  | 6929  | 105.00 |
| 1846 | 3286  | 3328  | 87.14  |
| 1847 | 3272  | 8158  | 221.93 |
| 1848 | 7177  | 5613  | 65.54  |
| 1849 | 3248  | 2177  | 55.25  |
| 1850 | 5478  | 16313 | 259.90 |
| 1851 | 3224  | 1437  | 39.16  |
| 1852 | 3224  | 1636  | 41.12  |
| 1853 | 3195  | 5769  | 152.73 |
| 1854 | 3181  | 1415  | 39.74  |
| 1855 | 3174  | 7001  | 184.75 |
| 1856 | 3168  | 2167  | 49.81  |
| 1857 | 3155  | 3035  | 81.78  |
| 1858 | 3136  | 9366  | 258.68 |
| 1859 | 7269  | 13832 | 166.64 |
| 1860 | 3126  | 1836  | 53.48  |
| 1861 | 3124  | 2559  | 70.23  |
| 1862 | 8722  | 13567 | 138.57 |
| 1863 | 5880  | 10247 | 154.53 |
| 1864 | 3089  | 4680  | 135.34 |
| 1865 | 7840  | 9510  | 102.65 |
| 1866 | 7649  | 38053 | 416.14 |
| 1867 | 3048  | 1572  | 42.12  |
| 1868 | 3043  | 5382  | 148.68 |
| 1869 | 3024  | 2781  | 72.90  |
| 1870 | 5734  | 6425  | 99.77  |
| 1871 | 3006  | 1140  | 34.81  |
| 1872 | 2990  | 3294  | 94.47  |
| 1873 | 2981  | 16733 | 444.53 |
| 1874 | 2977  | 8417  | 254.72 |
| 1875 | 2968  | 10509 | 314.00 |
| 1876 | 5404  | 10406 | 160.05 |
| 1877 | 4869  | 10103 | 180.22 |
| 1878 | 2943  | 3114  | 93.24  |
| 1879 | 2937  | 27975 | 717.42 |
| 1880 | 2929  | 2201  | 60.79  |
| 1881 | 2921  | 4419  | 138.76 |
| 1882 | 2915  | 6187  | 172.56 |
| 1883 | 2913  | 3699  | 108.89 |
| 1884 | 2902  | 3054  | 78.80  |
| 1885 | 2899  | 2348  | 68.66  |
| 1886 | 2895  | 3753  | 116.33 |
| 1887 | 5012  | 15735 | 268.85 |
| 1888 | 5632  | 9789  | 140.95 |
| 1889 | 2860  | 21097 | 581.10 |
| 1890 | 6210  | 6823  | 96.95  |
| 1891 | 5342  | 4811  | 78.62  |
| 1892 | 2854  | 6812  | 205.64 |
| 1893 | 2849  | 15833 | 417.14 |
| 1894 | 2848  | 1674  | 50.65  |
| 1895 | 2848  | 8438  | 215.52 |
| 1896 | 2842  | 5349  | 170.03 |
| 1897 | 4155  | 4978  | 100.07 |
| 1898 | 2825  | 3959  | 119.36 |
| 1899 | 2823  | 3184  | 96.49  |
| 1900 | 2813  | 3915  | 119.76 |
| 1901 | 7789  | 9103  | 99.27  |

|      |      |       |        |
|------|------|-------|--------|
| 1902 | 2801 | 2685  | 84.39  |
| 1903 | 4524 | 6243  | 115.21 |
| 1904 | 2780 | 4190  | 135.26 |
| 1905 | 2775 | 3463  | 101.66 |
| 1906 | 2763 | 11899 | 351.09 |
| 1907 | 2763 | 3227  | 103.68 |
| 1908 | 2755 | 2353  | 77.24  |
| 1909 | 2753 | 2159  | 67.51  |
| 1910 | 2751 | 3151  | 99.87  |
| 1911 | 2749 | 1843  | 52.92  |
| 1912 | 2740 | 3322  | 106.81 |
| 1913 | 2733 | 17652 | 537.18 |
| 1914 | 5465 | 7462  | 112.95 |
| 1915 | 2721 | 6431  | 209.99 |
| 1916 | 2719 | 4799  | 161.68 |
| 1917 | 2719 | 3617  | 120.01 |
| 1918 | 2713 | 3429  | 109.14 |
| 1919 | 2712 | 3887  | 126.02 |
| 1920 | 4170 | 6567  | 137.96 |
| 1921 | 2701 | 18353 | 492.30 |
| 1922 | 2691 | 8034  | 248.35 |
| 1923 | 2679 | 3226  | 103.71 |
| 1924 | 6120 | 4631  | 60.72  |
| 1925 | 2670 | 2586  | 82.84  |
| 1926 | 2664 | 2603  | 84.24  |
| 1927 | 2664 | 2098  | 63.43  |
| 1928 | 7065 | 16555 | 204.55 |
| 1929 | 2659 | 18139 | 596.46 |
| 1930 | 2652 | 2606  | 84.88  |
| 1931 | 9734 | 12144 | 106.98 |
| 1932 | 2646 | 3221  | 105.31 |
| 1933 | 2643 | 4235  | 145.81 |
| 1934 | 4299 | 5516  | 111.57 |
| 1935 | 2631 | 3232  | 103.34 |
| 1936 | 4276 | 7622  | 153.01 |
| 1937 | 2607 | 2675  | 88.69  |
| 1938 | 4912 | 7409  | 116.01 |
| 1939 | 2596 | 3561  | 116.68 |
| 1940 | 2593 | 1057  | 37.15  |
| 1941 | 4295 | 14211 | 276.71 |
| 1942 | 2578 | 5914  | 204.65 |
| 1943 | 2576 | 7457  | 249.64 |
| 1944 | 5031 | 10658 | 174.88 |
| 1945 | 4728 | 4295  | 80.46  |
| 1946 | 2549 | 2768  | 96.90  |
| 1947 | 4654 | 4380  | 83.08  |
| 1948 | 8436 | 7401  | 74.00  |
| 1949 | 2543 | 1787  | 49.08  |
| 1950 | 2536 | 3508  | 116.63 |
| 1951 | 2532 | 3925  | 135.46 |
| 1952 | 2530 | 1447  | 50.99  |
| 1953 | 3626 | 4939  | 116.75 |
| 1954 | 7447 | 10312 | 118.20 |
| 1955 | 8374 | 20566 | 215.54 |
| 1956 | 2524 | 4208  | 144.92 |
| 1957 | 5259 | 9446  | 150.59 |
| 1958 | 2520 | 2300  | 75.41  |
| 1959 | 2518 | 7370  | 216.02 |
| 1960 | 2516 | 4205  | 153.47 |
| 1961 | 2510 | 2946  | 102.24 |
| 1962 | 2508 | 1049  | 34.94  |
| 1963 | 2504 | 8922  | 298.78 |
| 1964 | 2503 | 4443  | 156.66 |
| 1965 | 2499 | 7974  | 272.51 |
| 1966 | 2499 | 14170 | 467.72 |
| 1967 | 2499 | 3895  | 105.40 |
| 1968 | 2498 | 4587  | 157.16 |
| 1969 | 2479 | 2456  | 87.13  |

|      |      |       |        |
|------|------|-------|--------|
| 1970 | 2478 | 10274 | 359.71 |
| 1971 | 2432 | 3602  | 135.45 |
| 1972 | 2421 | 2766  | 99.70  |
| 1973 | 2411 | 4109  | 133.97 |
| 1974 | 2409 | 6941  | 247.04 |
| 1975 | 2403 | 1102  | 35.87  |
| 1976 | 2399 | 1317  | 48.46  |
| 1977 | 2397 | 3306  | 122.48 |
| 1978 | 3851 | 5010  | 109.60 |
| 1979 | 2389 | 4393  | 159.11 |
| 1980 | 2371 | 1424  | 48.76  |
| 1981 | 2370 | 3805  | 141.53 |
| 1982 | 2366 | 2515  | 91.05  |
| 1983 | 2341 | 10243 | 370.89 |
| 1984 | 2340 | 2679  | 101.73 |
| 1985 | 2334 | 1667  | 60.58  |
| 1986 | 3812 | 8837  | 204.83 |
| 1987 | 2311 | 2867  | 108.79 |
| 1988 | 2301 | 1793  | 62.73  |
| 1989 | 2289 | 2986  | 119.42 |
| 1990 | 2277 | 1089  | 40.09  |
| 1991 | 2277 | 2205  | 83.16  |
| 1992 | 2274 | 4611  | 172.44 |
| 1993 | 4163 | 5138  | 110.38 |
| 1994 | 2254 | 2171  | 85.85  |
| 1995 | 2245 | 4654  | 167.14 |
| 1996 | 3983 | 4901  | 100.06 |
| 1997 | 4057 | 8763  | 191.07 |
| 1998 | 2225 | 5348  | 213.64 |
| 1999 | 2220 | 3338  | 130.28 |
| 2000 | 2218 | 2546  | 98.66  |
| 2001 | 4462 | 20905 | 389.02 |
| 2002 | 2215 | 1570  | 63.00  |
| 2003 | 2211 | 3679  | 123.97 |
| 2004 | 2203 | 6571  | 265.62 |
| 2005 | 2200 | 5260  | 194.42 |
| 2006 | 2194 | 8775  | 330.41 |
| 2007 | 3910 | 3054  | 66.01  |
| 2008 | 2190 | 8086  | 306.73 |
| 2009 | 2185 | 2795  | 105.53 |
| 2010 | 4322 | 11903 | 229.81 |
| 2011 | 2174 | 3324  | 137.85 |
| 2012 | 2173 | 2726  | 107.53 |
| 2013 | 2172 | 3478  | 134.05 |
| 2014 | 2160 | 2189  | 85.70  |
| 2015 | 2159 | 4384  | 165.62 |
| 2016 | 2150 | 5315  | 220.29 |
| 2017 | 2147 | 2458  | 103.89 |
| 2018 | 2136 | 5510  | 223.54 |
| 2019 | 2127 | 10708 | 349.31 |
| 2020 | 2127 | 5381  | 206.81 |
| 2021 | 2117 | 3640  | 135.90 |
| 2022 | 2117 | 4041  | 156.93 |
| 2023 | 2113 | 1697  | 69.09  |
| 2024 | 4468 | 5385  | 101.93 |
| 2025 | 2105 | 3771  | 163.76 |
| 2026 | 2098 | 3280  | 118.30 |
| 2027 | 4477 | 7991  | 150.54 |
| 2028 | 2090 | 3508  | 131.01 |
| 2029 | 2088 | 4463  | 188.13 |
| 2030 | 2085 | 6054  | 237.47 |
| 2031 | 2084 | 1370  | 56.51  |
| 2032 | 2081 | 4186  | 155.92 |
| 2033 | 2074 | 2165  | 90.34  |
| 2034 | 2055 | 2528  | 109.20 |
| 2035 | 2053 | 7398  | 296.17 |
| 2036 | 2044 | 13797 | 589.54 |
| 2037 | 3763 | 5618  | 132.18 |

|      |      |       |        |
|------|------|-------|--------|
| 2038 | 2038 | 4153  | 183.48 |
| 2039 | 2037 | 3094  | 133.39 |
| 2040 | 2027 | 7557  | 269.86 |
| 2041 | 2026 | 5888  | 254.27 |
| 2042 | 2016 | 5352  | 230.09 |
| 2043 | 2016 | 16879 | 570.89 |
| 2044 | 2013 | 6580  | 288.79 |
| 2045 | 2012 | 4018  | 158.52 |
| 2046 | 5295 | 6621  | 103.82 |
| 2047 | 2007 | 687   | 30.40  |
| 2048 | 2007 | 3655  | 149.84 |
| 2049 | 2006 | 3948  | 163.92 |
| 2050 | 1997 | 1792  | 82.31  |
| 2051 | 1995 | 1383  | 63.70  |
| 2052 | 6509 | 6157  | 83.09  |
| 2053 | 1986 | 15571 | 699.95 |
| 2054 | 1977 | 3440  | 142.02 |
| 2055 | 1973 | 3021  | 130.27 |
| 2056 | 1973 | 2984  | 131.09 |
| 2057 | 1969 | 4566  | 206.26 |
| 2058 | 1955 | 6840  | 306.77 |
| 2059 | 1952 | 3869  | 160.69 |
| 2060 | 1951 | 4613  | 194.38 |
| 2061 | 5716 | 6714  | 98.78  |
| 2062 | 1948 | 2694  | 104.32 |
| 2063 | 1946 | 1600  | 63.15  |
| 2064 | 1939 | 5352  | 205.78 |
| 2065 | 1937 | 2596  | 118.74 |
| 2066 | 1930 | 3422  | 160.93 |
| 2067 | 1911 | 1354  | 60.85  |
| 2068 | 3669 | 8283  | 199.17 |
| 2069 | 1900 | 901   | 41.15  |
| 2070 | 1900 | 6183  | 274.52 |
| 2071 | 1896 | 2156  | 97.38  |
| 2072 | 1884 | 1733  | 80.18  |
| 2073 | 1880 | 3451  | 159.55 |
| 2074 | 1874 | 4670  | 221.96 |
| 2075 | 5785 | 10127 | 148.24 |
| 2076 | 1866 | 1917  | 85.95  |
| 2077 | 1865 | 1229  | 54.27  |
| 2078 | 1853 | 10234 | 407.75 |
| 2079 | 1852 | 4290  | 203.02 |
| 2080 | 1848 | 3867  | 178.68 |
| 2081 | 1847 | 2574  | 115.14 |
| 2082 | 1846 | 6223  | 282.54 |
| 2083 | 1844 | 6155  | 275.21 |
| 2084 | 1834 | 3400  | 147.29 |
| 2085 | 1833 | 1091  | 47.66  |
| 2086 | 1832 | 4099  | 180.94 |
| 2087 | 1828 | 3598  | 148.83 |
| 2088 | 1824 | 4165  | 163.90 |
| 2089 | 1824 | 8661  | 392.66 |
| 2090 | 1823 | 5648  | 262.70 |
| 2091 | 1820 | 695   | 33.81  |
| 2092 | 1820 | 2531  | 123.09 |
| 2093 | 1818 | 1712  | 80.37  |
| 2094 | 1814 | 2792  | 139.88 |
| 2095 | 1814 | 1978  | 95.09  |
| 2096 | 3306 | 8769  | 235.38 |
| 2097 | 1809 | 2280  | 112.69 |
| 2098 | 1809 | 3379  | 165.29 |
| 2099 | 1806 | 4334  | 204.00 |
| 2100 | 1805 | 3096  | 156.80 |
| 2101 | 1797 | 2004  | 98.59  |
| 2102 | 1793 | 2614  | 66.74  |
| 2103 | 1792 | 3670  | 171.97 |
| 2104 | 1792 | 1846  | 88.89  |
| 2105 | 1791 | 932   | 44.47  |



|      |      |       |        |
|------|------|-------|--------|
| 2106 | 1789 | 1596  | 76.35  |
| 2107 | 1787 | 4355  | 215.16 |
| 2108 | 1786 | 764   | 38.34  |
| 2109 | 1780 | 4852  | 246.29 |
| 2110 | 1780 | 5759  | 247.47 |
| 2111 | 1770 | 6066  | 265.86 |
| 2112 | 1769 | 725   | 37.59  |
| 2113 | 1754 | 19872 | 869.89 |
| 2114 | 1753 | 4517  | 221.45 |
| 2115 | 1751 | 882   | 44.88  |
| 2116 | 1747 | 1483  | 72.99  |
| 2117 | 1747 | 6668  | 265.57 |
| 2118 | 1735 | 3676  | 195.37 |
| 2119 | 1724 | 1117  | 56.06  |
| 2120 | 1716 | 3899  | 198.36 |
| 2121 | 1712 | 1818  | 89.72  |
| 2122 | 1707 | 2347  | 120.18 |
| 2123 | 1704 | 2022  | 100.55 |
| 2124 | 1704 | 2393  | 125.54 |
| 2125 | 1699 | 4088  | 202.61 |
| 2126 | 1696 | 1032  | 50.73  |
| 2127 | 1692 | 5350  | 270.90 |
| 2128 | 1691 | 11375 | 449.25 |
| 2129 | 1690 | 727   | 37.96  |
| 2130 | 3914 | 3493  | 76.40  |
| 2131 | 1680 | 4507  | 235.60 |
| 2132 | 1679 | 5975  | 286.47 |
| 2133 | 1656 | 1450  | 71.92  |
| 2134 | 1652 | 2026  | 108.46 |
| 2135 | 1652 | 7126  | 347.21 |
| 2136 | 1649 | 1549  | 78.60  |
| 2137 | 3448 | 2682  | 66.40  |
| 2138 | 1646 | 3292  | 169.22 |
| 2139 | 1644 | 2192  | 113.58 |
| 2140 | 1638 | 1932  | 104.79 |
| 2141 | 1636 | 9083  | 368.57 |
| 2142 | 1632 | 10333 | 529.54 |
| 2143 | 1631 | 907   | 38.87  |
| 2144 | 1620 | 3453  | 179.00 |
| 2145 | 1615 | 881   | 45.76  |
| 2146 | 1607 | 3333  | 172.79 |
| 2147 | 1592 | 2892  | 157.28 |
| 2148 | 1588 | 783   | 43.24  |
| 2149 | 1586 | 586   | 33.70  |
| 2150 | 1580 | 1736  | 87.36  |
| 2151 | 1567 | 3074  | 161.50 |
| 2152 | 3056 | 6013  | 166.92 |
| 2153 | 1556 | 1221  | 68.76  |
| 2154 | 1544 | 1135  | 66.08  |
| 2155 | 1542 | 2706  | 157.59 |
| 2156 | 1542 | 3724  | 180.12 |
| 2157 | 3207 | 2250  | 60.04  |
| 2158 | 1541 | 683   | 35.23  |
| 2159 | 1540 | 7087  | 370.94 |
| 2160 | 2962 | 11140 | 285.76 |
| 2161 | 1539 | 1311  | 41.19  |
| 2162 | 1538 | 1121  | 62.08  |
| 2163 | 1535 | 3377  | 179.66 |
| 2164 | 2796 | 5210  | 160.99 |
| 2165 | 1522 | 940   | 50.87  |
| 2166 | 1521 | 1103  | 63.41  |
| 2167 | 1517 | 853   | 46.11  |
| 2168 | 1513 | 1110  | 48.99  |
| 2169 | 1512 | 2518  | 153.29 |
| 2170 | 1509 | 1972  | 116.27 |
| 2171 | 1506 | 3481  | 211.34 |
| 2172 | 1506 | 3870  | 174.87 |
| 2173 | 1503 | 2495  | 153.51 |

|      |      |       |         |
|------|------|-------|---------|
| 2174 | 1503 | 1223  | 64.44   |
| 2175 | 1499 | 2151  | 124.08  |
| 2176 | 1495 | 3612  | 192.72  |
| 2177 | 1493 | 10493 | 550.67  |
| 2178 | 3138 | 2304  | 61.80   |
| 2179 | 1488 | 2442  | 144.17  |
| 2180 | 1487 | 689   | 37.82   |
| 2181 | 1479 | 2878  | 158.48  |
| 2182 | 1476 | 1669  | 99.55   |
| 2183 | 1476 | 1398  | 83.29   |
| 2184 | 1473 | 9441  | 496.72  |
| 2185 | 1471 | 1307  | 77.74   |
| 2186 | 1471 | 1765  | 107.95  |
| 2187 | 1466 | 4950  | 286.09  |
| 2188 | 1464 | 583   | 31.78   |
| 2189 | 1459 | 15454 | 962.76  |
| 2190 | 1458 | 5763  | 330.55  |
| 2191 | 1454 | 2936  | 171.64  |
| 2192 | 1451 | 1730  | 101.38  |
| 2193 | 1446 | 10726 | 642.67  |
| 2194 | 1437 | 5155  | 334.42  |
| 2195 | 1437 | 2031  | 127.31  |
| 2196 | 1436 | 3060  | 189.20  |
| 2197 | 1431 | 2518  | 146.67  |
| 2198 | 1428 | 22222 | 1093.66 |
| 2199 | 1426 | 3753  | 208.77  |
| 2200 | 1424 | 1555  | 92.12   |
| 2201 | 1422 | 1603  | 81.37   |
| 2202 | 1420 | 1195  | 67.88   |
| 2203 | 1413 | 1792  | 104.16  |
| 2204 | 1412 | 2018  | 123.80  |
| 2205 | 1406 | 1760  | 114.66  |
| 2206 | 1401 | 2805  | 132.60  |
| 2207 | 1389 | 3365  | 172.68  |
| 2208 | 1378 | 1759  | 105.89  |
| 2209 | 1378 | 1662  | 104.81  |
| 2210 | 1374 | 1108  | 66.87   |
| 2211 | 1372 | 911   | 57.48   |
| 2212 | 1366 | 6239  | 365.20  |
| 2213 | 3113 | 5813  | 152.65  |
| 2214 | 1359 | 2060  | 131.29  |
| 2215 | 1352 | 1320  | 86.22   |
| 2216 | 1350 | 4188  | 228.95  |
| 2217 | 1345 | 1585  | 106.11  |
| 2218 | 1342 | 1315  | 85.98   |
| 2219 | 1334 | 1185  | 57.23   |
| 2220 | 1329 | 1409  | 92.35   |
| 2221 | 1327 | 2086  | 144.74  |
| 2222 | 1321 | 5931  | 397.85  |
| 2223 | 1320 | 816   | 52.11   |
| 2224 | 1314 | 2001  | 127.65  |
| 2225 | 1310 | 537   | 33.34   |
| 2226 | 1304 | 2778  | 173.56  |
| 2227 | 1295 | 3064  | 197.55  |
| 2228 | 1293 | 631   | 42.30   |
| 2229 | 1291 | 1488  | 96.92   |
| 2230 | 1291 | 2494  | 170.31  |
| 2231 | 1286 | 1500  | 103.10  |
| 2232 | 1285 | 1272  | 83.52   |
| 2233 | 1274 | 8878  | 565.03  |
| 2234 | 1269 | 3698  | 252.52  |
| 2235 | 1266 | 1557  | 106.71  |
| 2236 | 1266 | 2370  | 164.82  |
| 2237 | 1265 | 4021  | 273.47  |
| 2238 | 1265 | 720   | 47.68   |
| 2239 | 1263 | 1408  | 99.29   |
| 2240 | 1261 | 2122  | 140.95  |
| 2241 | 1260 | 719   | 46.93   |

|      |      |       |         |
|------|------|-------|---------|
| 2242 | 1260 | 1025  | 71.96   |
| 2243 | 1260 | 5701  | 321.03  |
| 2244 | 1260 | 1228  | 84.49   |
| 2245 | 1252 | 914   | 62.25   |
| 2246 | 1251 | 1430  | 94.89   |
| 2247 | 1251 | 1555  | 97.43   |
| 2248 | 1244 | 972   | 67.13   |
| 2249 | 1236 | 1439  | 81.86   |
| 2250 | 1233 | 1400  | 97.63   |
| 2251 | 1228 | 1010  | 71.38   |
| 2252 | 1223 | 3920  | 268.61  |
| 2253 | 1223 | 914   | 62.40   |
| 2254 | 1219 | 2082  | 128.05  |
| 2255 | 1215 | 9340  | 634.71  |
| 2256 | 1209 | 2710  | 201.32  |
| 2257 | 1201 | 1796  | 131.93  |
| 2258 | 1201 | 664   | 40.29   |
| 2259 | 1197 | 22221 | 1397.97 |
| 2260 | 1195 | 11356 | 796.39  |
| 2261 | 1195 | 3653  | 261.35  |
| 2262 | 1193 | 5157  | 344.73  |
| 2263 | 1192 | 2096  | 162.37  |
| 2264 | 1190 | 3803  | 285.16  |
| 2265 | 1186 | 526   | 39.28   |
| 2266 | 1184 | 4162  | 272.68  |
| 2267 | 1182 | 2379  | 170.66  |
| 2268 | 1181 | 613   | 47.48   |
| 2269 | 1176 | 1666  | 109.06  |
| 2270 | 1176 | 494   | 36.65   |
| 2271 | 1172 | 2497  | 188.99  |
| 2272 | 1167 | 2183  | 153.93  |
| 2273 | 1166 | 806   | 57.20   |
| 2274 | 1160 | 4529  | 328.86  |
| 2275 | 1160 | 556   | 40.52   |
| 2276 | 1157 | 6990  | 417.25  |
| 2277 | 1148 | 3590  | 268.80  |
| 2278 | 1148 | 1102  | 80.72   |
| 2279 | 1144 | 2654  | 193.27  |
| 2280 | 1143 | 3620  | 253.71  |
| 2281 | 1142 | 1942  | 142.57  |
| 2282 | 1140 | 4186  | 323.29  |
| 2283 | 1139 | 1171  | 87.12   |
| 2284 | 1129 | 1649  | 130.72  |
| 2285 | 1129 | 2314  | 183.67  |
| 2286 | 1127 | 617   | 42.96   |
| 2287 | 1123 | 1597  | 129.72  |
| 2288 | 1120 | 2968  | 215.89  |
| 2289 | 1120 | 2451  | 196.36  |
| 2290 | 1120 | 1298  | 102.83  |
| 2291 | 1119 | 1049  | 77.45   |
| 2292 | 1118 | 1020  | 79.23   |
| 2293 | 1111 | 6980  | 560.47  |
| 2294 | 1110 | 7208  | 498.55  |
| 2295 | 1108 | 780   | 60.84   |
| 2296 | 1107 | 1312  | 97.37   |
| 2297 | 1105 | 836   | 61.91   |
| 2298 | 1102 | 494   | 36.50   |
| 2299 | 1100 | 3733  | 300.60  |
| 2300 | 1100 | 1304  | 98.05   |
| 2301 | 1093 | 2027  | 151.02  |
| 2302 | 1091 | 5648  | 432.82  |
| 2303 | 1087 | 7977  | 584.36  |
| 2304 | 1085 | 3052  | 246.75  |
| 2305 | 1084 | 612   | 48.58   |
| 2306 | 1082 | 1783  | 149.23  |
| 2307 | 1082 | 1492  | 126.44  |
| 2308 | 1077 | 819   | 61.90   |
| 2309 | 1075 | 4630  | 371.60  |

|      |      |      |        |
|------|------|------|--------|
| 2310 | 1074 | 506  | 38.68  |
| 2311 | 1073 | 3926 | 251.18 |
| 2312 | 1071 | 1486 | 92.91  |
| 2313 | 1070 | 2932 | 217.80 |
| 2314 | 1066 | 918  | 72.42  |
| 2315 | 1065 | 5891 | 428.48 |
| 2316 | 1063 | 1573 | 135.02 |
| 2317 | 1062 | 862  | 70.40  |
| 2318 | 1056 | 937  | 76.89  |
| 2319 | 1051 | 2674 | 210.43 |
| 2320 | 1050 | 702  | 53.76  |
| 2321 | 1048 | 3318 | 269.25 |
| 2322 | 1046 | 582  | 49.22  |
| 2323 | 1041 | 2215 | 172.22 |
| 2324 | 1039 | 1793 | 139.81 |
| 2325 | 1038 | 583  | 46.31  |
| 2326 | 1037 | 720  | 61.68  |
| 2327 | 1036 | 2020 | 177.99 |
| 2328 | 1036 | 510  | 41.78  |
| 2329 | 1034 | 6195 | 541.34 |
| 2330 | 1033 | 3245 | 254.82 |
| 2331 | 1026 | 1082 | 89.86  |
| 2332 | 1023 | 705  | 57.65  |
| 2333 | 1021 | 1023 | 87.93  |
| 2334 | 1021 | 978  | 63.09  |
| 2335 | 1020 | 8950 | 786.60 |
| 2336 | 1017 | 2096 | 183.84 |
| 2337 | 1017 | 1331 | 114.41 |
| 2338 | 1016 | 937  | 78.10  |
| 2339 | 1015 | 1135 | 98.94  |
| 2340 | 1012 | 2209 | 181.93 |
| 2341 | 1011 | 796  | 70.78  |
| 2342 | 1011 | 1039 | 90.90  |
| 2343 | 1010 | 1723 | 155.46 |
| 2344 | 1008 | 709  | 57.06  |
| 2345 | 1008 | 4275 | 296.90 |
| 2346 | 1007 | 2291 | 188.91 |
| 2347 | 1006 | 3452 | 267.78 |
| 2348 | 1005 | 1250 | 110.14 |
| 2349 | 1002 | 6935 | 560.26 |
| 2350 | 1001 | 1436 | 125.15 |
| 2351 | 1000 | 390  | 32.47  |

--- mate-pair data mapping results ---

General info:

```

Program name      clc_mapper
Program version   5.0.4.161845-201706141024
Program parameters -d Amoebophrya.scaffolds.fa -p bf ee 1300 3100 -q -i pe_read_1.fq
pe_read_2.fq -o mapping_MP3kb_data.cas -r ignore

```

Contig files:

```
Amoebophrya.scaffolds.fa [ 2351 / 87690817 ]
```

Read files:

```
pe_read_1.fq interleaved with pe_read_2.fq [ 82141738 / 7190181895 ] <paired>
```

Read info:

|                 |          |         |
|-----------------|----------|---------|
| Contigs         | 2351     |         |
| Reads           | 82141738 |         |
| Unmapped reads  | 18748979 | 22.83 % |
| Mapped reads    | 63392759 | 77.17 % |
| Multi hit reads | 0        | 0.00 %  |

|                  |          |          |
|------------------|----------|----------|
| Mapped as paired | 82141738 | 100.00 % |
| Paired           | 39413080 | 47.98 %  |
| Multi hit reads  | 0        | 0.00 %   |
| Unpaired         | 42728658 | 52.02 %  |
| Multi hit reads  | 0        | 0.00 %   |

Paired end info:

|                         |             |         |
|-------------------------|-------------|---------|
| Paired reads            | 39413080    | 47.98 % |
| Average distance        | 2008.11     |         |
| 99.9 % of pairs between | 1301 - 3098 |         |
| 99.0 % of pairs between | 1308 - 3070 |         |
| 95.0 % of pairs between | 1340 - 2965 |         |
| Unpaired reads          | 42728658    | 52.02 % |
| Both seqs not matching  | 15554444    | 36.40 % |
| One seq not mathing     | 6389070     | 14.95 % |
| Both seqs matching      | 20785144    | 48.64 % |
| Different contigs       | 8156066     | 39.24 % |
| Wrong directions        | 786078      | 3.78 %  |
| Too close               | 9249614     | 44.50 % |
| Too far                 | 2593386     | 12.48 % |

Coverage info:

|                    |            |         |
|--------------------|------------|---------|
| Mapped nucleotides | 5439460667 | 75.65 % |
| Total sites        | 87690817   |         |
| Average coverage   | 62.03      |         |

Contig info:

| Contig | Sites  | Reads  | Coverage |
|--------|--------|--------|----------|
| 1      | 536766 | 367279 | 59.04    |
| 2      | 333242 | 220655 | 57.18    |
| 3      | 232214 | 153996 | 57.28    |
| 4      | 215172 | 138137 | 55.17    |
| 5      | 173237 | 209748 | 104.83   |
| 6      | 323084 | 209709 | 55.95    |
| 7      | 161939 | 106499 | 56.73    |
| 8      | 166220 | 103088 | 52.70    |
| 9      | 268366 | 174037 | 55.94    |
| 10     | 324791 | 210539 | 55.84    |
| 11     | 188472 | 128109 | 58.63    |
| 12     | 153463 | 98191  | 54.99    |
| 13     | 317780 | 209258 | 56.81    |
| 14     | 111583 | 79023  | 61.27    |
| 15     | 219690 | 139725 | 54.97    |
| 16     | 139012 | 92133  | 57.19    |
| 17     | 126789 | 83091  | 56.61    |
| 18     | 175422 | 118879 | 58.40    |
| 19     | 328227 | 220227 | 58.03    |
| 20     | 145226 | 97371  | 57.92    |
| 21     | 276268 | 200056 | 62.18    |
| 22     | 114060 | 77808  | 59.12    |
| 23     | 127126 | 83010  | 56.21    |
| 24     | 130106 | 87166  | 57.91    |
| 25     | 93494  | 63633  | 59.13    |
| 26     | 318924 | 212624 | 57.50    |
| 27     | 141906 | 91194  | 55.40    |
| 28     | 98310  | 63441  | 55.70    |
| 29     | 159638 | 102351 | 55.05    |
| 30     | 148439 | 96531  | 55.96    |
| 31     | 175880 | 115828 | 56.84    |
| 32     | 406243 | 271805 | 57.52    |
| 33     | 85953  | 56211  | 56.34    |
| 34     | 147081 | 102462 | 60.11    |
| 35     | 146507 | 113363 | 66.21    |
| 36     | 175363 | 159614 | 78.48    |

|     |        |        |        |
|-----|--------|--------|--------|
| 37  | 365549 | 444244 | 104.83 |
| 38  | 254965 | 168285 | 56.82  |
| 39  | 248039 | 175190 | 61.01  |
| 40  | 124202 | 80586  | 56.21  |
| 41  | 93992  | 71915  | 65.43  |
| 42  | 202498 | 127846 | 54.43  |
| 43  | 248522 | 173101 | 60.03  |
| 44  | 86540  | 57348  | 57.08  |
| 45  | 78758  | 53482  | 58.71  |
| 46  | 102561 | 69996  | 58.94  |
| 47  | 133237 | 77445  | 50.18  |
| 48  | 127890 | 81403  | 54.94  |
| 49  | 163722 | 108436 | 57.16  |
| 50  | 396561 | 262837 | 57.13  |
| 51  | 134357 | 84513  | 54.10  |
| 52  | 182822 | 125246 | 58.99  |
| 53  | 213816 | 137414 | 55.30  |
| 54  | 276801 | 186152 | 58.15  |
| 55  | 74863  | 55441  | 62.05  |
| 56  | 183255 | 125802 | 58.85  |
| 57  | 192449 | 122846 | 55.14  |
| 58  | 129925 | 86129  | 56.89  |
| 59  | 133584 | 90100  | 58.24  |
| 60  | 168647 | 115555 | 59.21  |
| 61  | 182461 | 128138 | 60.65  |
| 62  | 346043 | 224868 | 56.12  |
| 63  | 265770 | 171419 | 55.75  |
| 64  | 96992  | 68828  | 60.92  |
| 65  | 73262  | 46789  | 55.04  |
| 66  | 90729  | 61223  | 58.35  |
| 67  | 127927 | 88616  | 59.98  |
| 68  | 105516 | 72253  | 58.91  |
| 69  | 150794 | 98797  | 56.43  |
| 70  | 174420 | 115568 | 57.42  |
| 71  | 67344  | 44798  | 57.68  |
| 72  | 145008 | 100328 | 59.56  |
| 73  | 90217  | 80900  | 77.20  |
| 74  | 160745 | 101899 | 54.53  |
| 75  | 178948 | 117036 | 56.38  |
| 76  | 93794  | 66518  | 61.20  |
| 77  | 196790 | 137902 | 60.29  |
| 78  | 100835 | 64602  | 55.25  |
| 79  | 139123 | 86666  | 53.62  |
| 80  | 92482  | 68247  | 64.06  |
| 81  | 99116  | 67583  | 58.98  |
| 82  | 108039 | 72798  | 57.48  |
| 83  | 158276 | 104574 | 56.91  |
| 84  | 177955 | 122535 | 59.65  |
| 85  | 69886  | 45786  | 56.04  |
| 86  | 297654 | 237169 | 68.45  |
| 87  | 126844 | 87593  | 59.31  |
| 88  | 63556  | 42297  | 57.54  |
| 89  | 63357  | 41854  | 56.70  |
| 90  | 117765 | 80209  | 59.16  |
| 91  | 81292  | 57666  | 61.11  |
| 92  | 71870  | 49636  | 59.81  |
| 93  | 187125 | 124559 | 57.01  |
| 94  | 62206  | 43333  | 60.18  |
| 95  | 291740 | 192328 | 56.78  |
| 96  | 124252 | 81241  | 56.50  |
| 97  | 117782 | 118393 | 86.52  |
| 98  | 83445  | 63054  | 65.05  |
| 99  | 105258 | 71104  | 57.62  |
| 100 | 100525 | 76461  | 66.68  |
| 101 | 61657  | 42212  | 59.05  |
| 102 | 76090  | 55380  | 62.91  |
| 103 | 82173  | 52186  | 54.48  |
| 104 | 255748 | 165309 | 55.63  |

|     |        |        |        |
|-----|--------|--------|--------|
| 105 | 61205  | 39719  | 55.56  |
| 106 | 175660 | 117269 | 57.60  |
| 107 | 91271  | 59811  | 56.66  |
| 108 | 106677 | 70116  | 56.84  |
| 109 | 114018 | 73969  | 56.10  |
| 110 | 186986 | 126294 | 58.12  |
| 111 | 97670  | 131051 | 116.70 |
| 112 | 93580  | 64090  | 58.85  |
| 113 | 210404 | 141059 | 57.86  |
| 114 | 123031 | 78299  | 54.90  |
| 115 | 99744  | 64397  | 55.54  |
| 116 | 59843  | 41138  | 59.43  |
| 117 | 59815  | 34123  | 48.85  |
| 118 | 162979 | 108526 | 57.40  |
| 119 | 65061  | 47646  | 62.26  |
| 120 | 174079 | 133392 | 66.32  |
| 121 | 62461  | 42692  | 58.35  |
| 122 | 120364 | 86247  | 61.63  |
| 123 | 93542  | 77468  | 71.64  |
| 124 | 60248  | 40775  | 58.35  |
| 125 | 328515 | 223016 | 58.33  |
| 126 | 137348 | 95140  | 59.94  |
| 127 | 81168  | 54698  | 58.33  |
| 128 | 77395  | 51820  | 57.34  |
| 129 | 127494 | 84337  | 57.01  |
| 130 | 72353  | 49172  | 58.87  |
| 131 | 62800  | 40908  | 56.29  |
| 132 | 58079  | 40249  | 59.91  |
| 133 | 58020  | 35335  | 52.07  |
| 134 | 57910  | 34368  | 51.10  |
| 135 | 75714  | 51086  | 58.14  |
| 136 | 99799  | 66546  | 57.43  |
| 137 | 177394 | 118614 | 57.81  |
| 138 | 98239  | 73096  | 63.58  |
| 139 | 112749 | 76625  | 58.90  |
| 140 | 129006 | 84653  | 56.43  |
| 141 | 286137 | 194623 | 58.47  |
| 142 | 321698 | 221278 | 59.09  |
| 143 | 79722  | 54099  | 58.53  |
| 144 | 71343  | 43378  | 52.31  |
| 145 | 56565  | 36656  | 56.19  |
| 146 | 193525 | 143249 | 63.45  |
| 147 | 177183 | 116584 | 57.00  |
| 148 | 56217  | 36391  | 56.01  |
| 149 | 266885 | 180395 | 58.28  |
| 150 | 176950 | 129987 | 63.01  |
| 151 | 179797 | 122811 | 59.14  |
| 152 | 116329 | 79644  | 59.06  |
| 153 | 121041 | 93496  | 63.66  |
| 154 | 114202 | 76413  | 57.73  |
| 155 | 192685 | 128296 | 57.25  |
| 156 | 107233 | 68168  | 54.84  |
| 157 | 65188  | 41318  | 54.75  |
| 158 | 56708  | 37351  | 56.62  |
| 159 | 118256 | 76351  | 55.75  |
| 160 | 165689 | 110043 | 57.17  |
| 161 | 168051 | 114942 | 59.07  |
| 162 | 74738  | 53599  | 61.52  |
| 163 | 70798  | 41710  | 49.94  |
| 164 | 74257  | 48922  | 57.07  |
| 165 | 110181 | 75486  | 58.71  |
| 166 | 148193 | 97425  | 56.02  |
| 167 | 53643  | 37047  | 59.79  |
| 168 | 123844 | 85761  | 58.31  |
| 169 | 85289  | 57626  | 57.74  |
| 170 | 143356 | 94148  | 56.63  |
| 171 | 85647  | 60590  | 60.73  |
| 172 | 70511  | 45176  | 55.23  |

|     |        |        |        |
|-----|--------|--------|--------|
| 173 | 72271  | 48172  | 57.10  |
| 174 | 56390  | 36462  | 55.87  |
| 175 | 97672  | 68771  | 60.28  |
| 176 | 65100  | 41416  | 55.01  |
| 177 | 52223  | 35101  | 57.98  |
| 178 | 52176  | 33485  | 55.44  |
| 179 | 82011  | 55489  | 58.37  |
| 180 | 124833 | 112746 | 77.65  |
| 181 | 144501 | 93735  | 55.86  |
| 182 | 63359  | 42132  | 57.47  |
| 183 | 116878 | 78171  | 57.86  |
| 184 | 51663  | 34892  | 58.23  |
| 185 | 51571  | 36172  | 60.80  |
| 186 | 133269 | 91071  | 59.06  |
| 187 | 157610 | 214994 | 117.57 |
| 188 | 109914 | 69384  | 54.44  |
| 189 | 201745 | 132908 | 56.94  |
| 190 | 97137  | 65614  | 58.36  |
| 191 | 139242 | 91362  | 56.32  |
| 192 | 54400  | 39707  | 62.89  |
| 193 | 88604  | 64329  | 62.90  |
| 194 | 118796 | 72887  | 52.65  |
| 195 | 50511  | 37013  | 63.09  |
| 196 | 112378 | 75543  | 57.86  |
| 197 | 258686 | 177253 | 58.71  |
| 198 | 50377  | 34529  | 59.21  |
| 199 | 137194 | 85515  | 53.77  |
| 200 | 142665 | 95853  | 57.87  |
| 201 | 73540  | 51368  | 60.41  |
| 202 | 50102  | 31577  | 54.56  |
| 203 | 123289 | 73858  | 51.62  |
| 204 | 53771  | 35333  | 56.71  |
| 205 | 57946  | 39958  | 59.48  |
| 206 | 54733  | 33732  | 53.14  |
| 207 | 102377 | 69804  | 58.96  |
| 208 | 141580 | 100077 | 61.00  |
| 209 | 97348  | 70647  | 62.57  |
| 210 | 62727  | 44797  | 61.46  |
| 211 | 211517 | 140645 | 57.26  |
| 212 | 115170 | 78284  | 58.54  |
| 213 | 91868  | 66997  | 62.42  |
| 214 | 51886  | 36957  | 61.25  |
| 215 | 171261 | 140015 | 70.13  |
| 216 | 68838  | 37115  | 46.00  |
| 217 | 51735  | 33694  | 56.28  |
| 218 | 99890  | 68082  | 58.45  |
| 219 | 49653  | 33444  | 58.19  |
| 220 | 62271  | 39373  | 54.20  |
| 221 | 47585  | 27999  | 49.72  |
| 222 | 154508 | 107622 | 60.16  |
| 223 | 139746 | 86480  | 53.05  |
| 224 | 63906  | 41074  | 55.52  |
| 225 | 137587 | 92922  | 57.52  |
| 226 | 127311 | 81717  | 55.27  |
| 227 | 86592  | 56113  | 55.65  |
| 228 | 211282 | 150170 | 61.24  |
| 229 | 140265 | 85272  | 52.41  |
| 230 | 65568  | 45949  | 60.59  |
| 231 | 196863 | 130513 | 56.92  |
| 232 | 329788 | 214324 | 55.88  |
| 233 | 46604  | 30702  | 57.16  |
| 234 | 119624 | 84705  | 61.15  |
| 235 | 54906  | 36404  | 57.16  |
| 236 | 50122  | 32350  | 55.63  |
| 237 | 78196  | 51571  | 56.88  |
| 238 | 101967 | 67476  | 57.23  |
| 239 | 115663 | 72488  | 53.97  |
| 240 | 46012  | 30609  | 57.41  |



|     |        |        |        |
|-----|--------|--------|--------|
| 241 | 150960 | 97851  | 55.84  |
| 242 | 100207 | 62795  | 53.92  |
| 243 | 76249  | 49103  | 55.46  |
| 244 | 49749  | 37649  | 64.64  |
| 245 | 55046  | 37265  | 58.30  |
| 246 | 137786 | 87396  | 54.56  |
| 247 | 75168  | 49067  | 56.19  |
| 248 | 131524 | 160331 | 105.23 |
| 249 | 88209  | 58713  | 57.48  |
| 250 | 151971 | 100611 | 56.85  |
| 251 | 124822 | 82740  | 57.13  |
| 252 | 121895 | 79569  | 56.37  |
| 253 | 172711 | 118594 | 59.21  |
| 254 | 85809  | 58475  | 58.73  |
| 255 | 58403  | 43262  | 63.60  |
| 256 | 53382  | 35441  | 57.05  |
| 257 | 209020 | 139392 | 57.52  |
| 258 | 83856  | 52402  | 53.99  |
| 259 | 113454 | 71347  | 54.28  |
| 260 | 68815  | 42408  | 53.21  |
| 261 | 70656  | 43936  | 53.77  |
| 262 | 57435  | 39508  | 59.05  |
| 263 | 67216  | 44403  | 57.07  |
| 264 | 124923 | 86858  | 59.51  |
| 265 | 91369  | 58852  | 55.61  |
| 266 | 44102  | 27301  | 53.27  |
| 267 | 83101  | 55967  | 57.74  |
| 268 | 148703 | 95782  | 55.22  |
| 269 | 43954  | 31019  | 60.35  |
| 270 | 318215 | 202334 | 54.86  |
| 271 | 100775 | 66409  | 56.89  |
| 272 | 59960  | 41203  | 59.44  |
| 273 | 98991  | 62397  | 54.27  |
| 274 | 103577 | 69752  | 57.81  |
| 275 | 172884 | 110914 | 55.13  |
| 276 | 43204  | 27985  | 56.17  |
| 277 | 42963  | 28500  | 57.48  |
| 278 | 42954  | 27481  | 55.56  |
| 279 | 188966 | 127513 | 58.13  |
| 280 | 84456  | 56571  | 57.72  |
| 281 | 64541  | 42604  | 56.74  |
| 282 | 42542  | 28621  | 58.46  |
| 283 | 82439  | 55016  | 57.79  |
| 284 | 108086 | 71808  | 57.30  |
| 285 | 44040  | 34092  | 65.89  |
| 286 | 126040 | 80411  | 54.77  |
| 287 | 63286  | 40814  | 55.39  |
| 288 | 129703 | 84174  | 55.96  |
| 289 | 72757  | 52588  | 62.33  |
| 290 | 56290  | 40608  | 61.31  |
| 291 | 117642 | 87690  | 64.19  |
| 292 | 178755 | 118901 | 57.41  |
| 293 | 45337  | 29873  | 56.80  |
| 294 | 44345  | 31915  | 61.52  |
| 295 | 174154 | 112729 | 55.67  |
| 296 | 46186  | 28141  | 52.15  |
| 297 | 41481  | 28396  | 59.03  |
| 298 | 51642  | 30326  | 50.24  |
| 299 | 134107 | 95972  | 61.81  |
| 300 | 80517  | 50960  | 54.61  |
| 301 | 45915  | 33734  | 62.62  |
| 302 | 69887  | 45913  | 56.30  |
| 303 | 122725 | 80645  | 56.60  |
| 304 | 72903  | 50151  | 59.58  |
| 305 | 46298  | 31876  | 59.21  |
| 306 | 65908  | 42414  | 55.48  |
| 307 | 151821 | 97890  | 55.66  |
| 308 | 117991 | 88298  | 64.48  |

|     |        |        |        |
|-----|--------|--------|--------|
| 309 | 133779 | 178865 | 115.83 |
| 310 | 41964  | 26996  | 55.28  |
| 311 | 61283  | 41015  | 57.83  |
| 312 | 76577  | 50097  | 56.42  |
| 313 | 48381  | 32195  | 57.29  |
| 314 | 40098  | 25040  | 53.75  |
| 315 | 53489  | 39624  | 63.70  |
| 316 | 71093  | 53496  | 65.00  |
| 317 | 40035  | 25795  | 55.73  |
| 318 | 39976  | 25620  | 55.25  |
| 319 | 49637  | 33307  | 58.00  |
| 320 | 67401  | 46025  | 58.09  |
| 321 | 44078  | 39356  | 76.97  |
| 322 | 101132 | 68205  | 57.93  |
| 323 | 42605  | 29537  | 59.43  |
| 324 | 56801  | 38718  | 59.02  |
| 325 | 86129  | 62617  | 62.72  |
| 326 | 39384  | 27834  | 61.25  |
| 327 | 44312  | 29652  | 57.79  |
| 328 | 62370  | 52410  | 72.40  |
| 329 | 74272  | 44095  | 51.20  |
| 330 | 164407 | 106075 | 55.85  |
| 331 | 57239  | 36447  | 53.76  |
| 332 | 216320 | 138003 | 55.00  |
| 333 | 80337  | 50704  | 54.33  |
| 334 | 38960  | 23754  | 52.85  |
| 335 | 173153 | 114104 | 56.88  |
| 336 | 82212  | 119256 | 125.20 |
| 337 | 88936  | 61357  | 59.19  |
| 338 | 83644  | 79510  | 82.48  |
| 339 | 69998  | 47869  | 58.30  |
| 340 | 72647  | 49443  | 58.82  |
| 341 | 99001  | 61491  | 53.18  |
| 342 | 38507  | 25004  | 55.88  |
| 343 | 100275 | 64444  | 55.32  |
| 344 | 225593 | 153119 | 58.49  |
| 345 | 82633  | 56498  | 58.87  |
| 346 | 127236 | 88055  | 59.55  |
| 347 | 41380  | 25009  | 52.24  |
| 348 | 81832  | 63002  | 64.89  |
| 349 | 110855 | 73924  | 57.07  |
| 350 | 67308  | 44613  | 57.54  |
| 351 | 37712  | 24884  | 56.83  |
| 352 | 83672  | 60545  | 62.53  |
| 353 | 144676 | 92482  | 54.78  |
| 354 | 78059  | 48901  | 54.24  |
| 355 | 44799  | 27348  | 52.49  |
| 356 | 112687 | 83408  | 63.94  |
| 357 | 187470 | 132839 | 60.89  |
| 358 | 44497  | 34464  | 66.40  |
| 359 | 51083  | 35714  | 60.71  |
| 360 | 46768  | 31580  | 57.30  |
| 361 | 68819  | 43073  | 53.72  |
| 362 | 45689  | 30549  | 56.96  |
| 363 | 52746  | 35387  | 57.95  |
| 364 | 82618  | 54645  | 56.63  |
| 365 | 114418 | 75497  | 56.77  |
| 366 | 37022  | 32911  | 76.00  |
| 367 | 64089  | 40720  | 54.20  |
| 368 | 40498  | 27630  | 59.09  |
| 369 | 69696  | 45512  | 56.00  |
| 370 | 95533  | 59543  | 53.60  |
| 371 | 133986 | 84836  | 54.39  |
| 372 | 77937  | 52023  | 57.25  |
| 373 | 40859  | 26155  | 55.36  |
| 374 | 80959  | 54382  | 58.18  |
| 375 | 82457  | 55741  | 58.39  |
| 376 | 36478  | 32024  | 75.81  |

|     |        |        |       |
|-----|--------|--------|-------|
| 377 | 105202 | 71516  | 58.99 |
| 378 | 67587  | 43600  | 55.45 |
| 379 | 176433 | 130444 | 63.58 |
| 380 | 108845 | 71419  | 56.15 |
| 381 | 49028  | 33583  | 58.66 |
| 382 | 81605  | 52551  | 55.72 |
| 383 | 55021  | 35638  | 55.75 |
| 384 | 106921 | 76612  | 61.86 |
| 385 | 42973  | 31317  | 62.59 |
| 386 | 43476  | 29316  | 57.61 |
| 387 | 63759  | 46752  | 63.35 |
| 388 | 36082  | 23254  | 55.67 |
| 389 | 54038  | 35332  | 56.33 |
| 390 | 53341  | 44098  | 71.16 |
| 391 | 85227  | 57098  | 57.76 |
| 392 | 77618  | 54694  | 60.71 |
| 393 | 160693 | 102417 | 54.80 |
| 394 | 69156  | 42902  | 53.36 |
| 395 | 35395  | 24227  | 57.53 |
| 396 | 35377  | 22405  | 54.53 |
| 397 | 36638  | 25746  | 60.83 |
| 398 | 85464  | 62750  | 63.11 |
| 399 | 169219 | 114509 | 58.52 |
| 400 | 65647  | 42768  | 55.98 |
| 401 | 177949 | 121442 | 58.95 |
| 402 | 41991  | 32981  | 66.61 |
| 403 | 99656  | 67666  | 58.68 |
| 404 | 162428 | 109981 | 58.13 |
| 405 | 59717  | 37688  | 54.35 |
| 406 | 169324 | 130375 | 65.30 |
| 407 | 54454  | 34063  | 53.29 |
| 408 | 47307  | 28688  | 52.56 |
| 409 | 63173  | 40390  | 55.29 |
| 410 | 48605  | 31087  | 54.48 |
| 411 | 56283  | 39197  | 59.89 |
| 412 | 34679  | 20756  | 51.43 |
| 413 | 43205  | 27964  | 56.22 |
| 414 | 45271  | 27898  | 53.33 |
| 415 | 109598 | 73022  | 56.74 |
| 416 | 56894  | 39236  | 59.55 |
| 417 | 34068  | 23793  | 60.12 |
| 418 | 40331  | 26673  | 56.60 |
| 419 | 125672 | 85273  | 58.66 |
| 420 | 72255  | 49463  | 58.79 |
| 421 | 79089  | 53721  | 58.25 |
| 422 | 53665  | 47857  | 74.56 |
| 423 | 33804  | 24010  | 61.33 |
| 424 | 83383  | 55469  | 57.22 |
| 425 | 126078 | 85203  | 58.20 |
| 426 | 83970  | 54490  | 56.14 |
| 427 | 33700  | 23505  | 59.67 |
| 428 | 65844  | 44120  | 58.02 |
| 429 | 63753  | 43599  | 59.04 |
| 430 | 52786  | 34683  | 56.64 |
| 431 | 70437  | 47799  | 58.20 |
| 432 | 50892  | 40970  | 69.44 |
| 433 | 76787  | 56885  | 63.97 |
| 434 | 33133  | 22713  | 59.72 |
| 435 | 244044 | 164915 | 58.06 |
| 436 | 101144 | 66214  | 56.64 |
| 437 | 66223  | 45579  | 58.75 |
| 438 | 32963  | 21510  | 56.28 |
| 439 | 32954  | 21261  | 55.62 |
| 440 | 36101  | 25641  | 59.80 |
| 441 | 86961  | 53823  | 53.28 |
| 442 | 100763 | 70554  | 60.55 |
| 443 | 72677  | 48834  | 57.60 |
| 444 | 32711  | 21215  | 56.09 |

|     |        |        |        |
|-----|--------|--------|--------|
| 445 | 230577 | 164632 | 61.35  |
| 446 | 73411  | 50820  | 59.20  |
| 447 | 32685  | 24148  | 63.51  |
| 448 | 86854  | 60871  | 60.44  |
| 449 | 56099  | 38957  | 59.79  |
| 450 | 37577  | 32110  | 72.65  |
| 451 | 32514  | 52483  | 139.77 |
| 452 | 96599  | 63110  | 56.18  |
| 453 | 55569  | 36433  | 56.57  |
| 454 | 82611  | 58300  | 60.71  |
| 455 | 71709  | 51466  | 60.77  |
| 456 | 44428  | 30274  | 59.01  |
| 457 | 252597 | 170971 | 58.42  |
| 458 | 67511  | 47687  | 59.52  |
| 459 | 38059  | 22962  | 51.82  |
| 460 | 44403  | 25666  | 48.90  |
| 461 | 53176  | 31963  | 51.14  |
| 462 | 52775  | 35735  | 57.90  |
| 463 | 77014  | 52633  | 58.62  |
| 464 | 35530  | 28331  | 69.08  |
| 465 | 35079  | 24282  | 59.66  |
| 466 | 83470  | 56390  | 57.92  |
| 467 | 84959  | 57433  | 58.22  |
| 468 | 33099  | 21131  | 54.93  |
| 469 | 132717 | 85829  | 55.34  |
| 470 | 85034  | 57725  | 58.33  |
| 471 | 44190  | 33167  | 64.09  |
| 472 | 118023 | 90801  | 66.07  |
| 473 | 35293  | 25139  | 61.21  |
| 474 | 58151  | 35413  | 52.42  |
| 475 | 45566  | 52041  | 97.50  |
| 476 | 31337  | 18792  | 51.93  |
| 477 | 75465  | 48855  | 55.13  |
| 478 | 41096  | 27056  | 56.87  |
| 479 | 76086  | 63901  | 72.94  |
| 480 | 122444 | 83913  | 59.07  |
| 481 | 83544  | 54208  | 55.83  |
| 482 | 31098  | 21708  | 60.45  |
| 483 | 31032  | 20671  | 57.16  |
| 484 | 96594  | 67898  | 60.33  |
| 485 | 95407  | 65186  | 58.84  |
| 486 | 48345  | 39153  | 68.54  |
| 487 | 38465  | 24929  | 55.40  |
| 488 | 72203  | 51749  | 61.34  |
| 489 | 34732  | 26403  | 64.64  |
| 490 | 54455  | 34199  | 54.43  |
| 491 | 30459  | 25218  | 71.08  |
| 492 | 30456  | 20038  | 56.92  |
| 493 | 35878  | 30424  | 73.00  |
| 494 | 102492 | 71570  | 59.80  |
| 495 | 45396  | 32722  | 61.42  |
| 496 | 53610  | 41636  | 66.70  |
| 497 | 55468  | 35993  | 55.43  |
| 498 | 49455  | 32104  | 56.05  |
| 499 | 109586 | 71322  | 56.08  |
| 500 | 68315  | 42599  | 53.11  |
| 501 | 34906  | 24922  | 61.33  |
| 502 | 64811  | 44373  | 59.19  |
| 503 | 29928  | 25296  | 72.33  |
| 504 | 43545  | 27713  | 54.84  |
| 505 | 29827  | 18910  | 54.91  |
| 506 | 55977  | 37226  | 57.29  |
| 507 | 67207  | 47318  | 60.41  |
| 508 | 29781  | 20236  | 59.05  |
| 509 | 46433  | 35360  | 66.01  |
| 510 | 39984  | 28222  | 61.22  |
| 511 | 47340  | 32815  | 59.42  |
| 512 | 62467  | 43095  | 59.40  |

|     |        |       |        |
|-----|--------|-------|--------|
| 513 | 94321  | 61130 | 55.87  |
| 514 | 69021  | 45884 | 57.16  |
| 515 | 72553  | 46419 | 55.08  |
| 516 | 41218  | 22961 | 47.81  |
| 517 | 38053  | 21528 | 48.46  |
| 518 | 61688  | 44041 | 61.24  |
| 519 | 58929  | 36914 | 53.87  |
| 520 | 31744  | 21059 | 57.30  |
| 521 | 62780  | 44511 | 61.17  |
| 522 | 63568  | 41428 | 55.93  |
| 523 | 29352  | 19748 | 58.28  |
| 524 | 103800 | 83343 | 68.22  |
| 525 | 97528  | 67565 | 59.00  |
| 526 | 29226  | 18898 | 55.70  |
| 527 | 80786  | 53638 | 56.85  |
| 528 | 48858  | 32686 | 57.87  |
| 529 | 42178  | 39442 | 76.10  |
| 530 | 67295  | 48277 | 61.42  |
| 531 | 38666  | 24413 | 54.11  |
| 532 | 66833  | 43736 | 56.65  |
| 533 | 29059  | 19712 | 58.26  |
| 534 | 35869  | 21264 | 51.17  |
| 535 | 53830  | 41462 | 65.88  |
| 536 | 90583  | 65151 | 60.70  |
| 537 | 28937  | 18830 | 56.28  |
| 538 | 57359  | 38446 | 57.62  |
| 539 | 37127  | 26600 | 61.14  |
| 540 | 28801  | 20793 | 61.89  |
| 541 | 55488  | 35215 | 54.81  |
| 542 | 49537  | 31644 | 55.33  |
| 543 | 28719  | 19316 | 58.27  |
| 544 | 57684  | 37699 | 56.29  |
| 545 | 50549  | 38267 | 64.65  |
| 546 | 34937  | 24563 | 60.92  |
| 547 | 69723  | 47980 | 59.61  |
| 548 | 86943  | 61838 | 60.18  |
| 549 | 28561  | 18630 | 56.26  |
| 550 | 34155  | 22989 | 58.02  |
| 551 | 35000  | 25464 | 62.15  |
| 552 | 44322  | 27987 | 54.01  |
| 553 | 50590  | 32913 | 55.11  |
| 554 | 40286  | 26478 | 56.83  |
| 555 | 38733  | 37464 | 77.82  |
| 556 | 63685  | 44380 | 59.20  |
| 557 | 59060  | 37812 | 54.61  |
| 558 | 28162  | 18770 | 57.80  |
| 559 | 87827  | 64394 | 62.83  |
| 560 | 55335  | 42059 | 64.27  |
| 561 | 27853  | 18858 | 58.56  |
| 562 | 48266  | 31999 | 57.25  |
| 563 | 27708  | 18267 | 55.57  |
| 564 | 27704  | 26057 | 81.32  |
| 565 | 31752  | 41419 | 111.42 |
| 566 | 27695  | 19412 | 61.00  |
| 567 | 41583  | 56505 | 115.43 |
| 568 | 61435  | 46252 | 63.76  |
| 569 | 49424  | 32363 | 55.53  |
| 570 | 31449  | 22959 | 63.06  |
| 571 | 71780  | 63689 | 76.11  |
| 572 | 27508  | 20367 | 64.08  |
| 573 | 40744  | 28090 | 59.13  |
| 574 | 43071  | 29551 | 58.40  |
| 575 | 27427  | 14585 | 46.14  |
| 576 | 64249  | 42797 | 57.06  |
| 577 | 59568  | 43131 | 61.31  |
| 578 | 80588  | 52092 | 55.69  |
| 579 | 55155  | 35648 | 55.29  |
| 580 | 47900  | 31847 | 57.08  |

|     |        |        |       |
|-----|--------|--------|-------|
| 581 | 27269  | 16803  | 53.24 |
| 582 | 42609  | 26194  | 52.83 |
| 583 | 31452  | 21705  | 59.00 |
| 584 | 60886  | 43076  | 61.00 |
| 585 | 52650  | 32828  | 53.68 |
| 586 | 27119  | 19562  | 61.91 |
| 587 | 72883  | 48983  | 57.43 |
| 588 | 27065  | 18183  | 58.48 |
| 589 | 38387  | 24318  | 54.74 |
| 590 | 41860  | 36073  | 72.09 |
| 591 | 78458  | 50866  | 55.80 |
| 592 | 69280  | 58185  | 72.20 |
| 593 | 107412 | 71398  | 57.42 |
| 594 | 152607 | 103205 | 58.03 |
| 595 | 61674  | 42274  | 58.93 |
| 596 | 26854  | 17741  | 57.10 |
| 597 | 26830  | 19590  | 62.17 |
| 598 | 57919  | 38262  | 56.61 |
| 599 | 70638  | 47057  | 57.20 |
| 600 | 38815  | 25925  | 57.23 |
| 601 | 67620  | 44804  | 57.15 |
| 602 | 26733  | 18460  | 59.34 |
| 603 | 26698  | 23693  | 72.21 |
| 604 | 26679  | 17515  | 56.47 |
| 605 | 74591  | 54351  | 62.23 |
| 606 | 30545  | 24961  | 70.13 |
| 607 | 35783  | 32521  | 78.76 |
| 608 | 34641  | 22816  | 56.99 |
| 609 | 76271  | 48249  | 54.49 |
| 610 | 26385  | 17959  | 59.00 |
| 611 | 90191  | 63649  | 60.10 |
| 612 | 36741  | 22364  | 52.35 |
| 613 | 26292  | 17099  | 55.89 |
| 614 | 125039 | 78782  | 54.36 |
| 615 | 46851  | 37802  | 70.77 |
| 616 | 36061  | 27010  | 63.68 |
| 617 | 30165  | 20442  | 58.39 |
| 618 | 26139  | 17544  | 57.72 |
| 619 | 92742  | 61138  | 57.11 |
| 620 | 45122  | 28274  | 53.93 |
| 621 | 115829 | 74606  | 55.40 |
| 622 | 81220  | 62209  | 65.84 |
| 623 | 47623  | 31815  | 57.26 |
| 624 | 26001  | 18867  | 61.60 |
| 625 | 84540  | 58004  | 58.29 |
| 626 | 31342  | 36163  | 98.52 |
| 627 | 37615  | 22361  | 50.86 |
| 628 | 35810  | 28690  | 68.93 |
| 629 | 57999  | 41335  | 60.06 |
| 630 | 25862  | 17462  | 58.37 |
| 631 | 25813  | 17139  | 57.17 |
| 632 | 35339  | 19205  | 46.20 |
| 633 | 88638  | 61072  | 59.21 |
| 634 | 36778  | 31623  | 73.20 |
| 635 | 25706  | 16209  | 54.50 |
| 636 | 31101  | 21312  | 58.20 |
| 637 | 59115  | 40711  | 59.37 |
| 638 | 25536  | 18627  | 62.15 |
| 639 | 71972  | 47730  | 57.18 |
| 640 | 42057  | 27954  | 57.47 |
| 641 | 49622  | 35637  | 62.26 |
| 642 | 46244  | 32930  | 61.29 |
| 643 | 25462  | 20038  | 67.55 |
| 644 | 41962  | 26238  | 54.06 |
| 645 | 82392  | 53776  | 56.09 |
| 646 | 75430  | 66173  | 75.29 |
| 647 | 27816  | 22417  | 68.88 |
| 648 | 25242  | 16561  | 57.05 |

|     |        |        |       |
|-----|--------|--------|-------|
| 649 | 74836  | 48589  | 55.71 |
| 650 | 50379  | 40914  | 67.11 |
| 651 | 125823 | 83076  | 56.54 |
| 652 | 38945  | 28109  | 61.09 |
| 653 | 107907 | 70529  | 56.42 |
| 654 | 25099  | 21949  | 75.78 |
| 655 | 59823  | 41939  | 59.41 |
| 656 | 37018  | 24020  | 55.86 |
| 657 | 86171  | 56687  | 56.65 |
| 658 | 24914  | 18299  | 61.71 |
| 659 | 102028 | 71777  | 60.70 |
| 660 | 86658  | 57900  | 56.93 |
| 661 | 24863  | 17471  | 60.94 |
| 662 | 182458 | 122125 | 57.70 |
| 663 | 60369  | 43883  | 62.46 |
| 664 | 33944  | 21396  | 54.22 |
| 665 | 24807  | 16730  | 57.88 |
| 666 | 64062  | 40056  | 53.74 |
| 667 | 83031  | 53269  | 55.55 |
| 668 | 32315  | 20252  | 53.75 |
| 669 | 114507 | 77930  | 58.09 |
| 670 | 33936  | 22530  | 57.58 |
| 671 | 29212  | 18896  | 55.46 |
| 672 | 40825  | 28091  | 59.61 |
| 673 | 47551  | 31582  | 57.30 |
| 674 | 24424  | 16380  | 57.53 |
| 675 | 42427  | 34297  | 67.28 |
| 676 | 58854  | 36374  | 52.98 |
| 677 | 68345  | 44910  | 56.48 |
| 678 | 116201 | 82069  | 60.87 |
| 679 | 90141  | 63355  | 60.38 |
| 680 | 28235  | 17640  | 53.84 |
| 681 | 24247  | 17102  | 58.97 |
| 682 | 59684  | 55153  | 79.49 |
| 683 | 70261  | 47597  | 58.07 |
| 684 | 25744  | 18255  | 61.77 |
| 685 | 46609  | 31658  | 58.70 |
| 686 | 71661  | 52629  | 63.11 |
| 687 | 29445  | 19902  | 57.73 |
| 688 | 118870 | 71828  | 51.89 |
| 689 | 23959  | 24179  | 87.36 |
| 690 | 27297  | 17711  | 55.49 |
| 691 | 60973  | 38617  | 54.53 |
| 692 | 37639  | 26098  | 59.69 |
| 693 | 89831  | 59677  | 57.23 |
| 694 | 117475 | 73525  | 53.84 |
| 695 | 41457  | 42986  | 88.99 |
| 696 | 68572  | 45957  | 56.76 |
| 697 | 50324  | 34617  | 59.39 |
| 698 | 68995  | 41826  | 51.71 |
| 699 | 51804  | 34776  | 58.06 |
| 700 | 38055  | 25180  | 56.56 |
| 701 | 102624 | 67060  | 56.16 |
| 702 | 31100  | 20024  | 55.28 |
| 703 | 46958  | 31709  | 58.25 |
| 704 | 52318  | 34653  | 57.27 |
| 705 | 41266  | 26675  | 55.33 |
| 706 | 23380  | 19078  | 70.03 |
| 707 | 23345  | 15251  | 55.46 |
| 708 | 33392  | 22665  | 58.81 |
| 709 | 63985  | 42358  | 57.02 |
| 710 | 67492  | 44290  | 55.83 |
| 711 | 23218  | 15303  | 56.96 |
| 712 | 57965  | 37143  | 55.48 |
| 713 | 62368  | 45238  | 62.06 |
| 714 | 32250  | 20109  | 53.62 |
| 715 | 34723  | 24378  | 60.93 |
| 716 | 47075  | 42813  | 73.01 |

|     |        |       |        |
|-----|--------|-------|--------|
| 717 | 23003  | 15613 | 58.73  |
| 718 | 62328  | 42087 | 58.44  |
| 719 | 24230  | 19590 | 67.99  |
| 720 | 85480  | 62023 | 61.82  |
| 721 | 53535  | 41905 | 66.16  |
| 722 | 106868 | 73849 | 58.87  |
| 723 | 22879  | 14619 | 54.95  |
| 724 | 32074  | 20732 | 55.49  |
| 725 | 59273  | 38211 | 55.45  |
| 726 | 51620  | 34966 | 57.74  |
| 727 | 67161  | 58695 | 73.50  |
| 728 | 38219  | 26104 | 59.13  |
| 729 | 32423  | 21431 | 57.37  |
| 730 | 47424  | 32276 | 58.69  |
| 731 | 46648  | 33408 | 61.55  |
| 732 | 40985  | 26752 | 55.75  |
| 733 | 33947  | 25910 | 65.49  |
| 734 | 29849  | 18147 | 52.49  |
| 735 | 39423  | 27597 | 60.43  |
| 736 | 22545  | 776   | 1.60   |
| 737 | 34241  | 22775 | 56.73  |
| 738 | 46137  | 29538 | 55.08  |
| 739 | 33997  | 26657 | 67.13  |
| 740 | 45019  | 34182 | 65.38  |
| 741 | 47609  | 42082 | 75.74  |
| 742 | 43385  | 35164 | 69.80  |
| 743 | 106990 | 73232 | 58.95  |
| 744 | 77290  | 49029 | 54.59  |
| 745 | 30974  | 22738 | 62.98  |
| 746 | 55237  | 46392 | 70.85  |
| 747 | 22289  | 14206 | 54.99  |
| 748 | 22262  | 14830 | 57.66  |
| 749 | 22248  | 15466 | 56.01  |
| 750 | 57816  | 41258 | 60.15  |
| 751 | 59180  | 46510 | 66.41  |
| 752 | 90238  | 67748 | 63.99  |
| 753 | 22136  | 14384 | 55.82  |
| 754 | 104743 | 67032 | 54.99  |
| 755 | 62103  | 41323 | 57.39  |
| 756 | 24522  | 16101 | 56.70  |
| 757 | 26070  | 19047 | 63.02  |
| 758 | 84797  | 56307 | 57.21  |
| 759 | 45976  | 30375 | 56.63  |
| 760 | 25680  | 18282 | 60.48  |
| 761 | 26405  | 17037 | 55.53  |
| 762 | 41295  | 28271 | 59.22  |
| 763 | 21758  | 13882 | 54.99  |
| 764 | 21748  | 14208 | 56.42  |
| 765 | 90478  | 63985 | 60.47  |
| 766 | 33393  | 28086 | 72.37  |
| 767 | 46505  | 29996 | 55.53  |
| 768 | 23012  | 14827 | 55.48  |
| 769 | 107338 | 69358 | 55.64  |
| 770 | 44249  | 29509 | 57.39  |
| 771 | 86812  | 65029 | 63.09  |
| 772 | 38191  | 25896 | 58.66  |
| 773 | 21432  | 36157 | 146.97 |
| 774 | 105745 | 73280 | 58.87  |
| 775 | 21238  | 43008 | 150.79 |
| 776 | 25948  | 17885 | 59.43  |
| 777 | 24521  | 16983 | 60.03  |
| 778 | 82984  | 53955 | 56.06  |
| 779 | 21193  | 17206 | 70.43  |
| 780 | 21089  | 12794 | 52.31  |
| 781 | 27131  | 23470 | 66.74  |
| 782 | 28109  | 17619 | 53.81  |
| 783 | 21038  | 13963 | 57.79  |
| 784 | 21021  | 13667 | 56.14  |



|     |        |       |        |
|-----|--------|-------|--------|
| 785 | 72056  | 47497 | 56.73  |
| 786 | 34189  | 48935 | 120.89 |
| 787 | 104700 | 73004 | 58.32  |
| 788 | 41889  | 31912 | 65.82  |
| 789 | 34407  | 23899 | 60.04  |
| 790 | 20478  | 13005 | 54.40  |
| 791 | 45411  | 32717 | 61.50  |
| 792 | 45525  | 36624 | 66.22  |
| 793 | 48193  | 31359 | 56.16  |
| 794 | 86738  | 55425 | 54.76  |
| 795 | 33311  | 21724 | 56.16  |
| 796 | 34593  | 24267 | 60.81  |
| 797 | 60186  | 39632 | 56.99  |
| 798 | 22801  | 19454 | 69.84  |
| 799 | 46592  | 46400 | 85.47  |
| 800 | 56327  | 37531 | 57.14  |
| 801 | 131917 | 88598 | 57.86  |
| 802 | 33939  | 23685 | 60.49  |
| 803 | 23385  | 19768 | 71.81  |
| 804 | 20186  | 12432 | 53.26  |
| 805 | 49507  | 57966 | 101.25 |
| 806 | 33779  | 26166 | 65.38  |
| 807 | 25451  | 14979 | 50.40  |
| 808 | 45616  | 30146 | 56.57  |
| 809 | 37530  | 25412 | 57.08  |
| 810 | 19852  | 13745 | 59.72  |
| 811 | 42967  | 32604 | 65.33  |
| 812 | 19819  | 811   | 2.85   |
| 813 | 44889  | 32719 | 62.47  |
| 814 | 111293 | 78427 | 59.67  |
| 815 | 24436  | 15009 | 52.52  |
| 816 | 19780  | 13204 | 56.53  |
| 817 | 24394  | 15072 | 53.25  |
| 818 | 21313  | 13187 | 53.30  |
| 819 | 54158  | 42229 | 66.57  |
| 820 | 56235  | 36905 | 55.70  |
| 821 | 19648  | 16040 | 70.25  |
| 822 | 88098  | 57666 | 56.22  |
| 823 | 42000  | 27467 | 55.85  |
| 824 | 36087  | 26786 | 62.90  |
| 825 | 41929  | 28423 | 57.58  |
| 826 | 19556  | 13013 | 57.79  |
| 827 | 19531  | 12759 | 56.74  |
| 828 | 23012  | 15531 | 57.94  |
| 829 | 118004 | 77191 | 55.93  |
| 830 | 36648  | 42794 | 101.57 |
| 831 | 47757  | 29697 | 53.20  |
| 832 | 25691  | 20376 | 67.83  |
| 833 | 41481  | 30634 | 62.84  |
| 834 | 37544  | 25915 | 60.07  |
| 835 | 40701  | 26079 | 55.22  |
| 836 | 19258  | 12057 | 53.41  |
| 837 | 19219  | 21622 | 93.45  |
| 838 | 19193  | 13932 | 62.93  |
| 839 | 73235  | 46389 | 54.47  |
| 840 | 27586  | 15668 | 48.53  |
| 841 | 19103  | 12316 | 55.76  |
| 842 | 69724  | 38488 | 47.07  |
| 843 | 35117  | 21917 | 54.01  |
| 844 | 20326  | 14620 | 61.85  |
| 845 | 51747  | 37503 | 62.22  |
| 846 | 24467  | 14050 | 47.74  |
| 847 | 33810  | 21990 | 56.62  |
| 848 | 18821  | 12493 | 56.91  |
| 849 | 62708  | 41969 | 56.89  |
| 850 | 40347  | 25868 | 55.40  |
| 851 | 31887  | 21323 | 57.56  |
| 852 | 20882  | 16317 | 67.39  |

|     |        |       |        |
|-----|--------|-------|--------|
| 853 | 27857  | 17989 | 55.98  |
| 854 | 18657  | 14135 | 65.30  |
| 855 | 125850 | 86758 | 58.97  |
| 856 | 57952  | 45198 | 65.48  |
| 857 | 18596  | 198   | 0.50   |
| 858 | 18545  | 11401 | 52.81  |
| 859 | 18503  | 13774 | 64.43  |
| 860 | 20177  | 17288 | 70.90  |
| 861 | 67627  | 46929 | 59.76  |
| 862 | 36455  | 26137 | 61.74  |
| 863 | 76602  | 50031 | 56.19  |
| 864 | 25285  | 17001 | 57.49  |
| 865 | 18382  | 12328 | 57.03  |
| 866 | 46896  | 30859 | 56.86  |
| 867 | 33048  | 19937 | 51.77  |
| 868 | 26529  | 18253 | 58.63  |
| 869 | 19527  | 13010 | 57.16  |
| 870 | 27617  | 26518 | 82.96  |
| 871 | 30808  | 22040 | 60.74  |
| 872 | 19705  | 13974 | 60.08  |
| 873 | 18216  | 12274 | 58.35  |
| 874 | 30097  | 20068 | 57.63  |
| 875 | 23422  | 15901 | 58.55  |
| 876 | 18190  | 13189 | 62.94  |
| 877 | 20679  | 12815 | 53.48  |
| 878 | 18181  | 12647 | 60.35  |
| 879 | 47946  | 32109 | 57.47  |
| 880 | 39852  | 25220 | 54.69  |
| 881 | 17938  | 28726 | 139.27 |
| 882 | 51665  | 36956 | 60.35  |
| 883 | 37857  | 34051 | 77.49  |
| 884 | 24914  | 21422 | 73.24  |
| 885 | 17817  | 12459 | 60.84  |
| 886 | 27149  | 16892 | 53.78  |
| 887 | 17811  | 11973 | 58.27  |
| 888 | 35172  | 22295 | 54.52  |
| 889 | 36842  | 23946 | 54.75  |
| 890 | 17802  | 19793 | 96.06  |
| 891 | 28629  | 19447 | 58.94  |
| 892 | 32327  | 23476 | 61.57  |
| 893 | 44810  | 37141 | 69.73  |
| 894 | 35192  | 22799 | 55.74  |
| 895 | 41820  | 25329 | 51.90  |
| 896 | 17612  | 12004 | 58.78  |
| 897 | 50619  | 35016 | 57.70  |
| 898 | 30808  | 20113 | 55.61  |
| 899 | 21077  | 14183 | 57.86  |
| 900 | 17577  | 131   | 0.21   |
| 901 | 17556  | 11831 | 58.10  |
| 902 | 33427  | 22340 | 58.08  |
| 903 | 17533  | 722   | 2.57   |
| 904 | 17533  | 12599 | 62.11  |
| 905 | 49366  | 48873 | 83.39  |
| 906 | 72863  | 45801 | 53.67  |
| 907 | 37288  | 27667 | 63.25  |
| 908 | 17321  | 11134 | 55.70  |
| 909 | 44251  | 35003 | 66.41  |
| 910 | 20787  | 14674 | 60.98  |
| 911 | 27210  | 18133 | 57.30  |
| 912 | 22842  | 15066 | 57.00  |
| 913 | 28273  | 19405 | 59.26  |
| 914 | 59972  | 46766 | 65.33  |
| 915 | 20581  | 16381 | 67.31  |
| 916 | 27678  | 21206 | 65.00  |
| 917 | 31762  | 22047 | 59.50  |
| 918 | 28192  | 28792 | 88.08  |
| 919 | 17072  | 10113 | 51.18  |
| 920 | 54551  | 32995 | 52.15  |

|     |       |       |        |
|-----|-------|-------|--------|
| 921 | 27730 | 35351 | 108.90 |
| 922 | 20262 | 13992 | 59.45  |
| 923 | 37051 | 23300 | 54.19  |
| 924 | 16966 | 10317 | 52.13  |
| 925 | 16942 | 10918 | 55.13  |
| 926 | 33793 | 23156 | 58.24  |
| 927 | 38208 | 24112 | 53.89  |
| 928 | 65005 | 43715 | 57.62  |
| 929 | 24709 | 17766 | 62.08  |
| 930 | 40890 | 26736 | 56.42  |
| 931 | 24757 | 18749 | 64.20  |
| 932 | 16673 | 10969 | 56.97  |
| 933 | 16649 | 9840  | 50.76  |
| 934 | 56983 | 36273 | 54.58  |
| 935 | 28773 | 20590 | 60.63  |
| 936 | 55112 | 38300 | 59.83  |
| 937 | 28911 | 21097 | 61.68  |
| 938 | 21306 | 23184 | 93.82  |
| 939 | 49145 | 33896 | 58.71  |
| 940 | 22116 | 14444 | 56.34  |
| 941 | 16518 | 20262 | 106.06 |
| 942 | 16495 | 11329 | 58.97  |
| 943 | 16489 | 11128 | 58.05  |
| 944 | 18027 | 27640 | 129.00 |
| 945 | 16378 | 11938 | 60.71  |
| 946 | 17769 | 14642 | 70.67  |
| 947 | 51110 | 33082 | 55.14  |
| 948 | 16327 | 58966 | 311.72 |
| 949 | 25326 | 17244 | 57.35  |
| 950 | 77800 | 52138 | 57.82  |
| 951 | 45734 | 27151 | 51.02  |
| 952 | 16218 | 26634 | 139.55 |
| 953 | 30396 | 21452 | 60.63  |
| 954 | 16192 | 10870 | 58.01  |
| 955 | 37864 | 25755 | 58.18  |
| 956 | 25069 | 16126 | 55.09  |
| 957 | 16156 | 11968 | 63.17  |
| 958 | 36171 | 23091 | 54.97  |
| 959 | 38889 | 38150 | 81.41  |
| 960 | 21076 | 14703 | 60.04  |
| 961 | 16085 | 11693 | 62.96  |
| 962 | 63448 | 48942 | 66.63  |
| 963 | 95910 | 63143 | 56.11  |
| 964 | 16018 | 11152 | 60.65  |
| 965 | 32788 | 28056 | 73.67  |
| 966 | 15994 | 9983  | 54.03  |
| 967 | 19234 | 12771 | 57.35  |
| 968 | 19716 | 13182 | 57.94  |
| 969 | 32838 | 24839 | 64.44  |
| 970 | 15904 | 189   | 0.74   |
| 971 | 15853 | 10532 | 57.38  |
| 972 | 45660 | 30189 | 56.70  |
| 973 | 29818 | 28065 | 77.51  |
| 974 | 27625 | 18869 | 58.78  |
| 975 | 15754 | 27940 | 152.77 |
| 976 | 15724 | 13982 | 76.93  |
| 977 | 21619 | 14106 | 56.61  |
| 978 | 38997 | 27453 | 60.17  |
| 979 | 15640 | 10844 | 60.30  |
| 980 | 15636 | 16030 | 88.05  |
| 981 | 23400 | 16508 | 60.68  |
| 982 | 30046 | 19457 | 56.16  |
| 983 | 47888 | 37721 | 67.59  |
| 984 | 59271 | 37035 | 53.96  |
| 985 | 43505 | 26793 | 52.99  |
| 986 | 52902 | 34363 | 55.93  |
| 987 | 53247 | 41317 | 62.89  |
| 988 | 15473 | 10798 | 60.94  |

|      |       |       |        |
|------|-------|-------|--------|
| 989  | 18146 | 13289 | 62.68  |
| 990  | 25307 | 17613 | 58.96  |
| 991  | 15400 | 10116 | 55.69  |
| 992  | 29243 | 17437 | 51.34  |
| 993  | 15342 | 9156  | 51.42  |
| 994  | 33791 | 21241 | 53.93  |
| 995  | 15322 | 127   | 0.27   |
| 996  | 16471 | 10321 | 54.51  |
| 997  | 15287 | 8641  | 48.63  |
| 998  | 27517 | 17804 | 56.06  |
| 999  | 15277 | 25180 | 141.97 |
| 1000 | 45122 | 35034 | 65.86  |
| 1001 | 15255 | 9046  | 50.37  |
| 1002 | 15221 | 19508 | 111.27 |
| 1003 | 40028 | 35677 | 76.74  |
| 1004 | 18510 | 11387 | 53.08  |
| 1005 | 19565 | 14213 | 60.23  |
| 1006 | 20301 | 19867 | 83.99  |
| 1007 | 48529 | 31602 | 55.81  |
| 1008 | 15153 | 18195 | 101.50 |
| 1009 | 21794 | 14316 | 56.08  |
| 1010 | 15120 | 11279 | 64.61  |
| 1011 | 37701 | 33669 | 77.39  |
| 1012 | 28580 | 18511 | 54.89  |
| 1013 | 67615 | 42573 | 54.09  |
| 1014 | 15082 | 9124  | 52.20  |
| 1015 | 17101 | 18344 | 93.39  |
| 1016 | 47132 | 31550 | 55.95  |
| 1017 | 40547 | 26501 | 55.92  |
| 1018 | 45323 | 33490 | 63.68  |
| 1019 | 14996 | 165   | 0.41   |
| 1020 | 31566 | 19619 | 53.32  |
| 1021 | 14933 | 10519 | 59.85  |
| 1022 | 14900 | 9264  | 53.45  |
| 1023 | 19797 | 13907 | 61.07  |
| 1024 | 14890 | 9925  | 57.76  |
| 1025 | 14888 | 10539 | 60.63  |
| 1026 | 14869 | 16253 | 94.95  |
| 1027 | 50311 | 37835 | 63.89  |
| 1028 | 14858 | 137   | 0.50   |
| 1029 | 19966 | 13799 | 59.29  |
| 1030 | 30157 | 29459 | 77.64  |
| 1031 | 14811 | 9616  | 55.41  |
| 1032 | 31079 | 34978 | 95.26  |
| 1033 | 61600 | 41287 | 57.64  |
| 1034 | 14782 | 25558 | 149.68 |
| 1035 | 64388 | 51259 | 67.44  |
| 1036 | 14753 | 11546 | 67.18  |
| 1037 | 14726 | 10350 | 61.16  |
| 1038 | 29828 | 21517 | 61.42  |
| 1039 | 14697 | 9444  | 55.18  |
| 1040 | 14644 | 20646 | 122.77 |
| 1041 | 26257 | 14292 | 46.82  |
| 1042 | 14582 | 9489  | 56.36  |
| 1043 | 42967 | 30440 | 60.84  |
| 1044 | 14525 | 8485  | 49.61  |
| 1045 | 45691 | 44281 | 79.39  |
| 1046 | 30059 | 18953 | 54.70  |
| 1047 | 27552 | 27303 | 84.52  |
| 1048 | 26963 | 35775 | 115.29 |
| 1049 | 35271 | 24946 | 59.59  |
| 1050 | 68262 | 49963 | 61.89  |
| 1051 | 68848 | 46823 | 58.12  |
| 1052 | 44243 | 28290 | 55.17  |
| 1053 | 23352 | 15328 | 56.29  |
| 1054 | 18928 | 12459 | 56.20  |
| 1055 | 20675 | 13070 | 54.45  |
| 1056 | 34025 | 24251 | 61.23  |

|      |       |       |        |
|------|-------|-------|--------|
| 1057 | 14204 | 9899  | 60.25  |
| 1058 | 14201 | 16676 | 102.05 |
| 1059 | 38281 | 26410 | 58.66  |
| 1060 | 22843 | 16903 | 62.26  |
| 1061 | 14182 | 9765  | 59.95  |
| 1062 | 14182 | 9550  | 58.09  |
| 1063 | 17506 | 13037 | 64.07  |
| 1064 | 14167 | 10073 | 61.44  |
| 1065 | 14160 | 10303 | 62.41  |
| 1066 | 14151 | 10458 | 62.42  |
| 1067 | 28235 | 19813 | 58.79  |
| 1068 | 30126 | 25394 | 67.24  |
| 1069 | 22382 | 11303 | 43.81  |
| 1070 | 14079 | 225   | 1.02   |
| 1071 | 23181 | 14616 | 54.68  |
| 1072 | 24049 | 15821 | 56.83  |
| 1073 | 26369 | 31007 | 99.24  |
| 1074 | 27774 | 16411 | 49.74  |
| 1075 | 25657 | 17618 | 58.36  |
| 1076 | 13935 | 9064  | 55.90  |
| 1077 | 39247 | 38960 | 84.51  |
| 1078 | 21829 | 15663 | 60.46  |
| 1079 | 13834 | 14477 | 90.17  |
| 1080 | 13811 | 8952  | 55.97  |
| 1081 | 20011 | 12091 | 52.08  |
| 1082 | 58033 | 37718 | 53.75  |
| 1083 | 25993 | 17502 | 57.15  |
| 1084 | 17405 | 10828 | 53.45  |
| 1085 | 20531 | 13225 | 55.64  |
| 1086 | 13728 | 9789  | 61.37  |
| 1087 | 13728 | 16574 | 103.62 |
| 1088 | 15638 | 13489 | 72.05  |
| 1089 | 27371 | 18177 | 57.67  |
| 1090 | 38893 | 28910 | 63.42  |
| 1091 | 17077 | 12628 | 64.00  |
| 1092 | 25225 | 22965 | 78.94  |
| 1093 | 28937 | 22713 | 67.07  |
| 1094 | 13617 | 10554 | 66.09  |
| 1095 | 13583 | 11047 | 70.10  |
| 1096 | 26648 | 28880 | 92.21  |
| 1097 | 13517 | 12872 | 80.85  |
| 1098 | 34122 | 23234 | 56.75  |
| 1099 | 36320 | 25804 | 60.37  |
| 1100 | 19283 | 12721 | 57.07  |
| 1101 | 23711 | 16440 | 58.99  |
| 1102 | 18573 | 12509 | 58.14  |
| 1103 | 17775 | 12343 | 59.79  |
| 1104 | 13358 | 9573  | 62.13  |
| 1105 | 27488 | 19254 | 60.29  |
| 1106 | 13307 | 8583  | 55.57  |
| 1107 | 25236 | 14564 | 49.94  |
| 1108 | 21995 | 16712 | 64.85  |
| 1109 | 23053 | 15286 | 55.40  |
| 1110 | 16530 | 13556 | 70.75  |
| 1111 | 15636 | 13793 | 73.59  |
| 1112 | 19123 | 15635 | 68.76  |
| 1113 | 20992 | 14756 | 60.87  |
| 1114 | 32288 | 21228 | 56.43  |
| 1115 | 17816 | 18923 | 90.53  |
| 1116 | 13092 | 10834 | 71.04  |
| 1117 | 16176 | 10671 | 57.29  |
| 1118 | 17539 | 12310 | 60.16  |
| 1119 | 55633 | 38143 | 59.25  |
| 1120 | 24300 | 17728 | 62.88  |
| 1121 | 21339 | 12467 | 49.72  |
| 1122 | 12966 | 8905  | 59.19  |
| 1123 | 12953 | 14540 | 97.51  |
| 1124 | 17743 | 13622 | 66.33  |

|      |       |       |        |
|------|-------|-------|--------|
| 1125 | 35572 | 25361 | 60.95  |
| 1126 | 18941 | 14596 | 65.80  |
| 1127 | 12873 | 17513 | 118.57 |
| 1128 | 21111 | 13033 | 52.91  |
| 1129 | 15038 | 9189  | 52.02  |
| 1130 | 12738 | 8102  | 54.49  |
| 1131 | 12719 | 8621  | 58.86  |
| 1132 | 15311 | 13375 | 74.69  |
| 1133 | 24656 | 22853 | 75.94  |
| 1134 | 12709 | 7502  | 51.20  |
| 1135 | 21903 | 14396 | 56.31  |
| 1136 | 12661 | 8476  | 57.40  |
| 1137 | 13898 | 7492  | 46.75  |
| 1138 | 18810 | 12030 | 54.50  |
| 1139 | 12581 | 8346  | 57.36  |
| 1140 | 28861 | 16538 | 49.35  |
| 1141 | 26722 | 17341 | 55.80  |
| 1142 | 12548 | 9969  | 62.32  |
| 1143 | 12537 | 9667  | 66.37  |
| 1144 | 12529 | 10314 | 71.05  |
| 1145 | 12516 | 13940 | 95.34  |
| 1146 | 12511 | 7963  | 54.76  |
| 1147 | 14513 | 8884  | 53.00  |
| 1148 | 18713 | 17424 | 79.46  |
| 1149 | 12476 | 9365  | 61.44  |
| 1150 | 39453 | 31039 | 67.51  |
| 1151 | 12467 | 9158  | 63.48  |
| 1152 | 56779 | 45065 | 68.70  |
| 1153 | 24452 | 16942 | 59.79  |
| 1154 | 19734 | 11939 | 52.02  |
| 1155 | 15557 | 10640 | 58.22  |
| 1156 | 15194 | 11024 | 61.58  |
| 1157 | 15553 | 24274 | 134.64 |
| 1158 | 13880 | 10454 | 65.49  |
| 1159 | 12365 | 7682  | 53.66  |
| 1160 | 63277 | 35120 | 47.50  |
| 1161 | 12312 | 7665  | 53.40  |
| 1162 | 28596 | 63613 | 189.10 |
| 1163 | 53820 | 40418 | 64.90  |
| 1164 | 12270 | 8597  | 60.98  |
| 1165 | 12268 | 15258 | 108.04 |
| 1166 | 12246 | 7139  | 50.18  |
| 1167 | 18827 | 15777 | 67.98  |
| 1168 | 31992 | 22481 | 59.80  |
| 1169 | 31804 | 21316 | 57.79  |
| 1170 | 23920 | 15102 | 54.54  |
| 1171 | 23861 | 15728 | 56.67  |
| 1172 | 22957 | 13959 | 52.07  |
| 1173 | 12129 | 8233  | 58.66  |
| 1174 | 12097 | 7677  | 54.14  |
| 1175 | 25566 | 16604 | 55.05  |
| 1176 | 12060 | 15755 | 113.82 |
| 1177 | 30542 | 19725 | 55.97  |
| 1178 | 12029 | 8650  | 61.66  |
| 1179 | 12019 | 9075  | 64.09  |
| 1180 | 12012 | 7054  | 50.77  |
| 1181 | 12010 | 6889  | 49.25  |
| 1182 | 37938 | 27626 | 62.01  |
| 1183 | 11932 | 14882 | 107.72 |
| 1184 | 33542 | 22725 | 57.69  |
| 1185 | 21609 | 18190 | 70.55  |
| 1186 | 33498 | 22985 | 59.47  |
| 1187 | 17743 | 10792 | 52.20  |
| 1188 | 14460 | 9192  | 54.20  |
| 1189 | 11854 | 11417 | 83.84  |
| 1190 | 11851 | 8013  | 58.08  |
| 1191 | 13650 | 8474  | 53.51  |
| 1192 | 32901 | 22472 | 58.64  |

|      |       |       |        |
|------|-------|-------|--------|
| 1193 | 18783 | 13029 | 59.13  |
| 1194 | 11779 | 8271  | 60.24  |
| 1195 | 21789 | 15033 | 58.71  |
| 1196 | 20760 | 11134 | 45.50  |
| 1197 | 18629 | 16074 | 73.27  |
| 1198 | 11698 | 6657  | 48.91  |
| 1199 | 18900 | 19425 | 89.38  |
| 1200 | 21313 | 15384 | 61.48  |
| 1201 | 13374 | 9721  | 62.14  |
| 1202 | 11639 | 10904 | 78.55  |
| 1203 | 16235 | 10275 | 54.37  |
| 1204 | 16745 | 10766 | 55.54  |
| 1205 | 11581 | 9845  | 72.41  |
| 1206 | 11554 | 7450  | 56.11  |
| 1207 | 52012 | 33831 | 55.40  |
| 1208 | 25564 | 16219 | 54.75  |
| 1209 | 11519 | 11826 | 78.41  |
| 1210 | 27492 | 18902 | 59.58  |
| 1211 | 11495 | 7747  | 58.63  |
| 1212 | 14752 | 8902  | 51.13  |
| 1213 | 32646 | 21224 | 55.67  |
| 1214 | 11405 | 8143  | 61.40  |
| 1215 | 11359 | 10740 | 74.14  |
| 1216 | 47817 | 29726 | 53.48  |
| 1217 | 17792 | 12556 | 60.05  |
| 1218 | 11296 | 9157  | 67.17  |
| 1219 | 14979 | 9493  | 53.95  |
| 1220 | 17756 | 10040 | 48.81  |
| 1221 | 11242 | 13962 | 106.38 |
| 1222 | 13558 | 10065 | 62.19  |
| 1223 | 11141 | 16058 | 105.23 |
| 1224 | 17266 | 11522 | 57.74  |
| 1225 | 15169 | 30845 | 174.22 |
| 1226 | 52077 | 35706 | 58.47  |
| 1227 | 20693 | 15210 | 62.76  |
| 1228 | 13861 | 8723  | 53.49  |
| 1229 | 26683 | 21064 | 66.85  |
| 1230 | 17855 | 11103 | 52.24  |
| 1231 | 15354 | 16499 | 91.72  |
| 1232 | 12928 | 9288  | 61.65  |
| 1233 | 11039 | 10972 | 85.54  |
| 1234 | 43912 | 47676 | 86.11  |
| 1235 | 17602 | 9449  | 45.91  |
| 1236 | 11004 | 6926  | 53.93  |
| 1237 | 16669 | 9441  | 48.63  |
| 1238 | 20297 | 15269 | 63.86  |
| 1239 | 12514 | 14866 | 96.63  |
| 1240 | 28293 | 19315 | 58.10  |
| 1241 | 39606 | 27851 | 59.72  |
| 1242 | 10899 | 6812  | 54.05  |
| 1243 | 10867 | 7735  | 59.32  |
| 1244 | 16740 | 12159 | 62.55  |
| 1245 | 10856 | 13527 | 106.68 |
| 1246 | 10840 | 7534  | 60.40  |
| 1247 | 10802 | 13002 | 101.83 |
| 1248 | 10782 | 6799  | 53.12  |
| 1249 | 10772 | 13398 | 98.17  |
| 1250 | 10749 | 16619 | 133.35 |
| 1251 | 10738 | 8869  | 71.16  |
| 1252 | 12959 | 8322  | 55.48  |
| 1253 | 10702 | 6509  | 52.36  |
| 1254 | 10701 | 6427  | 51.52  |
| 1255 | 12557 | 7114  | 47.90  |
| 1256 | 31820 | 48270 | 130.33 |
| 1257 | 10623 | 6423  | 52.02  |
| 1258 | 18285 | 80608 | 382.55 |
| 1259 | 10583 | 7942  | 65.68  |
| 1260 | 10539 | 7712  | 62.52  |

|      |       |       |        |
|------|-------|-------|--------|
| 1261 | 10535 | 18375 | 151.81 |
| 1262 | 30906 | 20499 | 57.01  |
| 1263 | 10474 | 5794  | 48.24  |
| 1264 | 21723 | 13573 | 53.42  |
| 1265 | 13674 | 11199 | 71.13  |
| 1266 | 10424 | 7665  | 62.78  |
| 1267 | 27354 | 20942 | 65.06  |
| 1268 | 26981 | 17502 | 56.10  |
| 1269 | 22087 | 15082 | 58.50  |
| 1270 | 20308 | 13425 | 57.26  |
| 1271 | 10346 | 11198 | 89.25  |
| 1272 | 32895 | 20362 | 52.33  |
| 1273 | 10306 | 23007 | 183.73 |
| 1274 | 13214 | 8051  | 52.66  |
| 1275 | 23552 | 18304 | 66.69  |
| 1276 | 10257 | 113   | 0.52   |
| 1277 | 12583 | 6669  | 45.65  |
| 1278 | 10246 | 23672 | 198.47 |
| 1279 | 10236 | 7014  | 59.45  |
| 1280 | 13873 | 15863 | 97.46  |
| 1281 | 33531 | 38072 | 96.20  |
| 1282 | 39456 | 31273 | 64.72  |
| 1283 | 10160 | 6641  | 56.75  |
| 1284 | 10155 | 94    | 0.34   |
| 1285 | 24565 | 15669 | 54.83  |
| 1286 | 10136 | 7184  | 61.82  |
| 1287 | 15718 | 11207 | 61.35  |
| 1288 | 12930 | 17153 | 115.15 |
| 1289 | 10087 | 6146  | 52.35  |
| 1290 | 15829 | 9563  | 51.66  |
| 1291 | 22848 | 15240 | 57.37  |
| 1292 | 15235 | 32689 | 186.85 |
| 1293 | 9994  | 6097  | 50.83  |
| 1294 | 9943  | 6937  | 60.56  |
| 1295 | 9940  | 7087  | 61.57  |
| 1296 | 30428 | 25646 | 70.65  |
| 1297 | 28124 | 19104 | 58.54  |
| 1298 | 20562 | 18388 | 75.74  |
| 1299 | 12384 | 8247  | 57.35  |
| 1300 | 9875  | 6453  | 55.93  |
| 1301 | 9843  | 186   | 1.12   |
| 1302 | 18185 | 12544 | 58.79  |
| 1303 | 33273 | 22618 | 58.12  |
| 1304 | 9805  | 6897  | 60.94  |
| 1305 | 23116 | 20205 | 74.49  |
| 1306 | 9781  | 605   | 2.76   |
| 1307 | 26495 | 16878 | 54.24  |
| 1308 | 9769  | 6113  | 53.79  |
| 1309 | 14992 | 9484  | 53.73  |
| 1310 | 21956 | 14269 | 56.09  |
| 1311 | 14562 | 10406 | 60.75  |
| 1312 | 20127 | 14356 | 61.13  |
| 1313 | 9678  | 7263  | 63.37  |
| 1314 | 9668  | 9100  | 81.64  |
| 1315 | 9631  | 6134  | 53.88  |
| 1316 | 9631  | 6127  | 54.50  |
| 1317 | 9624  | 8283  | 74.75  |
| 1318 | 9621  | 16396 | 142.69 |
| 1319 | 11297 | 7791  | 57.49  |
| 1320 | 13424 | 10680 | 68.22  |
| 1321 | 26561 | 15736 | 50.99  |
| 1322 | 9579  | 5601  | 50.59  |
| 1323 | 9519  | 10398 | 94.97  |
| 1324 | 18145 | 22981 | 106.90 |
| 1325 | 9514  | 6575  | 60.22  |
| 1326 | 9496  | 5365  | 48.64  |
| 1327 | 9473  | 7714  | 69.87  |
| 1328 | 9456  | 16303 | 148.00 |



|      |       |       |        |
|------|-------|-------|--------|
| 1329 | 9446  | 6789  | 60.85  |
| 1330 | 17062 | 12881 | 63.94  |
| 1331 | 19082 | 16597 | 74.11  |
| 1332 | 18250 | 24658 | 116.46 |
| 1333 | 12258 | 7839  | 53.02  |
| 1334 | 9376  | 10496 | 96.61  |
| 1335 | 9351  | 10755 | 98.64  |
| 1336 | 14164 | 9881  | 59.03  |
| 1337 | 17057 | 10636 | 53.46  |
| 1338 | 19255 | 12325 | 55.17  |
| 1339 | 20729 | 12111 | 50.07  |
| 1340 | 11463 | 14797 | 110.32 |
| 1341 | 14354 | 9602  | 57.84  |
| 1342 | 35348 | 25189 | 60.88  |
| 1343 | 21154 | 13420 | 54.60  |
| 1344 | 18172 | 11447 | 54.27  |
| 1345 | 9250  | 13362 | 122.82 |
| 1346 | 9232  | 24516 | 216.82 |
| 1347 | 22525 | 14813 | 56.76  |
| 1348 | 15136 | 11510 | 62.76  |
| 1349 | 22915 | 22481 | 83.64  |
| 1350 | 14304 | 19241 | 115.16 |
| 1351 | 15263 | 9738  | 55.41  |
| 1352 | 11780 | 12384 | 85.90  |
| 1353 | 9983  | 6895  | 59.35  |
| 1354 | 23189 | 15277 | 55.31  |
| 1355 | 16560 | 11303 | 58.20  |
| 1356 | 15034 | 10521 | 59.93  |
| 1357 | 9087  | 9786  | 92.93  |
| 1358 | 19624 | 13174 | 56.55  |
| 1359 | 19296 | 11690 | 52.08  |
| 1360 | 13143 | 7998  | 52.21  |
| 1361 | 9024  | 89    | 0.39   |
| 1362 | 16247 | 9441  | 50.35  |
| 1363 | 8976  | 6380  | 61.97  |
| 1364 | 12052 | 8004  | 57.36  |
| 1365 | 12726 | 14422 | 96.37  |
| 1366 | 16356 | 12268 | 64.17  |
| 1367 | 8886  | 13932 | 134.35 |
| 1368 | 11962 | 8022  | 57.77  |
| 1369 | 8856  | 5169  | 50.08  |
| 1370 | 8837  | 13296 | 127.13 |
| 1371 | 8822  | 176   | 1.12   |
| 1372 | 8821  | 9678  | 92.97  |
| 1373 | 22580 | 14403 | 55.05  |
| 1374 | 18151 | 11903 | 55.85  |
| 1375 | 8759  | 9214  | 90.37  |
| 1376 | 8756  | 6135  | 61.19  |
| 1377 | 8732  | 74    | 0.26   |
| 1378 | 19490 | 13360 | 58.52  |
| 1379 | 14804 | 10185 | 58.92  |
| 1380 | 8694  | 17399 | 156.91 |
| 1381 | 8688  | 7210  | 71.65  |
| 1382 | 8673  | 5513  | 54.61  |
| 1383 | 17256 | 30700 | 151.71 |
| 1384 | 8581  | 6138  | 61.97  |
| 1385 | 8549  | 5953  | 59.91  |
| 1386 | 8539  | 5752  | 58.35  |
| 1387 | 8511  | 8020  | 79.28  |
| 1388 | 20310 | 12957 | 55.38  |
| 1389 | 11740 | 7636  | 55.94  |
| 1390 | 8501  | 176   | 0.97   |
| 1391 | 8481  | 6031  | 61.66  |
| 1392 | 14214 | 8395  | 50.82  |
| 1393 | 8468  | 87    | 0.34   |
| 1394 | 16089 | 12117 | 64.65  |
| 1395 | 11429 | 6426  | 46.22  |
| 1396 | 11302 | 7445  | 56.25  |

|      |       |       |        |
|------|-------|-------|--------|
| 1397 | 13966 | 8469  | 51.23  |
| 1398 | 8399  | 10121 | 102.66 |
| 1399 | 11892 | 9743  | 69.67  |
| 1400 | 8364  | 5324  | 55.39  |
| 1401 | 8359  | 5905  | 60.83  |
| 1402 | 8296  | 5532  | 57.21  |
| 1403 | 8268  | 5665  | 58.65  |
| 1404 | 8249  | 6217  | 63.17  |
| 1405 | 20615 | 11817 | 49.70  |
| 1406 | 8248  | 6653  | 69.61  |
| 1407 | 8234  | 5119  | 53.68  |
| 1408 | 8226  | 9046  | 94.29  |
| 1409 | 8223  | 10900 | 114.07 |
| 1410 | 14838 | 21350 | 120.06 |
| 1411 | 12776 | 9987  | 67.70  |
| 1412 | 8167  | 5518  | 58.65  |
| 1413 | 16273 | 9841  | 51.67  |
| 1414 | 8162  | 6273  | 66.97  |
| 1415 | 13869 | 8232  | 51.29  |
| 1416 | 8160  | 6459  | 66.45  |
| 1417 | 8152  | 5612  | 58.94  |
| 1418 | 23065 | 17787 | 63.81  |
| 1419 | 8143  | 8271  | 86.27  |
| 1420 | 14417 | 25790 | 153.27 |
| 1421 | 8138  | 21065 | 227.13 |
| 1422 | 16095 | 9478  | 50.39  |
| 1423 | 8123  | 6200  | 64.89  |
| 1424 | 18917 | 15959 | 72.30  |
| 1425 | 8039  | 8901  | 95.27  |
| 1426 | 8014  | 4874  | 52.29  |
| 1427 | 8007  | 5584  | 59.46  |
| 1428 | 10229 | 6153  | 51.02  |
| 1429 | 7970  | 7591  | 79.25  |
| 1430 | 12738 | 8983  | 60.51  |
| 1431 | 7947  | 5973  | 64.84  |
| 1432 | 7947  | 5337  | 58.74  |
| 1433 | 7945  | 64    | 0.24   |
| 1434 | 23746 | 15024 | 53.86  |
| 1435 | 25555 | 22614 | 74.37  |
| 1436 | 25179 | 17003 | 57.44  |
| 1437 | 20633 | 14824 | 61.30  |
| 1438 | 7785  | 5373  | 59.54  |
| 1439 | 13450 | 9904  | 62.04  |
| 1440 | 7754  | 4836  | 53.69  |
| 1441 | 7753  | 4733  | 52.37  |
| 1442 | 7737  | 72    | 0.31   |
| 1443 | 13457 | 17030 | 107.76 |
| 1444 | 7718  | 39    | 0.15   |
| 1445 | 17908 | 21869 | 103.97 |
| 1446 | 13262 | 7473  | 48.60  |
| 1447 | 7675  | 9865  | 109.87 |
| 1448 | 7664  | 5597  | 63.27  |
| 1449 | 10310 | 6033  | 49.78  |
| 1450 | 14312 | 8750  | 52.11  |
| 1451 | 13857 | 8364  | 52.19  |
| 1452 | 7623  | 10525 | 118.70 |
| 1453 | 9310  | 5508  | 50.66  |
| 1454 | 7577  | 8499  | 90.44  |
| 1455 | 7568  | 4563  | 52.22  |
| 1456 | 15131 | 24166 | 134.79 |
| 1457 | 22365 | 18719 | 70.85  |
| 1458 | 15214 | 18872 | 104.61 |
| 1459 | 7542  | 4901  | 55.85  |
| 1460 | 7509  | 12202 | 139.50 |
| 1461 | 14570 | 7449  | 44.12  |
| 1462 | 10552 | 5801  | 46.49  |
| 1463 | 7490  | 4636  | 52.48  |
| 1464 | 7480  | 4506  | 51.69  |

|      |       |         |          |
|------|-------|---------|----------|
| 1465 | 7476  | 9664    | 111.70   |
| 1466 | 7470  | 7656    | 85.69    |
| 1467 | 7457  | 40      | 0.23     |
| 1468 | 12782 | 8370    | 55.75    |
| 1469 | 14549 | 15492   | 91.06    |
| 1470 | 7415  | 3993    | 46.27    |
| 1471 | 22950 | 19536   | 72.63    |
| 1472 | 20766 | 19340   | 79.86    |
| 1473 | 7391  | 1220048 | 14399.82 |
| 1474 | 7368  | 6701    | 74.36    |
| 1475 | 7368  | 9732    | 114.00   |
| 1476 | 10149 | 6031    | 50.78    |
| 1477 | 13231 | 29855   | 179.77   |
| 1478 | 12238 | 19588   | 138.28   |
| 1479 | 7295  | 5251    | 60.65    |
| 1480 | 9361  | 7792    | 70.73    |
| 1481 | 20775 | 20542   | 85.33    |
| 1482 | 14451 | 10143   | 59.24    |
| 1483 | 7253  | 4671    | 55.62    |
| 1484 | 7251  | 163     | 1.01     |
| 1485 | 7214  | 69      | 0.53     |
| 1486 | 23377 | 22615   | 80.75    |
| 1487 | 7203  | 8534    | 103.05   |
| 1488 | 11128 | 14425   | 110.86   |
| 1489 | 7201  | 71      | 0.56     |
| 1490 | 7184  | 7397    | 87.82    |
| 1491 | 11000 | 12435   | 98.00    |
| 1492 | 7109  | 3646    | 42.96    |
| 1493 | 7089  | 11520   | 140.12   |
| 1494 | 7077  | 6108    | 73.79    |
| 1495 | 7064  | 5787    | 67.66    |
| 1496 | 23304 | 25096   | 91.05    |
| 1497 | 16567 | 10549   | 54.77    |
| 1498 | 7026  | 144     | 1.15     |
| 1499 | 12392 | 13150   | 89.34    |
| 1500 | 7020  | 5364    | 65.83    |
| 1501 | 7009  | 4965    | 60.21    |
| 1502 | 10702 | 18811   | 149.01   |
| 1503 | 22234 | 14577   | 56.48    |
| 1504 | 13078 | 7904    | 52.15    |
| 1505 | 18268 | 23174   | 107.79   |
| 1506 | 16224 | 9520    | 49.97    |
| 1507 | 9891  | 6014    | 51.22    |
| 1508 | 6851  | 4185    | 52.48    |
| 1509 | 8503  | 5568    | 56.83    |
| 1510 | 8569  | 7639    | 75.73    |
| 1511 | 6830  | 49      | 0.20     |
| 1512 | 15519 | 11346   | 60.99    |
| 1513 | 6800  | 9478    | 113.69   |
| 1514 | 8093  | 5168    | 54.44    |
| 1515 | 9002  | 6466    | 60.81    |
| 1516 | 11893 | 7438    | 54.36    |
| 1517 | 8056  | 4945    | 51.71    |
| 1518 | 6717  | 15708   | 197.04   |
| 1519 | 6691  | 4554    | 59.17    |
| 1520 | 6647  | 45      | 0.20     |
| 1521 | 6627  | 4202    | 54.56    |
| 1522 | 6613  | 3917    | 50.59    |
| 1523 | 6607  | 4906    | 64.12    |
| 1524 | 6605  | 4594    | 59.87    |
| 1525 | 6570  | 4173    | 54.25    |
| 1526 | 11897 | 8704    | 63.01    |
| 1527 | 6567  | 7557    | 98.71    |
| 1528 | 6556  | 4783    | 63.18    |
| 1529 | 14253 | 10066   | 60.71    |
| 1530 | 6535  | 13206   | 175.31   |
| 1531 | 6531  | 3997    | 53.15    |
| 1532 | 6530  | 53      | 0.22     |

|      |       |       |        |
|------|-------|-------|--------|
| 1533 | 18862 | 14612 | 65.34  |
| 1534 | 9969  | 7063  | 61.24  |
| 1535 | 6511  | 4214  | 56.12  |
| 1536 | 11802 | 15520 | 113.17 |
| 1537 | 6491  | 4185  | 55.61  |
| 1538 | 6471  | 3641  | 48.74  |
| 1539 | 6436  | 6901  | 91.44  |
| 1540 | 6432  | 3859  | 51.78  |
| 1541 | 6415  | 50    | 0.36   |
| 1542 | 6407  | 3890  | 52.55  |
| 1543 | 36691 | 30019 | 69.91  |
| 1544 | 8009  | 5146  | 55.22  |
| 1545 | 6368  | 4346  | 58.31  |
| 1546 | 7812  | 9412  | 101.78 |
| 1547 | 11731 | 7530  | 55.52  |
| 1548 | 6341  | 3617  | 48.17  |
| 1549 | 10959 | 9026  | 68.86  |
| 1550 | 6319  | 5330  | 72.37  |
| 1551 | 9107  | 6006  | 55.96  |
| 1552 | 10214 | 7488  | 63.08  |
| 1553 | 6281  | 85    | 0.46   |
| 1554 | 7977  | 10764 | 108.37 |
| 1555 | 8612  | 7027  | 65.67  |
| 1556 | 6235  | 3762  | 51.83  |
| 1557 | 9693  | 10635 | 92.74  |
| 1558 | 10127 | 9033  | 75.18  |
| 1559 | 6185  | 4205  | 58.94  |
| 1560 | 6166  | 4360  | 60.20  |
| 1561 | 7795  | 4951  | 54.35  |
| 1562 | 17609 | 11412 | 55.72  |
| 1563 | 6146  | 52    | 0.34   |
| 1564 | 21160 | 14646 | 58.87  |
| 1565 | 6117  | 3995  | 54.90  |
| 1566 | 6115  | 7460  | 106.24 |
| 1567 | 6115  | 4520  | 62.48  |
| 1568 | 8336  | 11732 | 115.36 |
| 1569 | 6107  | 62    | 0.42   |
| 1570 | 6092  | 110   | 0.92   |
| 1571 | 9481  | 11249 | 98.61  |
| 1572 | 6069  | 5875  | 80.57  |
| 1573 | 12581 | 6683  | 44.75  |
| 1574 | 7832  | 5381  | 55.64  |
| 1575 | 7720  | 6352  | 66.64  |
| 1576 | 9718  | 16162 | 143.52 |
| 1577 | 6005  | 131   | 1.25   |
| 1578 | 6005  | 522   | 6.07   |
| 1579 | 6002  | 3735  | 54.06  |
| 1580 | 5997  | 145   | 1.35   |
| 1581 | 14259 | 10108 | 61.09  |
| 1582 | 5973  | 3916  | 57.40  |
| 1583 | 5967  | 3745  | 50.85  |
| 1584 | 5940  | 3879  | 56.60  |
| 1585 | 15695 | 29156 | 156.60 |
| 1586 | 9350  | 8253  | 76.39  |
| 1587 | 5920  | 102   | 0.56   |
| 1588 | 5908  | 11420 | 167.16 |
| 1589 | 5894  | 3802  | 55.25  |
| 1590 | 5884  | 4086  | 60.40  |
| 1591 | 5878  | 6053  | 88.96  |
| 1592 | 5866  | 3719  | 54.87  |
| 1593 | 5862  | 74    | 0.83   |
| 1594 | 7218  | 6579  | 77.58  |
| 1595 | 5845  | 9707  | 135.56 |
| 1596 | 5845  | 7290  | 91.09  |
| 1597 | 21232 | 14646 | 58.78  |
| 1598 | 5830  | 3699  | 54.62  |
| 1599 | 9843  | 5585  | 48.78  |
| 1600 | 5819  | 3507  | 52.27  |

|      |       |       |        |
|------|-------|-------|--------|
| 1601 | 5807  | 3676  | 55.09  |
| 1602 | 25026 | 16676 | 55.73  |
| 1603 | 5780  | 6759  | 100.04 |
| 1604 | 10477 | 7041  | 57.51  |
| 1605 | 11421 | 13815 | 100.59 |
| 1606 | 13421 | 10147 | 64.21  |
| 1607 | 5692  | 7499  | 112.85 |
| 1608 | 10089 | 6931  | 58.85  |
| 1609 | 5678  | 4742  | 71.81  |
| 1610 | 5656  | 6986  | 106.69 |
| 1611 | 5644  | 3895  | 59.46  |
| 1612 | 7796  | 5549  | 61.28  |
| 1613 | 5636  | 3600  | 55.37  |
| 1614 | 5604  | 51    | 0.39   |
| 1615 | 12605 | 10606 | 71.92  |
| 1616 | 5594  | 3974  | 60.93  |
| 1617 | 15580 | 9007  | 49.03  |
| 1618 | 11544 | 23420 | 168.27 |
| 1619 | 8713  | 19803 | 193.17 |
| 1620 | 5532  | 3729  | 57.33  |
| 1621 | 11899 | 9934  | 70.09  |
| 1622 | 5510  | 4154  | 64.68  |
| 1623 | 5499  | 50    | 0.45   |
| 1624 | 8545  | 5716  | 57.28  |
| 1625 | 5490  | 90    | 1.06   |
| 1626 | 7647  | 13010 | 138.99 |
| 1627 | 7895  | 5871  | 63.61  |
| 1628 | 5464  | 4072  | 63.28  |
| 1629 | 13465 | 10043 | 63.74  |
| 1630 | 5445  | 6326  | 100.42 |
| 1631 | 5423  | 4329  | 67.89  |
| 1632 | 11348 | 7181  | 54.97  |
| 1633 | 5386  | 3946  | 62.73  |
| 1634 | 5377  | 3184  | 50.81  |
| 1635 | 5361  | 86    | 0.95   |
| 1636 | 5347  | 4009  | 63.77  |
| 1637 | 5337  | 3154  | 50.94  |
| 1638 | 5336  | 3450  | 56.04  |
| 1639 | 5330  | 4364  | 68.07  |
| 1640 | 7811  | 9577  | 104.47 |
| 1641 | 9832  | 6564  | 57.07  |
| 1642 | 5297  | 2927  | 47.54  |
| 1643 | 11257 | 14425 | 108.47 |
| 1644 | 9371  | 8248  | 75.50  |
| 1645 | 5281  | 4155  | 66.56  |
| 1646 | 5279  | 3001  | 47.55  |
| 1647 | 11865 | 19331 | 137.14 |
| 1648 | 5267  | 3334  | 54.25  |
| 1649 | 10527 | 20929 | 162.46 |
| 1650 | 5258  | 36    | 0.15   |
| 1651 | 5257  | 5991  | 97.49  |
| 1652 | 5253  | 3934  | 63.96  |
| 1653 | 5247  | 3942  | 64.28  |
| 1654 | 8644  | 4560  | 45.12  |
| 1655 | 5211  | 3349  | 55.40  |
| 1656 | 5188  | 2948  | 49.13  |
| 1657 | 16439 | 10306 | 53.67  |
| 1658 | 5179  | 64    | 0.59   |
| 1659 | 14629 | 8998  | 53.47  |
| 1660 | 5172  | 5986  | 95.38  |
| 1661 | 5168  | 6211  | 104.44 |
| 1662 | 5167  | 3971  | 65.20  |
| 1663 | 5159  | 3678  | 59.68  |
| 1664 | 6439  | 4959  | 65.55  |
| 1665 | 9445  | 15157 | 139.64 |
| 1666 | 5140  | 6407  | 106.14 |
| 1667 | 5134  | 12440 | 204.65 |
| 1668 | 14127 | 10319 | 62.79  |

|      |       |       |        |
|------|-------|-------|--------|
| 1669 | 5102  | 3164  | 51.25  |
| 1670 | 5097  | 3222  | 54.43  |
| 1671 | 6400  | 4171  | 56.25  |
| 1672 | 9079  | 5567  | 53.01  |
| 1673 | 5065  | 3599  | 61.71  |
| 1674 | 5059  | 3875  | 65.09  |
| 1675 | 5054  | 5760  | 98.04  |
| 1676 | 5050  | 3178  | 54.86  |
| 1677 | 7972  | 6747  | 68.59  |
| 1678 | 8836  | 8083  | 78.55  |
| 1679 | 5019  | 11921 | 204.54 |
| 1680 | 5019  | 4622  | 76.90  |
| 1681 | 4995  | 8533  | 145.58 |
| 1682 | 4994  | 2844  | 47.82  |
| 1683 | 4972  | 10209 | 171.18 |
| 1684 | 4955  | 3574  | 61.46  |
| 1685 | 4906  | 88    | 0.67   |
| 1686 | 4903  | 41    | 0.31   |
| 1687 | 4900  | 4822  | 83.96  |
| 1688 | 4889  | 32    | 0.16   |
| 1689 | 4889  | 4460  | 79.71  |
| 1690 | 12498 | 8212  | 55.99  |
| 1691 | 9108  | 5283  | 50.04  |
| 1692 | 10177 | 12245 | 103.93 |
| 1693 | 4850  | 7062  | 122.09 |
| 1694 | 7647  | 8348  | 94.44  |
| 1695 | 4839  | 4923  | 84.58  |
| 1696 | 4788  | 4012  | 66.91  |
| 1697 | 4762  | 3396  | 56.25  |
| 1698 | 7289  | 5679  | 64.99  |
| 1699 | 4757  | 5253  | 91.09  |
| 1700 | 4753  | 4296  | 71.07  |
| 1701 | 4733  | 6178  | 105.45 |
| 1702 | 7831  | 5071  | 55.84  |
| 1703 | 8075  | 6534  | 67.93  |
| 1704 | 9955  | 9278  | 79.43  |
| 1705 | 4673  | 58    | 0.35   |
| 1706 | 4673  | 3038  | 56.17  |
| 1707 | 4671  | 5941  | 109.86 |
| 1708 | 4648  | 59    | 0.57   |
| 1709 | 7213  | 5404  | 60.16  |
| 1710 | 4633  | 4451  | 80.14  |
| 1711 | 8053  | 6989  | 74.28  |
| 1712 | 4575  | 20    | 0.18   |
| 1713 | 4574  | 6217  | 114.82 |
| 1714 | 9272  | 11287 | 97.68  |
| 1715 | 4567  | 44    | 0.24   |
| 1716 | 4562  | 38    | 0.24   |
| 1717 | 4562  | 2200  | 40.39  |
| 1718 | 6981  | 9843  | 119.31 |
| 1719 | 4527  | 2830  | 54.35  |
| 1720 | 14029 | 18965 | 110.21 |
| 1721 | 4514  | 61    | 0.65   |
| 1722 | 6454  | 4257  | 55.78  |
| 1723 | 4472  | 3159  | 61.38  |
| 1724 | 4462  | 6207  | 121.16 |
| 1725 | 6720  | 4162  | 53.92  |
| 1726 | 4446  | 302   | 4.13   |
| 1727 | 4435  | 2472  | 47.70  |
| 1728 | 4404  | 5114  | 93.64  |
| 1729 | 4400  | 2691  | 53.20  |
| 1730 | 4398  | 3212  | 64.02  |
| 1731 | 5598  | 3486  | 53.17  |
| 1732 | 4357  | 36    | 0.34   |
| 1733 | 4352  | 3649  | 70.89  |
| 1734 | 11591 | 10011 | 72.67  |
| 1735 | 8509  | 6696  | 63.28  |
| 1736 | 4321  | 45    | 0.52   |

|      |       |       |        |
|------|-------|-------|--------|
| 1737 | 4320  | 21    | 0.15   |
| 1738 | 4315  | 4585  | 87.78  |
| 1739 | 4288  | 4609  | 91.84  |
| 1740 | 4284  | 2391  | 48.09  |
| 1741 | 4279  | 2568  | 51.98  |
| 1742 | 6470  | 3174  | 42.16  |
| 1743 | 4221  | 4964  | 101.03 |
| 1744 | 13676 | 9275  | 56.13  |
| 1745 | 4200  | 4470  | 88.42  |
| 1746 | 4190  | 66    | 0.78   |
| 1747 | 4188  | 3213  | 67.67  |
| 1748 | 11053 | 5880  | 44.50  |
| 1749 | 9956  | 11813 | 97.81  |
| 1750 | 4166  | 3865  | 60.09  |
| 1751 | 7096  | 3104  | 37.02  |
| 1752 | 6335  | 3505  | 46.38  |
| 1753 | 7204  | 7294  | 86.34  |
| 1754 | 4131  | 2608  | 54.91  |
| 1755 | 4116  | 2450  | 50.52  |
| 1756 | 4116  | 174   | 3.17   |
| 1757 | 4110  | 54    | 0.47   |
| 1758 | 4105  | 2898  | 60.92  |
| 1759 | 4086  | 5151  | 109.54 |
| 1760 | 4070  | 5774  | 119.44 |
| 1761 | 4067  | 4338  | 91.20  |
| 1762 | 8283  | 7616  | 78.04  |
| 1763 | 4060  | 7956  | 162.53 |
| 1764 | 11654 | 11253 | 78.35  |
| 1765 | 5555  | 5426  | 79.85  |
| 1766 | 10810 | 10444 | 82.41  |
| 1767 | 13050 | 14369 | 88.61  |
| 1768 | 4013  | 14183 | 285.43 |
| 1769 | 3998  | 5342  | 114.54 |
| 1770 | 7802  | 5802  | 63.37  |
| 1771 | 12758 | 17162 | 113.04 |
| 1772 | 5828  | 4350  | 64.15  |
| 1773 | 3953  | 22    | 0.22   |
| 1774 | 3952  | 26    | 0.22   |
| 1775 | 5197  | 4202  | 67.81  |
| 1776 | 11471 | 7892  | 58.18  |
| 1777 | 3926  | 51    | 0.54   |
| 1778 | 3925  | 2392  | 52.23  |
| 1779 | 7973  | 4920  | 51.78  |
| 1780 | 9966  | 14131 | 118.62 |
| 1781 | 6823  | 6944  | 78.38  |
| 1782 | 3881  | 2995  | 67.32  |
| 1783 | 5607  | 3313  | 50.55  |
| 1784 | 7348  | 5428  | 63.20  |
| 1785 | 3813  | 6745  | 149.33 |
| 1786 | 3813  | 2267  | 50.47  |
| 1787 | 9753  | 7157  | 60.31  |
| 1788 | 7123  | 5154  | 61.27  |
| 1789 | 6445  | 6449  | 80.91  |
| 1790 | 6209  | 5504  | 75.56  |
| 1791 | 3760  | 2183  | 49.53  |
| 1792 | 3746  | 28    | 0.28   |
| 1793 | 4958  | 8090  | 132.84 |
| 1794 | 3719  | 4277  | 98.81  |
| 1795 | 3711  | 2507  | 58.46  |
| 1796 | 6829  | 4671  | 59.10  |
| 1797 | 3647  | 3193  | 75.07  |
| 1798 | 8836  | 8151  | 75.78  |
| 1799 | 3634  | 2503  | 59.13  |
| 1800 | 6235  | 4065  | 56.13  |
| 1801 | 3612  | 39    | 0.44   |
| 1802 | 3607  | 3380  | 81.02  |
| 1803 | 5698  | 5180  | 77.27  |
| 1804 | 3598  | 2278  | 55.05  |

|      |       |       |        |
|------|-------|-------|--------|
| 1805 | 3596  | 132   | 2.48   |
| 1806 | 3596  | 1889  | 45.09  |
| 1807 | 3587  | 5280  | 122.19 |
| 1808 | 9627  | 5099  | 45.55  |
| 1809 | 5279  | 5915  | 93.95  |
| 1810 | 7142  | 4706  | 54.84  |
| 1811 | 6639  | 9242  | 113.95 |
| 1812 | 3539  | 4101  | 99.83  |
| 1813 | 3512  | 2542  | 63.42  |
| 1814 | 3508  | 7712  | 177.73 |
| 1815 | 3508  | 2206  | 54.06  |
| 1816 | 3504  | 2761  | 67.89  |
| 1817 | 3487  | 43    | 0.66   |
| 1818 | 7203  | 5887  | 70.90  |
| 1819 | 3479  | 5563  | 139.48 |
| 1820 | 3477  | 2231  | 55.32  |
| 1821 | 3470  | 38    | 0.34   |
| 1822 | 3433  | 2128  | 54.90  |
| 1823 | 5354  | 3029  | 47.23  |
| 1824 | 9045  | 9493  | 88.40  |
| 1825 | 5887  | 7262  | 104.42 |
| 1826 | 3401  | 3331  | 83.73  |
| 1827 | 3393  | 30    | 0.24   |
| 1828 | 9006  | 5351  | 51.91  |
| 1829 | 3360  | 1801  | 44.56  |
| 1830 | 7058  | 12314 | 131.49 |
| 1831 | 3352  | 3384  | 79.90  |
| 1832 | 3340  | 2247  | 58.32  |
| 1833 | 3337  | 6648  | 166.71 |
| 1834 | 3333  | 2523  | 64.04  |
| 1835 | 3326  | 52    | 0.57   |
| 1836 | 3324  | 10520 | 262.72 |
| 1837 | 5196  | 3671  | 60.97  |
| 1838 | 4814  | 3913  | 68.87  |
| 1839 | 3308  | 1965  | 50.57  |
| 1840 | 6328  | 3746  | 49.63  |
| 1841 | 5506  | 3788  | 59.01  |
| 1842 | 3300  | 1715  | 44.64  |
| 1843 | 3296  | 5583  | 142.04 |
| 1844 | 12839 | 19089 | 119.64 |
| 1845 | 5890  | 3602  | 52.88  |
| 1846 | 3286  | 2142  | 55.11  |
| 1847 | 3272  | 4080  | 106.98 |
| 1848 | 7177  | 7809  | 93.37  |
| 1849 | 3248  | 30    | 0.41   |
| 1850 | 5478  | 8016  | 122.73 |
| 1851 | 3224  | 28    | 0.38   |
| 1852 | 3224  | 72    | 1.22   |
| 1853 | 3195  | 2550  | 63.52  |
| 1854 | 3181  | 41    | 0.37   |
| 1855 | 3174  | 36    | 0.45   |
| 1856 | 3168  | 30    | 0.24   |
| 1857 | 3155  | 1797  | 48.81  |
| 1858 | 3136  | 5932  | 161.32 |
| 1859 | 7269  | 6932  | 81.09  |
| 1860 | 3126  | 37    | 0.29   |
| 1861 | 3124  | 14    | 0.24   |
| 1862 | 8722  | 5982  | 58.68  |
| 1863 | 5880  | 4819  | 70.94  |
| 1864 | 3089  | 2341  | 65.29  |
| 1865 | 7840  | 5062  | 52.93  |
| 1866 | 7649  | 25685 | 282.68 |
| 1867 | 3048  | 25    | 0.20   |
| 1868 | 3043  | 2635  | 72.46  |
| 1869 | 3024  | 4342  | 121.59 |
| 1870 | 5734  | 3024  | 45.33  |
| 1871 | 3006  | 31    | 0.45   |
| 1872 | 2990  | 1833  | 53.14  |



|      |      |       |        |
|------|------|-------|--------|
| 1873 | 2981 | 2637  | 69.11  |
| 1874 | 2977 | 4098  | 120.08 |
| 1875 | 2968 | 4904  | 141.83 |
| 1876 | 5404 | 6014  | 93.27  |
| 1877 | 4869 | 5154  | 89.41  |
| 1878 | 2943 | 1704  | 49.26  |
| 1879 | 2937 | 81    | 1.60   |
| 1880 | 2929 | 17    | 0.24   |
| 1881 | 2921 | 1849  | 51.04  |
| 1882 | 2915 | 40    | 0.68   |
| 1883 | 2913 | 39    | 0.60   |
| 1884 | 2902 | 24    | 0.25   |
| 1885 | 2899 | 1568  | 45.08  |
| 1886 | 2895 | 1940  | 57.69  |
| 1887 | 5012 | 9196  | 153.27 |
| 1888 | 5632 | 6167  | 84.08  |
| 1889 | 2860 | 80    | 1.56   |
| 1890 | 6210 | 4093  | 56.24  |
| 1891 | 5342 | 3216  | 51.55  |
| 1892 | 2854 | 2739  | 80.38  |
| 1893 | 2849 | 57    | 1.39   |
| 1894 | 2848 | 1434  | 43.06  |
| 1895 | 2848 | 40    | 0.59   |
| 1896 | 2842 | 2415  | 73.14  |
| 1897 | 4155 | 2822  | 54.47  |
| 1898 | 2825 | 2470  | 75.54  |
| 1899 | 2823 | 32    | 0.66   |
| 1900 | 2813 | 2909  | 88.23  |
| 1901 | 7789 | 5723  | 63.01  |
| 1902 | 2801 | 1261  | 38.58  |
| 1903 | 4524 | 3548  | 64.68  |
| 1904 | 2780 | 2038  | 62.77  |
| 1905 | 2775 | 2922  | 89.03  |
| 1906 | 2763 | 6460  | 186.73 |
| 1907 | 2763 | 1724  | 53.98  |
| 1908 | 2755 | 24    | 0.47   |
| 1909 | 2753 | 1704  | 52.75  |
| 1910 | 2751 | 40    | 0.63   |
| 1911 | 2749 | 1896  | 53.38  |
| 1912 | 2740 | 1674  | 52.18  |
| 1913 | 2733 | 12883 | 392.43 |
| 1914 | 5465 | 6295  | 94.94  |
| 1915 | 2721 | 3343  | 107.91 |
| 1916 | 2719 | 1830  | 58.92  |
| 1917 | 2719 | 1767  | 55.51  |
| 1918 | 2713 | 43    | 0.69   |
| 1919 | 2712 | 2277  | 72.96  |
| 1920 | 4170 | 3943  | 81.24  |
| 1921 | 2701 | 2110  | 55.80  |
| 1922 | 2691 | 7077  | 223.59 |
| 1923 | 2679 | 1595  | 49.53  |
| 1924 | 6120 | 4948  | 68.18  |
| 1925 | 2670 | 1694  | 54.82  |
| 1926 | 2664 | 1528  | 49.12  |
| 1927 | 2664 | 1782  | 55.87  |
| 1928 | 7065 | 5605  | 67.16  |
| 1929 | 2659 | 3464  | 106.05 |
| 1930 | 2652 | 1574  | 50.89  |
| 1931 | 9734 | 7245  | 62.63  |
| 1932 | 2646 | 1699  | 54.16  |
| 1933 | 2643 | 1914  | 62.39  |
| 1934 | 4299 | 2609  | 50.18  |
| 1935 | 2631 | 12    | 0.25   |
| 1936 | 4276 | 3722  | 72.35  |
| 1937 | 2607 | 5     | 0.09   |
| 1938 | 4912 | 5245  | 86.96  |
| 1939 | 2596 | 32    | 0.50   |
| 1940 | 2593 | 15    | 0.13   |

|      |      |      |        |
|------|------|------|--------|
| 1941 | 4295 | 8320 | 160.96 |
| 1942 | 2578 | 2216 | 73.59  |
| 1943 | 2576 | 4127 | 136.00 |
| 1944 | 5031 | 7585 | 128.61 |
| 1945 | 4728 | 2349 | 43.14  |
| 1946 | 2549 | 1294 | 43.82  |
| 1947 | 4654 | 2350 | 43.19  |
| 1948 | 8436 | 5705 | 57.21  |
| 1949 | 2543 | 20   | 0.21   |
| 1950 | 2536 | 2724 | 91.61  |
| 1951 | 2532 | 22   | 0.55   |
| 1952 | 2530 | 9    | 0.12   |
| 1953 | 3626 | 2970 | 69.43  |
| 1954 | 7447 | 6759 | 75.31  |
| 1955 | 8374 | 9600 | 96.82  |
| 1956 | 2524 | 2214 | 74.85  |
| 1957 | 5259 | 4968 | 76.65  |
| 1958 | 2520 | 10   | 0.26   |
| 1959 | 2518 | 8190 | 261.63 |
| 1960 | 2516 | 1663 | 57.62  |
| 1961 | 2510 | 1629 | 56.30  |
| 1962 | 2508 | 30   | 0.47   |
| 1963 | 2504 | 6440 | 218.08 |
| 1964 | 2503 | 2149 | 73.07  |
| 1965 | 2499 | 5690 | 194.72 |
| 1966 | 2499 | 30   | 0.28   |
| 1967 | 2499 | 1436 | 47.88  |
| 1968 | 2498 | 2140 | 70.29  |
| 1969 | 2479 | 16   | 0.12   |
| 1970 | 2478 | 37   | 0.84   |
| 1971 | 2432 | 1570 | 56.11  |
| 1972 | 2421 | 1423 | 51.42  |
| 1973 | 2411 | 23   | 0.51   |
| 1974 | 2409 | 24   | 0.69   |
| 1975 | 2403 | 21   | 0.19   |
| 1976 | 2399 | 8    | 0.09   |
| 1977 | 2397 | 18   | 0.25   |
| 1978 | 3851 | 2602 | 56.32  |
| 1979 | 2389 | 2543 | 92.05  |
| 1980 | 2371 | 1334 | 48.57  |
| 1981 | 2370 | 1481 | 53.49  |
| 1982 | 2366 | 16   | 0.32   |
| 1983 | 2341 | 2043 | 69.03  |
| 1984 | 2340 | 1284 | 48.38  |
| 1985 | 2334 | 1368 | 50.35  |
| 1986 | 3812 | 4752 | 106.86 |
| 1987 | 2311 | 1594 | 59.92  |
| 1988 | 2301 | 15   | 0.14   |
| 1989 | 2289 | 1062 | 40.77  |
| 1990 | 2277 | 32   | 0.57   |
| 1991 | 2277 | 10   | 0.14   |
| 1992 | 2274 | 2541 | 92.82  |
| 1993 | 4163 | 2623 | 54.31  |
| 1994 | 2254 | 1104 | 41.93  |
| 1995 | 2245 | 32   | 0.66   |
| 1996 | 3983 | 2810 | 56.77  |
| 1997 | 4057 | 3733 | 78.27  |
| 1998 | 2225 | 2817 | 108.68 |
| 1999 | 2220 | 1719 | 65.78  |
| 2000 | 2218 | 1508 | 57.74  |
| 2001 | 4462 | 6708 | 125.26 |
| 2002 | 2215 | 28   | 0.39   |
| 2003 | 2211 | 3821 | 136.37 |
| 2004 | 2203 | 22   | 0.66   |
| 2005 | 2200 | 18   | 0.56   |
| 2006 | 2194 | 21   | 0.62   |
| 2007 | 3910 | 1863 | 40.79  |
| 2008 | 2190 | 5874 | 222.07 |

|      |      |      |        |
|------|------|------|--------|
| 2009 | 2185 | 10   | 0.15   |
| 2010 | 4322 | 7478 | 146.01 |
| 2011 | 2174 | 1597 | 63.21  |
| 2012 | 2173 | 30   | 0.74   |
| 2013 | 2172 | 2636 | 103.73 |
| 2014 | 2160 | 1292 | 51.66  |
| 2015 | 2159 | 3529 | 132.72 |
| 2016 | 2150 | 30   | 0.84   |
| 2017 | 2147 | 20   | 0.29   |
| 2018 | 2136 | 3455 | 138.55 |
| 2019 | 2127 | 52   | 0.97   |
| 2020 | 2127 | 3551 | 139.19 |
| 2021 | 2117 | 69   | 1.37   |
| 2022 | 2117 | 13   | 0.38   |
| 2023 | 2113 | 952  | 39.28  |
| 2024 | 4468 | 3148 | 59.66  |
| 2025 | 2105 | 1496 | 61.68  |
| 2026 | 2098 | 5786 | 231.29 |
| 2027 | 4477 | 3783 | 68.73  |
| 2028 | 2090 | 1818 | 65.60  |
| 2029 | 2088 | 1869 | 78.09  |
| 2030 | 2085 | 10   | 0.11   |
| 2031 | 2084 | 37   | 0.62   |
| 2032 | 2081 | 1618 | 60.93  |
| 2033 | 2074 | 1259 | 52.86  |
| 2034 | 2055 | 1404 | 58.16  |
| 2035 | 2053 | 5830 | 239.34 |
| 2036 | 2044 | 70   | 2.41   |
| 2037 | 3763 | 2879 | 64.69  |
| 2038 | 2038 | 2317 | 98.00  |
| 2039 | 2037 | 1263 | 53.77  |
| 2040 | 2027 | 35   | 1.06   |
| 2041 | 2026 | 2867 | 120.01 |
| 2042 | 2016 | 2823 | 122.10 |
| 2043 | 2016 | 50   | 1.59   |
| 2044 | 2013 | 3319 | 142.20 |
| 2045 | 2012 | 11   | 0.30   |
| 2046 | 5295 | 5145 | 81.55  |
| 2047 | 2007 | 15   | 0.21   |
| 2048 | 2007 | 3235 | 137.91 |
| 2049 | 2006 | 2198 | 92.13  |
| 2050 | 1997 | 9    | 0.24   |
| 2051 | 1995 | 9    | 0.15   |
| 2052 | 6509 | 3902 | 50.63  |
| 2053 | 1986 | 5868 | 243.47 |
| 2054 | 1977 | 1242 | 51.19  |
| 2055 | 1973 | 1891 | 81.37  |
| 2056 | 1973 | 1424 | 61.23  |
| 2057 | 1969 | 1835 | 75.50  |
| 2058 | 1955 | 2729 | 117.99 |
| 2059 | 1952 | 2930 | 126.28 |
| 2060 | 1951 | 1812 | 74.58  |
| 2061 | 5716 | 4504 | 65.88  |
| 2062 | 1948 | 26   | 0.54   |
| 2063 | 1946 | 8    | 0.13   |
| 2064 | 1939 | 2768 | 108.00 |
| 2065 | 1937 | 18   | 0.38   |
| 2066 | 1930 | 1275 | 58.34  |
| 2067 | 1911 | 813  | 36.63  |
| 2068 | 3669 | 3639 | 85.37  |
| 2069 | 1900 | 12   | 0.35   |
| 2070 | 1900 | 4769 | 213.41 |
| 2071 | 1896 | 1412 | 63.99  |
| 2072 | 1884 | 1047 | 47.44  |
| 2073 | 1880 | 1562 | 71.31  |
| 2074 | 1874 | 2403 | 111.91 |
| 2075 | 5785 | 7599 | 110.97 |
| 2076 | 1866 | 21   | 0.50   |

|      |      |      |        |
|------|------|------|--------|
| 2077 | 1865 | 16   | 0.38   |
| 2078 | 1853 | 28   | 0.94   |
| 2079 | 1852 | 2362 | 110.78 |
| 2080 | 1848 | 25   | 0.60   |
| 2081 | 1847 | 1927 | 88.60  |
| 2082 | 1846 | 42   | 1.46   |
| 2083 | 1844 | 20   | 0.88   |
| 2084 | 1834 | 21   | 0.66   |
| 2085 | 1833 | 941  | 43.57  |
| 2086 | 1832 | 2820 | 125.52 |
| 2087 | 1828 | 1715 | 65.00  |
| 2088 | 1824 | 4864 | 184.09 |
| 2089 | 1824 | 40   | 1.71   |
| 2090 | 1823 | 23   | 0.62   |
| 2091 | 1820 | 14   | 0.18   |
| 2092 | 1820 | 1043 | 48.85  |
| 2093 | 1818 | 1085 | 51.72  |
| 2094 | 1814 | 1203 | 58.87  |
| 2095 | 1814 | 10   | 0.11   |
| 2096 | 3306 | 3485 | 90.73  |
| 2097 | 1809 | 1101 | 53.05  |
| 2098 | 1809 | 1420 | 67.47  |
| 2099 | 1806 | 2337 | 105.54 |
| 2100 | 1805 | 1320 | 63.82  |
| 2101 | 1797 | 1103 | 53.26  |
| 2102 | 1793 | 3635 | 90.05  |
| 2103 | 1792 | 2115 | 100.10 |
| 2104 | 1792 | 957  | 46.16  |
| 2105 | 1791 | 48   | 1.94   |
| 2106 | 1789 | 1102 | 53.93  |
| 2107 | 1787 | 2150 | 102.80 |
| 2108 | 1786 | 8    | 0.14   |
| 2109 | 1780 | 2213 | 109.12 |
| 2110 | 1780 | 2177 | 90.82  |
| 2111 | 1770 | 4642 | 206.20 |
| 2112 | 1769 | 3    | 0.04   |
| 2113 | 1754 | 1791 | 68.64  |
| 2114 | 1753 | 19   | 0.41   |
| 2115 | 1751 | 6    | 0.07   |
| 2116 | 1747 | 882  | 42.51  |
| 2117 | 1747 | 5618 | 238.66 |
| 2118 | 1735 | 1109 | 52.99  |
| 2119 | 1724 | 13   | 0.41   |
| 2120 | 1716 | 2231 | 111.45 |
| 2121 | 1712 | 1522 | 75.58  |
| 2122 | 1707 | 1107 | 55.13  |
| 2123 | 1704 | 1232 | 60.29  |
| 2124 | 1704 | 874  | 44.14  |
| 2125 | 1699 | 2067 | 100.13 |
| 2126 | 1696 | 2    | 0.06   |
| 2127 | 1692 | 2250 | 108.86 |
| 2128 | 1691 | 43   | 1.35   |
| 2129 | 1690 | 4    | 0.09   |
| 2130 | 3914 | 2134 | 46.21  |
| 2131 | 1680 | 2028 | 102.70 |
| 2132 | 1679 | 3276 | 156.72 |
| 2133 | 1656 | 725  | 36.07  |
| 2134 | 1652 | 1189 | 60.85  |
| 2135 | 1652 | 21   | 0.90   |
| 2136 | 1649 | 1058 | 53.73  |
| 2137 | 3448 | 1871 | 46.77  |
| 2138 | 1646 | 1365 | 65.25  |
| 2139 | 1644 | 1213 | 55.21  |
| 2140 | 1638 | 1021 | 53.29  |
| 2141 | 1636 | 14   | 0.51   |
| 2142 | 1632 | 4479 | 220.51 |
| 2143 | 1631 | 15   | 0.37   |
| 2144 | 1620 | 15   | 0.47   |

|      |      |      |        |
|------|------|------|--------|
| 2145 | 1615 | 742  | 38.83  |
| 2146 | 1607 | 17   | 0.51   |
| 2147 | 1592 | 1397 | 73.89  |
| 2148 | 1588 | 8    | 0.14   |
| 2149 | 1586 | 6    | 0.07   |
| 2150 | 1580 | 1723 | 91.67  |
| 2151 | 1567 | 2158 | 115.14 |
| 2152 | 3056 | 3519 | 96.09  |
| 2153 | 1556 | 743  | 40.92  |
| 2154 | 1544 | 535  | 31.22  |
| 2155 | 1542 | 947  | 52.19  |
| 2156 | 1542 | 3140 | 160.28 |
| 2157 | 3207 | 1449 | 38.33  |
| 2158 | 1541 | 856  | 46.57  |
| 2159 | 1540 | 28   | 1.09   |
| 2160 | 2962 | 6049 | 154.45 |
| 2161 | 1539 | 333  | 14.72  |
| 2162 | 1538 | 12   | 0.30   |
| 2163 | 1535 | 2541 | 141.22 |
| 2164 | 2796 | 2273 | 68.28  |
| 2165 | 1522 | 842  | 46.71  |
| 2166 | 1521 | 719  | 41.94  |
| 2167 | 1517 | 738  | 41.01  |
| 2168 | 1513 | 1130 | 55.96  |
| 2169 | 1512 | 1141 | 66.26  |
| 2170 | 1509 | 1174 | 67.44  |
| 2171 | 1506 | 1473 | 86.08  |
| 2172 | 1506 | 3624 | 175.67 |
| 2173 | 1503 | 892  | 51.89  |
| 2174 | 1503 | 26   | 1.33   |
| 2175 | 1499 | 26   | 1.04   |
| 2176 | 1495 | 3992 | 228.98 |
| 2177 | 1493 | 2619 | 135.59 |
| 2178 | 3138 | 1598 | 42.24  |
| 2179 | 1488 | 1100 | 61.72  |
| 2180 | 1487 | 28   | 1.26   |
| 2181 | 1479 | 13   | 0.34   |
| 2182 | 1476 | 850  | 48.98  |
| 2183 | 1476 | 754  | 42.78  |
| 2184 | 1473 | 4079 | 212.14 |
| 2185 | 1471 | 708  | 42.43  |
| 2186 | 1471 | 787  | 46.38  |
| 2187 | 1466 | 22   | 0.72   |
| 2188 | 1464 | 758  | 43.66  |
| 2189 | 1459 | 39   | 1.98   |
| 2190 | 1458 | 4862 | 285.41 |
| 2191 | 1454 | 1579 | 89.53  |
| 2192 | 1451 | 1436 | 82.84  |
| 2193 | 1446 | 1327 | 76.64  |
| 2194 | 1437 | 19   | 0.73   |
| 2195 | 1437 | 759  | 46.83  |
| 2196 | 1436 | 1151 | 69.31  |
| 2197 | 1431 | 11   | 0.54   |
| 2198 | 1428 | 9155 | 466.97 |
| 2199 | 1426 | 2882 | 166.14 |
| 2200 | 1424 | 23   | 0.84   |
| 2201 | 1422 | 1292 | 62.97  |
| 2202 | 1420 | 13   | 0.19   |
| 2203 | 1413 | 969  | 58.85  |
| 2204 | 1412 | 1060 | 62.78  |
| 2205 | 1406 | 757  | 46.81  |
| 2206 | 1401 | 13   | 0.37   |
| 2207 | 1389 | 7    | 0.12   |
| 2208 | 1378 | 15   | 0.30   |
| 2209 | 1378 | 16   | 0.64   |
| 2210 | 1374 | 748  | 44.80  |
| 2211 | 1372 | 6    | 0.26   |
| 2212 | 1366 | 17   | 0.62   |

|      |      |      |        |
|------|------|------|--------|
| 2213 | 3113 | 3635 | 94.22  |
| 2214 | 1359 | 1120 | 71.50  |
| 2215 | 1352 | 668  | 42.61  |
| 2216 | 1350 | 3610 | 214.45 |
| 2217 | 1345 | 735  | 46.77  |
| 2218 | 1342 | 664  | 42.89  |
| 2219 | 1334 | 146  | 2.49   |
| 2220 | 1329 | 671  | 43.59  |
| 2221 | 1327 | 777  | 50.65  |
| 2222 | 1321 | 21   | 0.98   |
| 2223 | 1320 | 782  | 47.53  |
| 2224 | 1314 | 13   | 0.40   |
| 2225 | 1310 | 677  | 43.49  |
| 2226 | 1304 | 1462 | 91.78  |
| 2227 | 1295 | 17   | 0.75   |
| 2228 | 1293 | 9    | 0.32   |
| 2229 | 1291 | 1266 | 84.45  |
| 2230 | 1291 | 1138 | 73.50  |
| 2231 | 1286 | 15   | 0.56   |
| 2232 | 1285 | 807  | 54.29  |
| 2233 | 1274 | 31   | 1.53   |
| 2234 | 1269 | 16   | 0.93   |
| 2235 | 1266 | 9    | 0.52   |
| 2236 | 1266 | 1365 | 91.75  |
| 2237 | 1265 | 10   | 0.28   |
| 2238 | 1265 | 637  | 42.71  |
| 2239 | 1263 | 584  | 39.92  |
| 2240 | 1261 | 1422 | 95.92  |
| 2241 | 1260 | 706  | 46.82  |
| 2242 | 1260 | 561  | 38.24  |
| 2243 | 1260 | 16   | 0.73   |
| 2244 | 1260 | 656  | 45.23  |
| 2245 | 1252 | 622  | 41.57  |
| 2246 | 1251 | 915  | 60.79  |
| 2247 | 1251 | 10   | 0.35   |
| 2248 | 1244 | 582  | 41.75  |
| 2249 | 1236 | 2809 | 172.36 |
| 2250 | 1233 | 826  | 57.00  |
| 2251 | 1228 | 746  | 50.43  |
| 2252 | 1223 | 3435 | 237.04 |
| 2253 | 1223 | 737  | 52.74  |
| 2254 | 1219 | 9    | 0.28   |
| 2255 | 1215 | 5166 | 336.56 |
| 2256 | 1209 | 1237 | 87.23  |
| 2257 | 1201 | 971  | 66.70  |
| 2258 | 1201 | 4    | 0.11   |
| 2259 | 1197 | 54   | 3.08   |
| 2260 | 1195 | 4995 | 342.41 |
| 2261 | 1195 | 2873 | 203.20 |
| 2262 | 1193 | 2845 | 197.71 |
| 2263 | 1192 | 837  | 61.95  |
| 2264 | 1190 | 27   | 1.53   |
| 2265 | 1186 | 4    | 0.24   |
| 2266 | 1184 | 4606 | 298.99 |
| 2267 | 1182 | 7    | 0.36   |
| 2268 | 1181 | 11   | 0.24   |
| 2269 | 1176 | 11   | 0.53   |
| 2270 | 1176 | 9    | 0.47   |
| 2271 | 1172 | 17   | 0.63   |
| 2272 | 1167 | 1126 | 82.84  |
| 2273 | 1166 | 604  | 43.94  |
| 2274 | 1160 | 17   | 0.69   |
| 2275 | 1160 | 9    | 0.27   |
| 2276 | 1157 | 5071 | 336.13 |
| 2277 | 1148 | 24   | 1.58   |
| 2278 | 1148 | 674  | 49.45  |
| 2279 | 1144 | 7    | 0.30   |
| 2280 | 1143 | 12   | 0.47   |

|      |      |      |        |
|------|------|------|--------|
| 2281 | 1142 | 1525 | 113.90 |
| 2282 | 1140 | 11   | 0.62   |
| 2283 | 1139 | 635  | 46.56  |
| 2284 | 1129 | 647  | 50.01  |
| 2285 | 1129 | 738  | 56.58  |
| 2286 | 1127 | 10   | 0.43   |
| 2287 | 1123 | 8    | 0.14   |
| 2288 | 1120 | 16   | 0.60   |
| 2289 | 1120 | 13   | 0.54   |
| 2290 | 1120 | 7    | 0.34   |
| 2291 | 1119 | 9    | 0.55   |
| 2292 | 1118 | 610  | 45.98  |
| 2293 | 1111 | 20   | 0.92   |
| 2294 | 1110 | 25   | 1.20   |
| 2295 | 1108 | 11   | 0.38   |
| 2296 | 1107 | 844  | 63.48  |
| 2297 | 1105 | 20   | 0.71   |
| 2298 | 1102 | 529  | 40.41  |
| 2299 | 1100 | 13   | 0.85   |
| 2300 | 1100 | 25   | 0.94   |
| 2301 | 1093 | 6    | 0.24   |
| 2302 | 1091 | 2464 | 181.51 |
| 2303 | 1087 | 4630 | 343.32 |
| 2304 | 1085 | 19   | 1.17   |
| 2305 | 1084 | 2    | 0.18   |
| 2306 | 1082 | 739  | 57.94  |
| 2307 | 1082 | 685  | 55.08  |
| 2308 | 1077 | 627  | 49.60  |
| 2309 | 1075 | 2206 | 175.57 |
| 2310 | 1074 | 4    | 0.08   |
| 2311 | 1073 | 28   | 1.86   |
| 2312 | 1071 | 1318 | 103.64 |
| 2313 | 1070 | 2067 | 150.98 |
| 2314 | 1066 | 616  | 50.74  |
| 2315 | 1065 | 4324 | 321.14 |
| 2316 | 1063 | 702  | 58.06  |
| 2317 | 1062 | 506  | 41.27  |
| 2318 | 1056 | 487  | 39.71  |
| 2319 | 1051 | 2324 | 183.62 |
| 2320 | 1050 | 8    | 0.45   |
| 2321 | 1048 | 15   | 0.88   |
| 2322 | 1046 | 0    | 0.00   |
| 2323 | 1041 | 1815 | 142.56 |
| 2324 | 1039 | 1240 | 100.23 |
| 2325 | 1038 | 14   | 0.86   |
| 2326 | 1037 | 1    | 0.08   |
| 2327 | 1036 | 660  | 55.52  |
| 2328 | 1036 | 5    | 0.30   |
| 2329 | 1034 | 10   | 0.71   |
| 2330 | 1033 | 945  | 71.89  |
| 2331 | 1026 | 30   | 1.02   |
| 2332 | 1023 | 11   | 0.31   |
| 2333 | 1021 | 496  | 42.28  |
| 2334 | 1021 | 30   | 1.65   |
| 2335 | 1020 | 25   | 1.59   |
| 2336 | 1017 | 29   | 1.04   |
| 2337 | 1017 | 702  | 61.68  |
| 2338 | 1016 | 6    | 0.19   |
| 2339 | 1015 | 599  | 51.00  |
| 2340 | 1012 | 11   | 0.68   |
| 2341 | 1011 | 19   | 0.82   |
| 2342 | 1011 | 549  | 47.31  |
| 2343 | 1010 | 699  | 60.14  |
| 2344 | 1008 | 19   | 0.61   |
| 2345 | 1008 | 2380 | 168.89 |
| 2346 | 1007 | 2511 | 210.47 |
| 2347 | 1006 | 6    | 0.40   |
| 2348 | 1005 | 655  | 55.37  |

|      |      |       |         |
|------|------|-------|---------|
| 2349 | 1002 | 14204 | 1140.49 |
| 2350 | 1001 | 772   | 67.40   |
| 2351 | 1000 | 4     | 0.14    |
