# Supplementary material for: An aerobic eukaryotic parasite with functional mitochondria that likely lacks a mitochondrial genome
Source: PubMed Central journal article supplement — Sci Adv. 2019 Apr 24;5(4):eaav1110. doi: 10.1126/sciadv.aav1110 (PMC6482013; doi:10.1126/sciadv.aav1110), 2019-04-24
Supplement: aav1110_SM.pdf [file aav1110_SM.pdf]

## Supplementary Materials for

### **An aerobic eukaryotic parasite with functional mitochondria that likely lacks a mitochondrial genome**

Uwe John\*, Yameng Lu, Sylke Wohlrab, Marco Groth, Jan Janouškovec, Gurjeet S. Kohli, Felix C. Mark, Ulf Bickmeyer, Sarah Farhat, Marius Felder, Stephan Frickenhaus, Laure Guillou, Patrick J. Keeling, Ahmed Moustafa, Betina M. Porce, Klaus Valentin, Gernot Glöckner\*

\*Corresponding author. Email: uwe.john@awi.de (U.J.); gernot.gloeckner@uni-koeln.de (G.G.)

Published 24 April 2019, *Sci. Adv.* **5**, eaav1110 (2019)

DOI: 10.1126/sciadv.aav1110

#### **The PDF file includes:**

Fig. S1. Flow cytometry.

Fig. S2. Alignment of 5' ends of transcripts of *A. ceratii* showing SL and relict SL repeats.

Fig. S3. The distribution of intron sizes in *A. ceratii* genes.

Fig. S4. Expansion of gene numbers per metabolic pathway in *A. ceratii*.

Fig. S5. Phylogenetic analysis of prokaryotic and eukaryotic PKS and FAS.

Fig. S6. Predicted evolution of tetrapyrrole biosynthesis in *A. ceratii* and other dinoflagellates.

Fig. S7. Confocal microscopy images of *A. ceratii* and *A. catenella* as a control.

Fig. S8. *CoxI* phylogeny.

Fig. S9. Plot obtained by assembling the PE dataset including spike-in mitochondrial reads of *P. polycephalum*.

Fig. S10. Plot obtained by assembling the PE dataset including spike-in mitochondrial reads of *P. polycephalum*.

Fig. S11. Model of the mitochondrial respiratory chain in *A. ceratii*.

Table S1. Enriched gene families.

Table S2. Number of genes encoding transcription factors in genomes/transcriptomes of 48 genera.

Table S3. SL detected in the genome of *A. ceratii*.

Table S4. Illumina RNAseq reads of *A. ceratii* at 6 and 96 hours during the infection.

Table S5. A list of enzymes involved in various metabolic pathways in the *A. ceratii* genome.

Table S6. Mitochondrion respiration assay.

Table S7. The search for components of the electron transport system of *A. ceratii*.

Table S8. Mitochondrial functions encoded in the genome of *A. ceratii*.

Table S9. Primers used in this study to amplify *cox* from *A. ceratii* cDNA.

Table S10. Primers used to amplify various shikimate pathway transcripts from *A. ceratii* cDNA.

**Other Supplementary Material for this manuscript includes the following:**

(available at [advances.sciencemag.org/cgi/content/full/5/4/eaav1110/DC1](http://advances.sciencemag.org/cgi/content/full/5/4/eaav1110/DC1))

Data file S1 (.gz format). Contigs of the *A. ceratii* AT5.2 genome.

Data file S2 (.bz2 format). Scaffolds of the *A. ceratii* AT5.2 genome.

Data file S3 (.bz2 format). GFF of the *A. ceratii* AT5.2 genome.

Data file S4 (.gz format). Predicted protein sequences of the *A. ceratii* AT5.2 genome.

Data file S5 (.pdf format). Assembly statistics of the *A. ceratii* AT5.2 genome.

Data file S6 (Microsoft Excel format). Annotation table generated via Trinotate for the *A. ceratii* AT5.2 genome.

## Figures

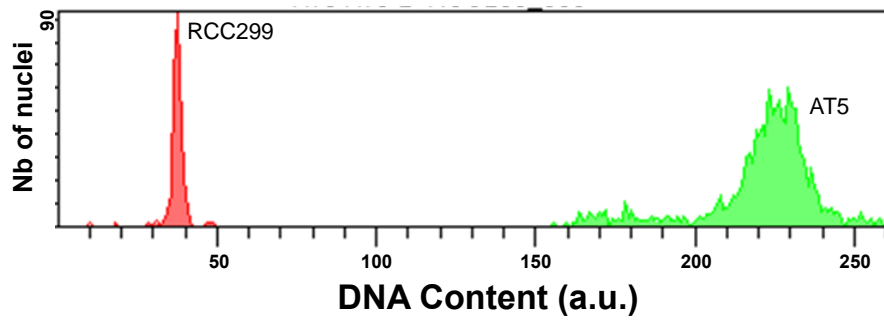

**Fig. S1. Flow cytometry.** Genome size estimation via flow cytometry. The genome size of *Amoebophrya ceratii* was calculated to be ~120Mb (green) compared to *Micromonas pusilla* RCC299 (1C = 20.9 fg). The predicted genome size resulting from the assembly (87.7 Mb) is smaller than the size indicated by flow cytometry (~120 Mb). This size difference between assembly and flow cytometry is partially due to repetitive elements, which collapse in the assembly to small contigs. Nuclei were extracted by mixing 50  $\mu$ L of a culture of freshly produced dinospore with 450  $\mu$ L of twice diluted NIB buffer, containing SYBR Green-I at final concentration of 1/5 000. Two  $\mu$ L of RCC299 in exponential growing phase were added as internal reference. The mixture was then incubated at least for 30 min in the dark, before being analysed using a FACS Canto II flow cytometer equipped with a 488 nm laser and the standard filter setup. Signal was triggered on the green fluorescence. The ratio between the mean distribution of the dinospores and the RCC299 is used for the evaluation of the DNA content.

A

Spliced leader CCGTAGCCATTTTGGCTCAAG

g18355.t1 GCCATTTTGGCTCAAG  
g6020.t1 CGTAGCCATTTTGGC  
g13239.t1 GCCATTTTGGCTC  
g11183.t1 GCCATTTTGGCTC  
g3407.t1 CGTAGCCATTTTGG

B

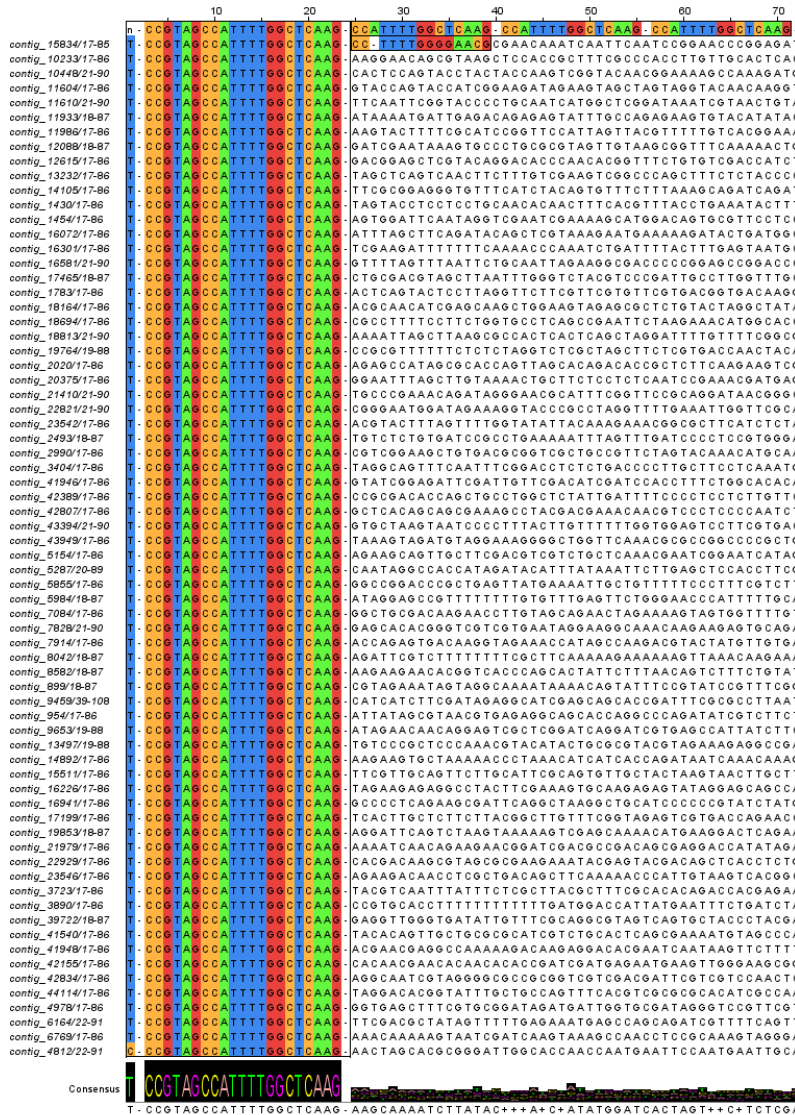

**Fig. S2. Alignment of 5' ends of transcripts of *A. ceratii* showing SL and relic SL repeats in (A) *A. ceratii* gene models and (B) the transcriptome dataset. The first sequence shows a reference SL consensus sequence. The calculated consensus sequence and the sequence logo are aligned under the transcripts.**

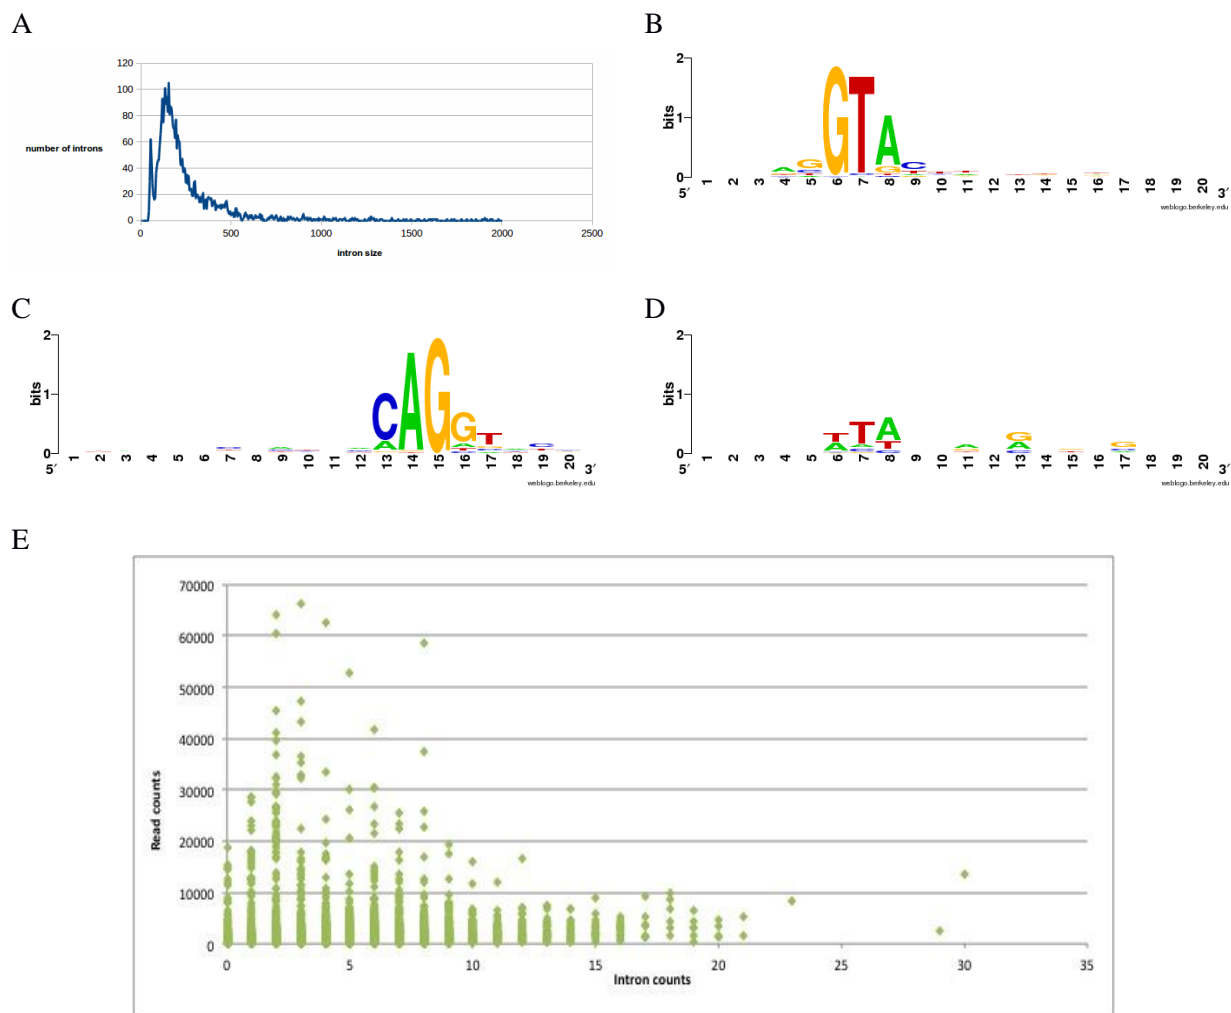

**Fig. S3. The distribution of intron sizes in *A. ceratii* genes.** (A) The distribution of intron sizes in *Amoebophrya ceratii* genes. Only introns confirmed by transcriptome data were taken into account to calculate donor-acceptor distances irrespective of predicted gene models. The mean length of introns is around 100 bases. A TopHat (Version 2.0.1) (<https://ccb.jhu.edu/software/tophat/index.shtml>) mapping of reads on the assembled scaffold data to resolve junction sites independently confirmed the gene-model based estimate of 51,066 introns in total. We defined consensus donor and acceptor sites of introns confirmed by transcripts: (B) donor site; (C) acceptor site; (D) splicing site AT type. Exon/intron boundaries were centered on the splice site (donors: position 5/6; acceptor: position 13/14). (E) Expression level dependency on intron number. RNAseq read counts were plotted against intron numbers per gene. *A. ceratii* also has some AT-AC splice boundaries, which are widely accepted to indicate U12 dependent splicing in eukaryotes.

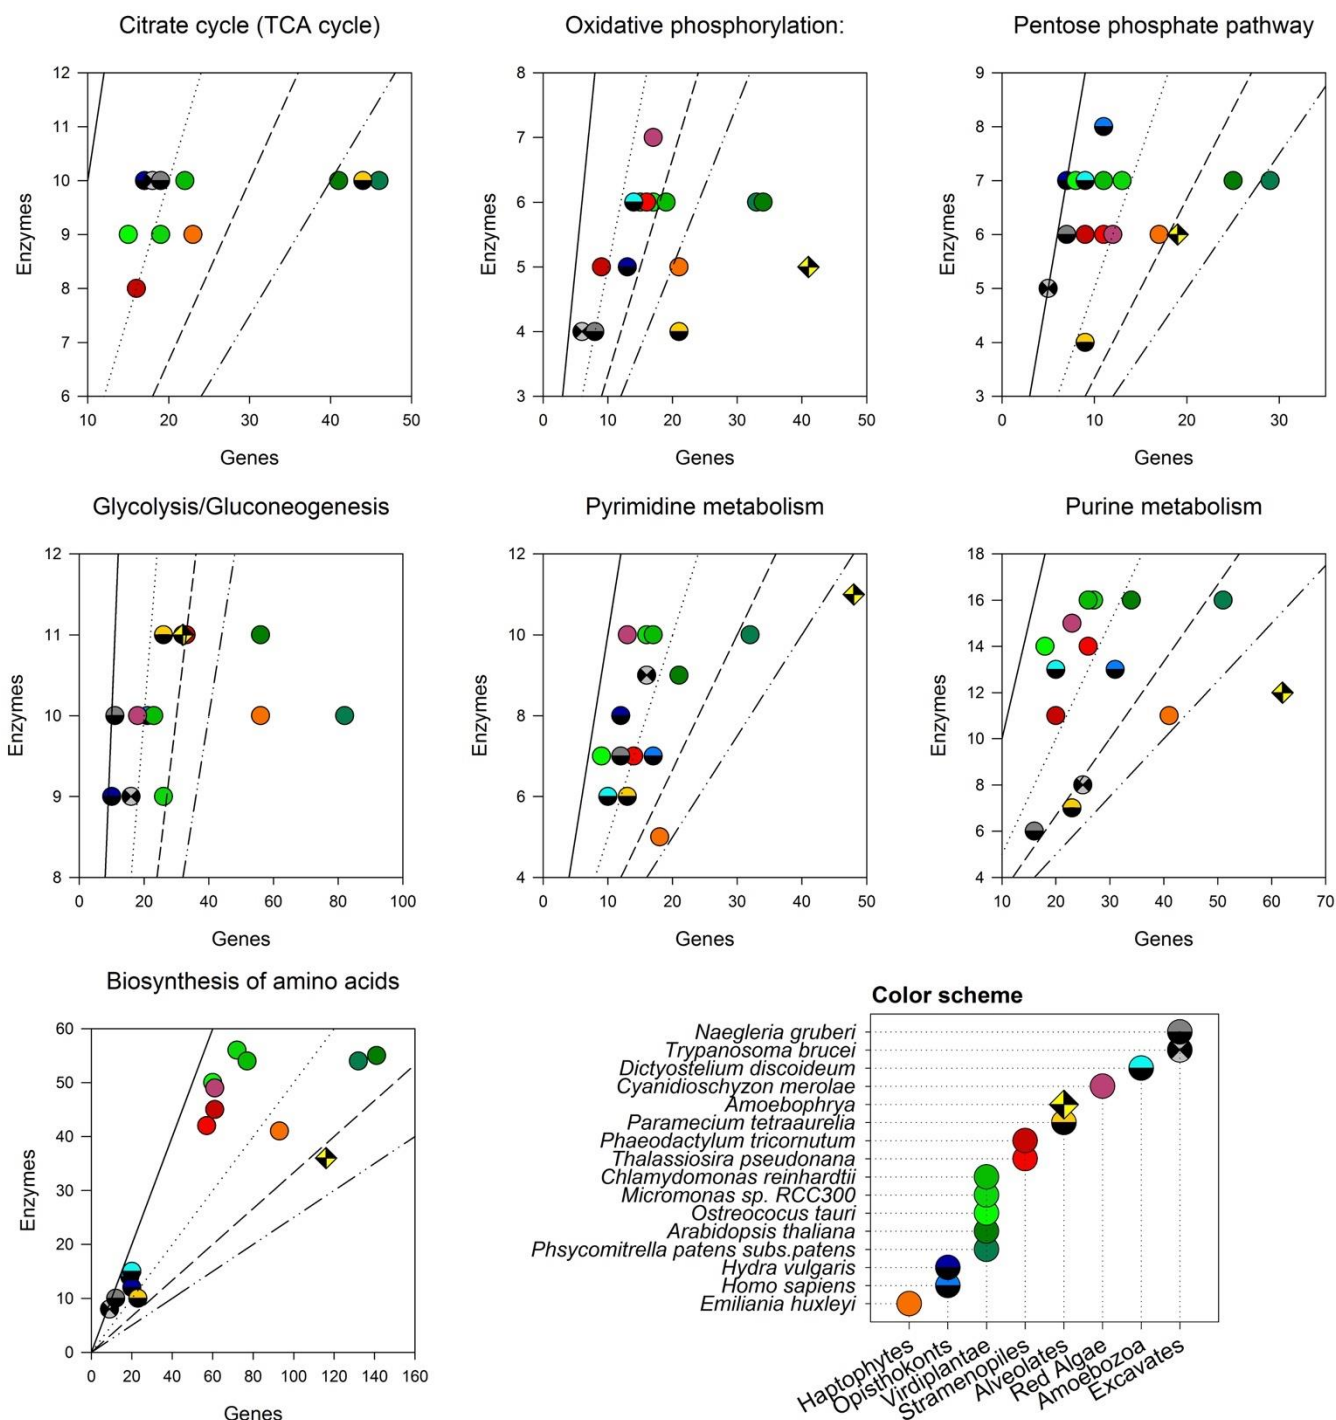

**Fig. S4. Expansion of gene numbers per metabolic pathway in *A. ceratii*.** Numbers were obtained from the Kyoto Encyclopedia of Genes and Genomes (KEGG database) and compared with the EC annotations of *A. ceratii* (combined from the Trinotate annotation (<http://trinotate.github.io/>) and KAAS annotation pipeline Moriya (<https://www.genome.jp/kegg/kaas/>)). For each species the numbers of genes per pathway were plotted against the number of essential enzymes in the respective pathway. Colours represent different taxonomic lineages, fill patterns different lifestyles (colour only: autotroph; half filled: heterotroph; quarter filled: parasitic).

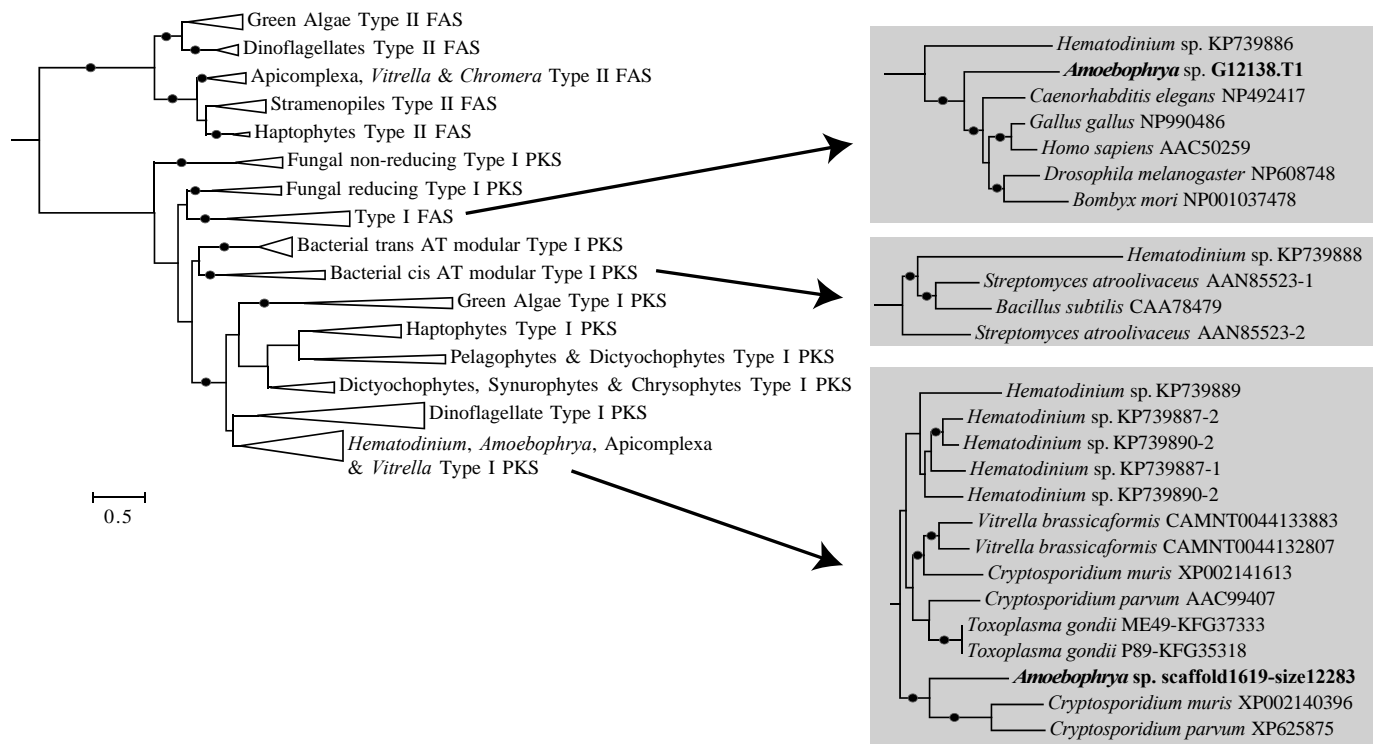

**Fig. S5. Phylogenetic analysis of prokaryotic and eukaryotic PKS and FAS.** Phylogenetic analysis of 26 type II 3-ketoacyl ACP synthase II and 74 type I ketosynthase domains from prokaryotic and eukaryotic polyketide synthase and fatty acid synthases, showing the position of each major group. To align sequences, MAFFT and ClustalW (within Geneious) were used and alignments were trimmed manually to ensure they spanned the same coding region of each enzyme. The final alignment had a length of 585. Maximum likelihood phylogenetic analysis was carried out using RAXML with 1000 bootstraps using the GAMMA and LG model of rate heterogeneity. Phylogenetic trees were visualised using Geneious (<https://www.geneious.com/>) and MEGA:Version 6 (<https://www.megasoftware.net/>). Solid circles indicate bootstrap values above 75.



Ancestor: early stage of endosymbiosis

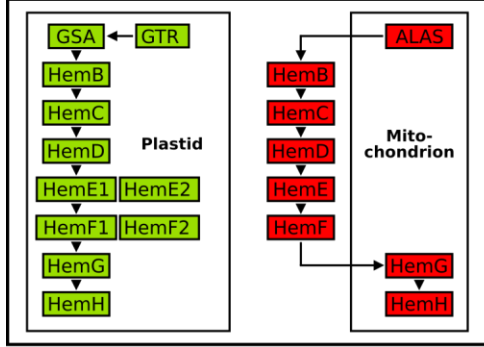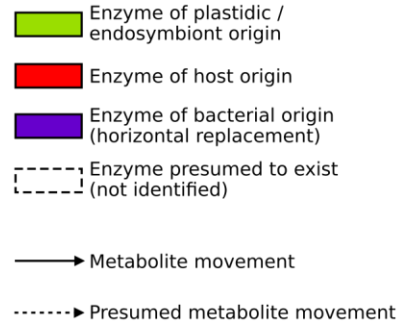

Ancestor of dinoflagellates

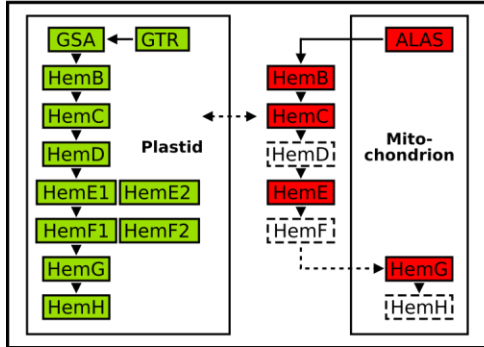

*Symbiodinium minutum*

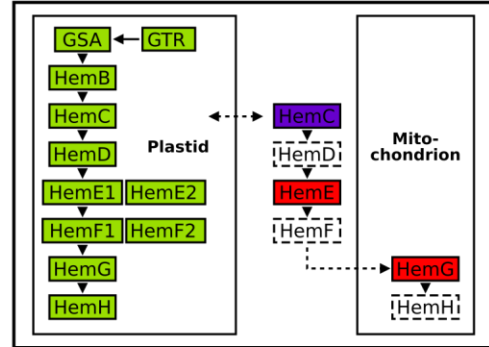

Ancestor of *Amoebophrya* + *Hematodinium*

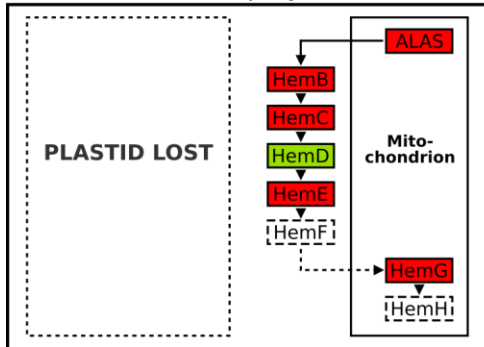

*Hematodinium* sp.

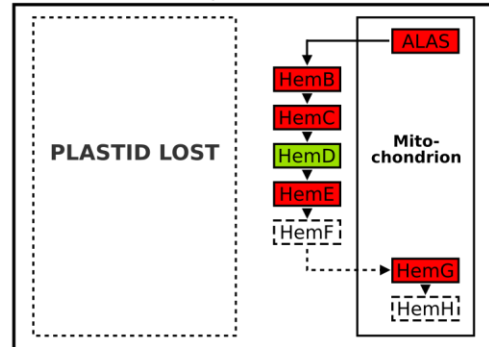

*Amoebophrya* sp.

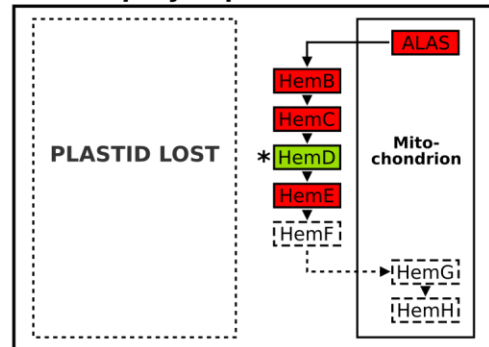

**Fig. S6. Predicted evolution of tetrapyrrole biosynthesis in *A. ceratii* and other dinoflagellates.** The *in silico* reconstruction combines the results of genome and transcriptome data searches, single-protein maximum likelihood phylogenies and N-terminal predictions of protein targeting (Materials and Methods). Enzymes are depicted by boxes color-coded as to their evolutionary origin. Lines and arrows show the movement and conversion of metabolites. All *A. ceratii* genes except HemE were expressed. ALAS = g4769, HemB = g9658, HemC = g11423, HemD = g15992, HemE = g5941 + g5942. A second HemD-like paralog was identified in *A. ceratii*, a putative pseudogene (g16908; shown by asterisk).



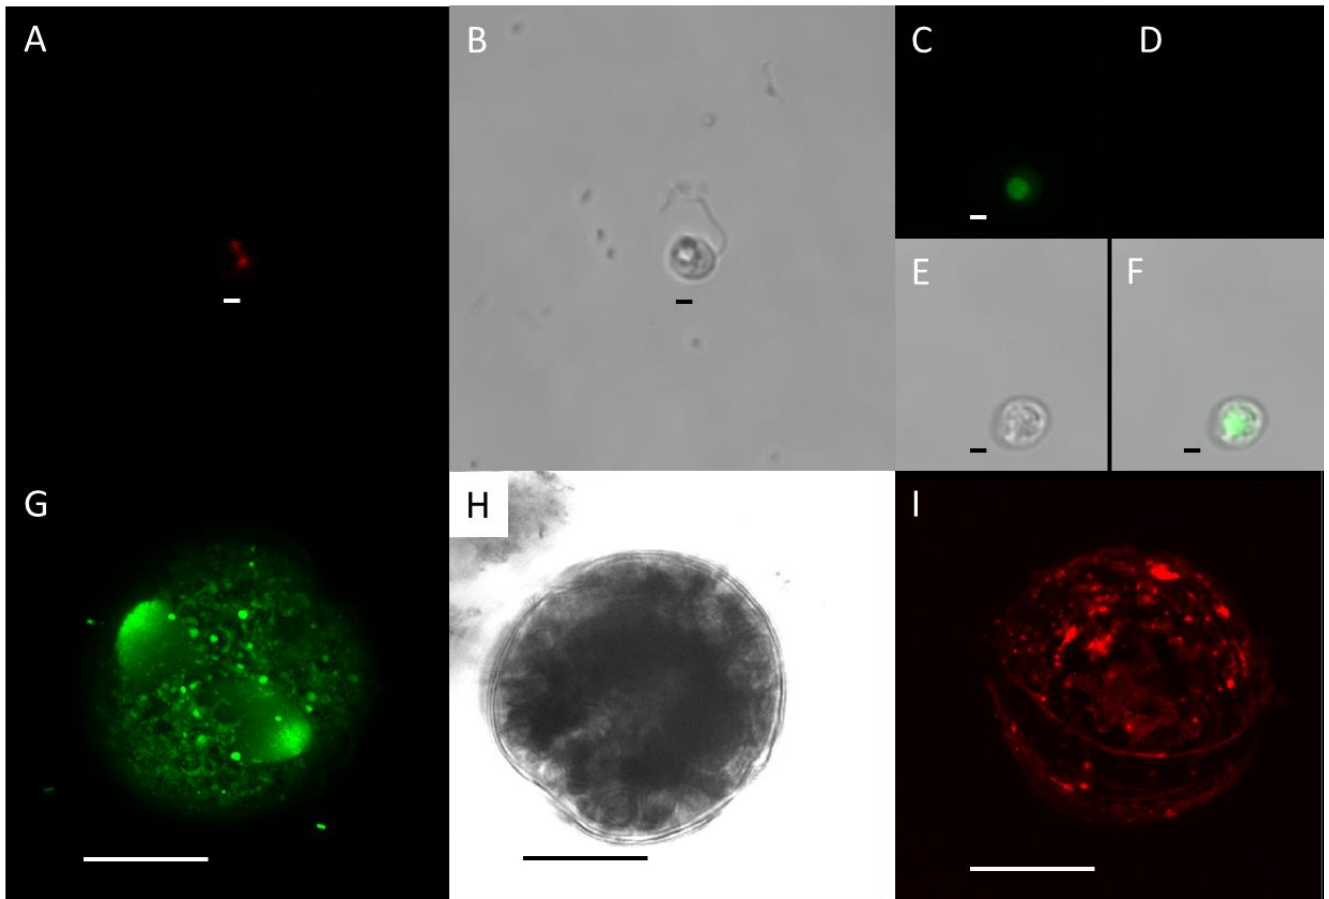

**Fig. S7. Confocal microscopy images of *A. ceratii* and *A. catenella* as a control.** The dyes Syto-13 and JC-10 possess overlapping fluorescence profiles, therefore cells are stained with one dye each. **A)** *A. ceratii* stained with JC-10, red fluorescence show two mitochondria. **B)** Image in transmission light of the same cell. **C)** *A. ceratii* stained with Syto 5 $\mu$ M showing green fluorescence nucleus. **D)** *A. ceratii* without stain (check for autofluorescence). **E)** *A. ceratii* image in transmission light. **F)** Overlay image of Syto fluorescence and transmission image. **G)** Syto stained DNA of *A. catenella*. **H)** Corresponding image in transmission light to (H). **I)** *A. catenella* stained with JC-10 red fluorescence show active organelles. More images in Figure 3.

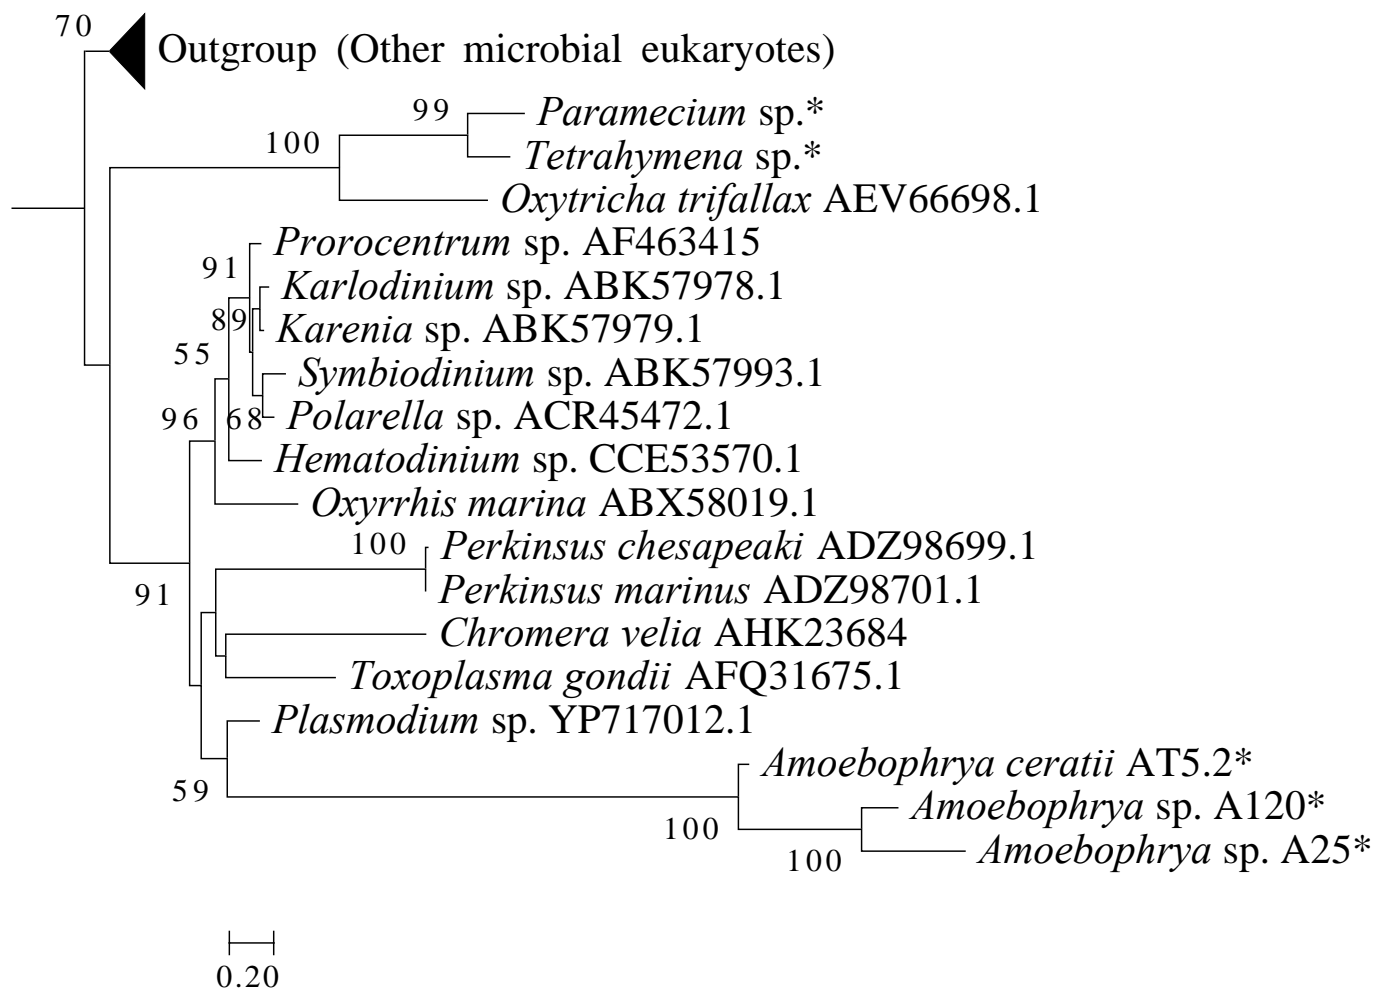

**Fig. S8. *CoxI* phylogeny.** Concatenated *coxI* gene fragments (g833 and g15932) used for mitochondrial phylogeny of 31 taxa were calculated from an alignment of *coxI* genes. Spuriously aligned sites of the original alignment were removed using Gblocks ([http://molevol.cmima.csic.es/castresana/Gblocks\\_server.html](http://molevol.cmima.csic.es/castresana/Gblocks_server.html)) to use only conserved sequences for the calculation of the phylogeny (200 AA after removal of spurious sites). The Maximum likelihood (ML) analysis (PROTGAMMAILGF, 1000 bootstrap replicates) was conducted with RAxML. The tree was rooted with algal mitochondria (13 taxa) outside the Alveolata. *coxI* fragments for the all three *Amoebophrya* strains were sourced from their reference genomes. *coxI* genes for all other dinoflagellates were recovered from various EST datasets. (\*) Sequences were obtained from their respective reference genomes.

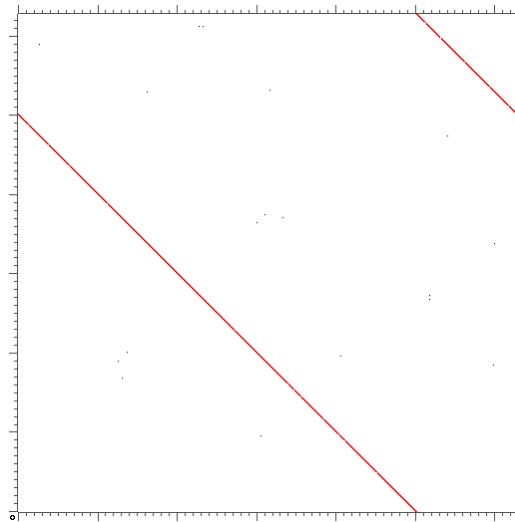

#### SEQUENCES, IMAGE DIMENSIONS

```
seq 1, x axis : contig_6535
seq 2, y axis : NC_002508.1 Physarum polycephalum mitochondrion, complete genome
len seq 1 : 62862 bp
len seq 2 : 62862 bp
picture size : 500x500, 250000 pixels
scaling x : 0.007954, 125.7 bases per pixel
scaling y : 0.007954, 125.7 bases per pixel
bp^2 per pixel : 15806
```

#### COMPARISON PRELUDE

```
tuple size : 9 (automatic)
tuple space : 262144
expected tuple inst. E(N_tuple_i|seq1,seq2) : 0.479599
expected hits E(N_tuple_i|seq1) * E(N_tuple_i|seq2) : 0.057504
tuple_overrep_cutoff (option -i) : 1.000000
tuple_throwoff : N_tuple_i > 2.00000
tuples ignored due to overrepresentation : 14114 (67620 fwd instances)
```

#### COMPARISON, IMAGE CONSTRUCTION

```
+ : min_value=0.0 max_value=5.0
- : min_value=0.0 max_value=70.0
cutoff method : adaptive, diagonal portion (option -A) 1.000000
cutoff method : adaptive, max. portion positive 0.004000
at most pixel to set : 1000
cutoff pixel score : >3.00000
tic step x (minor) : 1000 bp, 7.953931 pixels
tic step y (minor) : 1000 bp, 7.953931 pixels
pixels set : 999, portion 0.003996
```

**Fig. S9. Plot obtained by assembling the PE dataset including spike-in mitochondrial reads of *P. polycephalum*.** Tuple\_plot of contig\_6535 obtained by assembling the paired-end dataset including spike-in of simulated mitochondrial reads of *Physarum polycephalum* with a coverage of 226-fold. In order to check the theoretical ability to find mitochondrial sequences, paired-end reads of *Physarum polycephalum* (Genbank accession: NC\_002508) mitochondria were simulated using *maq* (<http://maq.sourceforge.net/maq-man.shtml>). Doing so the simulation was trained using *maq simutrain* by introducing the real paired-end data. Afterwards the simulated reads were created using *maq simulate* (parameter: -d 375 -s 50 -N NO\_OF\_READS -1 92 -2 86). Insert length as well as lengths of reads\_1 and reads\_2 were chosen to be similar to those of the real paired-end reads. Reads were simulated representing a coverage of 5-fold to around 500-fold (5, 11, 22, 33, 45, 56, 159, 226, 339, 556-fold), . Since the mitochondrion is circular the simulation was performed twice per dataset using different linearized mitochondrial reference sequences, e.g. for simulate 226-fold coverage dataset 80,000 read pairs are necessary. So the simulation was done twice creating 40,000 read pairs each. After the simulation the reads were concatenated with the real paired-end dataset and introduced in the *clc\_assembly\_cell* as described. Using BLAT the mitochondrion representing contigs were determined. Using tuple\_plot (<https://genome.leibniz-fli.de/software/>) the position and direction of contigs with respect to the mitochondrion was analysed. In summary assemblies of datasets of all coverages (except the 5-fold coverage dataset) resulted in a single contig representing the complete mitochondrial sequence (fig. S9, 226-fold coverage dataset). The assembly approach of the 5-fold coverage dataset resulted in 13 contigs which represent almost the complete mitochondrial sequence (fig. S10).

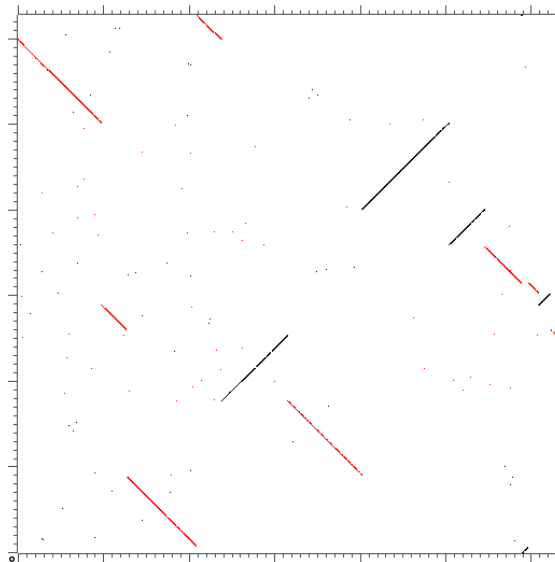

#### SEQUENCES, IMAGE DIMENSIONS

```
seq 1, x axis : assembly_contig_numbers_13
seq 2, y axis : NC_002508.1 Physarum polycephalum mitochondrion, complete genome
len seq 1 : 62834 bp
len seq 2 : 62862 bp
picture size : 499x500, 249500 pixels
scaling x : 0.007942, 125.9 bases per pixel
scaling y : 0.007954, 125.7 bases per pixel
bp^2 per pixel : 15831
```

#### COMPARISON PRELUDE

```
tuple size : 9 (automatic)
tuple space : 262144
expected tuple inst. E(N_tuple_i|seq1,seq2) : 0.479492
expected hits E(N_tuple_i|seq1) * E(N_tuple_i|seq2) : 0.057478
tuple_overrep_cutoff (option -i) : 1.000000
tuple_throwoff : N_tuple_i > 2.00000
tuples ignored due to overrepresentation : 13778 (68737 fwd instances)
```

#### COMPARISON, IMAGE CONSTRUCTION

```
+ : min_value=0.0 max_value=65.5
- : min_value=0.0 max_value=91.0
cutoff method : adaptive, diagonal portion (option -A) 1.000000
cutoff method : adaptive, max. portion positive 0.004003
at most pixel to set : 998
cutoff pixel score : >2.50000
tic step x (minor) : 1000 bp, 7.941560 pixels
tic step y (minor) : 1000 bp, 7.953931 pixels
pixels set : 992, portion 0.003976
```

**Fig. S10. Plot obtained by assembling the PE dataset including spike-in mitochondrial reads of *P. polycephalum*.** Tuple\_plot of 13 contigs obtained by assembling the paired-end dataset including spike-in of simulated mitochondrial reads of *Physarum polycephalum* with a coverage of 5-fold. In order to check the theoretical ability to find mitochondrial sequences, paired-end reads of *Physarum polycephalum* (Genbank accession: NC\_002508) mitochondria were simulated using *maq* (<http://maq.sourceforge.net/maq-man.shtml>). Doing so the simulation was trained using *maq simutrain* by introducing the real paired-end data. Afterwards the simulated reads were created using *maq simulate* (parameter: -d 375 -s 50 -N NO\_OF\_READS -1 92 -2 86). Insert length as well as lengths of reads\_1 and reads\_2 were chosen to be similar to those of the real paired-end reads. Reads were simulated representing a coverage of 5-fold to around 500-fold (5, 11, 22, 33, 45, 56, 159, 226, 339, 556-fold), . Since the mitochondrion is circular the simulation was performed twice per dataset using different linearized mitochondrial reference sequences, e.g. for simulate 226-fold coverage dataset 80,000 read pairs are necessary. So the simulation was done twice creating 40,000 read pairs each. After the simulation the reads were concatenated with the real paired-end dataset and introduced in the *clc\_assembly\_cell* as described. Using BLAT the mitochondrion representing contigs were determined. Using tuple\_plot (<https://genome.leibniz-fli.de/software/>) the position and direction of contigs with respect to the mitochondrion was analysed. In summary assemblies of datasets of all coverages (except the 5-fold coverage dataset) resulted in a single contig representing the complete mitochondrial sequence (fig. S9, 226-fold coverage dataset). The assembly approach of the 5-fold coverage dataset resulted in 13 contigs which represent almost the complete mitochondrial sequence (fig. S10).

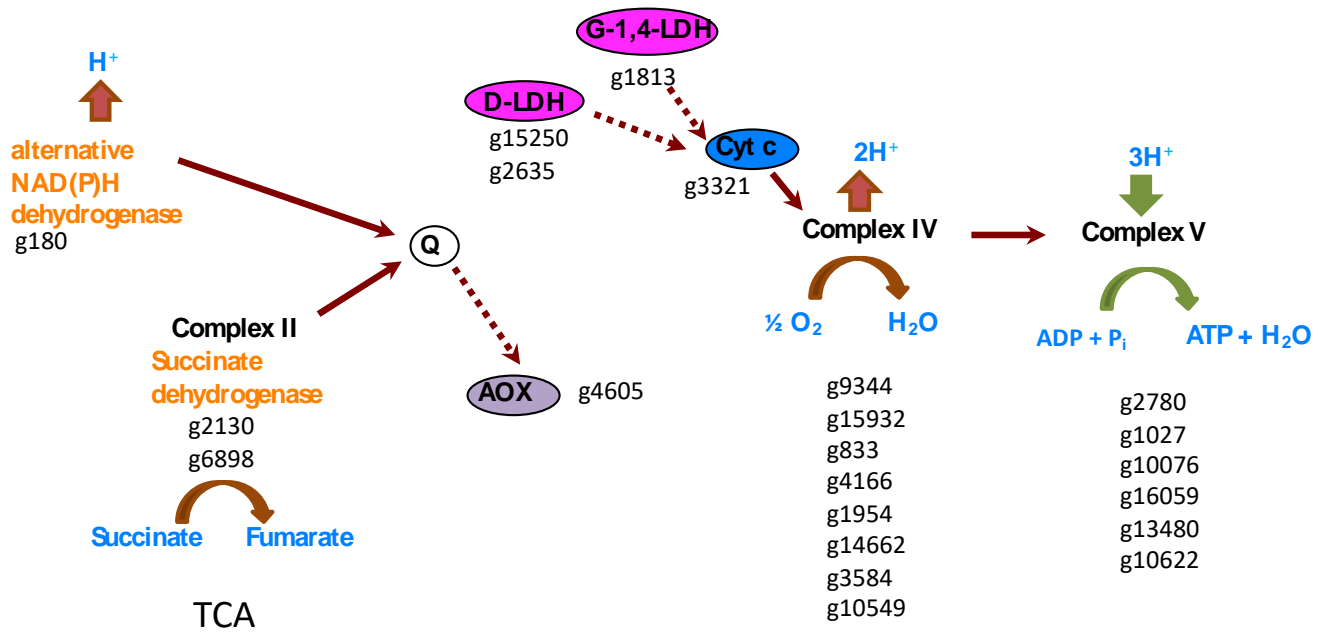

**Fig. S11. Model of the mitochondrial respiratory chain in *A. ceratii*** in accordance to Figure 5. Gene identifiers according to the *A. ceratii* database encoding components of complexes are shown below the complexes.

## Tables

**Table S1. Enriched gene families.** We clustered all predicted proteins using OrthoMCL (<http://www.orthomcl.org/orthomcl/>). The families (clusters) were then examined for functions according to their domain structure. Furthermore, we combined the gene families according to the functions of their members if the majority of members of a specific family contained the same indicative domain. Families without any definable function were combined to one group, which comprises the highest number of families and proteins. Among the most prominent functions found in families with at least 10 members in *Amoebophrya ceratii* are many transposon derived sequences followed by proteins involved in carbohydrate or protein binding. The prominent occurrence of carbohydrate degradation in this list indicates an important role of these functions in the parasites life cycle.

| Function                                             | Number of proteins | Number of families |
|------------------------------------------------------|--------------------|--------------------|
| Calcium binding                                      | 10                 | 1                  |
| Cation channel                                       | 11                 | 1                  |
| Nucleotide-diphospho-sugar transferase               | 12                 | 1                  |
| Galactosyltransferase                                | 13                 | 1                  |
| ABC transporter                                      | 16                 | 1                  |
| Peptidase                                            | 16                 | 1                  |
| Cell surface                                         | 21                 | 1                  |
| Phosphoesterase                                      | 24                 | 1                  |
| Cell cycle or growth phase-related regulation        | 32                 | 1                  |
| Kinase                                               | 32                 | 3                  |
| Protease or protease inhibitor                       | 32                 | 3                  |
| Cytoskeleton                                         | 36                 | 1                  |
| Detoxification and degradation                       | 44                 | 2                  |
| Carbohydrate degradation                             | 50                 | 3                  |
| Protein-protein or protein-carbohydrate interactions | 107                | 6                  |
| Transposon                                           | 499                | 12                 |
| No definition                                        | 1,424              | 76                 |

**Table S2. Number of genes encoding transcription factors in genomes/transcriptomes of 48 genera. (A).** In order to find protein domains that might function as transcription factors in *Amoebophrya ceratii*, the predicted proteins were searched using Pfam profiles (<https://pfam.xfam.org/>) and in total 57 unique protein domains that are described as being involved in gene regulation were detected. In order to compare these results, genomes/transcriptomes for 47 other microbial eukaryotic genera belonging to alveolates, Stramenopiles, Rhizaria, Haptophyta, Viridiplantae, Rhodophyta, Euglenids and Choanoflagellata were also screened for these 57 transcription factors. All other transcription factors except one were found in almost all other genera. One protein/transcription factor “PF06167- Glucose-regulated metallo-peptidase M90” was only found in the *A. ceratii* genome. B shows species used in this analysis.

A

| Organism (No. of peptides in library)                                                                                                                                 | Transcription Factors   |                                       |                          |                                |                                  |
|-----------------------------------------------------------------------------------------------------------------------------------------------------------------------|-------------------------|---------------------------------------|--------------------------|--------------------------------|----------------------------------|
|                                                                                                                                                                       | TF TFIIB repeat PF00382 | SNF2 family N-terminal domain PF00176 | Ubiquitin family PF00240 | DEAD/DEAH box helicase PF00270 | TATA-binding protein TBP PF00352 |
| <b>Alveolates (basal<sup>1</sup> and core<sup>2</sup> dinoflagellates, Ciliates<sup>3</sup>, Apicomplexa<sup>4</sup>, Vitrella<sup>5</sup>, Chromera<sup>6</sup>)</b> |                         |                                       |                          |                                |                                  |
| <i>Amoebophrya ceratii</i> * <sup>1</sup> (20969)                                                                                                                     | 1                       | 38                                    | 19                       | 88                             | 2                                |
| <i>Noctiluca scintillans</i> <sup>1</sup> (40911)                                                                                                                     | 2                       | 44                                    | 72                       | 92                             | 1                                |
| <i>Oxyrrhis marina</i> <sup>1</sup> (34417)                                                                                                                           | 0                       | 34                                    | 36                       | 71                             | 3                                |
| <i>Perkinsus marinus</i> * <sup>1</sup> (23654)                                                                                                                       | 6                       | 86                                    | 28                       | 124                            | 5                                |
| <i>Alexandrium catenella</i> <sup>2</sup> (1108345)                                                                                                                   | 3                       | 124                                   | 226                      | 179                            | 4                                |
| <i>Amphidinium carterae</i> <sup>2</sup> (36236)                                                                                                                      | 1                       | 56                                    | 85                       | 107                            | 1                                |
| <i>Cryptocodinium cohnii</i> <sup>2</sup> (48368)                                                                                                                     | 2                       | 70                                    | 66                       | 97                             | 2                                |
| <i>Gambierdiscus australes</i> <sup>2</sup> (83402)                                                                                                                   | 2                       | 112                                   | 147                      | 174                            | 2                                |
| <i>Gymnodinium catenatum</i> <sup>2</sup> (83508)                                                                                                                     | 2                       | 136                                   | 193                      | 260                            | 2                                |
| <i>Heterocapsa triquetra</i> <sup>2</sup> (57789)                                                                                                                     | 1                       | 52                                    | 68                       | 99                             | 1                                |
| <i>Karenia brevis</i> <sup>2</sup> (93029)                                                                                                                            | 2                       | 104                                   | 258                      | 193                            | 2                                |
| <i>Karlodinium micrum</i> <sup>2</sup> (58585)                                                                                                                        | 3                       | 94                                    | 155                      | 151                            | 1                                |
| <i>Kryptoperidinium foliaceum</i> <sup>2</sup> (162643)                                                                                                               | 3                       | 156                                   | 208                      | 249                            | 9                                |
| <i>Lingulodinium polyerda</i> <sup>2</sup> (99361)                                                                                                                    | 1                       | 118                                   | 201                      | 155                            | 3                                |
| <i>Polarella glacialis</i> <sup>2</sup> (59754)                                                                                                                       | 1                       | 118                                   | 97                       | 231                            | 0                                |
| <i>Scrippsiella hangoei</i> <sup>2</sup> (75339)                                                                                                                      | 1                       | 108                                   | 163                      | 188                            | 4                                |
| <i>Symbiodinium sp.</i> <sup>2</sup> (44733)                                                                                                                          | 1                       | 50                                    | 95                       | 76                             | 2                                |
| <i>Togula jolla</i> <sup>2</sup> (42755)                                                                                                                              | 3                       | 66                                    | 100                      | 151                            | 4                                |
| <i>Favella ehrenbergii</i> <sup>3</sup> (14034)                                                                                                                       | 2                       | 1                                     | 13                       | 21                             | 0                                |
| <i>Strombidinopsis acuminatum</i> <sup>3</sup> (33155)                                                                                                                | 1                       | 9                                     | 67                       | 65                             | 1                                |
| <i>Eimeria tenella</i> * <sup>4</sup> (8597)                                                                                                                          | 1                       | 21                                    | 15                       | 41                             | 2                                |
| <i>Neospora caninum</i> * <sup>4</sup> (7122)                                                                                                                         | 2                       | 22                                    | 14                       | 56                             | 2                                |



|                                                                                                                                                                                                                                                   |                                   |                                                              |                                     |                                       |                                              |
|---------------------------------------------------------------------------------------------------------------------------------------------------------------------------------------------------------------------------------------------------|-----------------------------------|--------------------------------------------------------------|-------------------------------------|---------------------------------------|----------------------------------------------|
| <i>Toxoplasma gondii</i> * <sup>4</sup><br>(8460)                                                                                                                                                                                                 | 2                                 | 22                                                           | 14                                  | 53                                    | 2                                            |
| <i>Vitrella brassicaformis</i> <sup>5</sup><br>(23743)                                                                                                                                                                                            | 2                                 | 38                                                           | 40                                  | 40                                    | 2                                            |
| <i>Chromera velia</i> <sup>6</sup> (19244)                                                                                                                                                                                                        | 1                                 | 18                                                           | 29                                  | 43                                    | 1                                            |
| <b>Stramenopiles (diatoms<sup>7</sup>, Chrysophyceae<sup>8</sup>, Pelagophyceae<sup>9</sup>, Labyrinthulids<sup>10</sup>, Raphidophyceae<sup>11</sup>, Synurophyceae<sup>12</sup>, Dictyochophyceae<sup>13</sup>, Xanthophyceae<sup>14</sup>)</b> |                                   |                                                              |                                     |                                       |                                              |
| <i>Thalassiosira pseudonana</i> <sup>7</sup><br>(17050)                                                                                                                                                                                           | 1                                 | 23                                                           | 15                                  | 42                                    | 1                                            |
| <i>Chromulina nebulosa</i> <sup>8</sup><br>(3839)                                                                                                                                                                                                 | 1                                 | 3                                                            | 6                                   | 18                                    | 0                                            |
| <i>Aureococcus anophagefferens</i> * <sup>9</sup><br>(11501)                                                                                                                                                                                      | 1                                 | 40                                                           | 24                                  | 65                                    | 1                                            |
| <i>Schizochytrium aggregatum</i> <sup>10</sup> (13373)                                                                                                                                                                                            | 1                                 | 9                                                            | 16                                  | 33                                    | 1                                            |
| <i>Chattonella subsalsa</i> <sup>11</sup><br>(18256)                                                                                                                                                                                              | 3                                 | 19                                                           | 36                                  | 51                                    | 1                                            |
| <i>Heterosigma akashiwo</i> <sup>11</sup><br>(32905)                                                                                                                                                                                              | 2                                 | 12                                                           | 43                                  | 42                                    | 2                                            |
| <i>Dinobryon</i> sp. <sup>12</sup> (18284)                                                                                                                                                                                                        | 2                                 | 15                                                           | 19                                  | 65                                    | 1                                            |
| <i>Ochromonas</i> sp. <sup>12</sup> (16703)                                                                                                                                                                                                       | 2                                 | 14                                                           | 23                                  | 48                                    | 2                                            |
| <i>Pinguicoccus pyrenoidosus</i> <sup>13</sup> (10811)                                                                                                                                                                                            | 2                                 | 26                                                           | 14                                  | 45                                    | 0                                            |
| <i>Vaucheria litorea</i> <sup>14</sup> (8258)                                                                                                                                                                                                     | 1                                 | 6                                                            | 35                                  | 39                                    | 2                                            |
| <b>Rhizaria</b>                                                                                                                                                                                                                                   |                                   |                                                              |                                     |                                       |                                              |
| <i>Bigelowiella longifila</i><br>(15959)                                                                                                                                                                                                          | 1                                 | 1                                                            | 37                                  | 15                                    | 2                                            |
| <i>Lotharella oceanica</i><br>(17354)                                                                                                                                                                                                             | 2                                 | 5                                                            | 51                                  | 24                                    | 3                                            |
| <b>Haptophytes</b>                                                                                                                                                                                                                                |                                   |                                                              |                                     |                                       |                                              |
| <i>Guillardia theta</i> * (24840)                                                                                                                                                                                                                 | 4                                 | 46                                                           | 43                                  | 78                                    | 11                                           |
| <i>Emiliana huxleyi</i> *<br>(39125)                                                                                                                                                                                                              | 2                                 | 95                                                           | 53                                  | 142                                   | 1                                            |
| <i>Imantonia</i> sp. (14800)                                                                                                                                                                                                                      | 2                                 | 5                                                            | 32                                  | 44                                    | 0                                            |
| <i>Isochrysis galbana</i><br>(39744)                                                                                                                                                                                                              | 2                                 | 60                                                           | 44                                  | 158                                   | 2                                            |
| <b>Viridiplantae</b>                                                                                                                                                                                                                              |                                   |                                                              |                                     |                                       |                                              |
| <i>Chlamydomonas euryale</i><br>(19516)                                                                                                                                                                                                           | 2                                 | 25                                                           | 19                                  | 39                                    | 1                                            |
| <i>Dunaliella tertiolecta</i><br>(13636)                                                                                                                                                                                                          | 2                                 | 30                                                           | 14                                  | 62                                    | 1                                            |
| <i>Micromonas</i> sp. (8956)                                                                                                                                                                                                                      | 2                                 | 27                                                           | 19                                  | 82                                    | 1                                            |
| <b>Euglenids<sup>15</sup>, Choanoflagellata<sup>16</sup>, Rhodophyta<sup>17</sup></b>                                                                                                                                                             |                                   |                                                              |                                     |                                       |                                              |
| <i>Eutreptiella gymnastica</i> <sup>15</sup><br>(21956)                                                                                                                                                                                           | 1                                 | 14                                                           | 32                                  | 66                                    | 1                                            |
| <i>Acanthoeca-like</i> sp. <sup>16</sup><br>(21655)                                                                                                                                                                                               | 3                                 | 25                                                           | 20                                  | 50                                    | 1                                            |
| <i>Rhodorus marinus</i> <sup>17</sup><br>(9995)                                                                                                                                                                                                   | 4                                 | 26                                                           | 27                                  | 74                                    | 1                                            |
| <i>Porphyridium aerugineum</i> <sup>17</sup> (8890)                                                                                                                                                                                               | 3                                 | 22                                                           | 13                                  | 35                                    | 1                                            |
|                                                                                                                                                                                                                                                   | <b>Leucine zipper<br/>PF15924</b> | <b>Staphylococcal<br/>nuclease<br/>homologue<br/>PF00565</b> | <b>F-box<br/>domain<br/>PF00646</b> | <b>BTB/POZ<br/>domain<br/>PF00651</b> | <b>Integrase core<br/>domain<br/>PF00665</b> |
| <b>Alveolates (basal<sup>1</sup> and core<sup>2</sup> dinoflagellates, ciliates<sup>3</sup>, Apicomplexa<sup>4</sup>, <i>Vitrella</i><sup>5</sup>, <i>Chromera</i><sup>6</sup>)</b>                                                               |                                   |                                                              |                                     |                                       |                                              |
| <i>Amoebophrya ceratii</i> * <sup>1</sup><br>(20969)                                                                                                                                                                                              | 1                                 | 2                                                            | 3                                   | 7                                     | 20                                           |
| <i>Noctiluca scintillans</i> <sup>1</sup>                                                                                                                                                                                                         | 1                                 | 0                                                            | 2                                   | 52                                    | 0                                            |

|                                                                                                                                                                                                                                                       |   |   |   |     |     |
|-------------------------------------------------------------------------------------------------------------------------------------------------------------------------------------------------------------------------------------------------------|---|---|---|-----|-----|
| (40911)                                                                                                                                                                                                                                               |   |   |   |     |     |
| <i>Oxyrrhis marina</i> <sup>1</sup> (34417)                                                                                                                                                                                                           | 2 | 1 | 0 | 26  | 0   |
| <i>Perkinsus marinus</i> * <sup>1</sup><br>(23654)                                                                                                                                                                                                    | 0 | 0 | 0 | 12  | 175 |
| <i>Alexandrium catenella</i> <sup>2</sup><br>(1108345)                                                                                                                                                                                                | 2 | 2 | 1 | 117 | 0   |
| <i>Amphidinium carterae</i> <sup>2</sup><br>(36236)                                                                                                                                                                                                   | 1 | 1 | 0 | 50  | 1   |
| <i>Crypthecodinium cohnii</i> <sup>2</sup><br>(48368)                                                                                                                                                                                                 | 1 | 0 | 0 | 38  | 0   |
| <i>Gambierdiscus australes</i> <sup>2</sup><br>(83402)                                                                                                                                                                                                | 2 | 3 | 0 | 84  | 1   |
| <i>Gymnodinium catenatum</i> <sup>2</sup><br>(83508)                                                                                                                                                                                                  | 1 | 1 | 1 | 144 | 0   |
| <i>Heterocapsa triquetra</i> <sup>2</sup><br>(57789)                                                                                                                                                                                                  | 1 | 1 | 0 | 40  | 0   |
| <i>Karenia brevis</i> <sup>2</sup> (93029)                                                                                                                                                                                                            | 2 | 0 | 1 | 134 | 0   |
| <i>Karlodinium micrum</i> <sup>2</sup><br>(58585)                                                                                                                                                                                                     | 1 | 0 | 1 | 83  | 0   |
| <i>Kryptoperidinium<br/>foliaceum</i> <sup>2</sup> (162643)                                                                                                                                                                                           | 1 | 3 | 4 | 96  | 6   |
| <i>Lingulodinium polyerda</i> <sup>2</sup><br>(99361)                                                                                                                                                                                                 | 1 | 1 | 0 | 112 | 0   |
| <i>Polarella glacialis</i> <sup>2</sup><br>(59754)                                                                                                                                                                                                    | 2 | 2 | 2 | 54  | 11  |
| <i>Scrippsiella hangoei</i> <sup>2</sup><br>(75339)                                                                                                                                                                                                   | 1 | 2 | 1 | 146 | 0   |
| <i>Symbiodinium</i> sp. <sup>2</sup><br>(44733)                                                                                                                                                                                                       | 1 | 0 | 0 | 103 | 0   |
| <i>Togula jolla</i> <sup>2</sup> (42755)                                                                                                                                                                                                              | 2 | 3 | 0 | 63  | 0   |
| <i>Favella ehrenbergii</i> <sup>3</sup><br>(14034)                                                                                                                                                                                                    | 0 | 1 | 0 | 1   | 0   |
| <i>Strombidinopsis<br/>acuminatum</i> <sup>3</sup> (33155)                                                                                                                                                                                            | 1 | 4 | 7 | 12  | 2   |
| <i>Eimeria tenella</i> * <sup>4</sup> (8597)                                                                                                                                                                                                          | 0 | 3 | 0 | 6   | 0   |
| <i>Neospora caninum</i> * <sup>4</sup><br>(7122)                                                                                                                                                                                                      | 0 | 3 | 1 | 6   | 0   |
| <i>Toxoplasma gondii</i> * <sup>4</sup><br>(8460)                                                                                                                                                                                                     | 0 | 3 | 1 | 8   | 0   |
| <i>Vitrella brassicaformis</i> <sup>5</sup><br>(23743)                                                                                                                                                                                                | 1 | 2 | 4 | 30  | 3   |
| <i>Chromera velia</i> <sup>6</sup> (19244)                                                                                                                                                                                                            | 0 | 2 | 0 | 20  | 7   |
| <b>Stramenopiles (diatoms<sup>7</sup>, Chrysophyceae<sup>8</sup>, Pelagophyceae<sup>9</sup>, Labyrinthulids<sup>10</sup>, Raphidophyceae<sup>11</sup>,<br/>Synurophyceae<sup>12</sup>, Dictyochophyceae<sup>13</sup>, Xanthophyceae<sup>14</sup>)</b> |   |   |   |     |     |
| <i>Thalassiosira pseudonana</i> <sup>7</sup><br>(17050)                                                                                                                                                                                               | 0 | 3 | 4 | 22  | 0   |
| <i>Chromulina nebulosa</i> <sup>8</sup><br>(3839)                                                                                                                                                                                                     | 0 | 0 | 0 | 3   | 4   |
| <i>Aureococcus<br/>anophagefferens</i> * <sup>9</sup><br>(11501)                                                                                                                                                                                      | 0 | 2 | 5 | 5   | 2   |
| <i>Schizochytrium<br/>aggregatum</i> <sup>10</sup> (13373)                                                                                                                                                                                            | 1 | 1 | 1 | 10  | 0   |
| <i>Chattonella subsalsa</i> <sup>11</sup><br>(18256)                                                                                                                                                                                                  | 1 | 4 | 4 | 37  | 9   |
| <i>Heterosigma akashiwo</i> <sup>11</sup><br>(32905)                                                                                                                                                                                                  | 1 | 4 | 1 | 22  | 19  |
| <i>Dinobryon</i> sp. <sup>12</sup> (18284)                                                                                                                                                                                                            | 1 | 0 | 0 | 12  | 11  |
| <i>Ochromonas</i> sp. <sup>12</sup> (16703)                                                                                                                                                                                                           | 1 | 0 | 0 | 9   | 4   |
| <i>Pinguicoccus</i>                                                                                                                                                                                                                                   | 0 | 1 | 2 | 11  | 2   |

|                                                                                                                                                                       |                                                        |                                        |                                                   |                               |                               |
|-----------------------------------------------------------------------------------------------------------------------------------------------------------------------|--------------------------------------------------------|----------------------------------------|---------------------------------------------------|-------------------------------|-------------------------------|
| <i>pyrenoidosus</i> <sup>13</sup> (10811)                                                                                                                             |                                                        |                                        |                                                   |                               |                               |
| <i>Vaucheria litorea</i> <sup>14</sup> (8258)                                                                                                                         | 0                                                      | 5                                      | 2                                                 | 6                             | 1                             |
| <b>Rhizaria</b>                                                                                                                                                       |                                                        |                                        |                                                   |                               |                               |
| <i>Bigelowiella longifila</i><br>(15959)                                                                                                                              | 1                                                      | 3                                      | 2                                                 | 5                             | 0                             |
| <i>Lotharella oceanica</i><br>(17354)                                                                                                                                 | 1                                                      | 4                                      | 4                                                 | 6                             | 0                             |
| <b>Haptophytes</b>                                                                                                                                                    |                                                        |                                        |                                                   |                               |                               |
| <i>Guillardia theta</i> * (24840)                                                                                                                                     | 0                                                      | 2                                      | 5                                                 | 14                            | 2                             |
| <i>Emiliana huxleyi</i> *<br>(39125)                                                                                                                                  | 0                                                      | 6                                      | 25                                                | 183                           | 0                             |
| <i>Imantonia</i> sp. (14800)                                                                                                                                          | 1                                                      | 3                                      | 0                                                 | 9                             | 2                             |
| <i>Isochrysis galbana</i><br>(39744)                                                                                                                                  | 2                                                      | 5                                      | 20                                                | 23                            | 6                             |
| <b>Viridiplantae</b>                                                                                                                                                  |                                                        |                                        |                                                   |                               |                               |
| <i>Chlamydomonas euryale</i><br>(19516)                                                                                                                               | 1                                                      | 2                                      | 6                                                 | 8                             | 8                             |
| <i>Dunaliella tertiolecta</i><br>(13636)                                                                                                                              | 1                                                      | 2                                      | 7                                                 | 8                             | 5                             |
| <i>Micromonas</i> sp. (8956)                                                                                                                                          | 0                                                      | 1                                      | 0                                                 | 5                             | 0                             |
| <b>Euglenids<sup>15</sup>, Choanoflagellata<sup>16</sup>, Rhodophyta<sup>17</sup></b>                                                                                 |                                                        |                                        |                                                   |                               |                               |
| <i>Eutreptiella gymnastica</i> <sup>15</sup><br>(21956)                                                                                                               | 2                                                      | 2                                      | 4                                                 | 13                            | 2                             |
| <i>Acanthoeca</i> -like sp. <sup>16</sup><br>(21655)                                                                                                                  | 0                                                      | 1                                      | 3                                                 | 4                             | 4                             |
| <i>Rhodorus marinus</i> <sup>17</sup><br>(9995)                                                                                                                       | 0                                                      | 3                                      | 5                                                 | 7                             | 10                            |
| <i>Porphyridium aerugineum</i> <sup>17</sup> (8890)                                                                                                                   | 0                                                      | 4                                      | 4                                                 | 2                             | 4                             |
|                                                                                                                                                                       | <b>Nucleosome<br/>assembly<br/>protein<br/>PF00956</b> | <b>TF S-II<br/>(TFIIS)<br/>PF01096</b> | <b>D-1<br/>ubiquitin<br/>protease<br/>PF01398</b> | <b>IBR domain<br/>PF01485</b> | <b>GAF domain<br/>PF01590</b> |
| <b>Alveolates (basal<sup>1</sup> and core<sup>2</sup> dinoflagellates, ciliates<sup>3</sup>, Apicomplexa<sup>4</sup>, Vitrella<sup>5</sup>, Chromera<sup>6</sup>)</b> |                                                        |                                        |                                                   |                               |                               |
| <i>Amoebophrya ceratii</i> * <sup>1</sup><br>(20969)                                                                                                                  | 2                                                      | 2                                      | 8                                                 | 2                             | 10                            |
| <i>Noctiluca scintillans</i> <sup>1</sup><br>(40911)                                                                                                                  | 5                                                      | 3                                      | 9                                                 | 18                            | 11                            |
| <i>Oxyrrhis marina</i> <sup>1</sup> (34417)                                                                                                                           | 3                                                      | 0                                      | 5                                                 | 11                            | 23                            |
| <i>Perkinsus marinus</i> * <sup>1</sup><br>(23654)                                                                                                                    | 6                                                      | 9                                      | 10                                                | 5                             | 1                             |
| <i>Alexandrium catenella</i> <sup>2</sup><br>(1108345)                                                                                                                | 3                                                      | 7                                      | 9                                                 | 39                            | 17                            |
| <i>Amphidinium carterae</i> <sup>2</sup><br>(36236)                                                                                                                   | 4                                                      | 1                                      | 8                                                 | 17                            | 12                            |
| <i>Cryptocodinium cohnii</i> <sup>2</sup><br>(48368)                                                                                                                  | 4                                                      | 2                                      | 8                                                 | 15                            | 8                             |
| <i>Gambierdiscus australes</i> <sup>2</sup><br>(83402)                                                                                                                | 5                                                      | 6                                      | 12                                                | 45                            | 9                             |
| <i>Gymnodinium catenatum</i> <sup>2</sup><br>(83508)                                                                                                                  | 10                                                     | 4                                      | 14                                                | 30                            | 25                            |
| <i>Heterocapsa triquetra</i> <sup>2</sup><br>(57789)                                                                                                                  | 5                                                      | 2                                      | 7                                                 | 13                            | 7                             |
| <i>Karenia brevis</i> <sup>2</sup> (93029)                                                                                                                            | 9                                                      | 6                                      | 8                                                 | 34                            | 31                            |
| <i>Karlodinium micrum</i> <sup>2</sup><br>(58585)                                                                                                                     | 5                                                      | 3                                      | 8                                                 | 34                            | 18                            |
| <i>Kryptoperidinium foliaceum</i> <sup>2</sup> (162643)                                                                                                               | 15                                                     | 5                                      | 21                                                | 23                            | 19                            |
| <i>Lingulodinium polyerda</i> <sup>2</sup>                                                                                                                            | 5                                                      | 5                                      | 9                                                 | 21                            | 19                            |

|                                                                                                                                                                                                                                                   |   |   |    |    |    |
|---------------------------------------------------------------------------------------------------------------------------------------------------------------------------------------------------------------------------------------------------|---|---|----|----|----|
| (99361)                                                                                                                                                                                                                                           |   |   |    |    |    |
| <i>Polarella glacialis</i> <sup>2</sup><br>(59754)                                                                                                                                                                                                | 8 | 4 | 20 | 12 | 14 |
| <i>Scrippsiella hangoei</i> <sup>2</sup><br>(75339)                                                                                                                                                                                               | 8 | 4 | 9  | 31 | 8  |
| <i>Symbiodinium</i> sp. <sup>2</sup><br>(44733)                                                                                                                                                                                                   | 2 | 2 | 9  | 8  | 6  |
| <i>Togula jolla</i> <sup>2</sup> (42755)                                                                                                                                                                                                          | 4 | 2 | 9  | 13 | 11 |
| <i>Favella ehrenbergii</i> <sup>3</sup><br>(14034)                                                                                                                                                                                                | 2 | 0 | 5  | 6  | 2  |
| <i>Strombidinopsis</i><br><i>acuminatum</i> <sup>3</sup> (33155)                                                                                                                                                                                  | 9 | 3 | 20 | 5  | 0  |
| <i>Eimeria tenella</i> * <sup>4</sup> (8597)                                                                                                                                                                                                      | 2 | 3 | 3  | 1  | 0  |
| <i>Neospora caninum</i> * <sup>4</sup><br>(7122)                                                                                                                                                                                                  | 3 | 4 | 6  | 3  | 3  |
| <i>Toxoplasma gondii</i> * <sup>4</sup><br>(8460)                                                                                                                                                                                                 | 3 | 4 | 6  | 3  | 3  |
| <i>Vitrella brassicaformis</i> <sup>5</sup><br>(23743)                                                                                                                                                                                            | 2 | 1 | 8  | 10 | 7  |
| <i>Chromera velia</i> <sup>6</sup> (19244)                                                                                                                                                                                                        | 1 | 4 | 8  | 6  | 0  |
| <b>Stramenopiles (diatoms<sup>7</sup>, Chrysophyceae<sup>8</sup>, Pelagophyceae<sup>9</sup>, Labyrinthulids<sup>10</sup>, Raphidophyceae<sup>11</sup>, Synurophyceae<sup>12</sup>, Dictyochophyceae<sup>13</sup>, Xanthophyceae<sup>14</sup>)</b> |   |   |    |    |    |
| <i>Thalassiosira pseudonana</i> <sup>7</sup><br>(17050)                                                                                                                                                                                           | 1 | 2 | 5  | 6  | 3  |
| <i>Chromulina nebulosa</i> <sup>8</sup><br>(3839)                                                                                                                                                                                                 | 1 | 1 | 2  | 1  | 2  |
| <i>Aureococcus</i><br><i>anophagefferens</i> * <sup>9</sup><br>(11501)                                                                                                                                                                            | 1 | 4 | 10 | 7  | 1  |
| <i>Schizochytrium</i><br><i>aggregatum</i> <sup>10</sup> (13373)                                                                                                                                                                                  | 1 | 2 | 4  | 1  | 4  |
| <i>Chattonella subsalsa</i> <sup>11</sup><br>(18256)                                                                                                                                                                                              | 2 | 1 | 9  | 8  | 8  |
| <i>Heterosigma akashiwo</i> <sup>11</sup><br>(32905)                                                                                                                                                                                              | 2 | 2 | 9  | 8  | 13 |
| <i>Dinobryon</i> sp. <sup>12</sup> (18284)                                                                                                                                                                                                        | 2 | 0 | 7  | 12 | 4  |
| <i>Ochromonas</i> sp. <sup>12</sup> (16703)                                                                                                                                                                                                       | 1 | 2 | 5  | 7  | 5  |
| <i>Pinguicoccus</i><br><i>pyrenoidosus</i> <sup>13</sup> (10811)                                                                                                                                                                                  | 0 | 2 | 7  | 5  | 6  |
| <i>Vaucheria litorea</i> <sup>14</sup> (8258)                                                                                                                                                                                                     | 1 | 1 | 5  | 1  | 0  |
| <b>Rhizaria</b>                                                                                                                                                                                                                                   |   |   |    |    |    |
| <i>Bigelowiella longifila</i><br>(15959)                                                                                                                                                                                                          | 4 | 6 | 6  | 10 | 4  |
| <i>Lotharella oceanica</i><br>(17354)                                                                                                                                                                                                             | 2 | 3 | 9  | 8  | 2  |
| <b>Haptophytes</b>                                                                                                                                                                                                                                |   |   |    |    |    |
| <i>Guillardia theta</i> * (24840)                                                                                                                                                                                                                 | 2 | 4 | 9  | 17 | 11 |
| <i>Emiliana huxleyi</i> *<br>(39125)                                                                                                                                                                                                              | 4 | 6 | 10 | 19 | 3  |
| <i>Imantonia</i> sp. (14800)                                                                                                                                                                                                                      | 2 | 3 | 11 | 5  | 3  |
| <i>Isochrysis galbana</i><br>(39744)                                                                                                                                                                                                              | 7 | 9 | 16 | 9  | 3  |
| <b>Viridiplantae</b>                                                                                                                                                                                                                              |   |   |    |    |    |
| <i>Chlamydomonas euryale</i><br>(19516)                                                                                                                                                                                                           | 4 | 2 | 10 | 3  | 3  |
| <i>Dunaliella tertiolecta</i><br>(13636)                                                                                                                                                                                                          | 3 | 3 | 11 | 4  | 5  |
| <i>Micromonas</i> sp. (8956)                                                                                                                                                                                                                      | 1 | 2 | 8  | 2  | 2  |
| <b>Euglenids<sup>15</sup>, Choanoflagellata<sup>16</sup>, Rhodophyta<sup>17</sup></b>                                                                                                                                                             |   |   |    |    |    |

|                                                                                                                                                                                                                                                   |                                  |                               |                                 |                            |                                                      |
|---------------------------------------------------------------------------------------------------------------------------------------------------------------------------------------------------------------------------------------------------|----------------------------------|-------------------------------|---------------------------------|----------------------------|------------------------------------------------------|
| <i>Eutreptiella gymnastica</i> <sup>15</sup><br>(21956)                                                                                                                                                                                           | 4                                | 1                             | 9                               | 4                          | 11                                                   |
| <i>Acanthoecca</i> -like sp. <sup>16</sup><br>(21655)                                                                                                                                                                                             | 1                                | 3                             | 8                               | 9                          | 1                                                    |
| <i>Rhodorus marinus</i> <sup>17</sup><br>(9995)                                                                                                                                                                                                   | 1                                | 1                             | 7                               | 1                          | 0                                                    |
| <i>Porphyridium aerugineum</i> <sup>17</sup> (8890)                                                                                                                                                                                               | 1                                | 4                             | 6                               | 5                          | 0                                                    |
|                                                                                                                                                                                                                                                   | <b>BolA-like protein PF01722</b> | <b>IPT/TIG domain PF01833</b> | <b>DJ-1/PfpI family PF01965</b> | <b>Sir2 family PF02146</b> | <b>Transcriptional Coactivator p15 (PC4) PF02229</b> |
| <b>Alveolates (basal<sup>1</sup> and core<sup>2</sup> dinoflagellates, ciliates<sup>3</sup>, Apicomplexa<sup>4</sup>, <i>Vitrella</i><sup>5</sup>, <i>Chromera</i><sup>6</sup>)</b>                                                               |                                  |                               |                                 |                            |                                                      |
| <i>Amoebophrya ceratii</i> <sup>*1</sup><br>(20969)                                                                                                                                                                                               | 2                                | 3                             | 4                               | 5                          | 3                                                    |
| <i>Noctiluca scintillans</i> <sup>1</sup><br>(40911)                                                                                                                                                                                              | 7                                | 1                             | 7                               | 15                         | 1                                                    |
| <i>Oxyrrhis marina</i> <sup>1</sup> (34417)                                                                                                                                                                                                       | 3                                | 1                             | 3                               | 14                         | 2                                                    |
| <i>Perkinsus marinus</i> <sup>*1</sup><br>(23654)                                                                                                                                                                                                 | 5                                | 5                             | 2                               | 9                          | 2                                                    |
| <i>Alexandrium catenella</i> <sup>2</sup><br>(1108345)                                                                                                                                                                                            | 6                                | 7                             | 6                               | 46                         | 1                                                    |
| <i>Amphidinium carterae</i> <sup>2</sup><br>(36236)                                                                                                                                                                                               | 4                                | 7                             | 5                               | 12                         | 1                                                    |
| <i>Cryptocodinium cohnii</i> <sup>2</sup><br>(48368)                                                                                                                                                                                              | 7                                | 2                             | 1                               | 16                         | 1                                                    |
| <i>Gambierdiscus australes</i> <sup>2</sup><br>(83402)                                                                                                                                                                                            | 5                                | 5                             | 6                               | 43                         | 1                                                    |
| <i>Gymnodinium catenatum</i> <sup>2</sup><br>(83508)                                                                                                                                                                                              | 7                                | 2                             | 5                               | 35                         | 1                                                    |
| <i>Heterocapsa triquetra</i> <sup>2</sup><br>(57789)                                                                                                                                                                                              | 1                                | 2                             | 4                               | 12                         | 0                                                    |
| <i>Karenia brevis</i> <sup>2</sup> (93029)                                                                                                                                                                                                        | 7                                | 9                             | 5                               | 50                         | 2                                                    |
| <i>Karlodinium micrum</i> <sup>2</sup><br>(58585)                                                                                                                                                                                                 | 3                                | 2                             | 7                               | 30                         | 2                                                    |
| <i>Kryptoperidinium foliaceum</i> <sup>2</sup> (162643)                                                                                                                                                                                           | 9                                | 11                            | 27                              | 25                         | 3                                                    |
| <i>Lingulodinium polyerda</i> <sup>2</sup><br>(99361)                                                                                                                                                                                             | 2                                | 1                             | 9                               | 21                         | 1                                                    |
| <i>Polarella glacialis</i> <sup>2</sup><br>(59754)                                                                                                                                                                                                | 5                                | 6                             | 8                               | 23                         | 2                                                    |
| <i>Scrippsiella hangoei</i> <sup>2</sup><br>(75339)                                                                                                                                                                                               | 5                                | 0                             | 5                               | 25                         | 1                                                    |
| <i>Symbiodinium</i> sp. <sup>2</sup><br>(44733)                                                                                                                                                                                                   | 5                                | 6                             | 4                               | 16                         | 1                                                    |
| <i>Togula jolla</i> <sup>2</sup> (42755)                                                                                                                                                                                                          | 3                                | 1                             | 7                               | 15                         | 2                                                    |
| <i>Favella ehrenbergii</i> <sup>3</sup><br>(14034)                                                                                                                                                                                                | 3                                | 10                            | 0                               | 7                          | 0                                                    |
| <i>Strombidinopsis acuminatum</i> <sup>3</sup> (33155)                                                                                                                                                                                            | 3                                | 13                            | 5                               | 6                          | 0                                                    |
| <i>Eimeria tenella</i> <sup>*4</sup> (8597)                                                                                                                                                                                                       | 1                                | 1                             | 1                               | 1                          | 0                                                    |
| <i>Neospora caninum</i> <sup>*4</sup><br>(7122)                                                                                                                                                                                                   | 2                                | 0                             | 1                               | 2                          | 0                                                    |
| <i>Toxoplasma gondii</i> <sup>*4</sup><br>(8460)                                                                                                                                                                                                  | 2                                | 0                             | 1                               | 2                          | 0                                                    |
| <i>Vitrella brassicaformis</i> <sup>5</sup><br>(23743)                                                                                                                                                                                            | 3                                | 9                             | 1                               | 4                          | 1                                                    |
| <i>Chromera velia</i> <sup>6</sup> (19244)                                                                                                                                                                                                        | 3                                | 0                             | 1                               | 5                          | 1                                                    |
| <b>Stramenopiles (diatoms<sup>7</sup>, Chrysophyceae<sup>8</sup>, Pelagophyceae<sup>9</sup>, Labyrinthulids<sup>10</sup>, Raphidophyceae<sup>11</sup>, Synurophyceae<sup>12</sup>, Dictyochophyceae<sup>13</sup>, Xanthophyceae<sup>14</sup>)</b> |                                  |                               |                                 |                            |                                                      |

|                                                                                                                                                                       |                          |                                                                           |                                                         |                                                                               |                                                                                             |
|-----------------------------------------------------------------------------------------------------------------------------------------------------------------------|--------------------------|---------------------------------------------------------------------------|---------------------------------------------------------|-------------------------------------------------------------------------------|---------------------------------------------------------------------------------------------|
| <i>Thalassiosira pseudonana</i> <sup>7</sup><br>(17050)                                                                                                               | 3                        | 1                                                                         | 3                                                       | 7                                                                             | 1                                                                                           |
| <i>Chromulina nebulosa</i> <sup>8</sup><br>(3839)                                                                                                                     | 0                        | 1                                                                         | 0                                                       | 0                                                                             | 0                                                                                           |
| <i>Aureococcus anophagefferens</i> * <sup>9</sup><br>(11501)                                                                                                          | 2                        | 3                                                                         | 3                                                       | 3                                                                             | 0                                                                                           |
| <i>Schizochytrium aggregatum</i> <sup>10</sup> (13373)                                                                                                                | 2                        | 1                                                                         | 2                                                       | 5                                                                             | 1                                                                                           |
| <i>Chattonella subsalsa</i> <sup>11</sup><br>(18256)                                                                                                                  | 3                        | 8                                                                         | 5                                                       | 8                                                                             | 1                                                                                           |
| <i>Heterosigma akashiwo</i> <sup>11</sup><br>(32905)                                                                                                                  | 5                        | 0                                                                         | 7                                                       | 5                                                                             | 2                                                                                           |
| <i>Dinobryon</i> sp. <sup>12</sup> (18284)                                                                                                                            | 1                        | 12                                                                        | 1                                                       | 3                                                                             | 2                                                                                           |
| <i>Ochromonas</i> sp. <sup>12</sup> (16703)                                                                                                                           | 2                        | 1                                                                         | 1                                                       | 2                                                                             | 0                                                                                           |
| <i>Pinguicoccus pyrenoidosus</i> <sup>13</sup> (10811)                                                                                                                | 1                        | 1                                                                         | 0                                                       | 3                                                                             | 1                                                                                           |
| <i>Vaucheria litorea</i> <sup>14</sup> (8258)                                                                                                                         | 2                        | 1                                                                         | 3                                                       | 3                                                                             | 1                                                                                           |
| <b>Rhizaria</b>                                                                                                                                                       |                          |                                                                           |                                                         |                                                                               |                                                                                             |
| <i>Bigelowiella longifila</i><br>(15959)                                                                                                                              | 3                        | 0                                                                         | 2                                                       | 7                                                                             | 4                                                                                           |
| <i>Lotharella oceanica</i><br>(17354)                                                                                                                                 | 4                        | 0                                                                         | 6                                                       | 7                                                                             | 4                                                                                           |
| <b>Haptophytes</b>                                                                                                                                                    |                          |                                                                           |                                                         |                                                                               |                                                                                             |
| <i>Guillardia theta</i> * (24840)                                                                                                                                     | 5                        | 68                                                                        | 4                                                       | 6                                                                             | 2                                                                                           |
| <i>Emiliana huxleyi</i> *<br>(39125)                                                                                                                                  | 8                        | 5                                                                         | 12                                                      | 24                                                                            | 0                                                                                           |
| <i>Imantonia</i> sp. (14800)                                                                                                                                          | 3                        | 0                                                                         | 3                                                       | 11                                                                            | 1                                                                                           |
| <i>Isochrysis galbana</i><br>(39744)                                                                                                                                  | 6                        | 14                                                                        | 8                                                       | 17                                                                            | 0                                                                                           |
| <b>Viridiplantae</b>                                                                                                                                                  |                          |                                                                           |                                                         |                                                                               |                                                                                             |
| <i>Chlamydomonas euryale</i><br>(19516)                                                                                                                               | 6                        | 4                                                                         | 0                                                       | 2                                                                             | 1                                                                                           |
| <i>Dunaliella tertiolecta</i><br>(13636)                                                                                                                              | 2                        | 6                                                                         | 2                                                       | 2                                                                             | 1                                                                                           |
| <i>Micromonas</i> sp. (8956)                                                                                                                                          | 1                        | 12                                                                        | 2                                                       | 3                                                                             | 1                                                                                           |
| <b>Euglenids<sup>15</sup>, Choanoflagellata<sup>16</sup>, Rhodophyta<sup>17</sup></b>                                                                                 |                          |                                                                           |                                                         |                                                                               |                                                                                             |
| <i>Eutreptiella gymnastica</i> <sup>15</sup><br>(21956)                                                                                                               | 4                        | 6                                                                         | 3                                                       | 12                                                                            | 0                                                                                           |
| <i>Acanthoeca</i> -like sp. <sup>16</sup><br>(21655)                                                                                                                  | 4                        | 4                                                                         | 0                                                       | 7                                                                             | 0                                                                                           |
| <i>Rhodosorus marinus</i> <sup>17</sup><br>(9995)                                                                                                                     | 1                        | 1                                                                         | 2                                                       | 7                                                                             | 0                                                                                           |
| <i>Porphyridium aerugineum</i> <sup>17</sup> (8890)                                                                                                                   | 1                        | 2                                                                         | 2                                                       | 2                                                                             | 1                                                                                           |
|                                                                                                                                                                       | <b>Pirin<br/>PF02678</b> | <b>Phosphotyrosyl<br/>phosphate<br/>activator<br/>protein<br/>PF03095</b> | <b>CAS/CSE<br/>protein, C-<br/>terminus<br/>PF03378</b> | <b>LEM3 (ligand-<br/>effect<br/>modulator 3)<br/>CDC50 family<br/>PF03381</b> | <b>Early<br/>transcription<br/>elongation<br/>factor of RNA<br/>pol II, NGN<br/>PF03439</b> |
| <b>Alveolates (basal<sup>1</sup> and core<sup>2</sup> dinoflagellates, ciliates<sup>3</sup>, Apicomplexa<sup>4</sup>, Vitrella<sup>5</sup>, Chromera<sup>6</sup>)</b> |                          |                                                                           |                                                         |                                                                               |                                                                                             |
| <i>Amoebophrya ceratii</i> * <sup>1</sup><br>(20969)                                                                                                                  | 3                        | 1                                                                         | 2                                                       | 4                                                                             | 1                                                                                           |
| <i>Noctiluca scintillans</i> <sup>1</sup><br>(40911)                                                                                                                  | 3                        | 1                                                                         | 1                                                       | 3                                                                             | 1                                                                                           |
| <i>Oxyrrhis marina</i> <sup>1</sup> (34417)                                                                                                                           | 6                        | 0                                                                         | 1                                                       | 4                                                                             | 1                                                                                           |
| <i>Perkinsus marinus</i> * <sup>1</sup><br>(23654)                                                                                                                    | 0                        | 2                                                                         | 7                                                       | 7                                                                             | 1                                                                                           |

|                                                                                                                                                                                                                                                       |    |   |   |    |   |
|-------------------------------------------------------------------------------------------------------------------------------------------------------------------------------------------------------------------------------------------------------|----|---|---|----|---|
| <i>Alexandrium catenella</i> <sup>2</sup><br>(1108345)                                                                                                                                                                                                | 5  | 2 | 3 | 8  | 1 |
| <i>Amphidinium carterae</i> <sup>2</sup><br>(36236)                                                                                                                                                                                                   | 11 | 1 | 1 | 10 | 1 |
| <i>Cryptocodinium cohnii</i> <sup>2</sup><br>(48368)                                                                                                                                                                                                  | 3  | 1 | 2 | 6  | 1 |
| <i>Gambierdiscus australes</i> <sup>2</sup><br>(83402)                                                                                                                                                                                                | 10 | 1 | 2 | 6  | 1 |
| <i>Gymnodinium catenatum</i> <sup>2</sup><br>(83508)                                                                                                                                                                                                  | 4  | 1 | 2 | 6  | 1 |
| <i>Heterocapsa triquetra</i> <sup>2</sup><br>(57789)                                                                                                                                                                                                  | 2  | 1 | 1 | 9  | 1 |
| <i>Karenia brevis</i> <sup>2</sup> (93029)                                                                                                                                                                                                            | 6  | 2 | 2 | 12 | 1 |
| <i>Karlodinium micrum</i> <sup>2</sup><br>(58585)                                                                                                                                                                                                     | 4  | 1 | 1 | 7  | 1 |
| <i>Kryptoperidinium<br/>foliaceum</i> <sup>2</sup> (162643)                                                                                                                                                                                           | 3  | 3 | 5 | 16 | 2 |
| <i>Lingulodinium polyerda</i> <sup>2</sup><br>(99361)                                                                                                                                                                                                 | 4  | 1 | 3 | 7  | 1 |
| <i>Polarella glacialis</i> <sup>2</sup><br>(59754)                                                                                                                                                                                                    | 6  | 0 | 1 | 9  | 1 |
| <i>Scrippsiella hangoei</i> <sup>2</sup><br>(75339)                                                                                                                                                                                                   | 5  | 1 | 3 | 7  | 1 |
| <i>Symbiodinium sp.</i> <sup>2</sup><br>(44733)                                                                                                                                                                                                       | 7  | 1 | 1 | 7  | 1 |
| <i>Togula jolla</i> <sup>2</sup> (42755)                                                                                                                                                                                                              | 4  | 1 | 2 | 9  | 2 |
| <i>Favella ehrenbergii</i> <sup>3</sup><br>(14034)                                                                                                                                                                                                    | 1  | 1 | 0 | 1  | 0 |
| <i>Strombidinopsis<br/>acuminatum</i> <sup>3</sup> (33155)                                                                                                                                                                                            | 3  | 2 | 1 | 2  | 0 |
| <i>Eimeria tenella</i> <sup>*4</sup> (8597)                                                                                                                                                                                                           | 0  | 1 | 1 | 3  | 1 |
| <i>Neospora caninum</i> <sup>*4</sup><br>(7122)                                                                                                                                                                                                       | 0  | 1 | 1 | 4  | 1 |
| <i>Toxoplasma gondii</i> <sup>*4</sup><br>(8460)                                                                                                                                                                                                      | 0  | 1 | 1 | 4  | 1 |
| <i>Vitrella brassicaformis</i> <sup>5</sup><br>(23743)                                                                                                                                                                                                | 3  | 1 | 1 | 2  | 1 |
| <i>Chromera velia</i> <sup>6</sup> (19244)                                                                                                                                                                                                            | 2  | 1 | 1 | 3  | 1 |
| <b>Stramenopiles (diatoms<sup>7</sup>, Chrysophyceae<sup>8</sup>, Pelagophyceae<sup>9</sup>, Labyrinthulids<sup>10</sup>, Raphidophyceae<sup>11</sup>,<br/>Synurophyceae<sup>12</sup>, Dictyochophyceae<sup>13</sup>, Xanthophyceae<sup>14</sup>)</b> |    |   |   |    |   |
| <i>Thalassiosira pseudonana</i> <sup>7</sup><br>(17050)                                                                                                                                                                                               | 1  | 1 | 1 | 1  | 1 |
| <i>Chromulina nebulosa</i> <sup>8</sup><br>(3839)                                                                                                                                                                                                     | 2  | 0 | 1 | 0  | 1 |
| <i>Aureococcus<br/>anophagefferens</i> <sup>*9</sup><br>(11501)                                                                                                                                                                                       | 4  | 1 | 1 | 2  | 1 |
| <i>Schizochytrium<br/>aggregatum</i> <sup>10</sup> (13373)                                                                                                                                                                                            | 2  | 1 | 1 | 1  | 1 |
| <i>Chattonella subsalsa</i> <sup>11</sup><br>(18256)                                                                                                                                                                                                  | 3  | 2 | 1 | 2  | 1 |
| <i>Heterosigma akashiwo</i> <sup>11</sup><br>(32905)                                                                                                                                                                                                  | 1  | 1 | 2 | 2  | 0 |
| <i>Dinobryon sp.</i> <sup>12</sup> (18284)                                                                                                                                                                                                            | 2  | 1 | 1 | 3  | 1 |
| <i>Ochromonas sp.</i> <sup>12</sup> (16703)                                                                                                                                                                                                           | 5  | 0 | 1 | 4  | 1 |
| <i>Pinguicoccus<br/>pyrenoidosus</i> <sup>13</sup> (10811)                                                                                                                                                                                            | 4  | 1 | 1 | 1  | 1 |
| <i>Vaucheria litorea</i> <sup>14</sup> (8258)                                                                                                                                                                                                         | 2  | 1 | 1 | 3  | 1 |
| <b>Rhizaria</b>                                                                                                                                                                                                                                       |    |   |   |    |   |
| <i>Bigelowiella longifila</i>                                                                                                                                                                                                                         | 4  | 1 | 2 | 4  | 0 |



|                                                                                                                                                                       |   |   |   |   |   |
|-----------------------------------------------------------------------------------------------------------------------------------------------------------------------|---|---|---|---|---|
| (15959)<br><i>Lotharella oceanica</i><br>(17354)                                                                                                                      | 4 | 1 | 1 | 5 | 0 |
| <b>Haptophytes</b>                                                                                                                                                    |   |   |   |   |   |
| <i>Guillardia theta</i> * (24840)                                                                                                                                     | 3 | 1 | 1 | 2 | 1 |
| <i>Emiliana huxleyi</i> *<br>(39125)                                                                                                                                  | 2 | 2 | 1 | 2 | 2 |
| <i>Imantonia</i> sp. (14800)                                                                                                                                          | 2 | 1 | 0 | 2 | 1 |
| <i>Isochrysis galbana</i><br>(39744)                                                                                                                                  | 6 | 2 | 2 | 2 | 3 |
| <b>Viridiplantae</b>                                                                                                                                                  |   |   |   |   |   |
| <i>Chlamydomonas euryale</i><br>(19516)                                                                                                                               | 2 | 1 | 1 | 2 | 1 |
| <i>Dunaliella tertiolecta</i><br>(13636)                                                                                                                              | 1 | 0 | 1 | 1 | 1 |
| <i>Micromonas</i> sp. (8956)                                                                                                                                          | 2 | 0 | 2 | 1 | 1 |
| <b>Euglenids<sup>15</sup>, Choanoflagellata<sup>16</sup>, Rhodophyta<sup>17</sup></b>                                                                                 |   |   |   |   |   |
| <i>Eutreptiella gymnastica</i> <sup>15</sup><br>(21956)                                                                                                               | 2 | 0 | 1 | 0 | 1 |
| <i>Acanthoeca</i> -like sp. <sup>16</sup><br>(21655)                                                                                                                  | 3 | 1 | 1 | 2 | 1 |
| <i>Rhodorus marinus</i> <sup>17</sup><br>(9995)                                                                                                                       | 2 | 1 | 2 | 2 | 1 |
| <i>Porphyridium aerugineum</i> <sup>17</sup> (8890)                                                                                                                   | 1 | 1 | 1 | 1 | 1 |
| <b>Structure-specific recognition protein (SSRP1) PF03531</b>                                                                                                         |   |   |   |   |   |
| <b>Alveolates (basal<sup>1</sup> and core<sup>2</sup> dinoflagellates, ciliates<sup>3</sup>, Apicomplexa<sup>4</sup>, Vitrella<sup>5</sup>, Chromera<sup>6</sup>)</b> |   |   |   |   |   |
| <i>Amoebophrya ceratii</i> * <sup>1</sup><br>(20969)                                                                                                                  | 1 | 1 | 1 | 1 | 1 |
| <i>Noctiluca scintillans</i> <sup>1</sup><br>(40911)                                                                                                                  | 1 | 0 | 1 | 3 | 1 |
| <i>Oxyrrhis marina</i> <sup>1</sup> (34417)                                                                                                                           | 1 | 0 | 1 | 2 | 1 |
| <i>Perkinsus marinus</i> * <sup>1</sup><br>(23654)                                                                                                                    | 2 | 1 | 2 | 2 | 2 |
| <i>Alexandrium catenella</i> <sup>2</sup><br>(1108345)                                                                                                                | 1 | 1 | 1 | 2 | 1 |
| <i>Amphidinium carterae</i> <sup>2</sup><br>(36236)                                                                                                                   | 1 | 1 | 1 | 3 | 1 |
| <i>Cryptothecodinium cohnii</i> <sup>2</sup><br>(48368)                                                                                                               | 1 | 1 | 1 | 3 | 1 |
| <i>Gambierdiscus australes</i> <sup>2</sup><br>(83402)                                                                                                                | 2 | 1 | 1 | 5 | 2 |
| <i>Gymnodinium catenatum</i> <sup>2</sup><br>(83508)                                                                                                                  | 1 | 1 | 2 | 4 | 1 |
| <i>Heterocapsa triquetra</i> <sup>2</sup><br>(57789)                                                                                                                  | 1 | 0 | 0 | 1 | 1 |
| <i>Karenia brevis</i> <sup>2</sup> (93029)                                                                                                                            | 2 | 2 | 1 | 3 | 1 |
| <i>Karlodinium micrum</i> <sup>2</sup><br>(58585)                                                                                                                     | 1 | 0 | 1 | 2 | 1 |
| <i>Kryptoperidinium foliaceum</i> <sup>2</sup> (162643)                                                                                                               | 3 | 3 | 1 | 1 | 3 |
| <i>Lingulodinium polyerda</i> <sup>2</sup><br>(99361)                                                                                                                 | 1 | 1 | 3 | 2 | 1 |
| <i>Polarella glacialis</i> <sup>2</sup><br>(59754)                                                                                                                    | 3 | 0 | 0 | 1 | 1 |

|                                                                                                                                                                                                                                                   |   |   |   |    |   |
|---------------------------------------------------------------------------------------------------------------------------------------------------------------------------------------------------------------------------------------------------|---|---|---|----|---|
| <i>Scrippsiella hangoei</i> <sup>2</sup><br>(75339)                                                                                                                                                                                               | 1 | 1 | 1 | 2  | 1 |
| <i>Symbiodinium</i> sp. <sup>2</sup><br>(44733)                                                                                                                                                                                                   | 1 | 1 | 1 | 1  | 1 |
| <i>Togula jolla</i> <sup>2</sup> (42755)                                                                                                                                                                                                          | 1 | 1 | 0 | 1  | 1 |
| <i>Favella ehrenbergii</i> <sup>3</sup><br>(14034)                                                                                                                                                                                                | 1 | 0 | 0 | 3  | 0 |
| <i>Strombidinopsis acuminatum</i> <sup>3</sup> (33155)                                                                                                                                                                                            | 1 | 0 | 0 | 4  | 1 |
| <i>Eimeria tenella</i> * <sup>4</sup> (8597)                                                                                                                                                                                                      | 1 | 0 | 1 | 0  | 1 |
| <i>Neospora caninum</i> * <sup>4</sup><br>(7122)                                                                                                                                                                                                  | 1 | 1 | 1 | 3  | 1 |
| <i>Toxoplasma gondii</i> * <sup>4</sup><br>(8460)                                                                                                                                                                                                 | 1 | 1 | 1 | 2  | 1 |
| <i>Vitrella brassicaformis</i> <sup>5</sup><br>(23743)                                                                                                                                                                                            | 1 | 2 | 1 | 4  | 1 |
| <i>Chromera velia</i> <sup>6</sup> (19244)                                                                                                                                                                                                        | 1 | 1 | 0 | 3  | 1 |
| <b>Stramenopiles (diatoms<sup>7</sup>, Chrysophyceae<sup>8</sup>, Pelagophyceae<sup>9</sup>, Labyrinthulids<sup>10</sup>, Raphidophyceae<sup>11</sup>, Synurophyceae<sup>12</sup>, Dictyochophyceae<sup>13</sup>, Xanthophyceae<sup>14</sup>)</b> |   |   |   |    |   |
| <i>Thalassiosira pseudonana</i> <sup>7</sup><br>(17050)                                                                                                                                                                                           | 2 | 0 | 1 | 1  | 1 |
| <i>Chromulina nebulosa</i> <sup>8</sup><br>(3839)                                                                                                                                                                                                 | 1 | 0 | 0 | 0  | 0 |
| <i>Aureococcus anophagefferens</i> * <sup>9</sup><br>(11501)                                                                                                                                                                                      | 1 | 1 | 0 | 0  | 0 |
| <i>Schizochytrium aggregatum</i> <sup>10</sup> (13373)                                                                                                                                                                                            | 2 | 1 | 1 | 3  | 1 |
| <i>Chattonella subsalsa</i> <sup>11</sup><br>(18256)                                                                                                                                                                                              | 1 | 1 | 0 | 3  | 1 |
| <i>Heterosigma akashiwo</i> <sup>11</sup><br>(32905)                                                                                                                                                                                              | 0 | 1 | 1 | 2  | 1 |
| <i>Dinobryon</i> sp. <sup>12</sup> (18284)                                                                                                                                                                                                        | 1 | 1 | 0 | 2  | 1 |
| <i>Ochromonas</i> sp. <sup>12</sup> (16703)                                                                                                                                                                                                       | 2 | 2 | 1 | 2  | 1 |
| <i>Pinguicoccus pyrenoidosus</i> <sup>13</sup> (10811)                                                                                                                                                                                            | 2 | 1 | 0 | 0  | 1 |
| <i>Vaucheria litorea</i> <sup>14</sup> (8258)                                                                                                                                                                                                     | 1 | 0 | 1 | 3  | 1 |
| <b>Rhizaria</b>                                                                                                                                                                                                                                   |   |   |   |    |   |
| <i>Bigelowiella longifila</i><br>(15959)                                                                                                                                                                                                          | 1 | 1 | 1 | 3  | 0 |
| <i>Lotharella oceanica</i><br>(17354)                                                                                                                                                                                                             | 1 | 0 | 1 | 4  | 0 |
| <b>Haptophytes</b>                                                                                                                                                                                                                                |   |   |   |    |   |
| <i>Guillardia theta</i> * (24840)                                                                                                                                                                                                                 | 1 | 1 | 1 | 4  | 1 |
| <i>Emiliana huxleyi</i> *<br>(39125)                                                                                                                                                                                                              | 4 | 1 | 1 | 9  | 2 |
| <i>Imantonia</i> sp. (14800)                                                                                                                                                                                                                      | 2 | 1 | 0 | 7  | 1 |
| <i>Isochrysis galbana</i><br>(39744)                                                                                                                                                                                                              | 3 | 3 | 2 | 11 | 2 |
| <b>Viridiplantae</b>                                                                                                                                                                                                                              |   |   |   |    |   |
| <i>Chlamydomonas euryale</i><br>(19516)                                                                                                                                                                                                           | 1 | 1 | 0 | 4  | 1 |
| <i>Dunaliella tertiolecta</i><br>(13636)                                                                                                                                                                                                          | 2 | 1 | 0 | 3  | 1 |
| <i>Micromonas</i> sp. (8956)                                                                                                                                                                                                                      | 1 | 0 | 0 | 3  | 1 |
| <b>Euglenids<sup>15</sup>, Choanoflagellata<sup>16</sup>, Rhodophyta<sup>17</sup></b>                                                                                                                                                             |   |   |   |    |   |
| <i>Eutreptiella gymnastica</i> <sup>15</sup><br>(21956)                                                                                                                                                                                           | 1 | 1 | 0 | 3  | 1 |
| <i>Acanthoeca</i> -like sp. <sup>16</sup>                                                                                                                                                                                                         | 1 | 1 | 1 | 2  | 1 |

|                                                                                                                                                                                                                                                       |                                                                 |                                                                    |                                                          |                                       |                                                            |
|-------------------------------------------------------------------------------------------------------------------------------------------------------------------------------------------------------------------------------------------------------|-----------------------------------------------------------------|--------------------------------------------------------------------|----------------------------------------------------------|---------------------------------------|------------------------------------------------------------|
| (21655)<br><i>Rhodosorus marinus</i> <sup>17</sup><br>(9995)                                                                                                                                                                                          | 2                                                               | 2                                                                  | 1                                                        | 3                                     | 2                                                          |
| <i>Porphyridium<br/>aerugineum</i> <sup>17</sup> (8890)                                                                                                                                                                                               | 1                                                               | 1                                                                  | 1                                                        | 3                                     | 1                                                          |
|                                                                                                                                                                                                                                                       | <b>CCR4-Not<br/>complex<br/>component,<br/>Not1<br/>PF04054</b> | <b>Cell<br/>differentiation<br/>family, Rcd1-<br/>like PF04078</b> | <b>NOT2 /<br/>NOT3 /<br/>NOT5<br/>family<br/>PF04153</b> | <b>EAP30/Vps36<br/>family PF04157</b> | <b>Transcriptional<br/>repressor<br/>TCF25<br/>PF04910</b> |
| <b>Alveolates (basal<sup>1</sup> and core<sup>2</sup> dinoflagellates, ciliates<sup>3</sup>, Apicomplexa<sup>4</sup>, <i>Vitrella</i><sup>5</sup>, <i>Chromera</i><sup>6</sup>)</b>                                                                   |                                                                 |                                                                    |                                                          |                                       |                                                            |
| <i>Amoebophrya ceratii</i> <sup>*1</sup><br>(20969)                                                                                                                                                                                                   | 1                                                               | 1                                                                  | 2                                                        | 1                                     | 1                                                          |
| <i>Noctiluca scintillans</i> <sup>1</sup><br>(40911)                                                                                                                                                                                                  | 1                                                               | 1                                                                  | 2                                                        | 2                                     | 2                                                          |
| <i>Oxyrrhis marina</i> <sup>1</sup> (34417)                                                                                                                                                                                                           | 1                                                               | 1                                                                  | 2                                                        | 2                                     | 1                                                          |
| <i>Perkinsus marinus</i> <sup>*1</sup><br>(23654)                                                                                                                                                                                                     | 2                                                               | 3                                                                  | 5                                                        | 4                                     | 2                                                          |
| <i>Alexandrium catenella</i> <sup>2</sup><br>(1108345)                                                                                                                                                                                                | 1                                                               | 1                                                                  | 2                                                        | 2                                     | 2                                                          |
| <i>Amphidinium carterae</i> <sup>2</sup><br>(36236)                                                                                                                                                                                                   | 1                                                               | 3                                                                  | 2                                                        | 2                                     | 1                                                          |
| <i>Cryptocodinium cohnii</i> <sup>2</sup><br>(48368)                                                                                                                                                                                                  | 1                                                               | 1                                                                  | 2                                                        | 1                                     | 2                                                          |
| <i>Gambierdiscus australes</i> <sup>2</sup><br>(83402)                                                                                                                                                                                                | 3                                                               | 2                                                                  | 3                                                        | 2                                     | 1                                                          |
| <i>Gymnodinium catenatum</i> <sup>2</sup><br>(83508)                                                                                                                                                                                                  | 5                                                               | 1                                                                  | 3                                                        | 2                                     | 3                                                          |
| <i>Heterocapsa triquetra</i> <sup>2</sup><br>(57789)                                                                                                                                                                                                  | 0                                                               | 1                                                                  | 2                                                        | 0                                     | 0                                                          |
| <i>Karenia brevis</i> <sup>2</sup> (93029)                                                                                                                                                                                                            | 2                                                               | 1                                                                  | 2                                                        | 2                                     | 1                                                          |
| <i>Karlodinium micrum</i> <sup>2</sup><br>(58585)                                                                                                                                                                                                     | 1                                                               | 1                                                                  | 2                                                        | 1                                     | 1                                                          |
| <i>Kryptoperidinium<br/>foliaceum</i> <sup>2</sup> (162643)                                                                                                                                                                                           | 4                                                               | 4                                                                  | 5                                                        | 2                                     | 4                                                          |
| <i>Lingulodinium polyerda</i> <sup>2</sup><br>(99361)                                                                                                                                                                                                 | 1                                                               | 0                                                                  | 2                                                        | 4                                     | 1                                                          |
| <i>Polarella glacialis</i> <sup>2</sup><br>(59754)                                                                                                                                                                                                    | 0                                                               | 1                                                                  | 2                                                        | 2                                     | 1                                                          |
| <i>Scrippsiella hangoei</i> <sup>2</sup><br>(75339)                                                                                                                                                                                                   | 1                                                               | 2                                                                  | 3                                                        | 0                                     | 2                                                          |
| <i>Symbiodinium</i> sp. <sup>2</sup><br>(44733)                                                                                                                                                                                                       | 1                                                               | 2                                                                  | 2                                                        | 2                                     | 0                                                          |
| <i>Togula jolla</i> <sup>2</sup> (42755)                                                                                                                                                                                                              | 1                                                               | 1                                                                  | 3                                                        | 0                                     | 1                                                          |
| <i>Favella ehrenbergii</i> <sup>3</sup><br>(14034)                                                                                                                                                                                                    | 1                                                               | 1                                                                  | 3                                                        | 2                                     | 0                                                          |
| <i>Strombidinopsis<br/>acuminatum</i> <sup>3</sup> (33155)                                                                                                                                                                                            | 1                                                               | 1                                                                  | 3                                                        | 0                                     | 0                                                          |
| <i>Eimeria tenella</i> <sup>*4</sup> (8597)                                                                                                                                                                                                           | 1                                                               | 1                                                                  | 2                                                        | 0                                     | 1                                                          |
| <i>Neospora caninum</i> <sup>*4</sup><br>(7122)                                                                                                                                                                                                       | 1                                                               | 1                                                                  | 2                                                        | 0                                     | 1                                                          |
| <i>Toxoplasma gondii</i> <sup>*4</sup><br>(8460)                                                                                                                                                                                                      | 1                                                               | 1                                                                  | 2                                                        | 0                                     | 1                                                          |
| <i>Vitrella brassicaformis</i> <sup>5</sup><br>(23743)                                                                                                                                                                                                | 2                                                               | 0                                                                  | 3                                                        | 1                                     | 1                                                          |
| <i>Chromera velia</i> <sup>6</sup> (19244)                                                                                                                                                                                                            | 1                                                               | 1                                                                  | 2                                                        | 1                                     | 2                                                          |
| <b>Stramenopiles (diatoms<sup>7</sup>, Chrysophyceae<sup>8</sup>, Pelagophyceae<sup>9</sup>, Labyrinthulids<sup>10</sup>, Raphidophyceae<sup>11</sup>,<br/>Synurophyceae<sup>12</sup>, Dictyochophyceae<sup>13</sup>, Xanthophyceae<sup>14</sup>)</b> |                                                                 |                                                                    |                                                          |                                       |                                                            |
| <i>Thalassiosira pseudonana</i> <sup>7</sup><br>(17050)                                                                                                                                                                                               | 1                                                               | 1                                                                  | 2                                                        | 1                                     | 1                                                          |

|                                                                                                                                                                       |                                          |                                        |                                           |                                 |                     |
|-----------------------------------------------------------------------------------------------------------------------------------------------------------------------|------------------------------------------|----------------------------------------|-------------------------------------------|---------------------------------|---------------------|
| <i>Chromulina nebulosa</i> <sup>8</sup><br>(3839)                                                                                                                     | 0                                        | 0                                      | 2                                         | 0                               | 0                   |
| <i>Aureococcus anophagefferens</i> * <sup>9</sup><br>(11501)                                                                                                          | 0                                        | 1                                      | 2                                         | 2                               | 1                   |
| <i>Schizochytrium aggregatum</i> <sup>10</sup> (13373)                                                                                                                | 1                                        | 1                                      | 2                                         | 2                               | 1                   |
| <i>Chattonella subsalsa</i> <sup>11</sup><br>(18256)                                                                                                                  | 1                                        | 1                                      | 2                                         | 2                               | 1                   |
| <i>Heterosigma akashiwo</i> <sup>11</sup><br>(32905)                                                                                                                  | 2                                        | 1                                      | 1                                         | 2                               | 0                   |
| <i>Dinobryon</i> sp. <sup>12</sup> (18284)                                                                                                                            | 1                                        | 1                                      | 2                                         | 2                               | 1                   |
| <i>Ochromonas</i> sp. <sup>12</sup> (16703)                                                                                                                           | 1                                        | 1                                      | 2                                         | 2                               | 2                   |
| <i>Pinguicoccus pyrenoidosus</i> <sup>13</sup> (10811)                                                                                                                | 1                                        | 1                                      | 3                                         | 1                               | 1                   |
| <i>Vaucheria litorea</i> <sup>14</sup> (8258)                                                                                                                         | 1                                        | 0                                      | 2                                         | 2                               | 1                   |
| <b>Rhizaria</b>                                                                                                                                                       |                                          |                                        |                                           |                                 |                     |
| <i>Bigelowiella longifila</i><br>(15959)                                                                                                                              | 1                                        | 1                                      | 3                                         | 2                               | 1                   |
| <i>Lotharella oceanica</i><br>(17354)                                                                                                                                 | 1                                        | 1                                      | 2                                         | 2                               | 0                   |
| <b>Haptophytes</b>                                                                                                                                                    |                                          |                                        |                                           |                                 |                     |
| <i>Guillardia theta</i> * (24840)                                                                                                                                     | 1                                        | 1                                      | 1                                         | 1                               | 0                   |
| <i>Emiliana huxleyi</i> *<br>(39125)                                                                                                                                  | 2                                        | 2                                      | 2                                         | 0                               | 2                   |
| <i>Imantonia</i> sp. (14800)                                                                                                                                          | 1                                        | 0                                      | 4                                         | 0                               | 1                   |
| <i>Isochrysis galbana</i><br>(39744)                                                                                                                                  | 2                                        | 2                                      | 4                                         | 0                               | 2                   |
| <b>Viridiplantae</b>                                                                                                                                                  |                                          |                                        |                                           |                                 |                     |
| <i>Chlamydomonas euryale</i><br>(19516)                                                                                                                               | 2                                        | 1                                      | 2                                         | 1                               | 1                   |
| <i>Dunaliella tertiolecta</i><br>(13636)                                                                                                                              | 1                                        | 1                                      | 2                                         | 2                               | 1                   |
| <i>Micromonas</i> sp. (8956)                                                                                                                                          | 1                                        | 1                                      | 2                                         | 2                               | 1                   |
| <b>Euglenids<sup>15</sup>, Choanoflagellata<sup>16</sup>, Rhodophyta<sup>17</sup></b>                                                                                 |                                          |                                        |                                           |                                 |                     |
| <i>Eutreptiella gymnastica</i> <sup>15</sup><br>(21956)                                                                                                               | 1                                        | 3                                      | 2                                         | 0                               | 0                   |
| <i>Acanthoeca</i> -like sp. <sup>16</sup><br>(21655)                                                                                                                  | 1                                        | 1                                      | 2                                         | 2                               | 1                   |
| <i>Rhodorus marinus</i> <sup>17</sup><br>(9995)                                                                                                                       | 1                                        | 0                                      | 5                                         | 2                               | 2                   |
| <i>Porphyridium aerugineum</i> <sup>17</sup> (8890)                                                                                                                   | 1                                        | 1                                      | 1                                         | 1                               | 1                   |
|                                                                                                                                                                       | <b>unknown function (DUF667) PF05018</b> | <b>TF elongation Elf1 like PF05129</b> | <b>RNA polI specific TIF RRN3 PF05327</b> | <b>NmrA-like family PF05368</b> | <b>SOH1 PF05669</b> |
| <b>Alveolates (basal<sup>1</sup> and core<sup>2</sup> dinoflagellates, ciliates<sup>3</sup>, Apicomplexa<sup>4</sup>, Vitrella<sup>5</sup>, Chromera<sup>6</sup>)</b> |                                          |                                        |                                           |                                 |                     |
| <i>Amoebophrya ceratii</i> * <sup>1</sup><br>(20969)                                                                                                                  | 3                                        | 1                                      | 1                                         | 1                               | 1                   |
| <i>Noctiluca scintillans</i> <sup>1</sup><br>(40911)                                                                                                                  | 2                                        | 1                                      | 1                                         | 2                               | 1                   |
| <i>Oxyrrhis marina</i> <sup>1</sup> (34417)                                                                                                                           | 2                                        | 2                                      | 1                                         | 10                              | 0                   |
| <i>Perkinsus marinus</i> * <sup>1</sup><br>(23654)                                                                                                                    | 4                                        | 1                                      | 1                                         | 1                               | 2                   |
| <i>Alexandrium catenella</i> <sup>2</sup><br>(1108345)                                                                                                                | 3                                        | 1                                      | 1                                         | 6                               | 1                   |
| <i>Amphidinium carterae</i> <sup>2</sup><br>(36236)                                                                                                                   | 2                                        | 1                                      | 1                                         | 2                               | 0                   |

|                                                                                                                                                                                                                                                       |    |   |   |    |   |
|-------------------------------------------------------------------------------------------------------------------------------------------------------------------------------------------------------------------------------------------------------|----|---|---|----|---|
| <i>Cryptocodinium cohnii</i> <sup>2</sup><br>(48368)                                                                                                                                                                                                  | 4  | 1 | 1 | 0  | 0 |
| <i>Gambierdiscus australes</i> <sup>2</sup><br>(83402)                                                                                                                                                                                                | 4  | 1 | 2 | 6  | 1 |
| <i>Gymnodinium catenatum</i> <sup>2</sup><br>(83508)                                                                                                                                                                                                  | 7  | 1 | 1 | 8  | 1 |
| <i>Heterocapsa triquetra</i> <sup>2</sup><br>(57789)                                                                                                                                                                                                  | 5  | 0 | 1 | 2  | 0 |
| <i>Karenia brevis</i> <sup>2</sup> (93029)                                                                                                                                                                                                            | 5  | 0 | 0 | 3  | 1 |
| <i>Karlodinium micrum</i> <sup>2</sup><br>(58585)                                                                                                                                                                                                     | 5  | 0 | 0 | 0  | 0 |
| <i>Kryptoperidinium<br/>foliaceum</i> <sup>2</sup> (162643)                                                                                                                                                                                           | 5  | 2 | 3 | 11 | 1 |
| <i>Lingulodinium polyerda</i> <sup>2</sup><br>(99361)                                                                                                                                                                                                 | 2  | 1 | 1 | 2  | 0 |
| <i>Polarella glacialis</i> <sup>2</sup><br>(59754)                                                                                                                                                                                                    | 11 | 1 | 1 | 3  | 0 |
| <i>Scrippsiella hangoei</i> <sup>2</sup><br>(75339)                                                                                                                                                                                                   | 6  | 1 | 1 | 1  | 1 |
| <i>Symbiodinium sp.</i> <sup>2</sup><br>(44733)                                                                                                                                                                                                       | 3  | 0 | 1 | 4  | 0 |
| <i>Togula jolla</i> <sup>2</sup> (42755)                                                                                                                                                                                                              | 2  | 1 | 2 | 2  | 1 |
| <i>Favella ehrenbergii</i> <sup>3</sup><br>(14034)                                                                                                                                                                                                    | 1  | 1 | 0 | 0  | 0 |
| <i>Strombidinopsis<br/>acuminatum</i> <sup>3</sup> (33155)                                                                                                                                                                                            | 5  | 2 | 0 | 3  | 1 |
| <i>Eimeria tenella</i> * <sup>4</sup> (8597)                                                                                                                                                                                                          | 2  | 0 | 1 | 0  | 1 |
| <i>Neospora caninum</i> * <sup>4</sup><br>(7122)                                                                                                                                                                                                      | 2  | 1 | 1 | 0  | 1 |
| <i>Toxoplasma gondii</i> * <sup>4</sup><br>(8460)                                                                                                                                                                                                     | 2  | 1 | 1 | 0  | 1 |
| <i>Vitrella brassicaformis</i> <sup>5</sup><br>(23743)                                                                                                                                                                                                | 0  | 1 | 1 | 6  | 0 |
| <i>Chromera velia</i> <sup>6</sup> (19244)                                                                                                                                                                                                            | 1  | 0 | 0 | 2  | 1 |
| <b>Stramenopiles (diatoms<sup>7</sup>, Chrysophyceae<sup>8</sup>, Pelagophyceae<sup>9</sup>, Labyrinthulids<sup>10</sup>, Raphidophyceae<sup>11</sup>,<br/>Synurophyceae<sup>12</sup>, Dictyochophyceae<sup>13</sup>, Xanthophyceae<sup>14</sup>)</b> |    |   |   |    |   |
| <i>Thalassiosira pseudonana</i> <sup>7</sup><br>(17050)                                                                                                                                                                                               | 1  | 1 | 1 | 2  | 1 |
| <i>Chromulina nebulosa</i> <sup>8</sup><br>(3839)                                                                                                                                                                                                     | 0  | 0 | 0 | 1  | 0 |
| <i>Aureococcus<br/>anophagefferens</i> * <sup>9</sup><br>(11501)                                                                                                                                                                                      | 3  | 1 | 1 | 1  | 0 |
| <i>Schizochytrium<br/>aggregatum</i> <sup>10</sup> (13373)                                                                                                                                                                                            | 3  | 0 | 1 | 0  | 0 |
| <i>Chattonella subsalsa</i> <sup>11</sup><br>(18256)                                                                                                                                                                                                  | 1  | 0 | 1 | 1  | 0 |
| <i>Heterosigma akashiwo</i> <sup>11</sup><br>(32905)                                                                                                                                                                                                  | 2  | 0 | 4 | 2  | 0 |
| <i>Dinobryon sp.</i> <sup>12</sup> (18284)                                                                                                                                                                                                            | 1  | 1 | 1 | 1  | 0 |
| <i>Ochromonas sp.</i> <sup>12</sup> (16703)                                                                                                                                                                                                           | 3  | 1 | 1 | 6  | 0 |
| <i>Pinguicoccus<br/>pyrenoidosus</i> <sup>13</sup> (10811)                                                                                                                                                                                            | 1  | 1 | 1 | 1  | 0 |
| <i>Vaucheria litorea</i> <sup>14</sup> (8258)                                                                                                                                                                                                         | 1  | 1 | 1 | 2  | 0 |
| <b>Rhizaria</b>                                                                                                                                                                                                                                       |    |   |   |    |   |
| <i>Bigelowiella longifila</i><br>(15959)                                                                                                                                                                                                              | 1  | 1 | 0 | 2  | 1 |
| <i>Lotharella oceanica</i><br>(17354)                                                                                                                                                                                                                 | 2  | 1 | 0 | 4  | 0 |
| <b>Haptophytes</b>                                                                                                                                                                                                                                    |    |   |   |    |   |

|                                                                                                                                                                       |                                                   |                                       |                         |                                                    |                                                      |
|-----------------------------------------------------------------------------------------------------------------------------------------------------------------------|---------------------------------------------------|---------------------------------------|-------------------------|----------------------------------------------------|------------------------------------------------------|
| <i>Guillardia theta</i> * (24840)                                                                                                                                     | 3                                                 | 1                                     | 1                       | 7                                                  | 1                                                    |
| <i>Emiliana huxleyi</i> *<br>(39125)                                                                                                                                  | 2                                                 | 2                                     | 2                       | 8                                                  | 0                                                    |
| <i>Imantonia</i> sp. (14800)                                                                                                                                          | 1                                                 | 1                                     | 0                       | 1                                                  | 1                                                    |
| <i>Isochrysis galbana</i><br>(39744)                                                                                                                                  | 4                                                 | 2                                     | 3                       | 4                                                  | 2                                                    |
| <b>Viridiplantae</b>                                                                                                                                                  |                                                   |                                       |                         |                                                    |                                                      |
| <i>Chlamydomonas euryale</i><br>(19516)                                                                                                                               | 4                                                 | 0                                     | 3                       | 7                                                  | 0                                                    |
| <i>Dunaliella tertiolecta</i><br>(13636)                                                                                                                              | 3                                                 | 1                                     | 2                       | 2                                                  | 0                                                    |
| <i>Micromonas</i> sp. (8956)                                                                                                                                          | 2                                                 | 0                                     | 1                       | 2                                                  | 0                                                    |
| <b>Euglenids<sup>15</sup>, Choanoflagellata<sup>16</sup>, Rhodophyta<sup>17</sup></b>                                                                                 |                                                   |                                       |                         |                                                    |                                                      |
| <i>Eutreptiella gymnastica</i> <sup>15</sup><br>(21956)                                                                                                               | 1                                                 | 0                                     | 0                       | 1                                                  | 0                                                    |
| <i>Acanthoeca</i> -like sp. <sup>16</sup><br>(21655)                                                                                                                  | 2                                                 | 1                                     | 1                       | 3                                                  | 0                                                    |
| <i>Rhodosorus marinus</i> <sup>17</sup><br>(9995)                                                                                                                     | 0                                                 | 0                                     | 1                       | 4                                                  | 1                                                    |
| <i>Porphyridium aerugineum</i> <sup>17</sup> (8890)                                                                                                                   | 0                                                 | 1                                     | 1                       | 1                                                  | 0                                                    |
|                                                                                                                                                                       | <b>Tex-like protein N-terminal domain PF09371</b> | <b>RNA polIII IIC subunit PF09734</b> | <b>TF e(y)2 PF10163</b> | <b>TF/nuclear export subunit protein 2 PF11262</b> | <b>Splicing factor SF3a60 binding domain PF12108</b> |
| <b>Alveolates (basal<sup>1</sup> and core<sup>2</sup> dinoflagellates, ciliates<sup>3</sup>, Apicomplexa<sup>4</sup>, Vitrella<sup>5</sup>, Chromera<sup>6</sup>)</b> |                                                   |                                       |                         |                                                    |                                                      |
| <i>Amoebophrya ceratii</i> <sup>*1</sup><br>(20969)                                                                                                                   | 1                                                 | 1                                     | 1                       | 1                                                  | 1                                                    |
| <i>Noctiluca scintillans</i> <sup>1</sup><br>(40911)                                                                                                                  | 0                                                 | 0                                     | 1                       | 1                                                  | 1                                                    |
| <i>Oxyrrhis marina</i> <sup>1</sup> (34417)                                                                                                                           | 0                                                 | 0                                     | 1                       | 2                                                  | 0                                                    |
| <i>Perkinsus marinus</i> <sup>*1</sup><br>(23654)                                                                                                                     | 1                                                 | 2                                     | 1                       | 1                                                  | 0                                                    |
| <i>Alexandrium fundayense</i> <sup>2</sup><br>(1108345)                                                                                                               | 0                                                 | 3                                     | 1                       | 1                                                  | 1                                                    |
| <i>Amphidinium carterae</i> <sup>2</sup><br>(36236)                                                                                                                   | 0                                                 | 2                                     | 1                       | 1                                                  | 1                                                    |
| <i>Cryptocodinium cohnii</i> <sup>2</sup><br>(48368)                                                                                                                  | 0                                                 | 2                                     | 1                       | 1                                                  | 1                                                    |
| <i>Gambierdiscus australes</i> <sup>2</sup><br>(83402)                                                                                                                | 1                                                 | 2                                     | 2                       | 1                                                  | 1                                                    |
| <i>Gymnodinium catenatum</i> <sup>2</sup><br>(83508)                                                                                                                  | 1                                                 | 1                                     | 1                       | 1                                                  | 2                                                    |
| <i>Heterocapsa triquetra</i> <sup>2</sup><br>(57789)                                                                                                                  | 0                                                 | 1                                     | 1                       | 1                                                  | 1                                                    |
| <i>Karenia brevis</i> <sup>2</sup> (93029)                                                                                                                            | 0                                                 | 2                                     | 1                       | 1                                                  | 1                                                    |
| <i>Karlodinium micrum</i> <sup>2</sup><br>(58585)                                                                                                                     | 0                                                 | 1                                     | 1                       | 1                                                  | 3                                                    |
| <i>Kruptoperidinium foliaceum</i> <sup>2</sup> (162643)                                                                                                               | 2                                                 | 3                                     | 3                       | 3                                                  | 2                                                    |
| <i>Lingulodinium polyerda</i> <sup>2</sup><br>(99361)                                                                                                                 | 1                                                 | 2                                     | 0                       | 1                                                  | 1                                                    |
| <i>Polarella glacialis</i> <sup>2</sup><br>(59754)                                                                                                                    | 1                                                 | 5                                     | 0                       | 2                                                  | 2                                                    |
| <i>Scrippsiella hangoei</i> <sup>2</sup><br>(75339)                                                                                                                   | 1                                                 | 3                                     | 1                       | 1                                                  | 1                                                    |
| <i>Symbiodinium</i> sp. <sup>2</sup><br>(44733)                                                                                                                       | 1                                                 | 1                                     | 1                       | 1                                                  | 1                                                    |
| <i>Togula jolla</i> <sup>2</sup> (42755)                                                                                                                              | 0                                                 | 2                                     | 2                       | 1                                                  | 1                                                    |

|                                                                                                                                                                                                                                                   |   |   |   |   |   |
|---------------------------------------------------------------------------------------------------------------------------------------------------------------------------------------------------------------------------------------------------|---|---|---|---|---|
| <i>Favella ehrenbergii</i> <sup>3</sup><br>(14034)                                                                                                                                                                                                | 0 | 0 | 0 | 0 | 0 |
| <i>Strombidinopsis acuminatum</i> <sup>3</sup> (33155)                                                                                                                                                                                            | 0 | 1 | 4 | 0 | 1 |
| <i>Eimeria tenella</i> * <sup>4</sup> (8597)                                                                                                                                                                                                      | 0 | 1 | 1 | 1 | 0 |
| <i>Neospora caninum</i> * <sup>4</sup><br>(7122)                                                                                                                                                                                                  | 0 | 1 | 1 | 1 | 1 |
| <i>Toxoplasma gondii</i> * <sup>4</sup><br>(8460)                                                                                                                                                                                                 | 0 | 1 | 0 | 1 | 1 |
| <i>Vitrella brassicaformis</i> <sup>5</sup><br>(23743)                                                                                                                                                                                            | 0 | 0 | 1 | 1 | 0 |
| <i>Chromera velia</i> <sup>6</sup> (19244)                                                                                                                                                                                                        | 0 | 1 | 0 | 1 | 1 |
| <b>Stramenopiles (diatoms<sup>7</sup>, Chrysophyceae<sup>8</sup>, Pelagophyceae<sup>9</sup>, Labyrinthulids<sup>10</sup>, Raphidophyceae<sup>11</sup>, Synurophyceae<sup>12</sup>, Dictyochophyceae<sup>13</sup>, Xanthophyceae<sup>14</sup>)</b> |   |   |   |   |   |
| <i>Thalassiosira pseudonana</i> <sup>7</sup><br>(17050)                                                                                                                                                                                           | 0 | 0 | 1 | 1 | 0 |
| <i>Chromulina nebulosa</i> <sup>8</sup><br>(3839)                                                                                                                                                                                                 | 0 | 0 | 0 | 1 | 0 |
| <i>Aureococcus anophagefferens</i> * <sup>9</sup><br>(11501)                                                                                                                                                                                      | 1 | 0 | 0 | 2 | 0 |
| <i>Schizochytrium aggregatum</i> <sup>10</sup> (13373)                                                                                                                                                                                            | 0 | 0 | 1 | 1 | 0 |
| <i>Chattonella subsalsa</i> <sup>11</sup><br>(18256)                                                                                                                                                                                              | 0 | 1 | 0 | 1 | 1 |
| <i>Heterosigma akashiwo</i> <sup>11</sup><br>(32905)                                                                                                                                                                                              | 1 | 0 | 1 | 0 | 1 |
| <i>Dinobryon</i> sp. <sup>12</sup> (18284)                                                                                                                                                                                                        | 0 | 0 | 1 | 1 | 0 |
| <i>Ochromonas</i> sp. <sup>12</sup> (16703)                                                                                                                                                                                                       | 0 | 2 | 0 | 3 | 0 |
| <i>Pinguicoccus pyrenoidosus</i> <sup>13</sup> (10811)                                                                                                                                                                                            | 0 | 1 | 0 | 1 | 0 |
| <i>Vaucheria litorea</i> <sup>14</sup> (8258)                                                                                                                                                                                                     | 0 | 1 | 0 | 1 | 0 |
| <b>Rhizaria</b>                                                                                                                                                                                                                                   |   |   |   |   |   |
| <i>Bigelowiella longifila</i><br>(15959)                                                                                                                                                                                                          | 0 | 0 | 1 | 0 | 1 |
| <i>Lotharella oceanica</i><br>(17354)                                                                                                                                                                                                             | 0 | 1 | 1 | 0 | 1 |
| <b>Haptophytes</b>                                                                                                                                                                                                                                |   |   |   |   |   |
| <i>Guillardia theta</i> * (24840)                                                                                                                                                                                                                 | 0 | 2 | 2 | 2 | 1 |
| <i>Emiliana huxleyi</i> *<br>(39125)                                                                                                                                                                                                              | 2 | 1 | 2 | 2 | 1 |
| <i>Imantonia</i> sp. (14800)                                                                                                                                                                                                                      | 0 | 0 | 1 | 0 | 0 |
| <i>Isochrysis galbana</i><br>(39744)                                                                                                                                                                                                              | 1 | 3 | 2 | 2 | 1 |
| <b>Viridiplantae</b>                                                                                                                                                                                                                              |   |   |   |   |   |
| <i>Chlamydomonas euryale</i><br>(19516)                                                                                                                                                                                                           | 0 | 1 | 1 | 1 | 1 |
| <i>Dunaliella tertiolecta</i><br>(13636)                                                                                                                                                                                                          | 0 | 1 | 0 | 2 | 1 |
| <i>Micromonas</i> sp. (8956)                                                                                                                                                                                                                      | 0 | 1 | 0 | 1 | 0 |
| <b>Euglenids<sup>15</sup>, Choanoflagellata<sup>16</sup>, Rhodophyta<sup>17</sup></b>                                                                                                                                                             |   |   |   |   |   |
| <i>Eutreptiella gymnastica</i> <sup>15</sup><br>(21956)                                                                                                                                                                                           | 0 | 0 | 1 | 0 | 1 |
| <i>Acanthoeca</i> -like sp. <sup>16</sup><br>(21655)                                                                                                                                                                                              | 0 | 1 | 1 | 1 | 0 |
| <i>Rhodorus marinus</i> <sup>17</sup><br>(9995)                                                                                                                                                                                                   | 0 | 1 | 0 | 1 | 0 |
| <i>Porphyridium aerugineum</i> <sup>17</sup> (8890)                                                                                                                                                                                               | 0 | 0 | 0 | 0 | 0 |



|                                                                                                                                                                                                                                                       | GC-rich<br>DNA-<br>binding<br>factor<br>PF07842 | Apoptosis-<br>antagonizing<br>TF, C-terminal<br>PF08164 | TATA-<br>binding<br>protein<br>interacting<br>PF08623 | FACT complex<br>subunit<br>(SPT16/CDC68)<br>PF08644 | TFIIS helical<br>bundle-like<br>domain<br>PF08711 |
|-------------------------------------------------------------------------------------------------------------------------------------------------------------------------------------------------------------------------------------------------------|-------------------------------------------------|---------------------------------------------------------|-------------------------------------------------------|-----------------------------------------------------|---------------------------------------------------|
| <b>Alveolates (basal<sup>1</sup> and core<sup>2</sup> dinoflagellates, ciliates<sup>3</sup>, Apicomplexa<sup>4</sup>, Vitrella<sup>5</sup>, Chromera<sup>6</sup>)</b>                                                                                 |                                                 |                                                         |                                                       |                                                     |                                                   |
| <i>Amoebophrya ceratii</i> * <sup>1</sup><br>(20969)                                                                                                                                                                                                  | 1                                               | 1                                                       | 1                                                     | 2                                                   | 5                                                 |
| <i>Noctiluca scintillans</i> <sup>1</sup><br>(40911)                                                                                                                                                                                                  | 0                                               | 1                                                       | 1                                                     | 1                                                   | 12                                                |
| <i>Oxyrrhis marina</i> <sup>1</sup> (34417)                                                                                                                                                                                                           | 0                                               | 1                                                       | 1                                                     | 1                                                   | 6                                                 |
| <i>Perkinsus marinus</i> * <sup>1</sup><br>(23654)                                                                                                                                                                                                    | 0                                               | 1                                                       | 0                                                     | 2                                                   | 8                                                 |
| <i>Alexandrium catenella</i> <sup>2</sup><br>(1108345)                                                                                                                                                                                                | 2                                               | 1                                                       | 1                                                     | 1                                                   | 22                                                |
| <i>Amphidinium carterae</i> <sup>2</sup><br>(36236)                                                                                                                                                                                                   | 1                                               | 1                                                       | 1                                                     | 1                                                   | 8                                                 |
| <i>Cryptothecodinium cohnii</i> <sup>2</sup><br>(48368)                                                                                                                                                                                               | 1                                               | 1                                                       | 1                                                     | 2                                                   | 12                                                |
| <i>Gambierdiscus australes</i> <sup>2</sup><br>(83402)                                                                                                                                                                                                | 1                                               | 1                                                       | 1                                                     | 3                                                   | 11                                                |
| <i>Gymnodinium catenatum</i> <sup>2</sup><br>(83508)                                                                                                                                                                                                  | 2                                               | 1                                                       | 4                                                     | 2                                                   | 20                                                |
| <i>Heterocapsa triquetra</i> <sup>2</sup><br>(57789)                                                                                                                                                                                                  | 1                                               | 1                                                       | 1                                                     | 1                                                   | 3                                                 |
| <i>Karenia brevis</i> <sup>2</sup> (93029)                                                                                                                                                                                                            | 1                                               | 1                                                       | 2                                                     | 1                                                   | 10                                                |
| <i>Karlodinium micrum</i> <sup>2</sup><br>(58585)                                                                                                                                                                                                     | 1                                               | 1                                                       | 3                                                     | 1                                                   | 8                                                 |
| <i>Kryptoperidinium<br/>foliaceum</i> <sup>2</sup> (162643)                                                                                                                                                                                           | 2                                               | 1                                                       | 5                                                     | 3                                                   | 16                                                |
| <i>Lingulodinium polyerda</i> <sup>2</sup><br>(99361)                                                                                                                                                                                                 | 1                                               | 1                                                       | 1                                                     | 1                                                   | 15                                                |
| <i>Polarella glacialis</i> <sup>2</sup><br>(59754)                                                                                                                                                                                                    | 2                                               | 1                                                       | 1                                                     | 2                                                   | 10                                                |
| <i>Scrippsiella hangoei</i> <sup>2</sup><br>(75339)                                                                                                                                                                                                   | 1                                               | 1                                                       | 1                                                     | 1                                                   | 17                                                |
| <i>Symbiodinium sp.</i> <sup>2</sup><br>(44733)                                                                                                                                                                                                       | 1                                               | 1                                                       | 1                                                     | 1                                                   | 8                                                 |
| <i>Togula jolla</i> <sup>2</sup> (42755)                                                                                                                                                                                                              | 1                                               | 0                                                       | 2                                                     | 2                                                   | 8                                                 |
| <i>Favella ehrenbergii</i> <sup>3</sup><br>(14034)                                                                                                                                                                                                    | 0                                               | 0                                                       | 2                                                     | 2                                                   | 0                                                 |
| <i>Strombidinopsis<br/>acuminatum</i> <sup>3</sup> (33155)                                                                                                                                                                                            | 0                                               | 0                                                       | 0                                                     | 0                                                   | 5                                                 |
| <i>Eimeria tenella</i> * <sup>4</sup> (8597)                                                                                                                                                                                                          | 2                                               | 1                                                       | 0                                                     | 1                                                   | 1                                                 |
| <i>Neospora caninum</i> * <sup>4</sup><br>(7122)                                                                                                                                                                                                      | 1                                               | 1                                                       | 0                                                     | 1                                                   | 2                                                 |
| <i>Toxoplasma gondii</i> * <sup>4</sup><br>(8460)                                                                                                                                                                                                     | 1                                               | 1                                                       | 1                                                     | 1                                                   | 3                                                 |
| <i>Vitrella brassicaformis</i> <sup>5</sup><br>(23743)                                                                                                                                                                                                | 2                                               | 1                                                       | 1                                                     | 1                                                   | 1                                                 |
| <i>Chromera velia</i> <sup>6</sup> (19244)                                                                                                                                                                                                            | 1                                               | 1                                                       | 1                                                     | 1                                                   | 2                                                 |
| <b>Stramenopiles (diatoms<sup>7</sup>, Chrysophyceae<sup>8</sup>, Pelagophyceae<sup>9</sup>, Labyrinthulids<sup>10</sup>, Raphidophyceae<sup>11</sup>,<br/>Synurophyceae<sup>12</sup>, Dictyochophyceae<sup>13</sup>, Xanthophyceae<sup>14</sup>)</b> |                                                 |                                                         |                                                       |                                                     |                                                   |
| <i>Thalassiosira pseudonana</i> <sup>7</sup><br>(17050)                                                                                                                                                                                               | 0                                               | 2                                                       | 1                                                     | 1                                                   | 5                                                 |
| <i>Chromulina nebulosa</i> <sup>8</sup><br>(3839)                                                                                                                                                                                                     | 0                                               | 0                                                       | 0                                                     | 0                                                   | 0                                                 |
| <i>Aureococcus<br/>anophagefferens</i> * <sup>9</sup><br>(11501)                                                                                                                                                                                      | 0                                               | 0                                                       | 0                                                     | 2                                                   | 4                                                 |

|                                                                                                                                                                       |   |   |   |    |    |
|-----------------------------------------------------------------------------------------------------------------------------------------------------------------------|---|---|---|----|----|
| <i>Schizochytrium aggregatum</i> <sup>10</sup> (13373)                                                                                                                | 1 | 1 | 1 | 1  | 3  |
| <i>Chattonella subsalsa</i> <sup>11</sup> (18256)                                                                                                                     | 1 | 1 | 1 | 1  | 7  |
| <i>Heterosigma akashiwo</i> <sup>11</sup> (32905)                                                                                                                     | 0 | 1 | 1 | 1  | 2  |
| <i>Dinobryon</i> sp. <sup>12</sup> (18284)                                                                                                                            | 5 | 1 | 1 | 4  | 3  |
| <i>Ochromonas</i> sp. <sup>12</sup> (16703)                                                                                                                           | 0 | 1 | 1 | 1  | 4  |
| <i>Pinguicoccus pyrenoidosus</i> <sup>13</sup> (10811)                                                                                                                | 2 | 0 | 1 | 1  | 3  |
| <i>Vaucheria litorea</i> <sup>14</sup> (8258)                                                                                                                         | 2 | 1 | 1 | 1  | 2  |
| <b>Rhizaria</b>                                                                                                                                                       |   |   |   |    |    |
| <i>Bigelowiella longifila</i> (15959)                                                                                                                                 | 2 | 1 | 2 | 0  | 2  |
| <i>Lotharella oceanica</i> (17354)                                                                                                                                    | 2 | 1 | 2 | 1  | 2  |
| <b>Haptophytes</b>                                                                                                                                                    |   |   |   |    |    |
| <i>Guillardia theta</i> * (24840)                                                                                                                                     | 0 | 1 | 1 | 1  | 2  |
| <i>Emiliana huxleyi</i> * (39125)                                                                                                                                     | 1 | 2 | 1 | 0  | 5  |
| <i>Imantonia</i> sp. (14800)                                                                                                                                          | 0 | 0 | 1 | 1  | 3  |
| <i>Isochrysis galbana</i> (39744)                                                                                                                                     | 3 | 1 | 2 | 2  | 11 |
| <b>Viridiplantae</b>                                                                                                                                                  |   |   |   |    |    |
| <i>Chlamydomonas euryale</i> (19516)                                                                                                                                  | 2 | 1 | 1 | 1  | 2  |
| <i>Dunaliella tertiolecta</i> (13636)                                                                                                                                 | 2 | 1 | 1 | 1  | 3  |
| <i>Micromonas</i> sp. (8956)                                                                                                                                          | 2 | 0 | 1 | 1  | 5  |
| <b>Euglenids<sup>15</sup>, Choanoflagellata<sup>16</sup>, Rhodophyta<sup>17</sup></b>                                                                                 |   |   |   |    |    |
| <i>Eutreptiella gymnastica</i> <sup>15</sup> (21956)                                                                                                                  | 1 | 0 | 1 | 1  | 3  |
| <i>Acanthoeca</i> -like sp. <sup>16</sup> (21655)                                                                                                                     | 2 | 1 | 1 | 1  | 2  |
| <i>Rhodosorus marinus</i> <sup>17</sup> (9995)                                                                                                                        | 2 | 1 | 1 | 2  | 2  |
| <i>Porphyridium aerugineum</i> <sup>17</sup> (8890)                                                                                                                   | 1 | 0 | 1 | 1  | 0  |
| <b>Alveolates (basal<sup>1</sup> and core<sup>2</sup> dinoflagellates, ciliates<sup>3</sup>, Apicomplexa<sup>4</sup>, Vitrella<sup>5</sup>, Chromera<sup>6</sup>)</b> |   |   |   |    |    |
| <i>Amoebophrya ceratii</i> * <sup>1</sup> (20969)                                                                                                                     | 1 | 1 | 1 | 10 | 1  |
| <i>Noctiluca scintillans</i> <sup>1</sup> (40911)                                                                                                                     | 1 | 0 | 1 | 4  | 1  |
| <i>Oxyrrhis marina</i> <sup>1</sup> (34417)                                                                                                                           | 0 | 0 | 2 | 2  | 1  |
| <i>Perkinsus marinus</i> * <sup>1</sup> (23654)                                                                                                                       | 1 | 0 | 4 | 3  | 1  |
| <i>Alexandrium catenella</i> <sup>2</sup> (1108345)                                                                                                                   | 1 | 0 | 1 | 9  | 1  |
| <i>Amphidinium carterae</i> <sup>2</sup> (36236)                                                                                                                      | 1 | 0 | 1 | 4  | 0  |
| <i>Cryptothecodinium cohnii</i> <sup>2</sup> (48368)                                                                                                                  | 1 | 0 | 0 | 4  | 1  |
| <i>Gambierdiscus australes</i> <sup>2</sup>                                                                                                                           | 2 | 0 | 2 | 5  | 1  |

**Spt4/RpoE2 zinc finger PF06093**     
**Glucose-regulated metallo-peptidase M90 PF06167**     
**Sin3 associated polypeptide p18 (SAP18) PF06487**     
**DEAD\_2 PF06733**     
**HCNGP-like protein PF07818**

|                                                                                                                                                                                                                                                       |   |   |   |   |   |
|-------------------------------------------------------------------------------------------------------------------------------------------------------------------------------------------------------------------------------------------------------|---|---|---|---|---|
| (83402)                                                                                                                                                                                                                                               |   |   |   |   |   |
| <i>Gymnodinium catenatum</i> <sup>2</sup><br>(83508)                                                                                                                                                                                                  | 0 | 0 | 3 | 8 | 1 |
| <i>Heterocapsa triquetra</i> <sup>2</sup><br>(57789)                                                                                                                                                                                                  | 1 | 0 | 1 | 3 | 1 |
| <i>Karenia brevis</i> <sup>2</sup> (93029)                                                                                                                                                                                                            | 1 | 0 | 1 | 6 | 1 |
| <i>Karlodinium micrum</i> <sup>2</sup><br>(58585)                                                                                                                                                                                                     | 1 | 0 | 3 | 4 | 1 |
| <i>Kryptoperidinium<br/>foliaceum</i> <sup>2</sup> (162643)                                                                                                                                                                                           | 2 | 0 | 2 | 6 | 1 |
| <i>Lingulodinium polyerda</i> <sup>2</sup><br>(99361)                                                                                                                                                                                                 | 0 | 0 | 1 | 4 | 0 |
| <i>Polarella glacialis</i> <sup>2</sup><br>(59754)                                                                                                                                                                                                    | 2 | 0 | 1 | 6 | 0 |
| <i>Scrippsiella hangoei</i> <sup>2</sup><br>(75339)                                                                                                                                                                                                   | 1 | 0 | 2 | 5 | 1 |
| <i>Symbiodinium sp.</i> <sup>2</sup><br>(44733)                                                                                                                                                                                                       | 1 | 0 | 2 | 5 | 1 |
| <i>Togula jolla</i> <sup>2</sup> (42755)                                                                                                                                                                                                              | 1 | 0 | 1 | 6 | 1 |
| <i>Favella ehrenbergii</i> <sup>3</sup><br>(14034)                                                                                                                                                                                                    | 0 | 0 | 0 | 0 | 0 |
| <i>Strombidinopsis<br/>acuminatum</i> <sup>3</sup> (33155)                                                                                                                                                                                            | 1 | 0 | 1 | 0 | 0 |
| <i>Eimeria tenella</i> * <sup>4</sup> (8597)                                                                                                                                                                                                          | 1 | 0 | 1 | 3 | 1 |
| <i>Neospora caninum</i> * <sup>4</sup><br>(7122)                                                                                                                                                                                                      | 1 | 0 | 1 | 4 | 1 |
| <i>Toxoplasma gondii</i> * <sup>4</sup><br>(8460)                                                                                                                                                                                                     | 1 | 0 | 1 | 4 | 1 |
| <i>Vitrella brassicaformis</i> <sup>5</sup><br>(23743)                                                                                                                                                                                                | 0 | 0 | 1 | 0 | 0 |
| <i>Chromera velia</i> <sup>6</sup> (19244)                                                                                                                                                                                                            | 0 | 0 | 1 | 2 | 1 |
| <b>Stramenopiles (diatoms<sup>7</sup>, Chrysophyceae<sup>8</sup>, Pelagophyceae<sup>9</sup>, Labyrinthulids<sup>10</sup>, Raphidophyceae<sup>11</sup>,<br/>Synurophyceae<sup>12</sup>, Dictyochophyceae<sup>13</sup>, Xanthophyceae<sup>14</sup>)</b> |   |   |   |   |   |
| <i>Thalassiosira pseudonana</i> <sup>7</sup><br>(17050)                                                                                                                                                                                               | 1 | 0 | 0 | 2 | 0 |
| <i>Chromulina nebulosa</i> <sup>8</sup><br>(3839)                                                                                                                                                                                                     | 0 | 0 | 0 | 0 | 0 |
| <i>Aureococcus<br/>anophagefferens</i> * <sup>9</sup><br>(11501)                                                                                                                                                                                      | 1 | 0 | 1 | 3 | 0 |
| <i>Schizochytrium<br/>aggregatum</i> <sup>10</sup> (13373)                                                                                                                                                                                            | 1 | 0 | 0 | 2 | 0 |
| <i>Chattonella subsalsa</i> <sup>11</sup><br>(18256)                                                                                                                                                                                                  | 1 | 0 | 1 | 2 | 1 |
| <i>Heterosigma akashiwo</i> <sup>11</sup><br>(32905)                                                                                                                                                                                                  | 1 | 0 | 1 | 0 | 1 |
| <i>Dinobryon sp.</i> <sup>12</sup> (18284)                                                                                                                                                                                                            | 1 | 0 | 0 | 1 | 0 |
| <i>Ochromonas sp.</i> <sup>12</sup> (16703)                                                                                                                                                                                                           | 1 | 0 | 1 | 1 | 1 |
| <i>Pinguicoccus<br/>pyrenoidosus</i> <sup>13</sup> (10811)                                                                                                                                                                                            | 0 | 0 | 0 | 1 | 0 |
| <i>Vaucheria litorea</i> <sup>14</sup> (8258)                                                                                                                                                                                                         | 1 | 0 | 0 | 0 | 1 |
| <b>Rhizaria</b>                                                                                                                                                                                                                                       |   |   |   |   |   |
| <i>Bigelowiella longifila</i><br>(15959)                                                                                                                                                                                                              | 1 | 0 | 1 | 0 | 1 |
| <i>Lotharella oceanica</i><br>(17354)                                                                                                                                                                                                                 | 1 | 0 | 1 | 0 | 1 |
| <b>Haptophytes</b>                                                                                                                                                                                                                                    |   |   |   |   |   |
| <i>Guillardia theta</i> * (24840)                                                                                                                                                                                                                     | 1 | 0 | 1 | 4 | 1 |
| <i>Emiliana huxleyi</i> *<br>(39125)                                                                                                                                                                                                                  | 2 | 0 | 1 | 4 | 0 |

|                                                                                                                                                                       |   |   |   |   |   |
|-----------------------------------------------------------------------------------------------------------------------------------------------------------------------|---|---|---|---|---|
| <i>Imantonia</i> sp. (14800)                                                                                                                                          | 1 | 0 | 1 | 1 | 2 |
| <i>Isochrysis galbana</i><br>(39744)                                                                                                                                  | 2 | 0 | 2 | 6 | 2 |
| <b>Viridiplantae</b>                                                                                                                                                  |   |   |   |   |   |
| <i>Chlamydomonas euryale</i><br>(19516)                                                                                                                               | 1 | 0 | 1 | 1 | 1 |
| <i>Dunaliella tertiolecta</i><br>(13636)                                                                                                                              | 1 | 0 | 1 | 2 | 1 |
| <i>Micromonas</i> sp. (8956)                                                                                                                                          | 0 | 0 | 0 | 5 | 0 |
| <b>Euglenids<sup>15</sup>, Choanoflagellata<sup>16</sup>, Rhodophyta<sup>17</sup></b>                                                                                 |   |   |   |   |   |
| <i>Eutreptiella gymnastica</i> <sup>15</sup><br>(21956)                                                                                                               | 0 | 0 | 1 | 0 | 0 |
| <i>Acanthoeca</i> -like sp. <sup>16</sup><br>(21655)                                                                                                                  | 1 | 0 | 2 | 2 | 1 |
| <i>Rhodosorus marinus</i> <sup>17</sup><br>(9995)                                                                                                                     | 1 | 0 | 0 | 5 | 3 |
| <i>Porphyridium aerugineum</i> <sup>17</sup> (8890)                                                                                                                   | 0 | 0 | 0 | 3 | 0 |
| <b>(DUF3819)<br/>in CCR4 Not1. PF12842      Hinge domain PF14327</b>                                                                                                  |   |   |   |   |   |
| <b>Alveolates (basal<sup>1</sup> and core<sup>2</sup> dinoflagellates, ciliates<sup>3</sup>, Apicomplexa<sup>4</sup>, Vitrella<sup>5</sup>, Chromera<sup>6</sup>)</b> |   |   |   |   |   |
| <i>Amoebophrya ceratii</i> * <sup>1</sup><br>(20969)                                                                                                                  | 1 | 1 |   |   |   |
| <i>Noctiluca scintillans</i> <sup>1</sup><br>(40911)                                                                                                                  | 1 | 3 |   |   |   |
| <i>Oxyrrhis marina</i> <sup>1</sup> (34417)                                                                                                                           | 0 | 2 |   |   |   |
| <i>Perkinsus marinus</i> * <sup>1</sup><br>(23654)                                                                                                                    | 3 | 4 |   |   |   |
| <i>Alexandrium catenella</i> <sup>2</sup><br>(1108345)                                                                                                                | 1 | 2 |   |   |   |
| <i>Amphidinium carterae</i> <sup>2</sup><br>(36236)                                                                                                                   | 1 | 3 |   |   |   |
| <i>Cryptocodinium cohnii</i> <sup>2</sup><br>(48368)                                                                                                                  | 1 | 3 |   |   |   |
| <i>Gambierdiscus australes</i> <sup>2</sup><br>(83402)                                                                                                                | 1 | 3 |   |   |   |
| <i>Gymnodinium catenatum</i> <sup>2</sup><br>(83508)                                                                                                                  | 4 | 3 |   |   |   |
| <i>Heterocapsa triquetra</i> <sup>2</sup><br>(57789)                                                                                                                  | 0 | 1 |   |   |   |
| <i>Karenia brevis</i> <sup>2</sup> (93029)                                                                                                                            | 0 | 3 |   |   |   |
| <i>Karlodinium micrum</i> <sup>2</sup><br>(58585)                                                                                                                     | 1 | 3 |   |   |   |
| <i>Kryptoperidinium foliaceum</i> <sup>2</sup> (162643)                                                                                                               | 3 | 5 |   |   |   |
| <i>Lingulodinium polyerda</i> <sup>2</sup><br>(99361)                                                                                                                 | 0 | 4 |   |   |   |
| <i>Polarella glacialis</i> <sup>2</sup><br>(59754)                                                                                                                    | 0 | 1 |   |   |   |
| <i>Scrippsiella hangoei</i> <sup>2</sup><br>(75339)                                                                                                                   | 1 | 3 |   |   |   |
| <i>Symbiodinium</i> sp. <sup>2</sup><br>(44733)                                                                                                                       | 1 | 2 |   |   |   |
| <i>Togula jolla</i> <sup>2</sup> (42755)                                                                                                                              | 0 | 2 |   |   |   |
| <i>Favella ehrenbergii</i> <sup>3</sup><br>(14034)                                                                                                                    | 0 | 0 |   |   |   |
| <i>Strombidinopsis acuminatum</i> <sup>3</sup> (33155)                                                                                                                | 6 | 0 |   |   |   |

|                                                                                                                                                                                                                                                   |   |   |
|---------------------------------------------------------------------------------------------------------------------------------------------------------------------------------------------------------------------------------------------------|---|---|
| <i>Eimeria tenella</i> * <sup>4</sup> (8597)                                                                                                                                                                                                      | 0 | 0 |
| <i>Neospora caninum</i> * <sup>4</sup> (7122)                                                                                                                                                                                                     | 1 | 1 |
| <i>Toxoplasma gondii</i> * <sup>4</sup> (8460)                                                                                                                                                                                                    | 1 | 1 |
| <i>Vitrella brassicaformis</i> <sup>5</sup> (23743)                                                                                                                                                                                               | 2 | 1 |
| <i>Chromera velia</i> <sup>6</sup> (19244)                                                                                                                                                                                                        | 0 | 1 |
| <b>Stramenopiles (diatoms<sup>7</sup>, Chrysophyceae<sup>8</sup>, Pelagophyceae<sup>9</sup>, Labyrinthulids<sup>10</sup>, Raphidophyceae<sup>11</sup>, Synurophyceae<sup>12</sup>, Dictyochophyceae<sup>13</sup>, Xanthophyceae<sup>14</sup>)</b> |   |   |
| <i>Thalassiosira pseudonana</i> <sup>7</sup> (17050)                                                                                                                                                                                              | 1 | 0 |
| <i>Chromulina nebulosa</i> <sup>8</sup> (3839)                                                                                                                                                                                                    | 0 | 1 |
| <i>Aureococcus anophagefferens</i> * <sup>9</sup> (11501)                                                                                                                                                                                         | 1 | 0 |
| <i>Schizochytrium aggregatum</i> <sup>10</sup> (13373)                                                                                                                                                                                            | 0 | 1 |
| <i>Chattonella subsalsa</i> <sup>11</sup> (18256)                                                                                                                                                                                                 | 1 | 2 |
| <i>Heterosigma akashiwo</i> <sup>11</sup> (32905)                                                                                                                                                                                                 | 0 | 1 |
| <i>Dinobryon</i> sp. <sup>12</sup> (18284)                                                                                                                                                                                                        | 1 | 0 |
| <i>Ochromonas</i> sp. <sup>12</sup> (16703)                                                                                                                                                                                                       | 1 | 0 |
| <i>Pinguicoccus pyrenoidosus</i> <sup>13</sup> (10811)                                                                                                                                                                                            | 1 | 0 |
| <i>Vaucheria litorea</i> <sup>14</sup> (8258)                                                                                                                                                                                                     | 1 | 1 |
| <b>Rhizaria</b>                                                                                                                                                                                                                                   |   |   |
| <i>Bigelowiella longifila</i> (15959)                                                                                                                                                                                                             | 0 | 1 |
| <i>Lotharella oceanica</i> (17354)                                                                                                                                                                                                                | 0 | 1 |
| <b>Haptophytes</b>                                                                                                                                                                                                                                |   |   |
| <i>Guillardia theta</i> * (24840)                                                                                                                                                                                                                 | 1 | 1 |
| <i>Emiliana huxleyi</i> * (39125)                                                                                                                                                                                                                 | 1 | 0 |
| <i>Imantonia</i> sp. (14800)                                                                                                                                                                                                                      | 0 | 1 |
| <i>Isochrysis galbana</i> (39744)                                                                                                                                                                                                                 | 2 | 2 |
| <b>Viridiplantae</b>                                                                                                                                                                                                                              |   |   |
| <i>Chlamydomonas euryale</i> (19516)                                                                                                                                                                                                              | 1 | 2 |
| <i>Dunaliella tertiolecta</i> (13636)                                                                                                                                                                                                             | 1 | 1 |
| <i>Micromonas</i> sp. (8956)                                                                                                                                                                                                                      | 1 | 0 |
| <b>Euglenids<sup>15</sup>, Choanoflagellata<sup>16</sup>, Rhodophyta<sup>17</sup></b>                                                                                                                                                             |   |   |
| <i>Eutreptiella gymnastica</i> <sup>15</sup> (21956)                                                                                                                                                                                              | 1 | 0 |
| <i>Acanthoeca</i> -like sp. <sup>16</sup> (21655)                                                                                                                                                                                                 | 1 | 1 |
| <i>Rhodosorus marinus</i> <sup>17</sup> (9995)                                                                                                                                                                                                    | 1 | 2 |
| <i>Porphyridium aerugineum</i> <sup>17</sup> (8890)                                                                                                                                                                                               | 1 | 0 |

## B

| <i>Organism</i>                      | <i>Strain number</i> | <i>Library number</i>                          | <i>No. of peptides</i> |
|--------------------------------------|----------------------|------------------------------------------------|------------------------|
| <i>Noctiluca scintillans</i>         | NC                   | MMETSP0253                                     | 40911                  |
| <i>Oxyrrhis marina</i>               | LB1974               | combined MMETSP1424-25-26                      | 34417                  |
| <i>Perkinsus marinus</i> *           | ATCC50983            | Accession numbers EEQ97081-<br>EER20735        | 23654                  |
| <i>Alexandrium catenella</i>         | 38-3                 | Accession numbers GAIV01000001-<br>01108345    | 1108345                |
| <i>Amphidinium carterae</i>          | CCMP1314             | combined MMETSP0258-259-398                    | 36236                  |
| <i>Cryptocodinium cohnii</i>         | Seligo               | combined MMETSP0323-326                        | 48368                  |
| <i>Gambierdiscus australes</i>       | CAWD149              | Kohli et al 2015                               | 83402                  |
| <i>Gymnodinium catenatum</i>         | GC744                | MMETSP0784                                     | 83508                  |
| <i>Heterocapsa triquetra</i>         | CCMP448              | MMETSP0448                                     | 57789                  |
| <i>Karenia brevis</i>                | Wilson               | combined MMETSP0201-02-648-49                  | 93029                  |
| <i>Karlodinium micrum</i>            | CCMP2283             | combined MMETSP1015-16-17                      | 58585                  |
| <i>Kryptoperidinium foliaceum</i>    | CCMP1326             | combined MMETSP0120-121                        | 162643                 |
| <i>Lingulodinium polyerda</i>        | CCMP1738             | combined MMETSP1032-33-34-35                   | 99361                  |
| <i>Polarella glacialis</i>           | CCMP1383             | MMETSP0227                                     | 59754                  |
| <i>Scrippsiella hangoei</i>          | SHTV-5               | combined MMETSP0359-360-361                    | 75339                  |
| <i>Symbiodinium</i> sp.              | Ccmp2430             | combined MMETSP1115-16-17                      | 44733                  |
| <i>Togula jolla</i>                  | CCCM725              | MMETSP0224                                     | 42755                  |
| <i>Favella ehrenbergii</i>           | fehrel               | MMETSP123                                      | 14034                  |
| <i>Strombidinopsis acuminatum</i>    | MMETSP0123           | MMETSP0126                                     | 33155                  |
| <i>Eimeria tenella</i> *             | ETH                  | toxodb.com                                     | 8597                   |
| <i>Neospora caninum</i> *            | NCLIV                | toxodb.com                                     | 7122                   |
| <i>Toxoplasma gondii</i> *           | GT1                  | toxodb.com                                     | 8460                   |
| <i>Vitrella brassicaformis</i>       | CCMP3346             | MMETSP1451                                     | 23743                  |
| <i>Chromera velia</i>                | CCMP2878             | MMETSP0290                                     | 19244                  |
| <i>Thalassiosira pseudonana</i>      | GMp14c1              | combined MMETSP0492-93-94                      | 17050                  |
| <i>Chromulina nebulosa</i>           | UTEXLB2642           | MMETSP1095                                     | 3839                   |
| <i>Aureococcus anophagefferens</i> * | CCMP1850             | Gobler et al., 2011                            | 11501                  |
| <i>Schizochytrium aggregatum</i>     | ATCC28209            | MMETSP0962-63-64-65                            | 13373                  |
| <i>Chattonella subsalsa</i>          | CCMP2191             | combined MMETSP0947-48-49-50                   | 18256                  |
| <i>Heterosigma akashiwo</i>          | NB                   | combined MMETSP0414-15-16                      | 32905                  |
| <i>Dinobryon</i> sp.                 | UTEXLB2267           | combined MMETSP0019,<br>MMETSP0020, MMETSP0812 | 18284                  |
| <i>Ochromonas</i> sp.                | CCMP1393             | combined MMETSP0004-5                          | 16703                  |
| <i>Pinguicoccus pyrenoidosus</i>     | CCMP2078             | MMETSP1160                                     | 10811                  |
| <i>Vaucheria litorea</i>             | CCMP2940             | combined MMETSP0945-46                         | 8258                   |
| <i>Bigelowiella longifila</i>        | CCMP242              | MMETSP1359                                     | 15959                  |
| <i>Lotharella oceanica</i>           | CCMP622              | MMETSP0040                                     | 17354                  |
| <i>Guillardia thet</i> *             | CCMP2712             | Curtis et al., 2012                            | 24840                  |
| <i>Emiliana huxleyi</i> *            | CCMP1516             | Read et al., 2013                              | 39125                  |
| <i>Imantonia</i> sp.                 | RCC918               | MMETSP1474                                     | 14800                  |
| <i>Isochrysis galbana</i>            | CCMP1323             | combined MMETSP0943-44-45                      | 39744                  |
| <i>Chlamydomonas euryale</i>         | CCMP219              | MMETSP0063                                     | 19516                  |
| <i>Dunaliella tertiolecta</i>        | CCMP1320             | combined MMETSP1126-28                         | 13636                  |
| <i>Micromonas</i> sp.                | CCMP2099             | combined MMETSP1082, MMETSP1386                | 8956                   |
| <i>Eutreptiella gymnastica</i>       | CCMP1594             | MMETSP0809-10-11                               | 21956                  |
| <i>Acanthoeca</i> -like sp.          | 10tr                 | MMETSP0105-06                                  | 21655                  |
| <i>Rhodorus marinus</i>              | CCMP769              | MMETSP0011                                     | 9995                   |
| <i>Porphyridium aerugineum</i>       | SAG1380              | MMETSP0313                                     | 8890                   |

**Table S3. SL detected in the genome of *A. ceratii*.** (A) Predicted genes with 5' adjacent SL sequences. (B) Distribution of full length SL on scaffolds of *A. ceratii*. There are three scaffolds (*Italic, Underline*) which contain more than one SL-sequence. (C) Distribution of truncated SL (length of match > 15 nt, accuracy > 70%) in scaffolds of *A. ceratii* genome. (D) Position of truncated SL (length of match > 15 nt, accuracy > 70%) in scaffolds of *A. ceratii* genome.

**A**

| Sequence ID | Hit length | Hit start | Hit end | Hit strand | Function                                               |
|-------------|------------|-----------|---------|------------|--------------------------------------------------------|
| g18355.t1   | 16.00      | 4738      | 4753    | Plus       | Unknown                                                |
| g6020.t1    | 15.00      | 25        | 11      | Minus      | Uncharacterized protein containing DHHC-type Zn finger |
| g13239.t1   | 13.00      | 292       | 304     | Plus       | Unknown                                                |
| g11183.t1   | 13.00      | 348       | 336     | Minus      | Pentatricopeptide repeat-containing protein At1g62930  |
| g3407.t1    | 13.00      | 3292      | 3304    | Plus       | Unknown                                                |

**B**

| Sequence ID        | Hit length | Hit start | Hit end | Hit strand |
|--------------------|------------|-----------|---------|------------|
| scaffold1189       | 21         | 32704     | 32724   | Minus      |
| scaffold1205       | 21         | 43000     | 43020   | Minus      |
| scaffold1270       | 21         | 12201     | 12221   | Plus       |
| scaffold1289       | 21         | 18168     | 18188   | Plus       |
| scaffold1308       | 21         | 40822     | 40842   | Plus       |
| scaffold132        | 21         | 41109     | 41129   | Plus       |
| scaffold1320       | 21         | 19617     | 19637   | Minus      |
| scaffold1358       | 21         | 1354      | 1374    | Plus       |
| scaffold1359       | 21         | 11485     | 11505   | Plus       |
| scaffold1385       | 21         | 14549     | 14569   | Plus       |
| scaffold1398       | 21         | 23563     | 23583   | Plus       |
| scaffold1458       | 21         | 309       | 329     | Minus      |
| scaffold1489       | 21         | 25315     | 25335   | Plus       |
| scaffold17         | 21         | 6576      | 6596    | Minus      |
| scaffold1737       | 21         | 4962      | 4982    | Plus       |
| scaffold180        | 21         | 268396    | 268416  | Plus       |
| scaffold2066       | 21         | 3630      | 3650    | Plus       |
| scaffold2171       | 21         | 7973      | 7993    | Plus       |
| scaffold2275       | 21         | 4514      | 4534    | Minus      |
| scaffold2289       | 21         | 8172      | 8192    | Minus      |
| scaffold233        | 21         | 81864     | 81884   | Plus       |
| scaffold2671       | 21         | 36        | 56      | Minus      |
| scaffold283        | 21         | 211262    | 211282  | Plus       |
| <u>scaffold286</u> | 21         | 34005     | 34025   | Minus      |
| <u>scaffold286</u> | 21         | 25201     | 25221   | Minus      |
| scaffold297        | 21         | 106066    | 106086  | Plus       |
| scaffold3000       | 21         | 7663      | 7683    | Plus       |
| scaffold307        | 21         | 85828     | 85848   | Plus       |



|                    |    |        |        |       |
|--------------------|----|--------|--------|-------|
| <u>scaffold309</u> | 21 | 71658  | 71678  | Plus  |
| <u>scaffold309</u> | 21 | 74700  | 74720  | Plus  |
| scaffold329        | 21 | 225792 | 225812 | Minus |
| scaffold3442       | 21 | 973    | 993    | Minus |
| scaffold37         | 21 | 271411 | 271431 | Minus |
| scaffold381        | 21 | 4775   | 4795   | Minus |
| scaffold385        | 21 | 8435   | 8455   | Minus |
| scaffold3942       | 21 | 282    | 302    | Minus |
| scaffold4061       | 21 | 1083   | 1103   | Plus  |
| <u>scaffold48</u>  | 21 | 17146  | 17166  | Plus  |
| <u>scaffold48</u>  | 21 | 215298 | 215318 | Plus  |
| scaffold544        | 21 | 63960  | 63980  | Plus  |
| scaffold549        | 21 | 2921   | 2941   | Minus |
| scaffold574        | 21 | 85014  | 85034  | Plus  |
| scaffold600        | 21 | 7053   | 7073   | Plus  |
| scaffold61         | 21 | 114241 | 114261 | Plus  |
| scaffold656        | 21 | 1686   | 1706   | Plus  |
| scaffold68         | 21 | 131099 | 131119 | Minus |
| scaffold811        | 21 | 61758  | 61778  | Minus |
| scaffold820        | 21 | 12792  | 12812  | Minus |
| scaffold912        | 21 | 56882  | 56902  | Plus  |
| scaffold94         | 21 | 33762  | 33782  | Minus |
| scaffold956        | 21 | 41864  | 41884  | Minus |
| scaffold958        | 21 | 1772   | 1792   | Minus |

---

### C

| Sequence ID  | Sequence length | Number of truncated SL* |
|--------------|-----------------|-------------------------|
| scaffold61   | 406243          | 56                      |
| scaffold544  | 230577          | 53                      |
| scaffold180  | 286137          | 47                      |
| scaffold329  | 318215          | 42                      |
| scaffold48   | 276268          | 41                      |
| scaffold68   | 248039          | 40                      |
| scaffold37   | 324791          | 37                      |
| scaffold17   | 333242          | 35                      |
| scaffold286  | 196863          | 35                      |
| scaffold283  | 211282          | 28                      |
| scaffold1358 | 40547           | 26                      |
| scaffold309  | 124822          | 24                      |
| scaffold233  | 133269          | 23                      |
| scaffold94   | 168647          | 22                      |
| scaffold811  | 107907          | 20                      |
| scaffold297  | 150960          | 18                      |
| scaffold381  | 76577           | 18                      |
| scaffold132  | 124252          | 16                      |
| scaffold1189 | 72863           | 15                      |
| scaffold307  | 88209           | 13                      |
| scaffold1385 | 64388           | 12                      |
| scaffold574  | 85034           | 12                      |

|              |       |    |
|--------------|-------|----|
| scaffold820  | 86658 | 11 |
| scaffold956  | 84797 | 11 |
| scaffold1489 | 38893 | 10 |
| scaffold958  | 45976 | 9  |
| scaffold1205 | 59972 | 8  |
| scaffold385  | 40098 | 8  |
| scaffold1289 | 45660 | 7  |
| scaffold1308 | 47888 | 7  |
| scaffold600  | 54455 | 7  |
| scaffold1737 | 13558 | 6  |
| scaffold549  | 37577 | 6  |
| scaffold1398 | 42967 | 5  |
| scaffold912  | 59273 | 5  |
| scaffold1458 | 27774 | 4  |
| scaffold656  | 38666 | 4  |
| scaffold1359 | 45323 | 3  |
| scaffold2066 | 8694  | 3  |
| scaffold2171 | 8014  | 3  |

\* positions were provided in D

## D

| Sequence     | Length | Start  | End    | Match           | Length match | Accuracy (%) | Found at strand |
|--------------|--------|--------|--------|-----------------|--------------|--------------|-----------------|
| scaffold544  | 230577 | 211334 | 211348 | CCATTTTGGCTCAAG | 15           | 100          | Negative        |
| scaffold385  | 40098  | 8420   | 8434   | CCATTTTGGCTCAAG | 15           | 100          | Negative        |
| scaffold1489 | 38893  | 21759  | 21773  | CCATTTTGGCTCAAG | 15           | 100          | Negative        |
| scaffold180  | 286137 | 179354 | 179368 | CCATTTGGGCTCAAG | 15           | 93           | Positive        |
| scaffold286  | 196863 | 31255  | 31269  | CCATTTTGGCTCAAT | 15           | 93           | Negative        |
| scaffold286  | 196863 | 185923 | 185937 | CCATCTTGGCTCAAG | 15           | 93           | Negative        |
| scaffold1308 | 47888  | 11001  | 11015  | GCATTTTGGCTCAAG | 15           | 93           | Negative        |
| scaffold1489 | 38893  | 25395  | 25409  | CCATTTTGGCTGAAG | 15           | 93           | Positive        |
| scaffold2066 | 8694   | 4637   | 4651   | CCATTTTGGCTCCAG | 15           | 93           | Positive        |
| scaffold2066 | 8694   | 4609   | 4623   | CCATTTTGGCTCATG | 15           | 93           | Positive        |
| scaffold17   | 333242 | 292748 | 292762 | CCATTGTGGCTCAAT | 15           | 86           | Negative        |
| scaffold329  | 318215 | 24682  | 24696  | CCATTTTCGTTCAAG | 15           | 86           | Negative        |
| scaffold48   | 276268 | 242180 | 242194 | CCGTTTTGCCTCAAG | 15           | 86           | Negative        |
| scaffold48   | 276268 | 9364   | 9378   | CCATTCTGGCTCGAG | 15           | 86           | Positive        |
| scaffold286  | 196863 | 31283  | 31297  | ACATTTTGGCTCGAG | 15           | 86           | Negative        |
| scaffold286  | 196863 | 171104 | 171118 | CCGTTTTAGCTCAAG | 15           | 86           | Negative        |
| scaffold286  | 196863 | 28762  | 28776  | ACATTTTGGCGCAAG | 15           | 86           | Negative        |
| scaffold297  | 150960 | 150412 | 150426 | CCAATTTGGCGCAAG | 15           | 86           | Negative        |
| scaffold297  | 150960 | 126026 | 126040 | CCATTCTGACTCAAG | 15           | 86           | Negative        |
| scaffold309  | 124822 | 124727 | 124741 | CCTTTTTGGCTCCAG | 15           | 86           | Negative        |
| scaffold381  | 76577  | 61475  | 61489  | CCATTTTGGATGAAG | 15           | 86           | Positive        |
| scaffold1289 | 45660  | 35483  | 35497  | CCATTTTACTCAAG  | 15           | 86           | Negative        |
| scaffold1358 | 40547  | 27947  | 27961  | CCGCTTTGGCTCAAG | 15           | 86           | Positive        |

|              |        |        |        |                  |    |    |          |
|--------------|--------|--------|--------|------------------|----|----|----------|
| scaffold1358 | 40547  | 33550  | 33564  | CCGCTTTGGCTCAAG  | 15 | 86 | Positive |
| scaffold61   | 406243 | 206523 | 206537 | CCAGGTAGGCTCAAG  | 15 | 80 | Positive |
| scaffold61   | 406243 | 301054 | 301068 | CCTGTTTGGCTGAAG  | 15 | 80 | Negative |
| scaffold61   | 406243 | 118867 | 118881 | CCTTCTTGGGTCAAG  | 15 | 80 | Positive |
| scaffold61   | 406243 | 149440 | 149454 | GCTTTTTGGCACAAAG | 15 | 80 | Negative |
| scaffold61   | 406243 | 79206  | 79220  | CCATTTTGGCACCCG  | 15 | 80 | Negative |
| scaffold61   | 406243 | 370658 | 370672 | CCATGTTGGCCCAA   | 15 | 80 | Negative |
| scaffold61   | 406243 | 102710 | 102724 | CCATTTTGGCACCCAC | 15 | 80 | Positive |
| scaffold61   | 406243 | 383212 | 383226 | CCATGTTGGCGCACG  | 15 | 80 | Negative |
| scaffold61   | 406243 | 392255 | 392269 | CCATGTTGGCGCACG  | 15 | 80 | Negative |
| scaffold17   | 333242 | 59946  | 59960  | CCATTTGCGCTGAAG  | 15 | 80 | Positive |
| scaffold37   | 324791 | 30131  | 30145  | GCATTTTCGGCTCAAT | 15 | 80 | Positive |
| scaffold37   | 324791 | 145129 | 145143 | CCTTTTTGGCGCAAC  | 15 | 80 | Negative |
| scaffold180  | 286137 | 7591   | 7605   | CCATGTTAGCACAAAG | 15 | 80 | Positive |
| scaffold180  | 286137 | 91640  | 91654  | CCATTGTGGTTTAAG  | 15 | 80 | Negative |
| scaffold48   | 276268 | 217604 | 217618 | ACATTTTGGCTTCAG  | 15 | 80 | Negative |
| scaffold48   | 276268 | 83004  | 83018  | CCATTTTAGCACCCAG | 15 | 80 | Negative |
| scaffold48   | 276268 | 211413 | 211427 | CCATCTTCGCTCACG  | 15 | 80 | Negative |
| scaffold68   | 248039 | 32078  | 32092  | CCAACTTGCCTCAAG  | 15 | 80 | Negative |
| scaffold68   | 248039 | 92228  | 92242  | CCGTTCTGGCTCCAG  | 15 | 80 | Negative |
| scaffold68   | 248039 | 34517  | 34531  | CCAACTTGCCTCAAG  | 15 | 80 | Negative |
| scaffold68   | 248039 | 160746 | 160760 | CCTTTTTGGCTAATG  | 15 | 80 | Positive |
| scaffold68   | 248039 | 2872   | 2886   | CCAATTAGGCTCCAG  | 15 | 80 | Negative |
| scaffold544  | 230577 | 138324 | 138338 | CCATTTCTGCGCAAG  | 15 | 80 | Negative |
| scaffold544  | 230577 | 123516 | 123530 | CCGTGTTGGCTCAAT  | 15 | 80 | Negative |
| scaffold544  | 230577 | 164342 | 164356 | CATTTTTGTCTCAAG  | 15 | 80 | Negative |
| scaffold544  | 230577 | 9762   | 9776   | CCAAGTTGCCTCAAG  | 15 | 80 | Positive |
| scaffold544  | 230577 | 71672  | 71686  | GCATGTTGGCACAAAG | 15 | 80 | Negative |
| scaffold283  | 211282 | 137409 | 137423 | CCATCTTGGCTTGAG  | 15 | 80 | Negative |
| scaffold283  | 211282 | 54892  | 54906  | ACGTGTTGGCTCAAG  | 15 | 80 | Positive |
| scaffold283  | 211282 | 202306 | 202320 | CGATTTTCGGCTCGAG | 15 | 80 | Positive |
| scaffold286  | 196863 | 76855  | 76869  | CCATTTTGGCCCAAG  | 15 | 80 | Positive |
| scaffold286  | 196863 | 58975  | 58989  | CTTTTTTGGCTCAGG  | 15 | 80 | Negative |
| scaffold94   | 168647 | 100137 | 100151 | CCATTTTGGCTGCGG  | 15 | 80 | Negative |
| scaffold94   | 168647 | 54972  | 54986  | CCATTCTGGGTCAA   | 15 | 80 | Positive |
| scaffold297  | 150960 | 48649  | 48663  | CCATTTTGGCCTATG  | 15 | 80 | Negative |
| scaffold297  | 150960 | 134185 | 134199 | CGATTATGGCTCAAC  | 15 | 80 | Positive |
| scaffold233  | 133269 | 11202  | 11216  | CGATTTTGGTTGAAG  | 15 | 80 | Negative |
| scaffold233  | 133269 | 23344  | 23358  | CCATTCTTGCTCAAC  | 15 | 80 | Negative |
| scaffold309  | 124822 | 110851 | 110865 | CCCTTTTGGTTCACG  | 15 | 80 | Negative |
| scaffold132  | 124252 | 97975  | 97989  | CTTCTTTGGCTCAAG  | 15 | 80 | Negative |
| scaffold132  | 124252 | 78188  | 78202  | CCACTTTGGCTCGGG  | 15 | 80 | Negative |
| scaffold811  | 107907 | 92463  | 92477  | CCACTTTGGCGCGAG  | 15 | 80 | Negative |
| scaffold307  | 88209  | 84052  | 84066  | CCATTTTTCGCGCAGG | 15 | 80 | Positive |
| scaffold820  | 86658  | 63136  | 63150  | CCAGTTGGGGTCAAG  | 15 | 80 | Negative |
| scaffold820  | 86658  | 56178  | 56192  | CCATTTTTCGCGTAAG | 15 | 80 | Negative |
| scaffold574  | 85034  | 2120   | 2134   | CCATTTTGGGTAGAG  | 15 | 80 | Negative |
| scaffold574  | 85034  | 6166   | 6180   | CCCTTTTTCGCTCCAG | 15 | 80 | Negative |
| scaffold381  | 76577  | 52339  | 52353  | CCATTTTAGCTTCAG  | 15 | 80 | Negative |
| scaffold1189 | 72863  | 23558  | 23572  | CCATTTCTGGTCAAG  | 15 | 80 | Positive |

|              |        |        |        |                  |    |    |          |
|--------------|--------|--------|--------|------------------|----|----|----------|
| scaffold1189 | 72863  | 24308  | 24322  | CCCTTTTGGCGAAAG  | 15 | 80 | Negative |
| scaffold1385 | 64388  | 31917  | 31931  | GCATTGTGGCTGAAG  | 15 | 80 | Negative |
| scaffold1205 | 59972  | 11331  | 11345  | CCATTTTGGCCCACT  | 15 | 80 | Positive |
| scaffold1205 | 59972  | 11493  | 11507  | CCATTTTGGCCCACT  | 15 | 80 | Positive |
| scaffold912  | 59273  | 57031  | 57045  | CGATTTTGGCGCAGG  | 15 | 80 | Negative |
| scaffold600  | 54455  | 19672  | 19686  | GCATTTTCGGCTCAAC | 15 | 80 | Positive |
| scaffold1308 | 47888  | 14302  | 14316  | CTATCTCGGCTCAAG  | 15 | 80 | Negative |
| scaffold1308 | 47888  | 17972  | 17986  | CTATTTTGGCAGAAG  | 15 | 80 | Positive |
| scaffold1359 | 45323  | 35718  | 35732  | GCCTTTTGCCTCAAG  | 15 | 80 | Positive |
| scaffold1358 | 40547  | 3647   | 3661   | CCCTCGTGGCTCAAG  | 15 | 80 | Positive |
| scaffold1358 | 40547  | 21296  | 21310  | CGATCTTGACTCAAG  | 15 | 80 | Negative |
| scaffold1358 | 40547  | 8167   | 8181   | ACATTTTGGACTCCAG | 15 | 80 | Positive |
| scaffold385  | 40098  | 19780  | 19794  | CCTTCTTGGCTCCAG  | 15 | 80 | Positive |
| scaffold1489 | 38893  | 25236  | 25250  | ATAATTTGGCTCAAG  | 15 | 80 | Positive |
| scaffold1270 | 21076  | 17105  | 17119  | CCCGTTTTCGCTCAAG | 15 | 80 | Negative |
| scaffold3442 | 4912   | 133    | 147    | CGATTTTGGCGCACG  | 15 | 80 | Positive |
| scaffold3442 | 4912   | 15     | 29     | CGATTTTGGCGCACG  | 15 | 80 | Positive |
| scaffold61   | 406243 | 361928 | 361942 | ACCTTGTGGCTAAAG  | 15 | 73 | Positive |
| scaffold61   | 406243 | 123227 | 123241 | CAATTTTGGCCCGAT  | 15 | 73 | Positive |
| scaffold61   | 406243 | 237477 | 237491 | TGATTCTGGTTCAAG  | 15 | 73 | Negative |
| scaffold61   | 406243 | 289708 | 289722 | GCATTTTGGCGGAAC  | 15 | 73 | Negative |
| scaffold61   | 406243 | 301437 | 301451 | ACATTTTGGCTTGGG  | 15 | 73 | Negative |
| scaffold61   | 406243 | 373566 | 373580 | CAATTCCGGCTCAAC  | 15 | 73 | Negative |
| scaffold61   | 406243 | 183349 | 183363 | TCATGTTGAGTCAAG  | 15 | 73 | Negative |
| scaffold61   | 406243 | 399904 | 399918 | GCGTTTTCGGTTCAAG | 15 | 73 | Positive |
| scaffold61   | 406243 | 226387 | 226401 | TCATCTTCGCTTAAG  | 15 | 73 | Negative |
| scaffold61   | 406243 | 391051 | 391065 | AGAATTTGGCTGAAG  | 15 | 73 | Negative |
| scaffold61   | 406243 | 223285 | 223299 | TCATCTTCGCTGAAG  | 15 | 73 | Negative |
| scaffold61   | 406243 | 3157   | 3171   | GCGATCTGGCTCAAG  | 15 | 73 | Positive |
| scaffold61   | 406243 | 110202 | 110216 | CTATTTTGGTTCATT  | 15 | 73 | Positive |
| scaffold61   | 406243 | 257704 | 257718 | TCATTTTGGTTTAAT  | 15 | 73 | Negative |
| scaffold61   | 406243 | 366538 | 366552 | CCATTTTATCTCAGT  | 15 | 73 | Positive |
| scaffold61   | 406243 | 354968 | 354982 | CGATTTTGGATCAGT  | 15 | 73 | Negative |
| scaffold61   | 406243 | 97166  | 97180  | CCCGTTCTGCTCAAG  | 15 | 73 | Positive |
| scaffold61   | 406243 | 174871 | 174885 | CCATTTTGTCCAGG   | 15 | 73 | Negative |
| scaffold61   | 406243 | 183828 | 183842 | CCACTTCTGCTCAAT  | 15 | 73 | Positive |
| scaffold61   | 406243 | 111303 | 111317 | CCATTTTGGCTTCTTG | 15 | 73 | Negative |
| scaffold61   | 406243 | 268850 | 268864 | CCACTTTGGTTCTCG  | 15 | 73 | Positive |
| scaffold61   | 406243 | 40165  | 40179  | CCACCTTGGTTCAAT  | 15 | 73 | Negative |
| scaffold61   | 406243 | 125121 | 125135 | CCATTTTGGACACCGG | 15 | 73 | Negative |
| scaffold61   | 406243 | 225000 | 225014 | CCCTTCTGGCGGAAG  | 15 | 73 | Negative |
| scaffold61   | 406243 | 72488  | 72502  | CCATTTGGACGAAAG  | 15 | 73 | Negative |
| scaffold61   | 406243 | 218068 | 218082 | CCAGTTCGGCACCAG  | 15 | 73 | Positive |
| scaffold61   | 406243 | 222746 | 222760 | CCATTCTAGCTCTTG  | 15 | 73 | Negative |
| scaffold61   | 406243 | 292158 | 292172 | CCATTTCGGACTCAA  | 15 | 73 | Positive |
| scaffold61   | 406243 | 337936 | 337950 | CCATTATTGAACAAG  | 15 | 73 | Negative |
| scaffold61   | 406243 | 182664 | 182678 | CCATTATAGCCCGAG  | 15 | 73 | Negative |
| scaffold61   | 406243 | 141812 | 141826 | CCATCTTGTCTTCAG  | 15 | 73 | Positive |
| scaffold61   | 406243 | 212412 | 212426 | ACAAATTGGCTCGAG  | 15 | 73 | Positive |
| scaffold61   | 406243 | 165429 | 165443 | CCAGAATGGCGCAAG  | 15 | 73 | Negative |

|            |        |        |        |                 |    |    |          |
|------------|--------|--------|--------|-----------------|----|----|----------|
| scaffold61 | 406243 | 35771  | 35785  | CCATCATTGTTCAAG | 15 | 73 | Positive |
| scaffold61 | 406243 | 383586 | 383600 | CGATTTTGCCACCAN | 15 | 73 | Positive |
| scaffold61 | 406243 | 392638 | 392652 | CGATTTTGCCACCAG | 15 | 73 | Positive |
| scaffold61 | 406243 | 156027 | 156041 | CGATTTGGGGTCTAG | 15 | 73 | Negative |
| scaffold61 | 406243 | 4244   | 4258   | CCTTTTTGCTCCAAG | 15 | 73 | Negative |
| scaffold61 | 406243 | 33781  | 33795  | CCGTATTGGAGCAAG | 15 | 73 | Positive |
| scaffold61 | 406243 | 398010 | 398024 | CCCATTTGACTCCAG | 15 | 73 | Positive |
| scaffold61 | 406243 | 361972 | 361986 | CCTTTCAGGCACAAG | 15 | 73 | Negative |
| scaffold61 | 406243 | 207247 | 207261 | CCGTTTTTGCGCATG | 15 | 73 | Negative |
| scaffold61 | 406243 | 286794 | 286808 | CCGGTCGGGCTCAAG | 15 | 73 | Negative |
| scaffold61 | 406243 | 304518 | 304532 | CCGTTTTGTCTCATC | 15 | 73 | Positive |
| scaffold61 | 406243 | 5964   | 5978   | CCGTTTTGCCTCCTG | 15 | 73 | Negative |
| scaffold61 | 406243 | 222462 | 222476 | CCACCATGGCTCCAG | 15 | 73 | Negative |
| scaffold61 | 406243 | 338334 | 338348 | CCACCATGCCTCAAG | 15 | 73 | Positive |
| scaffold17 | 333242 | 248994 | 249008 | CCTTTTTCGTTCCAG | 15 | 73 | Positive |
| scaffold17 | 333242 | 258466 | 258480 | CAGTTTTAGCTCCAG | 15 | 73 | Positive |
| scaffold17 | 333242 | 325525 | 325539 | CTGTTTTTGCTCACG | 15 | 73 | Positive |
| scaffold17 | 333242 | 220969 | 220983 | CAGTTTTGGATCAGG | 15 | 73 | Negative |
| scaffold17 | 333242 | 6531   | 6545   | CCTTTTTTGCGAAAG | 15 | 73 | Negative |
| scaffold17 | 333242 | 90238  | 90252  | CCATTTCTGATGAAG | 15 | 73 | Negative |
| scaffold17 | 333242 | 138535 | 138549 | ACATATTAGCGCAAG | 15 | 73 | Positive |
| scaffold17 | 333242 | 258268 | 258282 | CCATCTTGGCTCGTC | 15 | 73 | Positive |
| scaffold17 | 333242 | 52561  | 52575  | CCATTCCGGCTCCAC | 15 | 73 | Negative |
| scaffold17 | 333242 | 317780 | 317794 | CCAGTTCGGATCACG | 15 | 73 | Positive |
| scaffold17 | 333242 | 78321  | 78335  | CCATTCTGTCTCGAT | 15 | 73 | Negative |
| scaffold17 | 333242 | 137030 | 137044 | CGGTTTTGGATCATG | 15 | 73 | Positive |
| scaffold17 | 333242 | 313481 | 313495 | CCAGTGTGGCGCAGG | 15 | 73 | Negative |
| scaffold17 | 333242 | 85817  | 85831  | CCACCTTGGGTCACG | 15 | 73 | Positive |
| scaffold17 | 333242 | 116643 | 116657 | CCAGTCTGGCCCAAC | 15 | 73 | Negative |
| scaffold17 | 333242 | 327152 | 327166 | CCAGTACGGCACAAG | 15 | 73 | Positive |
| scaffold17 | 333242 | 51344  | 51358  | CCGTTTTGGTTGCAG | 15 | 73 | Negative |
| scaffold17 | 333242 | 205644 | 205658 | CCGTTTTAGAGCAAG | 15 | 73 | Negative |
| scaffold17 | 333242 | 245338 | 245352 | CCATTTTCGCAGCAG | 15 | 73 | Negative |
| scaffold17 | 333242 | 64010  | 64024  | CGATTTGAGCCCAAG | 15 | 73 | Positive |
| scaffold17 | 333242 | 249013 | 249027 | CCATTCTGTTTCGAG | 15 | 73 | Positive |
| scaffold17 | 333242 | 221248 | 221262 | GCAGATTGCCTCAAG | 15 | 73 | Negative |
| scaffold17 | 333242 | 250820 | 250834 | ACCTCTTGCCTCAAG | 15 | 73 | Negative |
| scaffold17 | 333242 | 114047 | 114061 | TGGGTTTGGCTCAAG | 15 | 73 | Positive |
| scaffold17 | 333242 | 239375 | 239389 | GCATCTTGCCTCAAT | 15 | 73 | Negative |
| scaffold17 | 333242 | 150499 | 150513 | TCAGTTTGCCGCAAG | 15 | 73 | Negative |
| scaffold17 | 333242 | 300832 | 300846 | TCATTTAGGCTGCAG | 15 | 73 | Negative |
| scaffold17 | 333242 | 173552 | 173566 | GCGTTTCGGCTGAAG | 15 | 73 | Negative |
| scaffold17 | 333242 | 93877  | 93891  | ACTTTTCGGCTCTAG | 15 | 73 | Negative |
| scaffold17 | 333242 | 116235 | 116249 | TAATTTTGGCCCAAC | 15 | 73 | Negative |
| scaffold17 | 333242 | 79604  | 79618  | GCTTTTGGGCTCACG | 15 | 73 | Negative |
| scaffold17 | 333242 | 49231  | 49245  | TCGTTTTGGTTGAAG | 15 | 73 | Positive |
| scaffold17 | 333242 | 141643 | 141657 | TCATAGTGGCTCACG | 15 | 73 | Positive |
| scaffold37 | 324791 | 127637 | 127651 | ACTTTTTGTCGCAAG | 15 | 73 | Negative |
| scaffold37 | 324791 | 192865 | 192879 | CCAGTTTGCATCTAG | 15 | 73 | Negative |
| scaffold37 | 324791 | 27408  | 27422  | CAATTTTGCGGCAAG | 15 | 73 | Negative |

|             |        |        |        |                  |    |    |          |
|-------------|--------|--------|--------|------------------|----|----|----------|
| scaffold37  | 324791 | 130639 | 130653 | CCACATTTGCTCCAG  | 15 | 73 | Positive |
| scaffold37  | 324791 | 129852 | 129866 | CCATTCTGGACCACG  | 15 | 73 | Negative |
| scaffold37  | 324791 | 298822 | 298836 | GCCTTTTGGCTGCAG  | 15 | 73 | Negative |
| scaffold37  | 324791 | 196273 | 196287 | CGATTTTGCCGGAAG  | 15 | 73 | Negative |
| scaffold37  | 324791 | 120543 | 120557 | CGATTTGGGCATAAG  | 15 | 73 | Negative |
| scaffold37  | 324791 | 205130 | 205144 | CGTTTTTGGCTGAGG  | 15 | 73 | Negative |
| scaffold37  | 324791 | 268616 | 268630 | CCATGGTGGCTGAGG  | 15 | 73 | Negative |
| scaffold37  | 324791 | 256812 | 256826 | CCATTTCGGC GCACT | 15 | 73 | Positive |
| scaffold37  | 324791 | 172851 | 172865 | CCATTCTGTCGCAGG  | 15 | 73 | Positive |
| scaffold37  | 324791 | 266204 | 266218 | CGATTTCCGGATGAAG | 15 | 73 | Negative |
| scaffold37  | 324791 | 233478 | 233492 | CGATTTCCGCCTCTAG | 15 | 73 | Negative |
| scaffold37  | 324791 | 46645  | 46659  | CCCTTTTTGCTCACC  | 15 | 73 | Positive |
| scaffold37  | 324791 | 299216 | 299230 | CCCTTTTCGTCTCAAT | 15 | 73 | Negative |
| scaffold37  | 324791 | 15604  | 15618  | CCGTTTTTGCACGAG  | 15 | 73 | Positive |
| scaffold37  | 324791 | 84594  | 84608  | CCTGTTTGATTCAAG  | 15 | 73 | Positive |
| scaffold37  | 324791 | 33343  | 33357  | CCAATTTGGCGGAAA  | 15 | 73 | Positive |
| scaffold37  | 324791 | 274051 | 274065 | CGACTTTCGCACAAG  | 15 | 73 | Negative |
| scaffold37  | 324791 | 288066 | 288080 | CCGTTTTGGCTCGCT  | 15 | 73 | Positive |
| scaffold37  | 324791 | 59661  | 59675  | CCCTTTTTCTCAAC   | 15 | 73 | Negative |
| scaffold37  | 324791 | 292807 | 292821 | CCTTTTTTGCTCCAA  | 15 | 73 | Negative |
| scaffold37  | 324791 | 280175 | 280189 | CCCTTTGGTCACAAG  | 15 | 73 | Positive |
| scaffold37  | 324791 | 143121 | 143135 | AAATTTTGGCTGATG  | 15 | 73 | Positive |
| scaffold37  | 324791 | 324501 | 324515 | TCATCTTGACTCACG  | 15 | 73 | Positive |
| scaffold37  | 324791 | 92009  | 92023  | GCATTTTGGCGCTTG  | 15 | 73 | Negative |
| scaffold37  | 324791 | 59562  | 59576  | CTTTTTTGGCGCAAC  | 15 | 73 | Positive |
| scaffold37  | 324791 | 248905 | 248919 | CCACTTTGGCACATC  | 15 | 73 | Positive |
| scaffold37  | 324791 | 212974 | 212988 | CCATTTTGGAGCCAT  | 15 | 73 | Positive |
| scaffold37  | 324791 | 115816 | 115830 | CTATTTTCGTCTCTAG | 15 | 73 | Negative |
| scaffold37  | 324791 | 84046  | 84060  | ACGATTCGGCTCAAG  | 15 | 73 | Negative |
| scaffold37  | 324791 | 80186  | 80200  | CCGCTTTGGCTCGAC  | 15 | 73 | Negative |
| scaffold37  | 324791 | 299739 | 299753 | GCTTTGTGGCTGAAG  | 15 | 73 | Positive |
| scaffold37  | 324791 | 297390 | 297404 | AGATTTTGGCGCCAG  | 15 | 73 | Positive |
| scaffold329 | 318215 | 100826 | 100840 | CCATTCTGATTAAAG  | 15 | 73 | Positive |
| scaffold329 | 318215 | 286856 | 286870 | CCATTTTGCCTCCTC  | 15 | 73 | Positive |
| scaffold329 | 318215 | 286149 | 286163 | CCATTTTGCCACCAT  | 15 | 73 | Negative |
| scaffold329 | 318215 | 284929 | 284943 | CGTTTTTCAGCTCAAG | 15 | 73 | Negative |
| scaffold329 | 318215 | 15548  | 15562  | CCATTTTGGACGAG   | 15 | 73 | Negative |
| scaffold329 | 318215 | 20536  | 20550  | CCATTTTGGCCCAG   | 15 | 73 | Positive |
| scaffold329 | 318215 | 173571 | 173585 | CTATTTTGGCGCTTG  | 15 | 73 | Negative |
| scaffold329 | 318215 | 317375 | 317389 | TGAATTTTCGCTCAAG | 15 | 73 | Negative |
| scaffold329 | 318215 | 119049 | 119063 | CCAGTTGGGCTCGAC  | 15 | 73 | Negative |
| scaffold329 | 318215 | 309210 | 309224 | CCAGGTTGGCTGAGG  | 15 | 73 | Negative |
| scaffold329 | 318215 | 69402  | 69416  | CCACTTAGGCACGAG  | 15 | 73 | Negative |
| scaffold329 | 318215 | 175678 | 175692 | CCATTTTGGCCAATG  | 15 | 73 | Negative |
| scaffold329 | 318215 | 142454 | 142468 | CCACTTCCGCTGAAG  | 15 | 73 | Positive |
| scaffold329 | 318215 | 196069 | 196083 | CGATTCTGGTTCAAC  | 15 | 73 | Positive |
| scaffold329 | 318215 | 181552 | 181566 | CCAGTTTGATGCAAG  | 15 | 73 | Negative |
| scaffold329 | 318215 | 285145 | 285159 | CGATCTTGGTTCAAT  | 15 | 73 | Negative |
| scaffold329 | 318215 | 278659 | 278673 | CCCGATAGGCTCAAG  | 15 | 73 | Negative |
| scaffold329 | 318215 | 313695 | 313709 | TCGTTTTCGCCAAG   | 15 | 73 | Positive |

|             |        |        |        |                  |    |    |          |
|-------------|--------|--------|--------|------------------|----|----|----------|
| scaffold329 | 318215 | 55368  | 55382  | CCAATCTGGCGCACG  | 15 | 73 | Positive |
| scaffold329 | 318215 | 74258  | 74272  | CCTTTCAGGCTCCAG  | 15 | 73 | Positive |
| scaffold329 | 318215 | 218401 | 218415 | GCATTTTGATTCCAG  | 15 | 73 | Positive |
| scaffold329 | 318215 | 33327  | 33341  | GCATGTTTGCTCTAG  | 15 | 73 | Positive |
| scaffold329 | 318215 | 32133  | 32147  | CCCTTTTGCTTCACG  | 15 | 73 | Positive |
| scaffold329 | 318215 | 280476 | 280490 | CCCTTTTGTCCCAAC  | 15 | 73 | Positive |
| scaffold329 | 318215 | 141906 | 141920 | CCGTTTTGGAGCAGG  | 15 | 73 | Negative |
| scaffold329 | 318215 | 199056 | 199070 | CGTTTTTGGCGCAAC  | 15 | 73 | Positive |
| scaffold329 | 318215 | 307437 | 307451 | CCCTTTTGGCACATT  | 15 | 73 | Positive |
| scaffold329 | 318215 | 174328 | 174342 | TCATTATGGTGCAAG  | 15 | 73 | Positive |
| scaffold329 | 318215 | 209500 | 209514 | TCACTTTTGCTCGAG  | 15 | 73 | Positive |
| scaffold329 | 318215 | 137838 | 137852 | CCAATTTGGCTGCTG  | 15 | 73 | Negative |
| scaffold329 | 318215 | 172450 | 172464 | CTCTTTTAGCTCCAG  | 15 | 73 | Positive |
| scaffold329 | 318215 | 164358 | 164372 | CCGGTATGACTCAAG  | 15 | 73 | Negative |
| scaffold329 | 318215 | 63883  | 63897  | CAATTTTCGCTGAAT  | 15 | 73 | Negative |
| scaffold329 | 318215 | 92251  | 92265  | CCAATACGGTTCAAG  | 15 | 73 | Negative |
| scaffold329 | 318215 | 203995 | 204009 | GCAATTCGGCTGAAG  | 15 | 73 | Positive |
| scaffold329 | 318215 | 42001  | 42015  | CCTTCTTGGCCCCAG  | 15 | 73 | Negative |
| scaffold329 | 318215 | 21670  | 21684  | CCACGGTGGCGCAAG  | 15 | 73 | Negative |
| scaffold329 | 318215 | 200318 | 200332 | GCAATTCGGCTGAAG  | 15 | 73 | Positive |
| scaffold329 | 318215 | 184848 | 184862 | CGATTTTCGACCCAAG | 15 | 73 | Negative |
| scaffold329 | 318215 | 219120 | 219134 | CCATTTGGAGGCAAG  | 15 | 73 | Negative |
| scaffold329 | 318215 | 63605  | 63619  | GCATGGTGGCTCGAG  | 15 | 73 | Positive |
| scaffold180 | 286137 | 143134 | 143148 | CCAGTTCGGCTTTAG  | 15 | 73 | Positive |
| scaffold180 | 286137 | 144171 | 144185 | CCCTTTTGGCGCACC  | 15 | 73 | Positive |
| scaffold180 | 286137 | 21103  | 21117  | CCATTCTAGCTCGTG  | 15 | 73 | Positive |
| scaffold180 | 286137 | 30750  | 30764  | AGATTTTGGCACAAA  | 15 | 73 | Positive |
| scaffold180 | 286137 | 34264  | 34278  | TCATTATCGCTCAAC  | 15 | 73 | Negative |
| scaffold180 | 286137 | 79209  | 79223  | CCTCTTCTGCTCAAG  | 15 | 73 | Positive |
| scaffold180 | 286137 | 191225 | 191239 | CCACTTCTGCTCGAG  | 15 | 73 | Positive |
| scaffold180 | 286137 | 51048  | 51062  | CCGTTTTGGCGGAGG  | 15 | 73 | Positive |
| scaffold180 | 286137 | 118387 | 118401 | CAATTTTGTACACAG  | 15 | 73 | Positive |
| scaffold180 | 286137 | 70794  | 70808  | GCATTTTCGCGCACG  | 15 | 73 | Positive |
| scaffold180 | 286137 | 159386 | 159400 | CCGTTTTGTCAGAAG  | 15 | 73 | Positive |
| scaffold180 | 286137 | 202911 | 202925 | CCATTTTCTTTGAAG  | 15 | 73 | Positive |
| scaffold180 | 286137 | 176345 | 176359 | CCAAATTCGATCAAG  | 15 | 73 | Positive |
| scaffold180 | 286137 | 171421 | 171435 | GCGTCTTTGCTCAAG  | 15 | 73 | Negative |
| scaffold180 | 286137 | 159421 | 159435 | CCGTCTTGGCTCGCG  | 15 | 73 | Negative |
| scaffold180 | 286137 | 128438 | 128452 | CCGTTTTTGCGBAAG  | 15 | 73 | Positive |
| scaffold180 | 286137 | 274476 | 274490 | CCCTTTTGGGTCGCG  | 15 | 73 | Positive |
| scaffold180 | 286137 | 13572  | 13586  | CCAGGCTGGCGCAAG  | 15 | 73 | Positive |
| scaffold180 | 286137 | 273783 | 273797 | CCTGTTTTGCTCCAG  | 15 | 73 | Negative |
| scaffold180 | 286137 | 74157  | 74171  | CGATTTTCAGATCAAG | 15 | 73 | Positive |
| scaffold180 | 286137 | 202011 | 202025 | CCATTTAGTCTCCTG  | 15 | 73 | Positive |
| scaffold180 | 286137 | 84411  | 84425  | GCATTTTGTTCGAG   | 15 | 73 | Negative |
| scaffold180 | 286137 | 102869 | 102883 | CCGTTTTTCGGTCGAG | 15 | 73 | Positive |
| scaffold180 | 286137 | 106845 | 106859 | GCATTTTGTCTCACC  | 15 | 73 | Positive |
| scaffold180 | 286137 | 46788  | 46802  | CCATTTTGGCACTTT  | 15 | 73 | Negative |
| scaffold180 | 286137 | 262274 | 262288 | ACATTTTACTCTTG   | 15 | 73 | Positive |
| scaffold180 | 286137 | 216538 | 216552 | TGAGTTCGGCTCAAN  | 15 | 73 | Positive |

|             |        |        |        |                  |    |    |          |
|-------------|--------|--------|--------|------------------|----|----|----------|
| scaffold180 | 286137 | 27808  | 27822  | ACATGTTGGCTAATG  | 15 | 73 | Negative |
| scaffold180 | 286137 | 170749 | 170763 | CCCGCGTGGCTCAAG  | 15 | 73 | Negative |
| scaffold180 | 286137 | 180256 | 180270 | CCACGTAGGCTCACG  | 15 | 73 | Positive |
| scaffold180 | 286137 | 120639 | 120653 | CCATCTTGACTGACG  | 15 | 73 | Positive |
| scaffold180 | 286137 | 105302 | 105316 | CCATAGTTGATCAAG  | 15 | 73 | Negative |
| scaffold180 | 286137 | 225580 | 225594 | ACCTTTTGGCACCAG  | 15 | 73 | Negative |
| scaffold180 | 286137 | 268126 | 268140 | CTATTTTGGCACACA  | 15 | 73 | Positive |
| scaffold180 | 286137 | 2609   | 2623   | CCAGTTTGGGAGAAG  | 15 | 73 | Positive |
| scaffold180 | 286137 | 80155  | 80169  | CCATCTTCGTTCTAG  | 15 | 73 | Negative |
| scaffold180 | 286137 | 76565  | 76579  | TCATTTTCGTTTCGAG | 15 | 73 | Negative |
| scaffold180 | 286137 | 159208 | 159222 | CCGATTTTGC GCAAG | 15 | 73 | Positive |
| scaffold180 | 286137 | 252001 | 252015 | CTACTCTGGCTAAAG  | 15 | 73 | Negative |
| scaffold180 | 286137 | 170694 | 170708 | GTATTATCGCTCAAG  | 15 | 73 | Positive |
| scaffold180 | 286137 | 264084 | 264098 | CCACTTCGGGTCCAG  | 15 | 73 | Negative |
| scaffold180 | 286137 | 78421  | 78435  | CCATGTTGAAGCAAG  | 15 | 73 | Positive |
| scaffold180 | 286137 | 267111 | 267125 | CGTTTTTGCCTCAA   | 15 | 73 | Negative |
| scaffold180 | 286137 | 6540   | 6554   | CCTTTTTGGTTTAGG  | 15 | 73 | Positive |
| scaffold48  | 276268 | 63356  | 63370  | CTATTGTGGCTCTAC  | 15 | 73 | Negative |
| scaffold48  | 276268 | 243918 | 243932 | CCAGTTTGC GTCCAG | 15 | 73 | Positive |
| scaffold48  | 276268 | 148415 | 148429 | CCATGTTGCGCCAAG  | 15 | 73 | Negative |
| scaffold48  | 276268 | 143111 | 143125 | CTAACTTCGCTCAAG  | 15 | 73 | Negative |
| scaffold48  | 276268 | 185508 | 185522 | GCATTCTTGCTGAAG  | 15 | 73 | Positive |
| scaffold48  | 276268 | 243539 | 243553 | CCCTTTCGGTTGAAG  | 15 | 73 | Negative |
| scaffold48  | 276268 | 232930 | 232944 | GCATTTTCGATCAA   | 15 | 73 | Negative |
| scaffold48  | 276268 | 242763 | 242777 | CCACTTGGGCTCTAC  | 15 | 73 | Negative |
| scaffold48  | 276268 | 163751 | 163765 | CGATGTTGGCAGAAG  | 15 | 73 | Positive |
| scaffold48  | 276268 | 66153  | 66167  | CCACTTCTGCTCCAG  | 15 | 73 | Negative |
| scaffold48  | 276268 | 47266  | 47280  | CCTTTTTGACTCTGG  | 15 | 73 | Negative |
| scaffold48  | 276268 | 57187  | 57201  | CCTTTTAGGGTGAAG  | 15 | 73 | Positive |
| scaffold48  | 276268 | 135937 | 135951 | GCTTTTGGGCTCCAG  | 15 | 73 | Positive |
| scaffold48  | 276268 | 249142 | 249156 | CCCGTTTTGCTCACG  | 15 | 73 | Negative |
| scaffold48  | 276268 | 23173  | 23187  | CCTTTTTTGCTCGTG  | 15 | 73 | Positive |
| scaffold48  | 276268 | 163592 | 163606 | TCATTCACGCTCAAG  | 15 | 73 | Negative |
| scaffold48  | 276268 | 210068 | 210082 | CCCTTTTACTGGAG   | 15 | 73 | Negative |
| scaffold48  | 276268 | 94190  | 94204  | CCCTTTTGGCGCCCG  | 15 | 73 | Positive |
| scaffold48  | 276268 | 162864 | 162878 | CCGATTTGGCTGCAG  | 15 | 73 | Positive |
| scaffold48  | 276268 | 146322 | 146336 | CCGTTTGAGCTGAAG  | 15 | 73 | Positive |
| scaffold48  | 276268 | 223125 | 223139 | ACATGTTGCATCAAG  | 15 | 73 | Negative |
| scaffold48  | 276268 | 169579 | 169593 | TCCTTTTGGCTCTAC  | 15 | 73 | Positive |
| scaffold48  | 276268 | 71792  | 71806  | TCGTTTTCGTTCAAG  | 15 | 73 | Negative |
| scaffold48  | 276268 | 179678 | 179692 | CCAGTTGGCCGCAAG  | 15 | 73 | Negative |
| scaffold48  | 276268 | 185584 | 185598 | TCGTTTTCGCTCACG  | 15 | 73 | Negative |
| scaffold48  | 276268 | 159600 | 159614 | CCATTCTCGGTCATG  | 15 | 73 | Positive |
| scaffold48  | 276268 | 167042 | 167056 | CGATTTGTGCACAAG  | 15 | 73 | Positive |
| scaffold48  | 276268 | 38040  | 38054  | TCATTTTGCATCAAC  | 15 | 73 | Negative |
| scaffold48  | 276268 | 143670 | 143684 | CACTTTTGGCGAAAG  | 15 | 73 | Negative |
| scaffold48  | 276268 | 178852 | 178866 | CCATTTTGGATGGAC  | 15 | 73 | Negative |
| scaffold48  | 276268 | 165539 | 165553 | CCATTTTGGAGGAGG  | 15 | 73 | Positive |
| scaffold48  | 276268 | 268574 | 268588 | CGATTGCCGCTCAAG  | 15 | 73 | Negative |
| scaffold48  | 276268 | 125222 | 125236 | CGATTCTGCGTCAAG  | 15 | 73 | Negative |



|             |        |        |        |                  |    |    |          |
|-------------|--------|--------|--------|------------------|----|----|----------|
| scaffold48  | 276268 | 100386 | 100400 | CCATTTCTGCTTCAG  | 15 | 73 | Negative |
| scaffold48  | 276268 | 144330 | 144344 | TCCTTTTGGTTCTAG  | 15 | 73 | Positive |
| scaffold48  | 276268 | 79658  | 79672  | CCATTTTCGTGCACG  | 15 | 73 | Positive |
| scaffold68  | 248039 | 164141 | 164155 | ACATTTTCGCTCTCG  | 15 | 73 | Positive |
| scaffold68  | 248039 | 115948 | 115962 | ACATTGTGGTTCAAA  | 15 | 73 | Positive |
| scaffold68  | 248039 | 210325 | 210339 | CCATTTTAGCGCTTG  | 15 | 73 | Negative |
| scaffold68  | 248039 | 86336  | 86350  | CCCTTCAGGCTCATG  | 15 | 73 | Positive |
| scaffold68  | 248039 | 112484 | 112498 | CCATGTGGGGTCAAC  | 15 | 73 | Positive |
| scaffold68  | 248039 | 225580 | 225594 | CCATTTTGGCTCTTC  | 15 | 73 | Positive |
| scaffold68  | 248039 | 829    | 843    | CCATTATGGCTTGAC  | 15 | 73 | Negative |
| scaffold68  | 248039 | 94302  | 94316  | CGATTTTGGCTAAGC  | 15 | 73 | Negative |
| scaffold68  | 248039 | 204684 | 204698 | CCTTTCAGGCTCCAG  | 15 | 73 | Negative |
| scaffold68  | 248039 | 109179 | 109193 | CCTACTTGGCCCAAG  | 15 | 73 | Positive |
| scaffold68  | 248039 | 29973  | 29987  | CGTTTTTGGTGCAAG  | 15 | 73 | Positive |
| scaffold68  | 248039 | 141031 | 141045 | CCGTTTGAGCGCAAG  | 15 | 73 | Positive |
| scaffold68  | 248039 | 7526   | 7540   | CCATGTCGGCTATAG  | 15 | 73 | Positive |
| scaffold68  | 248039 | 120393 | 120407 | CCGGTTTGGCGCACG  | 15 | 73 | Negative |
| scaffold68  | 248039 | 80846  | 80860  | CCATTTTCGCTCCTC  | 15 | 73 | Positive |
| scaffold68  | 248039 | 134569 | 134583 | CCATTTTGCAGCATG  | 15 | 73 | Positive |
| scaffold68  | 248039 | 142317 | 142331 | CCATTTTGCATCGTG  | 15 | 73 | Negative |
| scaffold68  | 248039 | 183331 | 183345 | CCCCTTTGGCGCCAG  | 15 | 73 | Negative |
| scaffold68  | 248039 | 168918 | 168932 | CCATTTTGTCTGCCG  | 15 | 73 | Positive |
| scaffold68  | 248039 | 49821  | 49835  | CCATTTTACACAAC   | 15 | 73 | Positive |
| scaffold68  | 248039 | 212252 | 212266 | CCATTTGGGCACGGG  | 15 | 73 | Negative |
| scaffold68  | 248039 | 48776  | 48790  | TCATTGTGGCCCAGG  | 15 | 73 | Negative |
| scaffold68  | 248039 | 226318 | 226332 | ACTTTTCTGCTCAAG  | 15 | 73 | Negative |
| scaffold68  | 248039 | 193175 | 193189 | TTACTTTGGCTCGAG  | 15 | 73 | Negative |
| scaffold68  | 248039 | 16702  | 16716  | TGTTTTTAGCTCAAG  | 15 | 73 | Negative |
| scaffold68  | 248039 | 216836 | 216850 | TGATTTTCGCCTCAAG | 15 | 73 | Negative |
| scaffold68  | 248039 | 98075  | 98089  | CAATTCTTGCTCCAG  | 15 | 73 | Negative |
| scaffold68  | 248039 | 220008 | 220022 | TCTTTTTGGCTCGCG  | 15 | 73 | Positive |
| scaffold68  | 248039 | 169589 | 169603 | TCATTTTGGCGAACG  | 15 | 73 | Positive |
| scaffold68  | 248039 | 61602  | 61616  | TCATTTTGGATGATG  | 15 | 73 | Positive |
| scaffold68  | 248039 | 155532 | 155546 | CCATCTTTGTTGAAG  | 15 | 73 | Positive |
| scaffold68  | 248039 | 190853 | 190867 | CTATTTTGGCTCCAT  | 15 | 73 | Positive |
| scaffold68  | 248039 | 13875  | 13889  | CTTTTTTGGGTGAAG  | 15 | 73 | Negative |
| scaffold68  | 248039 | 219588 | 219602 | CCATATTTGCCCAAC  | 15 | 73 | Positive |
| scaffold68  | 248039 | 148266 | 148280 | CCATATTGATTGAAG  | 15 | 73 | Positive |
| scaffold544 | 230577 | 213296 | 213310 | CAATTTTTCGCGCATG | 15 | 73 | Negative |
| scaffold544 | 230577 | 80382  | 80396  | CAATATTCGCACAAG  | 15 | 73 | Positive |
| scaffold544 | 230577 | 46858  | 46872  | CCACTTTTCCTCAAT  | 15 | 73 | Positive |
| scaffold544 | 230577 | 222873 | 222887 | CCAATTTTGGCTTCAG | 15 | 73 | Positive |
| scaffold544 | 230577 | 172686 | 172700 | ACTTTTTGGCGCCAG  | 15 | 73 | Positive |
| scaffold544 | 230577 | 63689  | 63703  | CCAGTGTGGCACAAT  | 15 | 73 | Positive |
| scaffold544 | 230577 | 211557 | 211571 | CCAGTTTGGCTCGTC  | 15 | 73 | Negative |
| scaffold544 | 230577 | 202826 | 202840 | CCACTCCGGCTCGAG  | 15 | 73 | Positive |
| scaffold544 | 230577 | 94626  | 94640  | CCACTCCGGCTCAAT  | 15 | 73 | Negative |
| scaffold544 | 230577 | 6952   | 6966   | CAATTATGGCGGAAG  | 15 | 73 | Negative |
| scaffold544 | 230577 | 158496 | 158510 | CCACCTCGGCTTAAG  | 15 | 73 | Negative |
| scaffold544 | 230577 | 120265 | 120279 | CCGTCTTGGCTCGAC  | 15 | 73 | Positive |

|             |        |        |        |                  |    |    |          |
|-------------|--------|--------|--------|------------------|----|----|----------|
| scaffold544 | 230577 | 157388 | 157402 | CCATTTTGAATCGCG  | 15 | 73 | Negative |
| scaffold544 | 230577 | 99813  | 99827  | TTCTTTTGCCTCAAG  | 15 | 73 | Negative |
| scaffold544 | 230577 | 199273 | 199287 | CCGTTTTTGCGCAGG  | 15 | 73 | Negative |
| scaffold544 | 230577 | 184940 | 184954 | GCATTTTGTCTCGAA  | 15 | 73 | Positive |
| scaffold544 | 230577 | 69586  | 69600  | GCATTTTGTCTCACC  | 15 | 73 | Positive |
| scaffold544 | 230577 | 211825 | 211839 | CCGTTTTGGGCAAAG  | 15 | 73 | Negative |
| scaffold544 | 230577 | 185895 | 185909 | CCGTTTTGGACCACG  | 15 | 73 | Positive |
| scaffold544 | 230577 | 23690  | 23704  | CCGTTTTGCCCGAAG  | 15 | 73 | Negative |
| scaffold544 | 230577 | 156791 | 156805 | CCATTTTCATACAAG  | 15 | 73 | Positive |
| scaffold544 | 230577 | 13271  | 13285  | CCATTTTGTATCAGC  | 15 | 73 | Negative |
| scaffold544 | 230577 | 68912  | 68926  | TCAGGTTGGATCAAG  | 15 | 73 | Negative |
| scaffold544 | 230577 | 176939 | 176953 | CGATTTTGGATCAGA  | 15 | 73 | Positive |
| scaffold544 | 230577 | 2034   | 2048   | GCATCTTGGCTAAAT  | 15 | 73 | Negative |
| scaffold544 | 230577 | 177235 | 177249 | GCATCCGGGCTCAAG  | 15 | 73 | Positive |
| scaffold544 | 230577 | 139644 | 139658 | GCAGTTTGACTCGAG  | 15 | 73 | Positive |
| scaffold544 | 230577 | 203970 | 203984 | CCGATCTGGCTCACG  | 15 | 73 | Negative |
| scaffold544 | 230577 | 85250  | 85264  | GCAGTTGGGCTCAAA  | 15 | 73 | Positive |
| scaffold544 | 230577 | 183579 | 183593 | GATTTTGTCTCAAG   | 15 | 73 | Negative |
| scaffold544 | 230577 | 26186  | 26200  | GAGTTTGGCTCATG   | 15 | 73 | Negative |
| scaffold544 | 230577 | 106919 | 106933 | CTTTTTGGCTAAGG   | 15 | 73 | Positive |
| scaffold544 | 230577 | 200084 | 200098 | CCTTTTTGCTCCCG   | 15 | 73 | Positive |
| scaffold544 | 230577 | 211821 | 211835 | CCATCTTGCCCAA    | 15 | 73 | Positive |
| scaffold544 | 230577 | 83008  | 83022  | CCATGATGGCTCATC  | 15 | 73 | Negative |
| scaffold544 | 230577 | 165983 | 165997 | CCATGCTGGCGCACG  | 15 | 73 | Negative |
| scaffold544 | 230577 | 60239  | 60253  | CCATGTTGATACAAG  | 15 | 73 | Negative |
| scaffold544 | 230577 | 90612  | 90626  | CGATTATCGCTGAAG  | 15 | 73 | Positive |
| scaffold544 | 230577 | 69010  | 69024  | TCAGGTTGGCTCAGG  | 15 | 73 | Negative |
| scaffold544 | 230577 | 91819  | 91833  | CCTTTTTGGAAGAAG  | 15 | 73 | Positive |
| scaffold544 | 230577 | 215333 | 215347 | CCTTTTGGGTTCAAA  | 15 | 73 | Positive |
| scaffold544 | 230577 | 95593  | 95607  | CGTTTTTGTCTCAGG  | 15 | 73 | Negative |
| scaffold544 | 230577 | 23017  | 23031  | CCATTCTGCGGAAG   | 15 | 73 | Positive |
| scaffold544 | 230577 | 54225  | 54239  | CTATTTGCGTCAAT   | 15 | 73 | Positive |
| scaffold544 | 230577 | 20385  | 20399  | CGCTTTCGGCTCCAG  | 15 | 73 | Negative |
| scaffold544 | 230577 | 85743  | 85757  | TCATATTGGCACAAT  | 15 | 73 | Positive |
| scaffold544 | 230577 | 89697  | 89711  | CGCTTTTGTCTCAGG  | 15 | 73 | Negative |
| scaffold283 | 211282 | 205076 | 205090 | CCATTTTGTCTGCAGG | 15 | 73 | Positive |
| scaffold283 | 211282 | 116503 | 116517 | CCATTTTGTTCGAA   | 15 | 73 | Negative |
| scaffold283 | 211282 | 201697 | 201711 | CCATTTTGGAGCGAC  | 15 | 73 | Negative |
| scaffold283 | 211282 | 12645  | 12659  | ACATTTTCGTTCAAC  | 15 | 73 | Negative |
| scaffold283 | 211282 | 14438  | 14452  | CCATTTTGGGGCGGG  | 15 | 73 | Negative |
| scaffold283 | 211282 | 165017 | 165031 | TCATGTTGGAACAAG  | 15 | 73 | Positive |
| scaffold283 | 211282 | 147264 | 147278 | GAATTATGGCTCAAC  | 15 | 73 | Negative |
| scaffold283 | 211282 | 6638   | 6652   | CTTCTTTAGCTCAAG  | 15 | 73 | Negative |
| scaffold283 | 211282 | 111915 | 111929 | ACATTTTGTGATCATG | 15 | 73 | Negative |
| scaffold283 | 211282 | 95251  | 95265  | CAATGTTGGCGCGAG  | 15 | 73 | Positive |
| scaffold283 | 211282 | 48214  | 48228  | CCATCGTCGCTCCAG  | 15 | 73 | Negative |
| scaffold283 | 211282 | 140596 | 140610 | ACAATTGGGTTCAAG  | 15 | 73 | Positive |
| scaffold283 | 211282 | 48908  | 48922  | GCATTTTCGGCGCGAG | 15 | 73 | Positive |
| scaffold283 | 211282 | 26581  | 26595  | CCATTCTGTCTGACG  | 15 | 73 | Negative |
| scaffold283 | 211282 | 199806 | 199820 | CAATTTTCGGCTCGTG | 15 | 73 | Positive |

|             |        |        |        |                  |    |    |          |
|-------------|--------|--------|--------|------------------|----|----|----------|
| scaffold283 | 211282 | 13755  | 13769  | CGAGTTTCGCTGAAG  | 15 | 73 | Positive |
| scaffold283 | 211282 | 183884 | 183898 | CCGTTTTGGTTCTCG  | 15 | 73 | Negative |
| scaffold283 | 211282 | 31689  | 31703  | CGATGTTTCGCTCATG | 15 | 73 | Negative |
| scaffold283 | 211282 | 167539 | 167553 | CCATGTTGGTACATG  | 15 | 73 | Negative |
| scaffold283 | 211282 | 78817  | 78831  | GCCTTCTGGCTCCAG  | 15 | 73 | Negative |
| scaffold283 | 211282 | 172244 | 172258 | TCATGTTGGATCGAG  | 15 | 73 | Positive |
| scaffold283 | 211282 | 63603  | 63617  | CCATTGTCGCTCGGG  | 15 | 73 | Positive |
| scaffold283 | 211282 | 164909 | 164923 | GCATTTTGGCTCCGT  | 15 | 73 | Positive |
| scaffold283 | 211282 | 122592 | 122606 | AGACTGTGGCTCAAG  | 15 | 73 | Positive |
| scaffold283 | 211282 | 20018  | 20032  | CCCTTTTGTACCAG   | 15 | 73 | Negative |
| scaffold286 | 196863 | 192008 | 192022 | CCAATTCGACTCACG  | 15 | 73 | Negative |
| scaffold286 | 196863 | 190543 | 190557 | CCGTTTTGTGCGCATG | 15 | 73 | Negative |
| scaffold286 | 196863 | 175097 | 175111 | CCCTTTTGCATCCAG  | 15 | 73 | Positive |
| scaffold286 | 196863 | 75043  | 75057  | TCATTCTGGATGAAG  | 15 | 73 | Negative |
| scaffold286 | 196863 | 112717 | 112731 | CCACGTTGGCACTAG  | 15 | 73 | Negative |
| scaffold286 | 196863 | 16176  | 16190  | CCGTTTCGTCTCCAG  | 15 | 73 | Positive |
| scaffold286 | 196863 | 106026 | 106040 | CCATTCTGACCCGAG  | 15 | 73 | Positive |
| scaffold286 | 196863 | 48375  | 48389  | TCCTTCTGGCTCACG  | 15 | 73 | Positive |
| scaffold286 | 196863 | 127942 | 127956 | CCAGTCTGGCCCAAC  | 15 | 73 | Positive |
| scaffold286 | 196863 | 133109 | 133123 | CCATTTTGAATCAA   | 15 | 73 | Positive |
| scaffold286 | 196863 | 24674  | 24688  | CCATTGTGGGCCAAC  | 15 | 73 | Negative |
| scaffold286 | 196863 | 183682 | 183696 | CGATTCTCGCGCAAG  | 15 | 73 | Positive |
| scaffold286 | 196863 | 28081  | 28095  | TCGTGTTGGCTGAAG  | 15 | 73 | Negative |
| scaffold286 | 196863 | 42455  | 42469  | CGATTTTTCGCACAAT | 15 | 73 | Negative |
| scaffold286 | 196863 | 29606  | 29620  | CGCTTTTGCCTCAAT  | 15 | 73 | Positive |
| scaffold286 | 196863 | 181858 | 181872 | CCATGTTGCTTCCAG  | 15 | 73 | Positive |
| scaffold286 | 196863 | 69712  | 69726  | AAATACTGGCTCAAG  | 15 | 73 | Negative |
| scaffold286 | 196863 | 19130  | 19144  | TTATTTTGCCTCATG  | 15 | 73 | Negative |
| scaffold286 | 196863 | 124695 | 124709 | CGATTTTGTGATCCAG | 15 | 73 | Positive |
| scaffold286 | 196863 | 45967  | 45981  | CCATTTTGAATCAGA  | 15 | 73 | Positive |
| scaffold286 | 196863 | 56251  | 56265  | CCATTTTTCGCTAT   | 15 | 73 | Positive |
| scaffold286 | 196863 | 83983  | 83997  | CCTTTTCTGCTCCAG  | 15 | 73 | Negative |
| scaffold286 | 196863 | 101875 | 101889 | CGATTCGGGCTAAAG  | 15 | 73 | Positive |
| scaffold286 | 196863 | 147927 | 147941 | CCATTTTTCGATCTAT | 15 | 73 | Positive |
| scaffold286 | 196863 | 100195 | 100209 | GTCGTTTGGCTCAAG  | 15 | 73 | Negative |
| scaffold286 | 196863 | 169426 | 169440 | CCATTTTGGATTTAC  | 15 | 73 | Positive |
| scaffold286 | 196863 | 158673 | 158687 | CGAGTTTACTCGAG   | 15 | 73 | Positive |
| scaffold286 | 196863 | 9314   | 9328   | CCAGCTTGGTACAAG  | 15 | 73 | Positive |
| scaffold94  | 168647 | 29533  | 29547  | GCGTTCTGGATCAAG  | 15 | 73 | Negative |
| scaffold94  | 168647 | 5205   | 5219   | GCATTCTGGCTCATC  | 15 | 73 | Positive |
| scaffold94  | 168647 | 88124  | 88138  | CTGTTTTGGTTAAG   | 15 | 73 | Negative |
| scaffold94  | 168647 | 112624 | 112638 | CCATGTTGGGTTCCAG | 15 | 73 | Positive |
| scaffold94  | 168647 | 81051  | 81065  | CTATTTTGTCTGATG  | 15 | 73 | Positive |
| scaffold94  | 168647 | 85717  | 85731  | CTACTTTGGTCCAAG  | 15 | 73 | Negative |
| scaffold94  | 168647 | 116182 | 116196 | CCATTTTTCGCGTAG  | 15 | 73 | Negative |
| scaffold94  | 168647 | 66122  | 66136  | CGATTTTTCGCTCCAC | 15 | 73 | Negative |
| scaffold94  | 168647 | 92727  | 92741  | CCATTTTTCGATCGAA | 15 | 73 | Positive |
| scaffold94  | 168647 | 50429  | 50443  | CCATTTTGTCTGCAT  | 15 | 73 | Positive |
| scaffold94  | 168647 | 8798   | 8812   | CCCCTTTGGCTCTGG  | 15 | 73 | Positive |
| scaffold94  | 168647 | 102734 | 102748 | CCCTCTTGGCTACAG  | 15 | 73 | Negative |

|             |        |        |        |                  |    |    |          |
|-------------|--------|--------|--------|------------------|----|----|----------|
| scaffold94  | 168647 | 95391  | 95405  | ACGTTTTTGCTCCAG  | 15 | 73 | Positive |
| scaffold94  | 168647 | 62296  | 62310  | CCATTTTCGGCTCTCT | 15 | 73 | Positive |
| scaffold94  | 168647 | 116705 | 116719 | CCGCCTTGGCTCAGG  | 15 | 73 | Negative |
| scaffold94  | 168647 | 113576 | 113590 | CATTTTTTCTCAAG   | 15 | 73 | Positive |
| scaffold94  | 168647 | 91711  | 91725  | CCATTGTAGCTGACG  | 15 | 73 | Positive |
| scaffold94  | 168647 | 95472  | 95486  | TCGTTTTGGCTCAGC  | 15 | 73 | Positive |
| scaffold94  | 168647 | 116527 | 116541 | CCATCTGGTCCCAAG  | 15 | 73 | Positive |
| scaffold94  | 168647 | 35272  | 35286  | CCATTTTGAAGATG   | 15 | 73 | Positive |
| scaffold297 | 150960 | 67697  | 67711  | CCAGTTTGGCTGCTG  | 15 | 73 | Negative |
| scaffold297 | 150960 | 12464  | 12478  | CGGTTTTTGCTCCAG  | 15 | 73 | Negative |
| scaffold297 | 150960 | 26105  | 26119  | GCATTCTGCATCAAG  | 15 | 73 | Negative |
| scaffold297 | 150960 | 13161  | 13175  | CCAATTTTGCCCCAG  | 15 | 73 | Positive |
| scaffold297 | 150960 | 66575  | 66589  | CCTTTTTCGATCACG  | 15 | 73 | Negative |
| scaffold297 | 150960 | 114894 | 114908 | CTCATTTTCGCTCAAG | 15 | 73 | Negative |
| scaffold297 | 150960 | 146010 | 146024 | CCATAAGGGCTCACG  | 15 | 73 | Positive |
| scaffold297 | 150960 | 26741  | 26755  | CCTTTTCGTCTCATG  | 15 | 73 | Negative |
| scaffold297 | 150960 | 120344 | 120358 | CCATGATGACTCCAG  | 15 | 73 | Positive |
| scaffold297 | 150960 | 142819 | 142833 | ACATTGTAGCTCGAG  | 15 | 73 | Negative |
| scaffold297 | 150960 | 143374 | 143388 | CGATTTTTGCGCACG  | 15 | 73 | Positive |
| scaffold297 | 150960 | 32374  | 32388  | CCCTTTGGGCCAAAG  | 15 | 73 | Positive |
| scaffold297 | 150960 | 35147  | 35161  | CCATTCTGTTTCTAG  | 15 | 73 | Negative |
| scaffold297 | 150960 | 93064  | 93078  | CCACGATGGGTCAAG  | 15 | 73 | Positive |
| scaffold233 | 133269 | 103909 | 103923 | GCGCTTTGGCTCCAG  | 15 | 73 | Negative |
| scaffold233 | 133269 | 26177  | 26191  | CCGTTTTTGCTCGCG  | 15 | 73 | Negative |
| scaffold233 | 133269 | 55627  | 55641  | CTGTTCTGGCACAAAG | 15 | 73 | Negative |
| scaffold233 | 133269 | 27802  | 27816  | CCGGATTGGCTGAAG  | 15 | 73 | Positive |
| scaffold233 | 133269 | 75406  | 75420  | CCATATTGGCTTTCG  | 15 | 73 | Negative |
| scaffold233 | 133269 | 100668 | 100682 | CAATCTGGGATCAAG  | 15 | 73 | Negative |
| scaffold233 | 133269 | 25821  | 25835  | CCTTTTTCGCTCTGG  | 15 | 73 | Negative |
| scaffold233 | 133269 | 81567  | 81581  | ACGCTTTGGCTCCAG  | 15 | 73 | Positive |
| scaffold233 | 133269 | 90956  | 90970  | CGGTTCTGGCACAAAG | 15 | 73 | Positive |
| scaffold233 | 133269 | 123275 | 123289 | GCATTTTCGCTGGAG  | 15 | 73 | Positive |
| scaffold233 | 133269 | 78727  | 78741  | CCATGATGGCACAGG  | 15 | 73 | Positive |
| scaffold233 | 133269 | 49118  | 49132  | GTATTCTGGCTCCAG  | 15 | 73 | Negative |
| scaffold233 | 133269 | 78996  | 79010  | TCGTCTTGACTCAAG  | 15 | 73 | Negative |
| scaffold233 | 133269 | 69246  | 69260  | CCCAATTGGGTCAAG  | 15 | 73 | Negative |
| scaffold233 | 133269 | 38944  | 38958  | CCATTGTCCCTCCAG  | 15 | 73 | Positive |
| scaffold233 | 133269 | 111919 | 111933 | TCATTCTCGCTCCAG  | 15 | 73 | Positive |
| scaffold233 | 133269 | 47270  | 47284  | TCGTATGGGCTCAAG  | 15 | 73 | Positive |
| scaffold233 | 133269 | 66345  | 66359  | ACATTGTGGATCAAC  | 15 | 73 | Positive |
| scaffold233 | 133269 | 73764  | 73778  | GCATGTTGGCTCCAC  | 15 | 73 | Negative |
| scaffold233 | 133269 | 5257   | 5271   | CCATCTTCGCAGAAG  | 15 | 73 | Positive |
| scaffold233 | 133269 | 63769  | 63783  | CGATTTTGCCTCCAC  | 15 | 73 | Positive |
| scaffold309 | 124822 | 72675  | 72689  | ACATTTTGGATGACG  | 15 | 73 | Positive |
| scaffold309 | 124822 | 85651  | 85665  | CGATTTTGCACAGG   | 15 | 73 | Positive |
| scaffold309 | 124822 | 92771  | 92785  | CCATTTGGGCCCCCG  | 15 | 73 | Negative |
| scaffold309 | 124822 | 121907 | 121921 | TCTTTTTGTTCAAG   | 15 | 73 | Negative |
| scaffold309 | 124822 | 106382 | 106396 | CCATCTTCGATAAAG  | 15 | 73 | Negative |
| scaffold309 | 124822 | 65833  | 65847  | AAATTTTCGGATCAAG | 15 | 73 | Positive |
| scaffold309 | 124822 | 9430   | 9444   | CCTCTTTGGCTTATG  | 15 | 73 | Positive |

|             |        |        |        |                  |    |    |          |
|-------------|--------|--------|--------|------------------|----|----|----------|
| scaffold309 | 124822 | 37125  | 37139  | TCATTTTTGCTCCTG  | 15 | 73 | Negative |
| scaffold309 | 124822 | 61927  | 61941  | TCATTTTCACTTAAG  | 15 | 73 | Positive |
| scaffold309 | 124822 | 87000  | 87014  | TCTTTTTGGTTCCAG  | 15 | 73 | Negative |
| scaffold309 | 124822 | 114586 | 114600 | GTTTCTTGGCTCAAG  | 15 | 73 | Negative |
| scaffold309 | 124822 | 90608  | 90622  | CCATTTTGTGTCGTG  | 15 | 73 | Positive |
| scaffold309 | 124822 | 1092   | 1106   | CCTCGTCGGCTCAAG  | 15 | 73 | Negative |
| scaffold309 | 124822 | 68746  | 68760  | TCATTTTGGCGAACG  | 15 | 73 | Positive |
| scaffold309 | 124822 | 45713  | 45727  | CAATTTGGTCTCCAG  | 15 | 73 | Negative |
| scaffold309 | 124822 | 78261  | 78275  | CCGTTTTGGCGCTTG  | 15 | 73 | Negative |
| scaffold309 | 124822 | 78532  | 78546  | CCGTTGGGGCTCGAG  | 15 | 73 | Positive |
| scaffold309 | 124822 | 15216  | 15230  | CAGCTGTGGCTCAAG  | 15 | 73 | Negative |
| scaffold309 | 124822 | 59752  | 59766  | GCATTGTAGCTCATG  | 15 | 73 | Negative |
| scaffold309 | 124822 | 34512  | 34526  | CCGTTTGGCTTCAAG  | 15 | 73 | Negative |
| scaffold309 | 124822 | 120847 | 120861 | ACATTGTGACTCAA   | 15 | 73 | Negative |
| scaffold309 | 124822 | 64030  | 64044  | CCATGTTGGGTGACG  | 15 | 73 | Negative |
| scaffold132 | 124252 | 102880 | 102894 | ACATTTTAGTACAAG  | 15 | 73 | Negative |
| scaffold132 | 124252 | 88680  | 88694  | TCCTTTTTGCTCAGG  | 15 | 73 | Positive |
| scaffold132 | 124252 | 23553  | 23567  | TGATTTTCGGTCAAG  | 15 | 73 | Negative |
| scaffold132 | 124252 | 99852  | 99866  | CCACCTTGGTTCAGG  | 15 | 73 | Positive |
| scaffold132 | 124252 | 32903  | 32917  | GCATTTTGGTGTAAG  | 15 | 73 | Positive |
| scaffold132 | 124252 | 29222  | 29236  | CAACCTTGGCACAAG  | 15 | 73 | Negative |
| scaffold132 | 124252 | 116831 | 116845 | CAATGTTGACACAAG  | 15 | 73 | Negative |
| scaffold132 | 124252 | 64766  | 64780  | CAATCTTGGCTAAAT  | 15 | 73 | Negative |
| scaffold132 | 124252 | 8767   | 8781   | CAATATTCTCTCAAG  | 15 | 73 | Positive |
| scaffold132 | 124252 | 2202   | 2216   | CCATTCTCGGTCAAT  | 15 | 73 | Negative |
| scaffold132 | 124252 | 95311  | 95325  | CCATGCTGGCTCCCG  | 15 | 73 | Negative |
| scaffold132 | 124252 | 46009  | 46023  | GCATGTTGGTCCAAG  | 15 | 73 | Negative |
| scaffold132 | 124252 | 82572  | 82586  | CTGTTTTTGCTGAAG  | 15 | 73 | Positive |
| scaffold132 | 124252 | 65839  | 65853  | CCACTTTCGTTTCGAG | 15 | 73 | Negative |
| scaffold811 | 107907 | 70365  | 70379  | GCTTTTTGGATCAGG  | 15 | 73 | Positive |
| scaffold811 | 107907 | 48058  | 48072  | CGTTTTTGGCGCAGG  | 15 | 73 | Positive |
| scaffold811 | 107907 | 29907  | 29921  | CCATTTTGGCCGAG   | 15 | 73 | Positive |
| scaffold811 | 107907 | 25261  | 25275  | CCCTTTTTCCGCAAG  | 15 | 73 | Positive |
| scaffold811 | 107907 | 44356  | 44370  | CCATTTTGTCTCTGC  | 15 | 73 | Positive |
| scaffold811 | 107907 | 91928  | 91942  | CCGTGGTGGCACAAG  | 15 | 73 | Negative |
| scaffold811 | 107907 | 99108  | 99122  | GCTTTTCTGCTCAAG  | 15 | 73 | Negative |
| scaffold811 | 107907 | 59009  | 59023  | TCCTTGTGCCTCAAG  | 15 | 73 | Negative |
| scaffold811 | 107907 | 35833  | 35847  | CGATTTTTCCTCGAG  | 15 | 73 | Positive |
| scaffold811 | 107907 | 68476  | 68490  | CGAAATTGTCTCAAG  | 15 | 73 | Negative |
| scaffold811 | 107907 | 105186 | 105200 | TCAGTGTGGCTCCAG  | 15 | 73 | Negative |
| scaffold811 | 107907 | 62690  | 62704  | GCAATCTGGATCAAG  | 15 | 73 | Negative |
| scaffold811 | 107907 | 934    | 948    | CCATTTGGTTTCAA   | 15 | 73 | Negative |
| scaffold811 | 107907 | 15444  | 15458  | CCATTTTGTGCTCG   | 15 | 73 | Positive |
| scaffold811 | 107907 | 104416 | 104430 | CCATTTTGGTGCTTG  | 15 | 73 | Positive |
| scaffold811 | 107907 | 62165  | 62179  | ACATTTTACCTCGAG  | 15 | 73 | Negative |
| scaffold811 | 107907 | 1286   | 1300   | CCATTTTGGCGCCCT  | 15 | 73 | Positive |
| scaffold811 | 107907 | 43187  | 43201  | CCATCTTGTGATGAAG | 15 | 73 | Positive |
| scaffold811 | 107907 | 101287 | 101301 | ACTTTTTGCCTCACG  | 15 | 73 | Negative |
| scaffold307 | 88209  | 16668  | 16682  | TCATTTTGGATCAGC  | 15 | 73 | Negative |
| scaffold307 | 88209  | 55004  | 55018  | CCATTTTCGTTCCGG  | 15 | 73 | Positive |

|             |       |       |       |                  |    |    |          |
|-------------|-------|-------|-------|------------------|----|----|----------|
| scaffold307 | 88209 | 71924 | 71938 | CCATGATGGCTCATC  | 15 | 73 | Negative |
| scaffold307 | 88209 | 26219 | 26233 | CCCTTGTGCCTCATG  | 15 | 73 | Positive |
| scaffold307 | 88209 | 7950  | 7964  | CAACATTCGCTCAAG  | 15 | 73 | Negative |
| scaffold307 | 88209 | 46548 | 46562 | CAGTTTTGGGTAAAG  | 15 | 73 | Positive |
| scaffold307 | 88209 | 38289 | 38303 | CGACTTTGGCTGGAG  | 15 | 73 | Positive |
| scaffold307 | 88209 | 36815 | 36829 | CAATTTTTGCTCCAC  | 15 | 73 | Positive |
| scaffold307 | 88209 | 66696 | 66710 | CTATTTTTGCTCTAT  | 15 | 73 | Positive |
| scaffold307 | 88209 | 30521 | 30535 | CCATTTTTGCGGATG  | 15 | 73 | Positive |
| scaffold307 | 88209 | 35566 | 35580 | CGATTATGGCTAATG  | 15 | 73 | Negative |
| scaffold307 | 88209 | 41453 | 41467 | TCAATTTTCGATCAAG | 15 | 73 | Negative |
| scaffold820 | 86658 | 51078 | 51092 | CCACATTGAGTCAAG  | 15 | 73 | Positive |
| scaffold820 | 86658 | 78301 | 78315 | CCATTTATGCTCAGT  | 15 | 73 | Positive |
| scaffold820 | 86658 | 86404 | 86418 | CCGATCTGGTTCAAG  | 15 | 73 | Positive |
| scaffold820 | 86658 | 12469 | 12483 | CCATTGAGGCTCCCG  | 15 | 73 | Negative |
| scaffold820 | 86658 | 57480 | 57494 | CCGTTTTCGCTCGAC  | 15 | 73 | Positive |
| scaffold820 | 86658 | 49911 | 49925 | CCGTTTCTGCTCACG  | 15 | 73 | Negative |
| scaffold820 | 86658 | 72713 | 72727 | ACTTTTTGGCTCAGA  | 15 | 73 | Positive |
| scaffold820 | 86658 | 51822 | 51836 | GGATTTAGGCTGAAG  | 15 | 73 | Positive |
| scaffold820 | 86658 | 76323 | 76337 | CCGTTGTGGCTGATG  | 15 | 73 | Positive |
| scaffold574 | 85034 | 36975 | 36989 | CTTTTTATCTCAAG   | 15 | 73 | Negative |
| scaffold574 | 85034 | 30447 | 30461 | CTGTTTTGGGTCCAG  | 15 | 73 | Negative |
| scaffold574 | 85034 | 41211 | 41225 | CGATTTTTTCTAAAG  | 15 | 73 | Positive |
| scaffold574 | 85034 | 35006 | 35020 | CCACATTGGTTAAAG  | 15 | 73 | Negative |
| scaffold574 | 85034 | 54643 | 54657 | GCATTTTGGCCGATG  | 15 | 73 | Negative |
| scaffold574 | 85034 | 9719  | 9733  | CCATTTTGGCGGCCG  | 15 | 73 | Positive |
| scaffold574 | 85034 | 47590 | 47604 | CCATTCTGCAGCAAG  | 15 | 73 | Positive |
| scaffold574 | 85034 | 11819 | 11833 | CCATTTGGGCGTGAG  | 15 | 73 | Positive |
| scaffold574 | 85034 | 49251 | 49265 | CCACTTTTGCTCCAT  | 15 | 73 | Negative |
| scaffold574 | 85034 | 66947 | 66961 | CAATCTTGGCAGAAG  | 15 | 73 | Positive |
| scaffold956 | 84797 | 47764 | 47778 | TCACTTGGCCTCAAG  | 15 | 73 | Positive |
| scaffold956 | 84797 | 17208 | 17222 | CCATCTCGGCTCTGG  | 15 | 73 | Negative |
| scaffold956 | 84797 | 41254 | 41268 | CAATTTTCGTCTCGAG | 15 | 73 | Positive |
| scaffold956 | 84797 | 34752 | 34766 | CCATCTTGGCCAATG  | 15 | 73 | Positive |
| scaffold956 | 84797 | 28189 | 28203 | CCGATTCGGCTGAAG  | 15 | 73 | Positive |
| scaffold956 | 84797 | 11415 | 11429 | CGATTCAGGATCAAG  | 15 | 73 | Negative |
| scaffold956 | 84797 | 60270 | 60284 | CCATTGTTGCGCAGG  | 15 | 73 | Positive |
| scaffold956 | 84797 | 61901 | 61915 | CCGTTTTGTAGCAAG  | 15 | 73 | Positive |
| scaffold956 | 84797 | 62744 | 62758 | CCGTTTTGTAGCAAG  | 15 | 73 | Positive |
| scaffold956 | 84797 | 51036 | 51050 | CCGTTTTTCTCCAG   | 15 | 73 | Positive |
| scaffold956 | 84797 | 1885  | 1899  | CCGTTTTTGTTC AAC | 15 | 73 | Positive |
| scaffold381 | 76577 | 4342  | 4356  | CCATCCCGGCACAAG  | 15 | 73 | Negative |
| scaffold381 | 76577 | 17232 | 17246 | CGATTTTGCCGCAGG  | 15 | 73 | Positive |
| scaffold381 | 76577 | 27947 | 27961 | TCAATTTGGTTCACG  | 15 | 73 | Positive |
| scaffold381 | 76577 | 26131 | 26145 | CCATCTTCGCACAAC  | 15 | 73 | Positive |
| scaffold381 | 76577 | 37124 | 37138 | ATATTTTGGCTGGAG  | 15 | 73 | Positive |
| scaffold381 | 76577 | 15580 | 15594 | CCCTTATGGCTAGAG  | 15 | 73 | Negative |
| scaffold381 | 76577 | 62039 | 62053 | CCATTTTGTTC AAA  | 15 | 73 | Positive |
| scaffold381 | 76577 | 75340 | 75354 | ACATTCTGGAGCAAG  | 15 | 73 | Negative |
| scaffold381 | 76577 | 43273 | 43287 | CCATATCGACTCACG  | 15 | 73 | Negative |
| scaffold381 | 76577 | 48579 | 48593 | CCATTTTGGCGGTAT  | 15 | 73 | Positive |

|              |       |       |       |                  |    |    |          |
|--------------|-------|-------|-------|------------------|----|----|----------|
| scaffold381  | 76577 | 48751 | 48765 | CCATTCCGGCCCGAG  | 15 | 73 | Positive |
| scaffold381  | 76577 | 23587 | 23601 | CAATTATGGCTCCAC  | 15 | 73 | Positive |
| scaffold381  | 76577 | 32166 | 32180 | CCATTTTGGATGACT  | 15 | 73 | Negative |
| scaffold381  | 76577 | 8926  | 8940  | GCATTTTGCCTCCAA  | 15 | 73 | Negative |
| scaffold381  | 76577 | 29627 | 29641 | CGATTACGGCTCGAG  | 15 | 73 | Negative |
| scaffold381  | 76577 | 6512  | 6526  | CCTTCTTTGCTCATG  | 15 | 73 | Positive |
| scaffold1189 | 72863 | 45089 | 45103 | CCATTTTGGTGCCGG  | 15 | 73 | Negative |
| scaffold1189 | 72863 | 40463 | 40477 | CGACTGTGGCTCCAG  | 15 | 73 | Positive |
| scaffold1189 | 72863 | 56498 | 56512 | TCAATTTGGATCAAC  | 15 | 73 | Positive |
| scaffold1189 | 72863 | 28184 | 28198 | CCGTTTAGGGTCAGG  | 15 | 73 | Positive |
| scaffold1189 | 72863 | 27742 | 27756 | CCGTTTAGGGTCAGG  | 15 | 73 | Positive |
| scaffold1189 | 72863 | 53305 | 53319 | CCGTTCTCGCTCCAG  | 15 | 73 | Positive |
| scaffold1189 | 72863 | 19816 | 19830 | CCCTTTTGTTCAGG   | 15 | 73 | Negative |
| scaffold1189 | 72863 | 24035 | 24049 | GCGTTTTGCCTCATG  | 15 | 73 | Negative |
| scaffold1189 | 72863 | 60867 | 60881 | CCATTTTGCAGAGG   | 15 | 73 | Negative |
| scaffold1189 | 72863 | 25239 | 25253 | GCATTTTGCCTGTAG  | 15 | 73 | Positive |
| scaffold1189 | 72863 | 22479 | 22493 | ACATTTTGTCTCATT  | 15 | 73 | Positive |
| scaffold1189 | 72863 | 22981 | 22995 | CCATTTCTGTACAAG  | 15 | 73 | Negative |
| scaffold1189 | 72863 | 54113 | 54127 | CTCTTGTCGCTCAAG  | 15 | 73 | Positive |
| scaffold1385 | 64388 | 18389 | 18403 | CAATTCTGTGCGCAAG | 15 | 73 | Positive |
| scaffold1385 | 64388 | 37767 | 37781 | CGATTCCGGCTCCAG  | 15 | 73 | Negative |
| scaffold1385 | 64388 | 2852  | 2866  | CAATTTTACTCAAC   | 15 | 73 | Negative |
| scaffold1385 | 64388 | 53420 | 53434 | ATCTTCTGGCTCAAG  | 15 | 73 | Positive |
| scaffold1385 | 64388 | 4762  | 4776  | TGGTTTTGGCTCCAG  | 15 | 73 | Negative |
| scaffold1385 | 64388 | 50488 | 50502 | CCATGCTCGCGCAAG  | 15 | 73 | Negative |
| scaffold1385 | 64388 | 43584 | 43598 | CCATGCTCGCGCAAG  | 15 | 73 | Negative |
| scaffold1385 | 64388 | 30870 | 30884 | ACATTTTGGCGCGCG  | 15 | 73 | Negative |
| scaffold1385 | 64388 | 24257 | 24271 | CCGTTTTGGCGGAGG  | 15 | 73 | Negative |
| scaffold1385 | 64388 | 52390 | 52404 | TCATTTTGGCCCCGG  | 15 | 73 | Negative |
| scaffold1385 | 64388 | 38426 | 38440 | TCATTTTGCCCGAAG  | 15 | 73 | Positive |
| scaffold1205 | 59972 | 53275 | 53289 | CAATTTTGGATGAGG  | 15 | 73 | Negative |
| scaffold1205 | 59972 | 46679 | 46693 | CCATCTTGAAACAAG  | 15 | 73 | Negative |
| scaffold1205 | 59972 | 32401 | 32415 | CTATTGTAGATCAAG  | 15 | 73 | Positive |
| scaffold1205 | 59972 | 33177 | 33191 | CAATTCTGCATCAAG  | 15 | 73 | Negative |
| scaffold1205 | 59972 | 4825  | 4839  | CTATTTTGGCTGTTG  | 15 | 73 | Positive |
| scaffold1205 | 59972 | 21852 | 21866 | CCGTTGTGGCCCAGG  | 15 | 73 | Positive |
| scaffold912  | 59273 | 52725 | 52739 | CAATTTGACTCAAC   | 15 | 73 | Positive |
| scaffold912  | 59273 | 13948 | 13962 | CATTTTGGAAACAAG  | 15 | 73 | Negative |
| scaffold912  | 59273 | 16819 | 16833 | TCTTTTTCGCTCAGG  | 15 | 73 | Negative |
| scaffold912  | 59273 | 51996 | 52010 | AAATTTTGGCTGTAG  | 15 | 73 | Negative |
| scaffold600  | 54455 | 24233 | 24247 | CCATTTTATCGCATG  | 15 | 73 | Positive |
| scaffold600  | 54455 | 5358  | 5372  | CGATTTTGCACAAC   | 15 | 73 | Negative |
| scaffold600  | 54455 | 38363 | 38377 | GCATTTTGCCACAAC  | 15 | 73 | Negative |
| scaffold600  | 54455 | 53769 | 53783 | CGGTTTTGGCGCCAG  | 15 | 73 | Negative |
| scaffold600  | 54455 | 17571 | 17585 | CTTTTGTGGCTCACG  | 15 | 73 | Positive |
| scaffold600  | 54455 | 40855 | 40869 | AGATTCTGGCTAAAG  | 15 | 73 | Positive |
| scaffold1308 | 47888 | 34143 | 34157 | CAGCTTTGGCTGAAG  | 15 | 73 | Negative |
| scaffold1308 | 47888 | 38334 | 38348 | CCGTGTCGTCTCAAG  | 15 | 73 | Negative |
| scaffold1308 | 47888 | 4250  | 4264  | TCACTTTGGCCCACG  | 15 | 73 | Negative |
| scaffold1308 | 47888 | 18903 | 18917 | TCATTTTGGATAAGG  | 15 | 73 | Negative |

|              |       |       |       |                  |    |    |          |
|--------------|-------|-------|-------|------------------|----|----|----------|
| scaffold958  | 45976 | 27838 | 27852 | CAATTTTTGCTGAAT  | 15 | 73 | Negative |
| scaffold958  | 45976 | 42304 | 42318 | CCGTATTGGGTCAAT  | 15 | 73 | Positive |
| scaffold958  | 45976 | 41786 | 41800 | CGATTTTCGGTTCAGG | 15 | 73 | Positive |
| scaffold958  | 45976 | 1731  | 1745  | TCATTTTTCTCTCCAG | 15 | 73 | Negative |
| scaffold958  | 45976 | 2787  | 2801  | GCGTTTTGGCAGAAG  | 15 | 73 | Negative |
| scaffold958  | 45976 | 26652 | 26666 | CCTTTCTCGCTGAAG  | 15 | 73 | Positive |
| scaffold958  | 45976 | 9464  | 9478  | CCATGCTTGTTCAAG  | 15 | 73 | Positive |
| scaffold958  | 45976 | 28985 | 28999 | CCATGCTAGCACAAG  | 15 | 73 | Positive |
| scaffold958  | 45976 | 37348 | 37362 | CCTTTCGAGCTCAAG  | 15 | 73 | Positive |
| scaffold1289 | 45660 | 16206 | 16220 | CCATCTTCGCACAAC  | 15 | 73 | Positive |
| scaffold1289 | 45660 | 38740 | 38754 | CGCTTTCGACTCAAG  | 15 | 73 | Negative |
| scaffold1289 | 45660 | 5357  | 5371  | CCCTTTTCGTTCAAC  | 15 | 73 | Negative |
| scaffold1289 | 45660 | 24186 | 24200 | CGATTTGGGGTCAAC  | 15 | 73 | Positive |
| scaffold1289 | 45660 | 16225 | 16239 | CCATTACGGCTTACG  | 15 | 73 | Positive |
| scaffold1289 | 45660 | 30961 | 30975 | CTAGTTTAGCCCAAG  | 15 | 73 | Negative |
| scaffold1359 | 45323 | 30379 | 30393 | CCGCTTTGGGTGAAG  | 15 | 73 | Positive |
| scaffold1359 | 45323 | 25021 | 25035 | CCATCGCGTCTCAAG  | 15 | 73 | Positive |
| scaffold1398 | 42967 | 12438 | 12452 | TCATTTTTCTCTAG   | 15 | 73 | Negative |
| scaffold1398 | 42967 | 37121 | 37135 | CGGTTGTGGCTCAGG  | 15 | 73 | Negative |
| scaffold1398 | 42967 | 36744 | 36758 | GCGTTTTGGCGCGAG  | 15 | 73 | Positive |
| scaffold1398 | 42967 | 4020  | 4034  | CGATTTTGGCCGACG  | 15 | 73 | Positive |
| scaffold1398 | 42967 | 11434 | 11448 | CCCTTTTCGCTGATG  | 15 | 73 | Negative |
| scaffold1358 | 40547 | 21473 | 21487 | CGACCTTGACTCAAG  | 15 | 73 | Negative |
| scaffold1358 | 40547 | 21566 | 21580 | CGACCTTGACTCAAG  | 15 | 73 | Negative |
| scaffold1358 | 40547 | 21206 | 21220 | CGACCTTGACTCAAG  | 15 | 73 | Negative |
| scaffold1358 | 40547 | 21029 | 21043 | CGACCTTGACTCAAG  | 15 | 73 | Negative |
| scaffold1358 | 40547 | 20755 | 20769 | CGACCTTGACTCAAG  | 15 | 73 | Negative |
| scaffold1358 | 40547 | 20848 | 20862 | CGACCTTGACTCAAG  | 15 | 73 | Negative |
| scaffold1358 | 40547 | 21743 | 21757 | CGACCTTGACTCAAG  | 15 | 73 | Negative |
| scaffold1358 | 40547 | 19297 | 19311 | GCATTTAGCCTCTAG  | 15 | 73 | Negative |
| scaffold1358 | 40547 | 20488 | 20502 | CGACCTTGACTCAAG  | 15 | 73 | Negative |
| scaffold1358 | 40547 | 21157 | 21171 | CGGCTTTGGGTCAAG  | 15 | 73 | Positive |
| scaffold1358 | 40547 | 20311 | 20325 | CGACCTTGACTCAAG  | 15 | 73 | Negative |
| scaffold1358 | 40547 | 20218 | 20232 | CGACCTTGACTCAAG  | 15 | 73 | Negative |
| scaffold1358 | 40547 | 4757  | 4771  | CCGTTTTTGCTCGGG  | 15 | 73 | Negative |
| scaffold1358 | 40547 | 20980 | 20994 | CGGCTTTGGGTCAAG  | 15 | 73 | Positive |
| scaffold1358 | 40547 | 21656 | 21670 | CGACCTTGACTCAAG  | 15 | 73 | Negative |
| scaffold1358 | 40547 | 17386 | 17400 | CCATTTTCTCTGGAG  | 15 | 73 | Negative |
| scaffold1358 | 40547 | 21903 | 21917 | CTATCTTGACGCAAG  | 15 | 73 | Negative |
| scaffold1358 | 40547 | 20169 | 20183 | CGGCTTTGGGTCAAG  | 15 | 73 | Positive |
| scaffold1358 | 40547 | 18231 | 18245 | CCAGTTTCGATCACG  | 15 | 73 | Negative |
| scaffold1358 | 40547 | 20439 | 20453 | CAGCTTTGGGTCAAG  | 15 | 73 | Positive |
| scaffold1358 | 40547 | 13498 | 13512 | CAGCTTTCGCTCAAG  | 15 | 73 | Negative |
| scaffold385  | 40098 | 14012 | 14026 | GCTTCTTGCGCAAG   | 15 | 73 | Positive |
| scaffold385  | 40098 | 27179 | 27193 | ACATTTTTGATCGAG  | 15 | 73 | Positive |
| scaffold385  | 40098 | 39249 | 39263 | TCATTTTGGTTGAAC  | 15 | 73 | Negative |
| scaffold385  | 40098 | 27777 | 27791 | CCATCTTGCTTCAGG  | 15 | 73 | Negative |
| scaffold385  | 40098 | 24503 | 24517 | GCATTGTGGATCACG  | 15 | 73 | Positive |
| scaffold385  | 40098 | 30135 | 30149 | CCACTTTGACCGAAG  | 15 | 73 | Negative |
| scaffold1489 | 38893 | 307   | 321   | CTGTTTTGACTCCAG  | 15 | 73 | Negative |



|              |       |       |       |                  |    |    |          |
|--------------|-------|-------|-------|------------------|----|----|----------|
| scaffold1489 | 38893 | 7848  | 7862  | CCAGTTTGGCTTCCG  | 15 | 73 | Negative |
| scaffold1489 | 38893 | 10094 | 10108 | CCATCACGGCTCAAA  | 15 | 73 | Positive |
| scaffold1489 | 38893 | 37148 | 37162 | CCAATCGGGCTCATG  | 15 | 73 | Negative |
| scaffold1489 | 38893 | 23309 | 23323 | ACATTTTGAATCAAC  | 15 | 73 | Positive |
| scaffold1489 | 38893 | 30158 | 30172 | CAATTTCTGCTCCAG  | 15 | 73 | Negative |
| scaffold1489 | 38893 | 5706  | 5720  | CAATTTTTGCCCGAG  | 15 | 73 | Negative |
| scaffold656  | 38666 | 7444  | 7458  | CGATTTTGTGCGGAAG | 15 | 73 | Positive |
| scaffold656  | 38666 | 30715 | 30729 | CCAGTTTCGATCTAG  | 15 | 73 | Positive |
| scaffold656  | 38666 | 32534 | 32548 | GCATTTTAGCTCCCG  | 15 | 73 | Positive |
| scaffold656  | 38666 | 21068 | 21082 | CCATTTTAGCTGGTG  | 15 | 73 | Positive |
| scaffold549  | 37577 | 336   | 350   | CCATTTTGGTCTAAA  | 15 | 73 | Negative |
| scaffold549  | 37577 | 31620 | 31634 | CTATTTTGGATTTAG  | 15 | 73 | Positive |
| scaffold549  | 37577 | 13097 | 13111 | CCTTCTTGGCTTCAG  | 15 | 73 | Negative |
| scaffold549  | 37577 | 20102 | 20116 | TCATTTTGTCTGTAG  | 15 | 73 | Negative |
| scaffold549  | 37577 | 35287 | 35301 | CAATCTTGGCTAAAT  | 15 | 73 | Positive |
| scaffold549  | 37577 | 28732 | 28746 | TCATTTTTCGCGGAAG | 15 | 73 | Positive |
| scaffold1458 | 27774 | 7593  | 7607  | CGCTTTTGGATGAAG  | 15 | 73 | Positive |
| scaffold1458 | 27774 | 24629 | 24643 | TTATTTTGGCTGACG  | 15 | 73 | Positive |
| scaffold1458 | 27774 | 14029 | 14043 | GCGCTTTGGATCAAG  | 15 | 73 | Positive |
| scaffold1458 | 27774 | 3041  | 3055  | GCATCTTGGCTCGTG  | 15 | 73 | Positive |
| scaffold1320 | 25307 | 6334  | 6348  | CCAGAATGGCTCATG  | 15 | 73 | Positive |
| scaffold1320 | 25307 | 12349 | 12363 | CCAATGTGGCTCCAT  | 15 | 73 | Negative |
| scaffold1270 | 21076 | 20550 | 20564 | GCATTCTGCCTCCAG  | 15 | 73 | Negative |
| scaffold1737 | 13558 | 5807  | 5821  | TCTTTTTGCCTCTAG  | 15 | 73 | Negative |
| scaffold1737 | 13558 | 10208 | 10222 | TCATCTTGCCTCAAC  | 15 | 73 | Negative |
| scaffold1737 | 13558 | 10457 | 10471 | TCGTGGTGGCTCAAG  | 15 | 73 | Positive |
| scaffold1737 | 13558 | 12701 | 12715 | CCAATTTGGCTTTCG  | 15 | 73 | Positive |
| scaffold1737 | 13558 | 8679  | 8693  | CTGTTTTTGTCTCGAG | 15 | 73 | Negative |
| scaffold1737 | 13558 | 8508  | 8522  | GCCTTGTGGCTCAAC  | 15 | 73 | Negative |
| scaffold2289 | 9361  | 4726  | 4740  | CCAGTCTGGGACAAG  | 15 | 73 | Negative |
| scaffold2066 | 8694  | 6169  | 6183  | CCCTTCTGGCTGTAG  | 15 | 73 | Negative |
| scaffold2171 | 8014  | 4144  | 4158  | CCCTTCGGGATCAAG  | 15 | 73 | Negative |
| scaffold2171 | 8014  | 7533  | 7547  | CGAATTATGCTCAAG  | 15 | 73 | Negative |
| scaffold2171 | 8014  | 7463  | 7477  | ACATCTTGACTCTAG  | 15 | 73 | Negative |
| scaffold3000 | 7973  | 7023  | 7037  | CCCTTTCGGCTCTAC  | 15 | 73 | Positive |
| scaffold3000 | 7973  | 6583  | 6597  | AAATGTTGGCTCAAC  | 15 | 73 | Positive |
| scaffold3000 | 7973  | 3907  | 3921  | CCATTTTCGCGCGCG  | 15 | 73 | Negative |
| scaffold2275 | 7391  | 5035  | 5049  | CGGTTTTGGTTCAAT  | 15 | 73 | Negative |
| scaffold3442 | 4912  | 357   | 371   | AGATTTTGGCGCACG  | 15 | 73 | Positive |
| scaffold4061 | 3138  | 1123  | 1137  | GCTCGTTGGCTCAAG  | 15 | 73 | Positive |

**Table S4. Illumina RNAseq reads of *A. ceratii* at 6 and 96 hours during the infection.** (A) Illumina RNAseq reads of *A. ceratii* sp. ex *A. catenella* at 6 and 96 hours during the infection. RNA was extracted following the manufacturer's protocol (Sigma-Aldrich, Steinheim, Germany). RNA quality and quantity check were performed using a NanoDrop ND-100 spectrometer (PeqLab, Erlangen, Germany) and a RNA Nano Chip Assay by the 2100 Bioanalyzer (Agilent Technologies, Böblingen, Germany). Library preparation was done using Illumina's TruSeq RNA sample prep kit (Illumina, San Diego, CA, USA). Libraries were sequenced with a HiSeq2000/2500 (high-throughput mode) in single-read/50 cycle mode. After quality checking the reads were aligned to the *A. ceratii* predicted genes (19,925 genes) by using CLC Genomics Workbench (CLC Bio, Aarhus, Denmark) to obtain the read counts. (B) KOG enrichments of *A. ceratii* predicted genes with intronless (0 intron), low-intron (1-3 introns) and high-intron (>3 introns) (**Bold Italic**: p-value < 0.01). Significant enrichments of the transcripts were tested by calculating the *P* value from a hypergeometric distribution at the background level of the annotation of eukaryotic orthologous groups (KOGs) (<https://genome.jgi.doe.gov/Tutorial/tutorial/kog.html>). KOGs were considered significantly enriched for a given intron number when test statistics gave a *P* value of < 0.01. All RNASeq raw sequencing data have been submitted to NCBI under Bioproject PRJNA274490.

**A**

| Time point | Name         | Sequencing approach | No. of reads | Read length |
|------------|--------------|---------------------|--------------|-------------|
| 6 hours    | Sample_6h_A  | single              | 34,132,086   | 50          |
|            | Sample_6h_B  | single              | 27,920,490   | 50          |
|            | Sample_6h_C  | single              | 29,078,452   | 50          |
| 96 hours   | Sample_96h_A | single              | 33,502,911   | 50          |
|            | Sample_96h_B | single              | 36,356,519   | 50          |
|            | Sample_96h_C | single              | 37,047,919   | 50          |

**B**

| intron counts                                                 | 0            |                    |             | 0-3           |                    |              | >3            |                    |              |
|---------------------------------------------------------------|--------------|--------------------|-------------|---------------|--------------------|--------------|---------------|--------------------|--------------|
|                                                               | Count        | <i>p</i> -value    | %           | Count         | <i>p</i> -value    | %            | Count         | <i>p</i> -value    | %            |
| Cell wall/membrane/envelope biogenesis                        | 16.33        | 0.079633653        | 3.12        | 29.00         | 0.093435737        | 2.66         | 19.33         | 0.055213818        | 2.08         |
| Cell motility                                                 | 1.50         | 0.389494754        | 0.29        | 2.00          | 0.315209359        | 0.18         | 0.00          | 0.255190159        | 0.00         |
| Posttranslational modification, protein turnover, chaperones  | 53.00        | 0.064681456        | 10.13       | 115.50        | 0.041555137        | 10.59        | 88.00         | 0.041136207        | 9.46         |
| Signal transduction mechanisms                                | <b>40.83</b> | <b>1.93014E-07</b> | <b>7.81</b> | 150.00        | 0.041466774        | 13.75        | <b>168.33</b> | <b>4.60454E-06</b> | <b>18.10</b> |
| Intracellular trafficking, secretion, and vesicular transport | 2.50         | 0.293493683        | 0.48        | <b>9.00</b>   | <b>0.008696886</b> | <b>0.82</b>  | 0.00          | 0.00661944         | 0.00         |
| Defense mechanisms                                            | <b>28.50</b> | <b>4.25763E-06</b> | <b>5.45</b> | 33.00         | 0.021217713        | 3.02         | <b>0.00</b>   | <b>5.77826E-13</b> | <b>0.00</b>  |
| Cytoskeleton                                                  | 1.00         | 0.362025869        | 0.19        | 4.50          | 0.220721174        | 0.41         | 1.50          | 0.166697724        | 0.16         |
| RNA processing and modification                               | 0.00         | 0.31608484         | 0.00        | 1.00          | 0.228131368        | 0.09         | 4.00          | 0.056509636        | 0.43         |
| Chromatin structure and dynamics                              | 1.50         | 0.328614056        | 0.29        | 2.50          | 0.178715282        | 0.23         | 4.50          | 0.202707915        | 0.48         |
| Translation, ribosomal structure and biogenesis               | 68.50        | 0.05350139         | 13.10       | <b>157.00</b> | <b>0.001891763</b> | <b>14.39</b> | <b>91.50</b>  | <b>0.000367389</b> | <b>9.84</b>  |
| Transcription                                                 | 16.00        | 0.109138109        | 3.06        | 31.33         | 0.058576815        | 2.87         | 35.50         | 0.046144398        | 3.82         |
| Replication, recombination and repair                         | 44.00        | 0.040346179        | 8.41        | <b>89.33</b>  | <b>0.005604752</b> | <b>8.19</b>  | <b>111.00</b> | <b>0.000583883</b> | <b>11.94</b> |
| Energy production and conversion                              | 31.00        | 0.0655722          | 5.93        | 51.00         | 0.033679218        | 4.67         | 53.33         | 0.057782765        | 5.73         |
| Cell cycle control, cell division, chromosome partitioning    | <b>0.83</b>  | <b>0.009829731</b> | <b>0.16</b> | 8.00          | 0.174292284        | 0.73         | 11.83         | 0.0432854          | 1.27         |
| Amino acid transport and metabolism                           | <b>42.00</b> | <b>0.001087038</b> | <b>8.03</b> | 61.00         | 0.063035812        | 5.59         | <b>33.57</b>  | <b>0.000568139</b> | <b>3.61</b>  |
| Nucleotide transport and metabolism                           | 18.00        | 0.03486392         | 3.44        | 21.33         | 0.031284004        | 1.96         | 23.83         | 0.10524688         | 2.56         |
| Carbohydrate transport and metabolism                         | 31.50        | 0.020896894        | 6.02        | 44.33         | 0.045920928        | 4.06         | 39.95         | 0.06673197         | 4.30         |
| intron counts                                                 | 0            |                    |             | 0-3           |                    |              | >3            |                    |              |
|                                                               | Count        | <i>p</i> -value    | %           | Count         | <i>p</i> -value    | %            | Count         | <i>p</i> -value    | %            |
| Lipid transport and metabolism                                | 14.17        | 0.047791046        | 2.71        | 48.20         | 0.016068817        | 4.42         | 30.00         | 0.06497314         | 3.23         |

|                                                              |       |             |       |              |                    |             |              |                    |             |
|--------------------------------------------------------------|-------|-------------|-------|--------------|--------------------|-------------|--------------|--------------------|-------------|
| Inorganic ion transport and metabolism                       | 20.50 | 0.062218657 | 3.92  | <b>37.00</b> | <b>0.003067602</b> | <b>3.39</b> | <b>59.75</b> | <b>0.000561138</b> | <b>6.42</b> |
| Secondary metabolites biosynthesis, transport and catabolism | 13.17 | 0.042586633 | 2.52  | 21.83        | 0.089222102        | 2.00        | <b>8.50</b>  | <b>0.00536165</b>  | <b>0.91</b> |
| General function prediction only                             | 60.17 | 0.060949467 | 11.50 | 124.15       | 0.047574857        | 11.38       | 110.75       | 0.049142591        | 11.91       |
| Function unknown                                             | 4.00  | 0.073973436 | 0.76  | 18.00        | 0.079998993        | 1.65        | 13.00        | 0.13907704         | 1.40        |

**Table S5. A list of enzymes involved in various metabolic pathways in the *A. ceratii* genome.**

| Enzymes                                                                   | Sequence Names                                                                                                                                                                             | Number of genes |
|---------------------------------------------------------------------------|--------------------------------------------------------------------------------------------------------------------------------------------------------------------------------------------|-----------------|
| <b>Glycolysis</b>                                                         |                                                                                                                                                                                            |                 |
| 1.2.1.12: Glyceraldehyde 3-phosphate dehydrogenase                        | g5105.t1, g5318.t1, g1268.t1, g15719.t1                                                                                                                                                    | 4               |
| 2.7.1.11: 6-phosphofructokinase                                           | g4532.t1, g11905.t1, g13580.t1, g3565.t1, g16188.t1                                                                                                                                        | 5               |
| 2.7.1.2: Glucokinase                                                      | g6467.t1, g9076.t1, g17422.t1, g1820.t1, g6898.t1                                                                                                                                          | 3               |
| 2.7.1.40: Pyruvate kinase                                                 | g4450.t1, g7810.t1, g7811.t1, g13951.t1, g13651.t1, g1953.t1, g3035.t1                                                                                                                     | 7               |
| 2.7.2.3: Phosphoglycerate kinase                                          | g16261.t1, g6745.t1                                                                                                                                                                        | 2               |
| 4.1.2.13: Fructose-bisphosphate aldolase, class I                         | g1265.t1, g3323.t1                                                                                                                                                                         | 2               |
| 4.2.1.11: Enolase                                                         | g4531.t1, g10562.t1                                                                                                                                                                        | 2               |
| 5.3.1.1: Triosephosphate isomerase (TIM)                                  | g2077.t1                                                                                                                                                                                   | 1               |
| 5.3.1.9: Glucose-6-phosphate isomerase                                    | g15821.t1, g3214.t1                                                                                                                                                                        | 2               |
| 5.4.2.1: Phosphoglycerate mutase                                          | g11930.t1, g6352.t1                                                                                                                                                                        | 2               |
| <b>Other enzymes that might be involved in Glycolysis</b>                 |                                                                                                                                                                                            |                 |
| 1.1.1.1/1.1.1.2: alcohol dehydrogenase; aldehyde reductase;               | g17476.t1, g17477.t1, g17478.t1, g8973.t1, g1813.t1, g14245.t1, g3976.t1, g13812.t1, g10793.t1, g4523.t1, g5180.t1, g8245.t1, g4882.t1, g12688.t1, g11613.t1, g2755.t1, g2425.t1, g9223.t1 | 18              |
| 1.2.1.3: aldehyde dehydrogenase (NAD+);                                   | g10929.t1, g15115.t1, g6908.t1, g9892.t1, g405.t1, g7274.t1, g5125.t1, g8354.t1, g4882.t1                                                                                                  | 9               |
| 1.2.4.1: pyruvate dehydrogenase (acetyl-transferring);                    | g4674.t1                                                                                                                                                                                   | 1               |
| 1.8.1.4: dihydrolipoyl dehydrogenase;                                     | g2390.t1, g11161.t1, g7447.t1                                                                                                                                                              | 3               |
| 2.3.1.12: dihydrolipoyllysine-residue acetyltransferase;                  | g14980.t1, g467.t1, g872.t1                                                                                                                                                                | 3               |
| 2.7.1.1: hexokinase                                                       | g1577.t1                                                                                                                                                                                   | 1               |
| 3.1.3.11: fructose-bisphosphatase                                         | g14685.t1, g14101.t1, g8034.t1, g17521.t1, g17520.t1                                                                                                                                       | 5               |
| 3.1.3.13: bisphosphoglycerate phosphatase                                 | g18320.t1                                                                                                                                                                                  | 1               |
| 4.1.1.49: phosphoenolpyruvate carboxykinase                               | g9192.t1, g834.t1, g12237.t1                                                                                                                                                               | 3               |
| 5.1.3.15: glucose-6-phosphate 1-epimerase                                 | g7980.t1, g10797.t1                                                                                                                                                                        | 2               |
| 5.1.3.3: aldose 1-epimerase; mutarotase;                                  | g14385.t1, g5710.t1                                                                                                                                                                        | 2               |
| 5.4.2.2: phosphoglucomutase (alpha-D-glucose-1,6-bisphosphate-dependent); | g3214.t1, g13858.t1                                                                                                                                                                        | 2               |
| 5.4.2.4: bisphosphoglycerate mutase                                       | g18320.t1                                                                                                                                                                                  | 1               |
| 6.2.1.1: acetate---CoA ligase                                             | g11834.t1, g4449.t1, g6814.t1, g7882.t1                                                                                                                                                    | 4               |

| <b>Enzymes</b>                                                                                                                  | <b>Sequence Names</b>                                                                                                                                                                                                                                         | <b>Number of genes</b> |
|---------------------------------------------------------------------------------------------------------------------------------|---------------------------------------------------------------------------------------------------------------------------------------------------------------------------------------------------------------------------------------------------------------|------------------------|
| <b>TCA cycle</b>                                                                                                                |                                                                                                                                                                                                                                                               |                        |
| 6.2.1.4/6.2.1.5: Succinyl-CoA synthetase alpha subunit                                                                          | g7046.t1, g14826.t1, g4515.t1, g7046.t1, g14826.t1, g5924.t1, g4150.t1, g5450.t1, g5451.t1, g5449.t1                                                                                                                                                          | 10                     |
| 1.1.1.37: Malate dehydrogenase                                                                                                  | g17707.t1, g3242.t1, g10767.t1, g17251.t1, g2848.t1, g4769.t1, g2054.t1, g14670.t1, g19916.t1, g4492.t1                                                                                                                                                       | 10                     |
| 1.1.1.42: Isocitrate dehydrogenase                                                                                              | g19124.t1, g629.t1, g7997.t1, g9270.t1                                                                                                                                                                                                                        | 4                      |
| 1.2.4.1/2.3.1.12: Pyruvate dehydrogenase E1 component/ Pyruvate dehydrogenase E2 component (dihydrolipoamide acetyltransferase) | g4674.t1, g14980.t1, g467.t1, g872.t1                                                                                                                                                                                                                         | 4                      |
| 2.3.1.61: 2-oxoglutarate dehydrogenase E2 component (dihydrolipoamide succinyltransferase)                                      | g12217.t1, g13311.t1                                                                                                                                                                                                                                          | 2                      |
| 1.3.5.1: Succinate dehydrogenase (ubiquinone) flavoprotein subunit                                                              | g6898.t1, g2130.t1, g7864.t1, g5319.t1                                                                                                                                                                                                                        | 4                      |
| 2.3.3.1: Citrate synthase                                                                                                       | g16719.t1, g19126.t1, g474.t1, g477.t1, g8175.t1, g12081.t1, g6553.t1, g6197.t1, g5893.t1, g18242.t1                                                                                                                                                          | 10                     |
| 4.2.1.2: Fumarate hydratase, class I                                                                                            | g14808.t1, g13023.t1, g17892.t1, g9027.t1                                                                                                                                                                                                                     | 4                      |
| 4.2.1.3: Aconitate hydratase 1                                                                                                  | g12259.t1, g15984.t1, g15985.t1, g12236.t1, g12237.t1, g12238.t1, g18949.t1, g4475.t1, g9355.t1, g9467.t1, g14059.t1, g10767.t1, g2848.t1, g17251.t1, g18949.t1, g4475.t1, g9355.t1, g9467.t1, g14059.t1, g10767.t1, g2848.t1, g17251.t1, g9467.t1, g14059.t1 | 24                     |
| <b>Other enzymes that might be involved in TCA cycle</b>                                                                        |                                                                                                                                                                                                                                                               |                        |
| 1.1.5.4: malate dehydrogenase (quinone)                                                                                         | g3976.t1, g9723.t1, g4347.t1, g13513.t1, g4347.t1, g13513.t1                                                                                                                                                                                                  | 6                      |
| 1.8.1.4: dihydrolipoyl dehydrogenase                                                                                            | g2390.t1, g11161.t1, g7447.t1                                                                                                                                                                                                                                 | 3                      |
| 2.3.3.1: citrate (Si)-synthase                                                                                                  | g13345.t1                                                                                                                                                                                                                                                     | 1                      |
| 2.3.3.8: ATP citrate synthase                                                                                                   | g5236.t1, g5237.t1, g4150.t1, g5450.t1, g5451.t1, g5449.t1                                                                                                                                                                                                    | 6                      |
| 4.1.1.49: phosphoenolpyruvate carboxykinase (ATP)                                                                               | g9192.t1, g834.t1, g12237.t1                                                                                                                                                                                                                                  | 3                      |
| <b>Oxidative phosphorylation</b>                                                                                                |                                                                                                                                                                                                                                                               |                        |
| 1.6.99.3: NADH dehydrogenase/ NADH dehydrogenase (complex I)                                                                    | g180.t1                                                                                                                                                                                                                                                       | 1                      |
| 1.3.5.1: Succinate dehydrogenase (ubiquinone)                                                                                   | g6898.t1, g2130.t1, g7864.t1,                                                                                                                                                                                                                                 | 4                      |

| <b>Enzymes</b>                                                                                                        | <b>Sequence Names</b>                                                                                                                                                                                                                                                                                                                        | <b>Number of genes</b> |
|-----------------------------------------------------------------------------------------------------------------------|----------------------------------------------------------------------------------------------------------------------------------------------------------------------------------------------------------------------------------------------------------------------------------------------------------------------------------------------|------------------------|
| flavoprotein subunit (complex II)                                                                                     | g5319.t1                                                                                                                                                                                                                                                                                                                                     |                        |
| 1.10.2.2 : Ubiquinol-cytochrome c reductase                                                                           | --                                                                                                                                                                                                                                                                                                                                           | --                     |
| iron-sulfur subunit (complex III)                                                                                     |                                                                                                                                                                                                                                                                                                                                              |                        |
| 1.9.3.1: Cb-type cytochrome c oxidase subunit I (complex IV)                                                          | g15932.t1, g17513.t1, g16451.t1, g3512.t1                                                                                                                                                                                                                                                                                                    | 4                      |
| 3.6.3.6/3.6.3.14: H <sup>+</sup> transporting ATPase/F-type H <sup>+</sup> -transporting ATPase subunit a (complex V) | g1027.t1, g10076.t1, g16058.t1, g16059.t1, g13480.t1, g10622.t1, g2780.t1, g4415.t1, g15533.t1, g15706.t1, g14951.t1, g7935.t1, g5142.t1, g5143.t1, g19157.t1, g7051.t1, g8137.t1, g16352.t1, g17037.t1, g13176.t1, g2225.t1, g2226.t1, g2227.t1, g2228.t1, g3147.t1, g4262.t1, g4504.t1, g10609.t1, g19394.t1, g10527.t1, g1265.t1, g799.t1 | 32                     |
| <b>Other enzymes that might be involved in oxidative phosphorylation</b>                                              |                                                                                                                                                                                                                                                                                                                                              |                        |
| 2.7.4.1: polyphosphate kinase; polyphosphoric acid kinase                                                             | g5951.t1                                                                                                                                                                                                                                                                                                                                     | 1                      |
| 3.6.1.1: inorganic diphosphatase                                                                                      | g10466.t1, g16180.t1, g1721.t1, g4304.t1, g9124.t1, g12655.t1, g8814.t1, g1974.t1, g5266.t1, g2036.t1, g7849.t1, g5341.t1, g8766.t1, g14558.t1, g6231.t1, g11387.t1                                                                                                                                                                          | 16                     |
| D-Lactate: cytochrome c oxidoreductase (D-LDH)                                                                        | g15250.t1, g2635.t1                                                                                                                                                                                                                                                                                                                          | 2                      |
| Galacto-1,4-lactone: cytochrome c oxidoreductase (G-1,4-LDH)                                                          | g1813.t1                                                                                                                                                                                                                                                                                                                                     | 1                      |
| <b>Pentose phosphate pathway</b>                                                                                      |                                                                                                                                                                                                                                                                                                                                              |                        |
| 1.1.1.49 glucose-6-phosphate dehydrogenase                                                                            | --                                                                                                                                                                                                                                                                                                                                           | --                     |
| 3.1.1.31 6-phosphogluconolactonase                                                                                    | g19069.t1, g14685.t1, g14101.t1, g8034.t1, g17521.t1, g17520.t1                                                                                                                                                                                                                                                                              | 6                      |
| 1.1.1.44 phosphogluconate dehydrogenase (NADP <sup>+</sup> -dependent, decarboxylating)                               | g18894.t1, g9293.t1, g10565.t1, g16978.t1, g15112.t1, g14530.t1, g8992.t1                                                                                                                                                                                                                                                                    | 7                      |
| 5.3.1.6 ribose-5-phosphate isomerase                                                                                  | g12957.t1, g565.t1, g11785.t1, g10558.t1                                                                                                                                                                                                                                                                                                     | 4                      |
| 5.1.3.1 ribulose-phosphate 3-epimerase                                                                                | g11989.t1, g16002.t1                                                                                                                                                                                                                                                                                                                         | 2                      |
| 2.2.1.1 transketolase                                                                                                 | g7317.t1, g5062.t1, g7241.t1                                                                                                                                                                                                                                                                                                                 | 3                      |
| 2.2.1.2 transaldolase                                                                                                 | g12919.t1, g15227.t1, g265.t1, g13038.t1                                                                                                                                                                                                                                                                                                     | 4                      |
| <b>Other enzymes that might be involved in pentose phosphate pathway</b>                                              |                                                                                                                                                                                                                                                                                                                                              |                        |
| 1.1.1.44: phosphogluconate dehydrogenase                                                                              | g9530.t1, g10943.t1, g14830.t1, g17477.t1, g17476.t1                                                                                                                                                                                                                                                                                         | 5                      |
| 2.7.1.11: 6-phosphofructokinase                                                                                       | g4532.t1, g11905.t1, g13580.t1, g3565.t1, g16188.t1                                                                                                                                                                                                                                                                                          | 5                      |

| <b>Enzymes</b>                                                            | <b>Sequence Names</b>                                                                                                                                                                                     | <b>Number of genes</b> |
|---------------------------------------------------------------------------|-----------------------------------------------------------------------------------------------------------------------------------------------------------------------------------------------------------|------------------------|
| 2.7.1.15: ribokinase; deoxyribokinase;                                    | g20772.t1, g18924.t1                                                                                                                                                                                      | 2                      |
| 2.7.6.1: ribose-phosphate diphosphokinase                                 | g14804.t1, g18249.t1, g19930.t1, g9663.t1, g5424.t1, g13783.t1, g16201.t1                                                                                                                                 | 7                      |
| 4.1.2.13: fructose-bisphosphate aldolase;                                 | g1265.t1, g3323.t1                                                                                                                                                                                        | 2                      |
| 5.3.1.9: glucose-6-phosphate isomerase;                                   | g15821.t1, g3214.t1                                                                                                                                                                                       | 2                      |
| 5.4.2.2: phosphoglucomutase (alpha-D-glucose-1,6-bisphosphate-dependent); | g3214.t1, g13858.t1                                                                                                                                                                                       | 2                      |
| <b>Purine nucleotide synthesis</b>                                        |                                                                                                                                                                                                           |                        |
| Inosine monophosphate synthesis (precursor)                               |                                                                                                                                                                                                           |                        |
| 2.1.2.2 : GAR transformylase                                              | --                                                                                                                                                                                                        | --                     |
| 2.1.2.3: AICAR transformylase                                             | g8877.t1, g3736.t1                                                                                                                                                                                        | 1                      |
| 2.4.2.14: Amidophosphoribosyltransferase                                  | --                                                                                                                                                                                                        | --                     |
| 2.7.6.1: Ribose-phosphate pyrophosphokinase                               | g14804.t1, g18249.t1, g19930.t1, g9663.t1, g5424.t1, g13783.t1, g16201.t1                                                                                                                                 | 7                      |
| 3.5.4.10: IMP cyclohydrolase                                              | --                                                                                                                                                                                                        | --                     |
| 4.1.1.21: AIR carboxylase                                                 | --                                                                                                                                                                                                        | --                     |
| 4.3.2.2 : Adenylosuccinate lyase                                          | g2152.t1, g17162.t1, g17162.t1                                                                                                                                                                            | 3                      |
| 6.3.2.6 : SAICAR synthetase                                               | g1905.t1, g7103.t1                                                                                                                                                                                        | 2                      |
| 6.3.3.1: AIR synthetase                                                   | --                                                                                                                                                                                                        | --                     |
| 6.3.4.13 : Phosphoribosylamine--glycine ligase                            | --                                                                                                                                                                                                        | --                     |
| 6.3.5.3 : FGAM synthetase                                                 | g136.t1, g16665.t1                                                                                                                                                                                        | 2                      |
| Synthesis of AMP, ADP and ATP                                             |                                                                                                                                                                                                           |                        |
| 6.3.4.4: Adenylosuccinate synthase                                        | g2976.t1, g10842.t1                                                                                                                                                                                       | 2                      |
| 4.3.2.2 : Adenylosuccinate lyase                                          | g2152.t1, g17162.t1, g17162.t1                                                                                                                                                                            | 3                      |
| 2.7.4.3: Adenylate kinase                                                 | g10891.t1, g10926.t1, g11284.t1, g14085.t1, g15913.t1, g15914.t1, g18135.t1, g19077.t1, g3270.t1, g6743.t1, g8645.t1, g18723.t1, g11828.t1, g6398.t1, g7817.t1, g6265.t1, g16279.t1, g15238.t1, g19172.t1 | 19                     |
| 2.7.4.6: Nucleoside-diphosphate kinase                                    | g14086.t1, g7640.t1, g6274.t1, g108.t1, g14746.t1                                                                                                                                                         | 5                      |
| Synthesis of dADP and dATP                                                |                                                                                                                                                                                                           |                        |
| 1.17.4.1: Ribonucleotide reductase, class II                              | g1133.t1, g9496.t1, g10928.t1, g8955.t1, g3413.t1, g3231.t1, g12136.t1, g7603.t1                                                                                                                          | 8                      |
| 2.7.4.6: Nucleoside-diphosphate kinase                                    | g14086.t1, g7640.t1, g6274.t1, g108.t1, g14746.t1                                                                                                                                                         | 5                      |
| Synthesis of GMP, GDP and GTP                                             |                                                                                                                                                                                                           |                        |
| 1.1.1.205: IMP dehydrogenase                                              | g19874.t1, g3209.t1, g5837.t1, g8008.t1, g3593.t1, g18773.t1                                                                                                                                              | 6                      |



| <b>Enzymes</b>                                                                                                                                                                                                                                                                                                                                                             | <b>Sequence Names</b>                                                                                                                                                                                                                                                                                                     | <b>Number of genes</b> |
|----------------------------------------------------------------------------------------------------------------------------------------------------------------------------------------------------------------------------------------------------------------------------------------------------------------------------------------------------------------------------|---------------------------------------------------------------------------------------------------------------------------------------------------------------------------------------------------------------------------------------------------------------------------------------------------------------------------|------------------------|
| 6.3.5.2: GMP synthase (glutamine-hydrolysing)                                                                                                                                                                                                                                                                                                                              | g1284.t1, g7103.t1, g8052.t1, g5566.t1, g12338.t1                                                                                                                                                                                                                                                                         | 5                      |
| 2.7.4.8: Guanylate kinase                                                                                                                                                                                                                                                                                                                                                  | g11449.t1, g1263.t1                                                                                                                                                                                                                                                                                                       | 2                      |
| 2.7.4.6: Nucleoside-diphosphate kinase                                                                                                                                                                                                                                                                                                                                     | g14086.t1, g7640.t1, g6274.t1, g108.t1, g14746.t1                                                                                                                                                                                                                                                                         | 5                      |
| Synthesis of dGDP and dGTP                                                                                                                                                                                                                                                                                                                                                 |                                                                                                                                                                                                                                                                                                                           |                        |
| 1.17.4.1: Ribonucleotide reductase, class II                                                                                                                                                                                                                                                                                                                               | g1133.t1, g9496.t1, g10928.t1, g8955.t1, g3413.t1, g3231.t1, g12136.t1, g7603.t1                                                                                                                                                                                                                                          | 8                      |
| 2.7.4.6: Nucleoside-diphosphate kinase                                                                                                                                                                                                                                                                                                                                     | g14086.t1, g7640.t1, g6274.t1, g108.t1, g14746.t1                                                                                                                                                                                                                                                                         | 5                      |
| Other enzymes that might be involved in purine nucleotide synthesis                                                                                                                                                                                                                                                                                                        |                                                                                                                                                                                                                                                                                                                           |                        |
| 1.17.1.4: xanthine dehydrogenase;                                                                                                                                                                                                                                                                                                                                          | g11271.t1, g8501.t1                                                                                                                                                                                                                                                                                                       | 2                      |
| 1.17.3.2: xanthine oxidase;                                                                                                                                                                                                                                                                                                                                                | g11271.t1, g8501.t1                                                                                                                                                                                                                                                                                                       | 2                      |
| 1.7.1.7: GMP reductase; guanosine 5'-monophosphate reductase                                                                                                                                                                                                                                                                                                               | g10.t1, g7456.t1                                                                                                                                                                                                                                                                                                          | 2                      |
| 1.7.3.3: factor-independent urate hydroxylase                                                                                                                                                                                                                                                                                                                              | g11270.t1                                                                                                                                                                                                                                                                                                                 | 1                      |
| 2.4.2.1: purine-nucleoside phosphorylase                                                                                                                                                                                                                                                                                                                                   | g8354.t1, g6545.t1                                                                                                                                                                                                                                                                                                        | 2                      |
| 2.4.2.7: adenine phosphoribosyltransferase                                                                                                                                                                                                                                                                                                                                 | g2876.t1, g20801.t1, g17488.t1                                                                                                                                                                                                                                                                                            | 3                      |
| 2.4.2.8: hypoxanthine phosphoribosyltransferase                                                                                                                                                                                                                                                                                                                            | g15002.t1, g17096.t1, g2007.t1, g372.t1                                                                                                                                                                                                                                                                                   | 4                      |
| 2.7.1.20: adenosine kinase                                                                                                                                                                                                                                                                                                                                                 | g12038.t1, g3551.t1, g6389.t1                                                                                                                                                                                                                                                                                             | 3                      |
| 2.7.1.25: adenylyl-sulfate kinase                                                                                                                                                                                                                                                                                                                                          | g8333.t1, g2374.t1, g17468.t1                                                                                                                                                                                                                                                                                             | 3                      |
| 2.7.1.40: pyruvate kinase                                                                                                                                                                                                                                                                                                                                                  | g4450.t1, g7810.t1, g7811.t1, g13951.t1, g13651.t1, g1953.t1, g3035.t1                                                                                                                                                                                                                                                    | 7                      |
| 2.7.7.4: sulfate adenylyltransferase                                                                                                                                                                                                                                                                                                                                       | g2374.t1, g13133.t1                                                                                                                                                                                                                                                                                                       | 2                      |
| 2.7.7.6: DNA-directed RNA polymerase; RNA polymerase; RNA nucleotidyltransferase (DNA-directed); RNA polymerase I; RNA polymerase II; RNA polymerase III; C RNA formation factors; deoxyribonucleic acid-dependent ribonucleic acid polymerase; DNA-dependent ribonucleate nucleotidyltransferase; DNA-dependent RNA nucleotidyltransferase; DNA-dependent RNA polymerase; | g14482.t1, g1531.t1, g1532.t1, g4726.t1, g16589.t1, g1891.t1, g9211.t1, g9212.t1, g16532.t1, g10236.t1, g18457.t1, g15754.t1, g19351.t1, g19545.t1, g7252.t1, g1283.t1, g8730.t1, g18584.t1, g2323.t1, g10447.t1, g5153.t1, g3168.t1, g20444.t1, g5828.t1, g15829.t1, g12096.t1, g18256.t1, g9055.t1, g14088.t1, g7800.t1 | 30                     |
| 2.7.7.7: DNA-directed DNA polymerase; DNA polymerase I; DNA polymerase II; DNA polymerase III; DNA polymerase alpha; DNA polymerase beta; DNA polymerase gamma; DNA nucleotidyltransferase (DNA-directed); DNA nucleotidyltransferase (DNA-directed); deoxyribonucleate nucleotidyltransferase; deoxynucleate polymerase; deoxyribonucleic                                 | g12267.t1, g9894.t1, g15977.t1, g854.t1, g3400.t1, g17205.t1, g19366.t1, g5761.t1, g7237.t1, g14931.t1, g5760.t1, g9686.t1, g17850.t1, g11189.t1, g18621.t1, g3464.t1, g4640.t1, g2546.t1, g8974.t1, g9037.t1, g9038.t1, g9056.t1, g2713.t1, g5671.t1,                                                                    | 34                     |

| <b>Enzymes</b>                                                                                                                                                                                                                                                                                                   | <b>Sequence Names</b>                                                                                                                                                                                                                                                                                                                                                                                                                           | <b>Number of genes</b> |
|------------------------------------------------------------------------------------------------------------------------------------------------------------------------------------------------------------------------------------------------------------------------------------------------------------------|-------------------------------------------------------------------------------------------------------------------------------------------------------------------------------------------------------------------------------------------------------------------------------------------------------------------------------------------------------------------------------------------------------------------------------------------------|------------------------|
| acid duplicase; deoxyribonucleic acid polymerase; deoxyribonucleic duplicase; deoxyribonucleic polymerase; deoxyribonucleic polymerase I                                                                                                                                                                         | g4661.t1, g7831.t1, g11609.t1, g6682.t1, g18957.t1, g7922.t1, g9536.t1, g1812.t1, g11075.t1, g16276.t1                                                                                                                                                                                                                                                                                                                                          |                        |
| 2.7.7.8: polyribonucleotide nucleotidyltransferase; polynucleotide phosphorylase;                                                                                                                                                                                                                                | g16455.t1, g7714.t1                                                                                                                                                                                                                                                                                                                                                                                                                             | 2                      |
| 3.1.4.17: 3',5'-cyclic-nucleotide phosphodiesterase; cyclic 3',5'-mononucleotide phosphodiesterase; PDE; cyclic 3',5'-nucleotide phosphodiesterase; cyclic 3',5'-phosphodiesterase; 3',5'-nucleotide phosphodiesterase; 3':5'-cyclic nucleotide 5'-nucleotidohydrolase; 3',5'-cyclonucleotide phosphodiesterase; | g10974.t1, g15075.t1, g18884.t1, g2808.t1, g3208.t1, g9101.t1, g19192.t1, g2756.t1, g9244.t1, g13561.t1, g7175.t1, g844.t1, g19192.t1, g2756.t1, g9244.t1, g874.t1, g844.t1, g810.t1, g9484.t1, g9483.t1, g17640.t1, g10502.t1                                                                                                                                                                                                                  | 22                     |
| 3.1.4.53: 3',5'-cyclic-AMP phosphodiesterase; cAMP-specific phosphodiesterase;                                                                                                                                                                                                                                   | g5868.t1, g2047.t1                                                                                                                                                                                                                                                                                                                                                                                                                              | 2                      |
| 3.2.2.2: inosine nucleosidase; inosinase; inosine-guanosine nucleosidase                                                                                                                                                                                                                                         | g3292.t1                                                                                                                                                                                                                                                                                                                                                                                                                                        | 1                      |
| 3.5.4.10: IMP cyclohydrolase; inosinicase; inosinate cyclohydrolase                                                                                                                                                                                                                                              | g8877.t1, g3736.t1                                                                                                                                                                                                                                                                                                                                                                                                                              | 2                      |
| 3.5.4.3: guanine deaminase; guanase; guanine aminase;                                                                                                                                                                                                                                                            | g3919.t1, g4901.t1                                                                                                                                                                                                                                                                                                                                                                                                                              | 2                      |
| 3.5.4.4: adenosine deaminase; deoxyadenosine deaminase                                                                                                                                                                                                                                                           | g13973.t1, g17512.t1, g15531.t1                                                                                                                                                                                                                                                                                                                                                                                                                 | 3                      |
| 3.5.4.6: AMP deaminase; adenylic acid deaminase; AMP aminase; adenylic deaminase;                                                                                                                                                                                                                                | g13078.t1, g19884.t1, g6019.t1, g5425.t1, g2504.t1, g3274.t1                                                                                                                                                                                                                                                                                                                                                                                    | 6                      |
| 3.6.1.11: exopolyphosphatase;                                                                                                                                                                                                                                                                                    | g10650.t1                                                                                                                                                                                                                                                                                                                                                                                                                                       | 1                      |
| 3.6.1.13: ADP-ribose diphosphatase;                                                                                                                                                                                                                                                                              | g19921.t1, g5405.t1, g13021.t1, g15536.t1                                                                                                                                                                                                                                                                                                                                                                                                       | 4                      |
| 3.6.1.15: nucleoside-triphosphate phosphatase; nucleoside-triphosphatase; nucleoside triphosphate phosphohydrolase; nucleoside-5-triphosphate phosphohydrolase; nucleoside 5-triphosphatase; unspecific diphosphate phosphohydrolase                                                                             | g9812.t1, g1327.t1, g3113.t1, g8960.t1, g15605.t1, g7850.t1, g6705.t1, g471.t1, g14654.t1, g3112.t1, g16627.t1, g13530.t1, g3776.t1, g2002.t1, g2948.t1, g18609.t1, g12851.t1, g2000.t1, g470.t1, g12985.t1, g9528.t1, g13636.t1, g2349.t1, g14780.t1, g15395.t1, g6913.t1, g2593.t1, g15603.t1, g6704.t1, g12848.t1, g4208.t1, g1975.t1, g8144.t1, g9255.t1, g15398.t1, g6856.t1, g15604.t1, g7354.t1, g6078.t1, g3603.t1, g2476.t1, g14451.t1 | 42                     |
| 3.6.1.19: nucleoside-triphosphate diphosphatase;                                                                                                                                                                                                                                                                 | g602.t1, g2594.t1, g593.t1                                                                                                                                                                                                                                                                                                                                                                                                                      | 3                      |
| 3.6.1.29: bis(5'-adenosyl)-triphosphatase;                                                                                                                                                                                                                                                                       | g2586.t1, g4157.t1                                                                                                                                                                                                                                                                                                                                                                                                                              | 2                      |

| Enzymes                                                                                                                                                                                                                                                                                                                                                                                        | Sequence Names                                                                                                                                                                                                                                                                                                                                                                                                                                                                                                                                                                                                                                                                                                                                                                                                                                                                                                                                                                                                                                                                                                                                                                                                                                                                                                                                                                                                                                                                                                                                                             | Number of genes |
|------------------------------------------------------------------------------------------------------------------------------------------------------------------------------------------------------------------------------------------------------------------------------------------------------------------------------------------------------------------------------------------------|----------------------------------------------------------------------------------------------------------------------------------------------------------------------------------------------------------------------------------------------------------------------------------------------------------------------------------------------------------------------------------------------------------------------------------------------------------------------------------------------------------------------------------------------------------------------------------------------------------------------------------------------------------------------------------------------------------------------------------------------------------------------------------------------------------------------------------------------------------------------------------------------------------------------------------------------------------------------------------------------------------------------------------------------------------------------------------------------------------------------------------------------------------------------------------------------------------------------------------------------------------------------------------------------------------------------------------------------------------------------------------------------------------------------------------------------------------------------------------------------------------------------------------------------------------------------------|-----------------|
| dinucleosidetriphosphatase;<br>3.6.1.3: adenosinetriphosphatase;<br>adenylypyrophosphatase; ATP monophosphatase;<br>triphosphatase; ATPase (ambiguous); SV40 T-<br>antigen; adenosine 5'-triphosphatase; ATP<br>hydrolase; complex V (mitochondrial electron<br>transport); (Ca <sup>2+</sup> + Mg <sup>2+</sup> )-ATPase; HCO <sub>3</sub> <sup>-</sup> -<br>ATPase; adenosine triphosphatase | g12016.t1, g19880.t1, g390.t1,<br>g15112.t1, g8145.t1, g1611.t1,<br>g16364.t1, g6390.t1, g9293.t1,<br>g185.t1, g6108.t1, g3614.t1,<br>g13199.t1, g19951.t1, g11723.t1,<br>g5342.t1, g4867.t1, g5707.t1,<br>g522.t1, g2365.t1, g18585.t1,<br>g18611.t1, g4158.t1, g6180.t1,<br>g10651.t1, g13615.t1, g12494.t1,<br>g13528.t1, g3405.t1, g9507.t1,<br>g6232.t1, g14297.t1, g12513.t1,<br>g18627.t1, g4438.t1, g13534.t1,<br>g11070.t1, g2001.t1, g15393.t1,<br>g18610.t1, g16212.t1, g8815.t1,<br>g12176.t1, g15518.t1, g14876.t1,<br>g7064.t1, g2937.t1, g15399.t1,<br>g13531.t1, g15396.t1, g14420.t1,<br>g10652.t1, g2096.t1, g16211.t1,<br>g6233.t1, g4869.t1, g19233.t1,<br>g8195.t1, g468.t1, g18264.t1,<br>g9763.t1, g18103.t1, g6347.t1,<br>g15394.t1, g1977.t1, g15397.t1,<br>g6703.t1, g20698.t1, g469.t1,<br>g4215.t1, g12664.t1, g12178.t1,<br>g13529.t1, g6183.t1, g12850.t1,<br>g15667.t1, g12035.t1, g13405.t1,<br>g3042.t1, g4935.t1, g14522.t1,<br>g18354.t1, g9462.t1, g2707.t1,<br>g9835.t1, g3913.t1, g3492.t1,<br>g639.t1, g1287.t1, g9994.t1,<br>g7419.t1, g12255.t1, g1785.t1,<br>g9071.t1, g18257.t1, g1175.t1,<br>g7935.t1, g5143.t1, g5142.t1,<br>g10141.t1, g2092.t1, g14995.t1,<br>g10340.t1, g15553.t1, g10676.t1,<br>g2743.t1, g12538.t1, g2811.t1,<br>g983.t1, g16137.t1, g7398.t1,<br>g9845.t1, g19466.t1, g9712.t1,<br>g5688.t1, g20053.t1, g5689.t1,<br>g5687.t1, g10677.t1, g2228.t1,<br>g16059.t1, g8137.t1, g16058.t1,<br>g4058.t1, g1174.t1, g4059.t1,<br>g9481.t1, g9482.t1, g5647.t1,<br>g8786.t1, g7952.t1, g11137.t1,<br>g12053.t1 | 133             |

| <b>Enzymes</b>                                                                                                              | <b>Sequence Names</b>                                                                          | <b>Number of genes</b> |
|-----------------------------------------------------------------------------------------------------------------------------|------------------------------------------------------------------------------------------------|------------------------|
| 3.6.1.41: bis(5'-nucleosyl)-tetraphosphatase (symmetrical);                                                                 | g1078.t1                                                                                       | 1                      |
| 3.6.1.5: apyrase; ATP-diphosphatase;                                                                                        | g9835.t1                                                                                       | 1                      |
| 3.6.1.6: nucleoside diphosphate phosphatase;                                                                                | g8837.t1, g9293.t1                                                                             | 2                      |
| 4.6.1.1: adenylate cyclase; adenylylcyclase; adenyl cyclase; 3',5'-cyclic AMP synthetase; ATP diphosphate-lyase (cyclizing) | g10142.t1, g15906.t1, g10333.t1, g14367.t1, g7060.t1, g5488.t1, g14994.t1, g13232.t1, g5558.t1 | 9                      |
| 4.6.1.2: guanylate cyclase; guanylyl cyclase; guanyl cyclase; GTP diphosphate-lyase (cyclizing)                             | g10334.t1, g9027.t1, g17610.t1                                                                 | 3                      |
| 5.4.2.2: phosphoglucomutase (alpha-D-glucose-1,6-bisphosphate-dependent);                                                   | g3214.t1, g13858.t1                                                                            | 2                      |
| 3.1.3.5 5'-nucleotidase; uridine 5'-nucleotidase; 5'-adenylic phosphatase;                                                  | g18957.t1, g7714.t1, g17652.t1, g8859.t1, g4447.t1                                             | 5                      |
| <b>Pyrimidine nucleotide synthesis</b>                                                                                      |                                                                                                |                        |
| Uridine monophosphate synthesis (precursor)                                                                                 |                                                                                                |                        |
| 6.3.5.5: carbamoyl-phosphate synthase                                                                                       | g647.t1, g645.t1, g11082.t1, g14530.t1, g9630.t1, g7317.t1                                     | 6                      |
| 2.1.3.2: aspartate carbamoyltransferase                                                                                     | g11723.t1, g645.t1, g11082.t1, g14530.t1, g9630.t1, g7317.t1, g8083.t1                         | 7                      |
| 3.5.2.3: dihydroorotase                                                                                                     | g14586.t1, g14587.t1, g645.t1, g14302.t1, g11082.t1, g14530.t1, g9630.t1                       | 7                      |
| 1.3.5.2: dihydroorotate dehydrogenase                                                                                       | g6389.t1                                                                                       | 1                      |
| 2.4.2.10: orotate phosphoribosyltransferase                                                                                 | g19813.t1, g19814.t1, g12085.t1, g9000.t1                                                      | 4                      |
| 4.1.1.23: orotidine-5'-monophosphate decarboxylase                                                                          | g12085.t1, g11791.t1                                                                           | 2                      |
| UDP, UTP, CTP and CDP synthesis                                                                                             |                                                                                                |                        |
| 2.7.4.4: nucleoside phosphate kinase                                                                                        | --                                                                                             | --                     |
| 2.7.4.6: nucleoside-diphosphate kinase                                                                                      | g14086.t1, g7640.t1, g6274.t1, g108.t1, g14746.t1                                              | 5                      |
| 6.3.4.2: CTP synthase                                                                                                       | g3467.t1, g136.t1                                                                              | 2                      |
| dCDP, dCTP, dUDP and dUTP synthesis                                                                                         |                                                                                                |                        |
| 1.17.4.1: ribonucleotide reductase, class II                                                                                | g1133.t1, g9496.t1, g10928.t1, g8955.t1, g3413.t1, g3231.t1, g12136.t1, g7603.t1               | 8                      |
| 2.7.4.6: nucleoside-diphosphate kinase                                                                                      | g14086.t1, g7640.t1, g6274.t1, g108.t1, g14746.t1                                              | 5                      |
| dTMP, dTDP and dTTP synthesis                                                                                               |                                                                                                |                        |
| 2.7.4.4 nucleoside phosphate kinase                                                                                         | --                                                                                             | --                     |
| 2.1.1.45: thymidylate synthase                                                                                              | g3876.t1, g10928.t1                                                                            | 2                      |
| 2.7.4.9: dTMP kinase                                                                                                        | g5946.t1, g986.t1, g352.t1, g11606.t1                                                          | 4                      |

| Enzymes                                                                                                                                                                                                                                                                                                                                                                                                                                                                                             | Sequence Names                                                                                                                                                                                                                                                                                                                                                | Number of genes |
|-----------------------------------------------------------------------------------------------------------------------------------------------------------------------------------------------------------------------------------------------------------------------------------------------------------------------------------------------------------------------------------------------------------------------------------------------------------------------------------------------------|---------------------------------------------------------------------------------------------------------------------------------------------------------------------------------------------------------------------------------------------------------------------------------------------------------------------------------------------------------------|-----------------|
| 2.7.4.6: nucleoside-diphosphate kinase                                                                                                                                                                                                                                                                                                                                                                                                                                                              | g14086.t1, g7640.t1, g6274.t1, g108.t1, g14746.t1                                                                                                                                                                                                                                                                                                             | 5               |
| <b>Other enzymes that might be involved in pyrimidine synthesis and metabolism</b>                                                                                                                                                                                                                                                                                                                                                                                                                  |                                                                                                                                                                                                                                                                                                                                                               |                 |
| 1.8.1.9: thioredoxin-disulfide reductase; NADP-thioredoxin reductase; NADPH-thioredoxin reductase; thioredoxin reductase (NADPH);                                                                                                                                                                                                                                                                                                                                                                   | g1067.t1, g19251.t1, g11401.t1, g7370.t1, g16727.t1, g20723.t1, g16238.t1                                                                                                                                                                                                                                                                                     | 7               |
| 2.4.2.1: purine-nucleoside phosphorylase;                                                                                                                                                                                                                                                                                                                                                                                                                                                           | g8354.t1, g6545.t1                                                                                                                                                                                                                                                                                                                                            | 2               |
| 2.4.2.3: uridine phosphorylase;                                                                                                                                                                                                                                                                                                                                                                                                                                                                     | g19470.t1, g3885.t1                                                                                                                                                                                                                                                                                                                                           | 2               |
| 2.4.2.9: uracil phosphoribosyltransferase;                                                                                                                                                                                                                                                                                                                                                                                                                                                          | g5319.t1, g539.t1, g2635.t1                                                                                                                                                                                                                                                                                                                                   | 3               |
| 2.7.1.48: uridine kinase                                                                                                                                                                                                                                                                                                                                                                                                                                                                            | g18950.t1, g9372.t1, g9373.t1, g2130.t1, g2635.t1                                                                                                                                                                                                                                                                                                             | 5               |
| 2.7.4.14: UMP/CMP kinase; cytidylate kinase; deoxycytidylate kinase;                                                                                                                                                                                                                                                                                                                                                                                                                                | g6807.t1, g7627.t1, g18723.t1, g11828.t1                                                                                                                                                                                                                                                                                                                      | 4               |
| 2.7.7.6: DNA-directed RNA polymerase; RNA polymerase; RNA nucleotidyltransferase (DNA-directed); RNA polymerase I; RNA polymerase II; RNA polymerase III; C RNA formation factors; deoxyribonucleic acid-dependent ribonucleic acid polymerase; DNA-dependent ribonucleate nucleotidyltransferase; DNA-dependent RNA nucleotidyltransferase; DNA-dependent RNA polymerase; ribonucleate nucleotidyltransferase;                                                                                     | g14482.t1, g1531.t1, g1532.t1, g4726.t1, g16589.t1, g1891.t1, g9211.t1, g9212.t1, g16532.t1, g10236.t1, g18457.t1, g15754.t1, g19351.t1, g19545.t1, g7252.t1, g1283.t1, g8730.t1, g18584.t1, g2323.t1, g10447.t1, g5153.t1, g3168.t1, g20444.t1, g5828.t1, g15829.t1, g12096.t1, g18256.t1, g9055.t1, g14088.t1, g7800.t1                                     | 30              |
| 2.7.7.7: DNA-directed DNA polymerase; DNA polymerase I; DNA polymerase II; DNA polymerase III; DNA polymerase alpha; DNA polymerase beta; DNA polymerase gamma; DNA nucleotidyltransferase (DNA-directed); DNA nucleotidyltransferase (DNA-directed); deoxyribonucleate nucleotidyltransferase; deoxynucleate polymerase; deoxyribonucleic acid duplicase; deoxyribonucleic acid polymerase; deoxyribonucleic duplicase; deoxyribonucleic polymerase; deoxyribonucleic polymerase I; DNA duplicase; | g12267.t1, g9894.t1, g15977.t1, g854.t1, g3400.t1, g17205.t1, g19366.t1, g5761.t1, g7237.t1, g14931.t1, g5760.t1, g9686.t1, g17850.t1, g11189.t1, g18621.t1, g3464.t1, g4640.t1, g2546.t1, g8974.t1, g9037.t1, g9038.t1, g9056.t1, g2713.t1, g5671.t1, g4661.t1, g7831.t1, g11609.t1, g6682.t1, g18957.t1, g7922.t1, g9536.t1, g1812.t1, g11075.t1, g16276.t1 | 34              |
| 2.7.7.8: polyribonucleotide nucleotidyltransferase;                                                                                                                                                                                                                                                                                                                                                                                                                                                 | g16455.t1, g7714.t1                                                                                                                                                                                                                                                                                                                                           | 2               |
| 3.1.3.5 5'-nucleotidase; uridine 5'-nucleotidase;                                                                                                                                                                                                                                                                                                                                                                                                                                                   | g18957.t1, g7714.t1, g17652.t1, g8859.t1, g4447.t1                                                                                                                                                                                                                                                                                                            | 5               |
| 3.2.2.3: uridine nucleosidase; uridine hydrolase                                                                                                                                                                                                                                                                                                                                                                                                                                                    | g14928.t1, g3292.t1                                                                                                                                                                                                                                                                                                                                           | 2               |
| 3.5.4.12: dCMP deaminase; deoxycytidylate deaminase; deoxy-CMP-deaminase;                                                                                                                                                                                                                                                                                                                                                                                                                           | g2753.t1, g2586.t1, g10378.t1, g593.t1                                                                                                                                                                                                                                                                                                                        | 4               |
| 3.6.1.19: nucleoside-triphosphate diphosphatase;                                                                                                                                                                                                                                                                                                                                                                                                                                                    | g602.t1, g2594.t1, g593.t1                                                                                                                                                                                                                                                                                                                                    | 3               |
| 3.6.1.23: dUTP diphosphatase;                                                                                                                                                                                                                                                                                                                                                                                                                                                                       | g4127.t1, g5812.t1                                                                                                                                                                                                                                                                                                                                            | 2               |
| 3.6.1.5: apyrase; ATP-diphosphatase;                                                                                                                                                                                                                                                                                                                                                                                                                                                                | g9835.t1                                                                                                                                                                                                                                                                                                                                                      | 1               |
| 3.6.1.6: nucleoside diphosphate phosphatase;                                                                                                                                                                                                                                                                                                                                                                                                                                                        | g8837.t1, g9293.t1                                                                                                                                                                                                                                                                                                                                            | 2               |

| <b>Enzymes</b>                                                   | <b>Sequence Names</b>                                                                                              | <b>Number of genes</b> |
|------------------------------------------------------------------|--------------------------------------------------------------------------------------------------------------------|------------------------|
| <b>Amino Acid Biosynthesis</b>                                   |                                                                                                                    |                        |
| <b>Tyrosine (Y), Phenylalanine (F), Tryptopham (W) synthesis</b> |                                                                                                                    |                        |
| Chorismate synthesis (precursor)                                 |                                                                                                                    |                        |
| 2.5.1.54: 3-deoxy-7-phosphoheptulonate synthase                  | g3103.t1, g8371.t1                                                                                                 | 2                      |
| 4.2.3.4: 3-dehydroquinate synthase                               | g4426.t1                                                                                                           | 1                      |
| 4.2.1.10: 3-dehydroquinate dehydratase I                         | g4426.t1                                                                                                           | 1                      |
| 1.1.1.25: Shikimate dehydrogenase                                | g4426.t1                                                                                                           | 1                      |
| 2.7.1.71: Shikimate kinase                                       | g4426.t1                                                                                                           | 1                      |
| 2.5.1.19: 3-phosphoshikimate 1-carboxyvinyltransferase           | g4426.t1                                                                                                           | 1                      |
| 4.2.3.5: Chorismate synthase                                     | g6770.t1                                                                                                           | 1                      |
| Y synthesis                                                      |                                                                                                                    |                        |
| 5.4.99.5: Chorismate mutase                                      | --                                                                                                                 | --                     |
| 1.3.1.13: Prephenate dehydrogenase (NADP+)                       | --                                                                                                                 | --                     |
| 2.6.1.1: Aspartate aminotransferase, cytoplasmic                 | g13273.t1, g13812.t1, g15236.t1, g18784.t1, g18785.t1, g20207.t1, g4650.t1, g4792.t1, g5612.t1, g8199.t1, g8358.t1 | 11                     |
| F synthesis                                                      |                                                                                                                    |                        |
| 5.4.99.5: Chorismate mutase                                      | --                                                                                                                 | --                     |
| 4.2.1.51: Prephenate dehydratase                                 | g8371.t1                                                                                                           | 1                      |
| 2.6.1.1: Aspartate aminotransferase, cytoplasmic                 | g13273.t1, g13812.t1, g15236.t1, g18784.t1, g18785.t1, g20207.t1, g4650.t1, g4792.t1, g5612.t1, g8199.t1, g8358.t1 | 11                     |
| W synthesis                                                      |                                                                                                                    |                        |
| 4.1.3.27: Anthranilate synthase                                  | g6970.t1                                                                                                           | 1                      |
| 2.4.2.18: Anthranilate phosphoribosyltransferase                 | g13589.t1 (trpD)                                                                                                   | 1                      |
| 5.3.1.24: Phosphoribosylanthranilate isomerase                   |                                                                                                                    |                        |
| 4.1.1.48: Indole-3-glycerol phosphate synthase                   | g13589.t1                                                                                                          | 1                      |
| 4.2.1.20: Tryptophan synthase alpha chain                        | g13589.t1, g15906.t1                                                                                               | 2                      |
| <b>Serine (S), Glycine (G), Threonien (T) synthesis</b>          |                                                                                                                    |                        |
| S synthesis from 3-phosphoglycerate                              |                                                                                                                    |                        |
| 1.1.1.95: D-3-phosphoglycerate dehydrogenase                     | g7538.t1, g8967.t1                                                                                                 | 2                      |
| 2.6.1.52: Phosphoserine aminotransferase                         | g11274.t1, g11695.t1, g16539.t1, g16727.t1, g17487.t1, g1993.t1, g3685.t1, g6496.t1                                | 8                      |
| 3.1.3.3: Phosphoserine phosphatase                               | g17330.t1, g8974.t1, g9804.t1                                                                                      | 3                      |
| G synthesis from serine                                          |                                                                                                                    |                        |
| 2.1.2.1: Glycine hydroxymethyltransferase                        | g12557.t1, g12987.t1, g13120.t1, g16051.t1, g16632.t1, g4150.t1, g5450.t1, g5451.t1                                | 8                      |
| T synthesis from L-aspartate                                     |                                                                                                                    |                        |

| <b>Enzymes</b>                                                                                    | <b>Sequence Names</b>                                                               | <b>Number of genes</b> |
|---------------------------------------------------------------------------------------------------|-------------------------------------------------------------------------------------|------------------------|
| 2.7.2.4: Aspartate kinase                                                                         | g14757.t1, g2286.t1, g2287.t1, g330.t1, g5534.t1, g8709.t1, g9518.t1, g9723.t1      | 8                      |
| 1.2.1.11: Aspartate-semialdehyde dehydrogenase                                                    | g10051.t1, g11148.t1, g1591.t1, g3078.t1, g538.t1                                   | 5                      |
| 1.1.1.3: Homoserine dehydrogenase                                                                 | g11082.t1, g13797.t1, g14757.t1, g16165.t1, g2286.t1, g2287.t1, g8123.t1, g9723.t1  | 8                      |
| 2.7.1.39: Homoserine kinase                                                                       | g2239.t1, g8768.t1                                                                  | 2                      |
| 4.2.3.1: Threonine synthase                                                                       | g14064.t1, g14474.t1, g15894.t1, g9263.t1                                           | 4                      |
| <b>Arginine (R), Proline (P) synthesis</b>                                                        |                                                                                     |                        |
| R synthesis from glutamate                                                                        |                                                                                     |                        |
| 2.3.1.1: Amino-acid N-acetyltransferase                                                           | --                                                                                  | --                     |
| 2.7.2.8: Acetylglutamate kinase                                                                   | --                                                                                  | --                     |
| 1.2.1.38: N-acetyl-gamma-glutamyl-phosphate reductase                                             | g1591.t1, g538.t1                                                                   | 2                      |
| 2.6.1.11: Acetylornithine aminotransferase                                                        | g9949.t1                                                                            | 1                      |
| 3.5.1.16: Acetylornithine deacetylase                                                             | g11470.t1, g15979.t1, g5682.t1, g7835.t1                                            | 4                      |
| 2.1.3.3: Ornithine carbamoyltransferase (urea cycle)                                              | g11723.t1                                                                           | 1                      |
| 6.3.4.5: Argininosuccinate synthase (urea cycle)                                                  | --                                                                                  | --                     |
| 4.3.2.1: Argininosuccinate lyase (urea cycle)                                                     | g7980.t1                                                                            | 1                      |
| P synthesis from glutamate                                                                        |                                                                                     |                        |
| 2.7.2.11: Glutamate 5-kinase                                                                      | g12819.t1, g3326.t1                                                                 | 2                      |
| 1.2.1.41: Glutamate-5-semialdehyde dehydrogenase                                                  | g4536.t1                                                                            | 1                      |
| 1.5.1.2: Pyrroline-5-carboxylate reductase                                                        | g15260.t1, g6808.t1                                                                 | 2                      |
| <b>Alanine (A), Aspartic acid (D), Asparagine (N), Glutamic acid (E), Glutamine (Q) synthesis</b> |                                                                                     |                        |
| A synthesis from pyruvate                                                                         |                                                                                     |                        |
| 2.6.1.44: Alanine-glyoxylate transaminase                                                         | g11401.t1, g12516.t1, g16262.t1, g3045.t1, g7370.t1, g9503.t1                       | 6                      |
| D synthesis from oxaloacetate                                                                     |                                                                                     |                        |
| 2.6.1.1: Aspartate aminotransferase, cytoplasmic                                                  | g5612.t1, g16262.t1, g11161.t1, g19987.t1, g4792.t1, g18784.t1, g7370.t1, g18785.t1 | 8                      |
| N synthesis from aspartate                                                                        |                                                                                     |                        |
| 6.3.5.4: Asparagine synthase (glutamine-hydrolysing)                                              | g5566.t1, g6052.t1, g413.t1, g14518.t1, g10842.t1, g3142.t1, g8052.t1               | 7                      |
| E synthesis from 2-oxoglutarate                                                                   |                                                                                     |                        |
| 1.4.1.13 /1.4.1.14: Glutamate synthase NADPH/ Glutamate synthase NADH                             | g5164.t1, g3030.t1, g5164.t1                                                        | 3                      |
| Q synthesis from glutamate                                                                        |                                                                                     |                        |

| <b>Enzymes</b>                                                                                                                                                                                                                                 | <b>Sequence Names</b>                                                              | <b>Number of genes</b> |
|------------------------------------------------------------------------------------------------------------------------------------------------------------------------------------------------------------------------------------------------|------------------------------------------------------------------------------------|------------------------|
| 6.3.1.2: Glutamine synthetase                                                                                                                                                                                                                  | g13643.t1, g17262.t1, g3340.t1, g3575.t1, g5100.t1, g6410.t1, g8513.t1             | 7                      |
| <b>Cysteine (C) , Methionine (M) synthesis</b>                                                                                                                                                                                                 |                                                                                    |                        |
| C synthesis from serine                                                                                                                                                                                                                        |                                                                                    |                        |
| 2.3.1.30: Serine O-acetyltransferase                                                                                                                                                                                                           | --                                                                                 | --                     |
| 2.5.1.47: Cysteine synthase A                                                                                                                                                                                                                  | g3030.t1                                                                           | 1                      |
| M synthesis from aspartate                                                                                                                                                                                                                     |                                                                                    |                        |
| 2.7.2.4: Aspartate kinase                                                                                                                                                                                                                      | g14757.t1, g2286.t1, g2287.t1, g330.t1, g5534.t1, g8709.t1, g9518.t1, g9723.t1     | 8                      |
| 1.2.1.11: Aspartate-semialdehyde dehydrogenase                                                                                                                                                                                                 | g10051.t1, g11148.t1, g1591.t1, g3078.t1, g538.t1                                  | 5                      |
| 1.1.1.3: Homoserine dehydrogenase                                                                                                                                                                                                              | g11082.t1, g13797.t1, g14757.t1, g16165.t1, g2286.t1, g2287.t1, g8123.t1, g9723.t1 | 8                      |
| 2.3.1.31: Homoserine O-acetyltransferase                                                                                                                                                                                                       | --                                                                                 | --                     |
| 2.5.1.48: Cystathionine gamma-synthase                                                                                                                                                                                                         | g16732.t1                                                                          | 1                      |
| 4.4.1.8: Cystathionine beta-lyase                                                                                                                                                                                                              | g5174.t1, g9342.t1                                                                 | 2                      |
| 2.1.1.5/2.1.1.10/2.1.1.13/2.1.1.14: Betaine-homocysteine S-methyltransferase /Homocysteine S-methyltransferase/5-methyltetrahydrofolate--homocysteine methyltransferase /5-methyltetrahydropteroyltriglutamate--homocysteine methyltransferase | g1133.t1, g4961.t1, g8955.t1                                                       | 3                      |
| <b>Valine (V), Leucine (L), Isoleucine (I) synthesis</b>                                                                                                                                                                                       |                                                                                    |                        |
| V synthesis from pyruvate                                                                                                                                                                                                                      |                                                                                    |                        |
| 2.2.1.6: Acetolactate synthase I/II/III large subunit                                                                                                                                                                                          | g14751.t1                                                                          | 1                      |
| 1.1.1.86: Ketol-acid reductoisomerase                                                                                                                                                                                                          | --                                                                                 | --                     |
| 4.2.1.9: Dihydroxy-acid dehydratase                                                                                                                                                                                                            | --                                                                                 | --                     |
| 2.6.1.42: Branched-chain amino acid aminotransferase                                                                                                                                                                                           | g1847.t1, g8320.t1                                                                 | 2                      |
| L synthesis from pyruvate                                                                                                                                                                                                                      |                                                                                    |                        |
| 2.2.1.6: Acetolactate synthase I/II/III large subunit                                                                                                                                                                                          | g14751.t1                                                                          | 1                      |
| 1.1.1.86: Ketol-acid reductoisomerase                                                                                                                                                                                                          | --                                                                                 | --                     |
| 4.2.1.9: Dihydroxy-acid dehydratase                                                                                                                                                                                                            | --                                                                                 | --                     |
| 2.3.3.13: 2-isopropylmalate synthase                                                                                                                                                                                                           | --                                                                                 | --                     |
| 4.2.1.33: 3-isopropylmalate dehydratase                                                                                                                                                                                                        | --                                                                                 | --                     |
| 1.1.1.85: 3-isopropylmalate dehydrogenase                                                                                                                                                                                                      | --                                                                                 | --                     |
| 2.6.1.42: Branched-chain amino acid aminotransferase                                                                                                                                                                                           | g1847.t1, g8320.t1                                                                 | 2                      |
| I synthesis from 2-oxobutanoate                                                                                                                                                                                                                |                                                                                    |                        |



| Enzymes                                                                           | Sequence Names                                                                 | Number of genes |
|-----------------------------------------------------------------------------------|--------------------------------------------------------------------------------|-----------------|
| 2.2.1.6: Acetolactate synthase I/II/III large subunit                             | g14751.t1                                                                      | 1               |
| 1.1.1.86: Ketol-acid reductoisomerase                                             |                                                                                |                 |
| 4.2.1.9: Dihydroxy-acid dehydratase                                               |                                                                                |                 |
| 2.6.1.42: Branched-chain amino acid aminotransferase                              | g1847.t1, g8320.t1                                                             | 2               |
| <b>Lysine (K) synthesis</b>                                                       |                                                                                |                 |
| K synthesis from aspartate                                                        |                                                                                |                 |
| 2.7.2.4: Aspartate kinase                                                         | g14757.t1, g2286.t1, g2287.t1, g330.t1, g5534.t1, g8709.t1, g9518.t1, g9723.t1 | 8               |
| 1.2.1.11: Aspartate-semialdehyde dehydrogenase                                    | g10051.t1, g11148.t1, g1591.t1, g3078.t1, g538.t1                              | 5               |
| 4.2.1.52: Dihydrodipicolinate synthase                                            |                                                                                |                 |
| 1.3.1.26: Dihydrodipicolinate reductase                                           |                                                                                |                 |
| 2.3.1.117: 2,3,4,5-tetrahydropyridine-2-carboxylate N-succinyltransferase         |                                                                                |                 |
| 2.6.1.17: N-succinyldiaminopimelate aminotransferase                              | g10836.t1                                                                      | 1               |
| 3.5.1.18: Succinyl-diaminopimelate desuccinylase                                  |                                                                                |                 |
| 5.1.1.7: Diaminopimelate epimerase                                                |                                                                                |                 |
| 4.1.1.20: Diaminopimelate decarboxylase                                           | g12946.t1                                                                      | 1               |
| <b>Histidine (H) synthesis</b>                                                    |                                                                                |                 |
| H synthesis from PRPP                                                             |                                                                                |                 |
| 2.4.2.17: ATP phosphoribosyltransferase                                           |                                                                                |                 |
| 3.6.1.31: Phosphoribosyl-ATP pyrophosphohydrolase                                 | g21.t1                                                                         | 1               |
| 3.5.4.19: Phosphoribosyl-AMP cyclohydrolase                                       |                                                                                |                 |
| 5.3.1.16: Phosphoribosylformimino-5-aminoimidazole carboxamide ribotide isomerase | --                                                                             | --              |
| 2.6.1.16: Glutamine amidotransferase                                              | g6052.t1, g5164.t1                                                             | 2               |
| 4.2.1.19: Imidazoleglycerol-phosphate dehydratase                                 |                                                                                |                 |
| 2.6.1.9: Histidinol-phosphate aminotransferase                                    | g13273.t1, g13812.t1, g15236.t1, g20207.t1, g4650.t1, g8199.t1, g8358.t1       | 7               |
| 3.1.3.15: Histidinol-phosphatase                                                  | g9452.t1                                                                       | 1               |
| 1.1.1.23: histidinol dehydrogenase                                                |                                                                                |                 |
| Other enzymes that might be involved in amino acid biosynthesis                   |                                                                                |                 |
| 1.1.1.87: aksF; methanogen homoisocitrate dehydrogenase                           | g10497.t1, g7376.t1                                                            | 2               |
| 1.1.1.42: IDH1, IDH2, icd; isocitrate dehydrogenase                               | g19124.t1, g629.t1, g7997.t1, g9270.t1                                         | 4               |
| 1.14.16.1: phhA, PAH; phenylalanine-4-hydroxylase                                 | g10912.t1, g9123.t1                                                            | 2               |

| <b>Enzymes</b>                                                                                                            | <b>Sequence Names</b>                                                                                                                                                                                       | <b>Number of genes</b> |
|---------------------------------------------------------------------------------------------------------------------------|-------------------------------------------------------------------------------------------------------------------------------------------------------------------------------------------------------------|------------------------|
| 1.2.1.-: lysY; N-acetyl-gamma-glutamyl-phosphate/LysW-gamma-L-alpha-aminoadipyl-6-phosphate reductase                     | g17342.t1, g17343.t1, g2816.t1, g7597.t1                                                                                                                                                                    | 4                      |
| 1.2.1.12: GAPDH, gapA; glyceraldehyde 3-phosphate dehydrogenase                                                           | g1268.t1, g15719.t1, g5105.t1, g5318.t1                                                                                                                                                                     | 4                      |
| 1.2.1.3: ALDH7A1; aldehyde dehydrogenase family 7 member A1                                                               | g10929.t1, g15115.t1, g405.t1, g4882.t1, g5125.t1, g6908.t1, g7274.t1, g8354.t1, g9892.t1                                                                                                                   | 9                      |
| 1.2.1.31: ALDH7A1; aldehyde dehydrogenase family 7 member A1                                                              | g20352.t1, g5125.t1, g15116.t1, g2093.t1, g2093.t1, g5125.t1                                                                                                                                                | 6                      |
| 2.1.1.-: yrrT; putative AdoMet-dependent methyltransferase                                                                | g10472.t1, g12038.t1, g13735.t1, g1577.t1, g19021.t1, g20152.t1, g3051.t1, g3395.t1, g4450.t1, g4942.t1, g5375.t1, g5638.t1, g6685.t1, g7116.t1, g7694.t1, g8036.t1, g8150.t1, g8333.t1, g8768.t1, g9076.t1 | 20                     |
| 2.2.1.1: tktA, tktB; transketolase                                                                                        | g5062.t1, g7241.t1, g7317.t1                                                                                                                                                                                | 3                      |
| 2.2.1.2: tal-pgi; transaldolase / glucose-6-phosphate isomerase                                                           | g12919.t1, g13038.t1, g15227.t1, g265.t1                                                                                                                                                                    | 4                      |
| 2.3.3.1: citrate (Si)-synthase                                                                                            | g12081.t1, g13345.t1, g16719.t1, g18242.t1, g19126.t1, g474.t1, g477.t1, g5893.t1, g6197.t1, g6553.t1, g8175.t1                                                                                             | 11                     |
| 2.5.1.6: metK; S-adenosylmethionine synthetase                                                                            | g12039.t1, g13225.t1, g15738.t1, g17234.t1, g6035.t1, g6739.t1                                                                                                                                              | 6                      |
| LYSN; 2-aminoadipate transaminase patA; aminotransferase lysJ; acetylornithine/LysW-gamma-L-lysine aminotransferase GGAT; | g11016.t1, g3104.t1, g4982.t1, g4983.t1, g6033.t1, g6229.t1                                                                                                                                                 | 6                      |
| 2.6.1.2; GPT, ALT; alanine transaminase alaA; alanine-synthesizing transaminase GGAT;                                     | g13226.t1, g2414.t1                                                                                                                                                                                         | 2                      |
| 2.6.1.2: TAT; tyrosine aminotransferase ARO8; aromatic amino acid aminotransferase I                                      | g12493.t1, g13273.t1, g13812.t1, g15236.t1, g20207.t1, g4650.t1, g8199.t1, g8358.t1                                                                                                                         | 8                      |
| 2.6.1.57: ARO8; aromatic amino acid aminotransferase I tyrB; aromatic-amino-acid transaminase                             | g13273.t1, g13812.t1, g15236.t1, g20207.t1, g4650.t1, g8199.t1, g8358.t1                                                                                                                                    | 7                      |
| 2.6.1.7: AADAT, KAT2; kynurenine/2-aminoadipate aminotransferase                                                          | g10836.t1                                                                                                                                                                                                   | 1                      |
| 2.6.1.83: LL-diaminopimelate aminotransferase                                                                             | g15640.t1                                                                                                                                                                                                   | 1                      |
| 2.7.1.11: pfkA, PFK; 6-phosphofructokinase 1 pfkB; 6-phosphofructokinase 2                                                | g11905.t1, g13580.t1, g16188.t1, g3565.t1, g4532.t1                                                                                                                                                         | 5                      |
| 2.7.1.40: PK, pyk; pyruvate kinase                                                                                        | g13651.t1, g13951.t1, g1953.t1, g3035.t1, g4450.t1, g7810.t1, g7811.t1                                                                                                                                      | 7                      |
| 2.7.2.3: PGK, pgk; phosphoglycerate kinase                                                                                | g16261.t1, g6745.t1                                                                                                                                                                                         | 2                      |

| <b>Enzymes</b>                                                                                           | <b>Sequence Names</b>                                                                                                                                | <b>Number of genes</b> |
|----------------------------------------------------------------------------------------------------------|------------------------------------------------------------------------------------------------------------------------------------------------------|------------------------|
| 2.7.6.1: PRPS, prsA; ribose-phosphate pyrophosphokinase                                                  | g13783.t1, g14804.t1, g16201.t1, g18249.t1, g19930.t1, g5424.t1, g9663.t1                                                                            | 7                      |
| 3.1.3.11: K01622; fructose 1,6-bisphosphate aldolase/phosphatase                                         | g14101.t1, g14685.t1, g17520.t1, g17521.t1, g8034.t1                                                                                                 | 5                      |
| 3.2.2.9: K18284; adenosylhomocysteine /aminodeoxyfufalosine nucleosidase                                 | g3893.t1, g8334.t1                                                                                                                                   | 2                      |
| 3.5.1.14: ACY1; aminoacylase                                                                             | g1045.t1, g16485.t1, g18485.t1, g4698.t1                                                                                                             | 4                      |
| 3.5.3.1: rocF, arg; arginase                                                                             | g17079.t1, g4127.t1                                                                                                                                  | 2                      |
| 4.1.2.13: K16306; fructose-bisphosphate aldolase / 2-amino-3,7-dideoxy-D-threo-hept-6-ulosonate synthase | g1265.t1, g3323.t1                                                                                                                                   | 2                      |
| 4.1.2.5: ltaE; threonine aldolase                                                                        | g799.t1                                                                                                                                              | 1                      |
| 4.3.2.10: hisF; cyclase HIS7; glutamine amidotransferase / cyclase                                       | g11320.t1                                                                                                                                            | 1                      |
| 4.2.1.11: ENO, eno; enolase                                                                              | g10562.t1, g4531.t1                                                                                                                                  | 2                      |
| 2.5.1.47: cysO; cysteine synthase / O-phosphoserine sulfhydrylase / cystathionine beta-synthase          | g13209.t1, g9095.t1                                                                                                                                  | 2                      |
| 4.2.1.3: ACO, acnA; aconitate hydratase                                                                  | g10767.t1, g12236.t1, g12237.t1, g12238.t1, g12259.t1, g14059.t1, g15984.t1, g15985.t1, g17251.t1, g18949.t1, g2848.t1, g4475.t1, g9355.t1, g9467.t1 | 14                     |
| 4.2.1.99: acnB; aconitate hydratase 2 / 2-methylisocitrate dehydratase                                   | g10767.t1, g12236.t1, g12237.t1, g12238.t1, g14059.t1, g17251.t1, g2848.t1, g9467.t1                                                                 | 8                      |
| 4.3.1.12: ocd; ornithine cyclodeaminase                                                                  | g18055.t1, g16049.t1, g20353.t1, g7203.t1                                                                                                            | 4                      |
| 4.3.1.19: ilvA, tdcB; threonine dehydratase                                                              | g16049.t1                                                                                                                                            | 1                      |
| 4.4.1.1: mccB; cystathionine gamma-lyase / homocysteine desulfhydrase                                    | g5175.t1                                                                                                                                             | 1                      |
| 4.4.1.8: metC; cystathionine beta-lyase                                                                  | g14385.t1                                                                                                                                            | 1                      |
| 5.1.3.1: rpe, RPE; ribulose-phosphate 3-epimerase                                                        | g11989.t1, g16002.t1                                                                                                                                 | 2                      |
| 5.3.1.1: TPI, tpiA; triosephosphate isomerase (TIM)                                                      | g2077.t1                                                                                                                                             | 1                      |
| 5.3.1.6: rpiB; ribose 5-phosphate isomerase B                                                            | g10558.t1, g11785.t1, g12957.t1, g565.t1                                                                                                             | 4                      |
| 2.2.1.2: tal-pgi; transaldolase / glucose-6-phosphate isomerase                                          | g15821.t1, g3214.t1                                                                                                                                  | 2                      |
| 5.4.2.11: PGAM, gpmA; 2,3-bisphosphoglycerate-dependent phosphoglycerate mutase                          | g11930.t1                                                                                                                                            | 1                      |
| 5.4.2.12: gpmI; 2,3-bisphosphoglycerate-                                                                 | g6352.t1                                                                                                                                             | 1                      |

| Enzymes                                                                | Sequence Names                                                                                                             | Number of genes |
|------------------------------------------------------------------------|----------------------------------------------------------------------------------------------------------------------------|-----------------|
| independent phosphoglycerate mutase                                    |                                                                                                                            |                 |
| <b>Fatty acid biosynthesis</b>                                         |                                                                                                                            |                 |
| 1.1.1.100: 3-oxoacyl-[acyl-carrier-protein] reductase;                 | g10497.t1, g14059.t1, g3962.t1, g5691.t1                                                                                   | 4               |
| 1.3.1.10: enoyl-[acyl-carrier-protein] reductase (NADPH, Si-specific); | g5691.t1                                                                                                                   | 1               |
| 2.3.1.39: [acyl-carrier-protein] S-malonyltransferase;                 | g5691.t1                                                                                                                   | 1               |
| 2.3.1.41: beta-ketoacyl-[acyl-carrier-protein] synthase I              | g5691.t1                                                                                                                   | 1               |
| 2.3.1.85: fatty-acid synthase; FASN (gene name)                        | g12138.t1                                                                                                                  | 1               |
| 3.1.2.14: oleoyl-[acyl-carrier-protein] hydrolase                      | g5691.t1, g5691.t1, g5691.t1                                                                                               | 3               |
| 4.2.1.59: 3-hydroxyacyl-[acyl-carrier-protein] dehydratase;            | g5691.t1                                                                                                                   | 1               |
| 6.2.1.3: long-chain-fatty-acid---CoA ligase;                           | g7296.t1, g7880.t1, g7882.t1, g10624.t1, g6814.t1, g8060.t1, g7294.t1, g14826.t1, g8513.t1, g6410.t1, g17262.t1, g13748.t1 | 12              |
| 6.4.1.2: acetyl-CoA carboxylase; acetyl coenzyme A carboxylase         | g16665.t1, g645.t1                                                                                                         | 2               |
| <b>Fatty acid elongation</b>                                           |                                                                                                                            |                 |
| 1.1.1.330: very-long-chain 3-oxoacyl-CoA reductase;                    | g7376.t1                                                                                                                   | 1               |
| 1.1.1.35: 3-hydroxyacyl-CoA dehydrogenase;                             | g10565.t1, g6421.t1                                                                                                        | 2               |
| 2.3.1.16: acetyl-CoA C-acyltransferase;                                | g20084.t1, g12162.t1, g3411.t1, g9558.t1                                                                                   | 4               |
| 2.3.1.199: very-long-chain 3-oxoacyl-CoA synthase;                     | g1887.t1, g8424.t1                                                                                                         | 2               |
| 3.1.2.22: palmitoyl[protein] hydrolase;                                | g3997.t1, g11079.t1                                                                                                        | 2               |
| 4.2.1.17: enoyl-CoA hydratase                                          | g5758.t1, g10565.t1, g5174.t1                                                                                              | 3               |
| <b>Fatty acid degradation</b>                                          |                                                                                                                            |                 |
| 1.1.1.1: alcohol dehydrogenase; aldehyde reductase; ADH;               | g17476.t1, g17477.t1, g17478.t1, g8973.t1, g1813.t1, g14245.t1, g3976.t1                                                   | 7               |
| 1.1.1.35: 3-hydroxyacyl-CoA dehydrogenase;                             | g10565.t1, g6421.t1                                                                                                        | 2               |
| 1.14.14.1: unspecific monooxygenase;                                   | g15444.t1                                                                                                                  | 1               |
| 1.2.1.3: aldehyde dehydrogenase (NAD+);                                | g10929.t1, g15115.t1, g6908.t1, g9892.t1, g405.t1, g7274.t1, g5125.t1, g8354.t1, g4882.t1                                  | 9               |
| 1.2.1.48: long-chain-aldehyde dehydrogenase;                           | g7274.t1                                                                                                                   | 1               |
| 1.3.3.6: acyl-CoA oxidase;                                             | g15580.t1, g8950.t1, g8951.t1, g8952.t1, g1484.t1, g4622.t1, g17278.t1, g2229.t1                                           | 8               |
| 1.3.8.1: short-chain acyl-CoA dehydrogenase;                           | g323.t1, g18766.t1, g4114.t1, g7262.t1                                                                                     | 4               |

| Enzymes                                                                                                                                                                         | Sequence Names                                                                                                             | Number of genes |
|---------------------------------------------------------------------------------------------------------------------------------------------------------------------------------|----------------------------------------------------------------------------------------------------------------------------|-----------------|
| 1.3.8.6: glutaryl-CoA dehydrogenase (ETF);                                                                                                                                      | g15267.t1, g16656.t1                                                                                                       | 2               |
| 2.3.1.16: acetyl-CoA C-acyltransferase; beta-ketothiolase; 3-ketoacyl-CoA thiolase;                                                                                             | g20084.t1, g12162.t1, g3411.t1, g9558.t1                                                                                   | 4               |
| 2.3.1.9: acetyl-CoA C-acetyltransferase;                                                                                                                                        | g15576.t1, g4193.t1                                                                                                        | 2               |
| 4.2.1.17: enoyl-CoA hydratase;                                                                                                                                                  | g5758.t1, g10565.t1, g5174.t1                                                                                              | 3               |
| 5.3.3.8: dodecenoyl-CoA isomerase;                                                                                                                                              | g19464.t1, g10565.t1, g17157.t1                                                                                            | 3               |
| 6.2.1.3: long-chain-fatty-acid---CoA ligase; acyl-CoA synthetase; fatty acid thiokinase (long chain); acyl-activating enzyme; palmitoyl-CoA synthase; lignoceroyl-CoA synthase; | g7296.t1, g7880.t1, g7882.t1, g10624.t1, g6814.t1, g8060.t1, g7294.t1, g14826.t1, g8513.t1, g6410.t1, g17262.t1, g13748.t1 | 12              |
| <b>Pyruvate metabolism</b>                                                                                                                                                      |                                                                                                                            |                 |
| 1.1.1.37: malate dehydrogenase; malic dehydrogenase; L-malate dehydrogenase; NAD-L-malate dehydrogenase; malic acid dehydrogenase; NAD-dependent malic dehydrogenase;           | g17707.t1, g3242.t1, g10767.t1, g17251.t1, g2848.t1, g4769.t1, g2054.t1, g14670.t1, g19916.t1, g4492.t1                    | 10              |
| 1.1.1.38: malate dehydrogenase (oxaloacetate-decarboxylating); 'malic' enzyme (ambiguous);                                                                                      | g16222.t1, g16220.t1, g12521.t1, g1030.t1, g8330.t1                                                                        | 5               |
| 1.1.1.40: malate dehydrogenase (oxaloacetate-decarboxylating) (NADP+); 'malic' enzyme (ambiguous);                                                                              | g18320.t1, g20352.t1, g20353.t1, g20354.t1, g9873.t1, g16222.t1, g16220.t1, g12521.t1, g1030.t1, g8330.t1                  | 10              |
| 1.1.1.79: glyoxylate reductase (NADP+);                                                                                                                                         | g16491.t1                                                                                                                  | 1               |
| 1.1.2.3: L-lactate dehydrogenase (cytochrome);                                                                                                                                  | g2637.t1, g613.t1, g15576.t1, g7475.t1, g6734.t1, g7285.t1, g4136.t1                                                       | 7               |
| 1.1.5.4: malate dehydrogenase (quinone); FAD-dependent malate-vitamin K reductase;                                                                                              | g3976.t1, g9723.t1, g4347.t1, g13513.t1, g4347.t1, g13513.t1                                                               | 6               |
| 1.2.1.3: aldehyde dehydrogenase (NAD+); CoA-independent aldehyde dehydrogenase; m-methylbenzaldehyde dehydrogenase;                                                             | g10929.t1, g15115.t1, g6908.t1, g9892.t1, g405.t1, g7274.t1, g5125.t1, g8354.t1, g4882.t1                                  | 9               |
| 1.2.4.1: pyruvate dehydrogenase (acetyl-transferring);                                                                                                                          | g4674.t1                                                                                                                   | 1               |
| 1.8.1.4: dihydrolipoyl dehydrogenase                                                                                                                                            | g2390.t1, g11161.t1, g7447.t1                                                                                              | 3               |
| 2.3.1.12: dihydrolipoyllysine-residue acetyltransferase                                                                                                                         | g14980.t1, g467.t1, g872.t1                                                                                                | 3               |
| 2.3.1.9: acetyl-CoA C-acetyltransferase                                                                                                                                         | g15576.t1, g4193.t1                                                                                                        | 2               |
| 2.3.3.9: malate synthase; L-malate glyoxylate-lyase (CoA-acetylating);                                                                                                          | g7986.t1, g7987.t1, g3061.t1, g3889.t1                                                                                     | 4               |
| 2.7.1.40: pyruvate kinase; phosphoenolpyruvate kinase; phosphoenol transphosphorylase                                                                                           | g4450.t1, g7810.t1, g7811.t1, g13951.t1, g13651.t1, g1953.t1, g3035.t1                                                     | 7               |
| 2.7.9.1: pyruvate, phosphate dikinase; pyruvate, orthophosphate dikinase;                                                                                                       | g16026.t1, g2241.t1                                                                                                        | 2               |
| 3.1.2.6: hydroxyacylglutathione hydrolase;                                                                                                                                      | g19845.t1, g14384.t1, g17478.t1                                                                                            | 3               |
| 3.6.1.7: acylphosphatase; acetylphosphatase;                                                                                                                                    | g8323.t1                                                                                                                   | 1               |

| <b>Enzymes</b>                                                                                                 | <b>Sequence Names</b>                                                                                                                                                                                                                                                                                                                                                                                                                                                           | <b>Number of genes</b> |
|----------------------------------------------------------------------------------------------------------------|---------------------------------------------------------------------------------------------------------------------------------------------------------------------------------------------------------------------------------------------------------------------------------------------------------------------------------------------------------------------------------------------------------------------------------------------------------------------------------|------------------------|
| 4.1.1.49: phosphoenolpyruvate carboxykinase (ATP)                                                              | g9192.t1, g834.t1, g12237.t1                                                                                                                                                                                                                                                                                                                                                                                                                                                    | 3                      |
| 4.2.1.2: fumarate hydratase; fumarase; L-malate hydro-lyase; (S)-malate hydro-lyase                            | g14808.t1, g13023.t1, g17892.t1, g9027.t1                                                                                                                                                                                                                                                                                                                                                                                                                                       | 4                      |
| 4.4.1.5: lactoylglutathione lyase;                                                                             | g13761.t1, g15637.t1                                                                                                                                                                                                                                                                                                                                                                                                                                                            | 2                      |
| 6.2.1.1: acetate---CoA ligase; acetyl-CoA synthetase;                                                          | g11834.t1, g4449.t1, g6814.t1, g7882.t1                                                                                                                                                                                                                                                                                                                                                                                                                                         | 4                      |
| 6.4.1.2: acetyl-CoA carboxylase                                                                                | g16665.t1, g645.t1                                                                                                                                                                                                                                                                                                                                                                                                                                                              | 2                      |
| <b>Endocytosis</b>                                                                                             |                                                                                                                                                                                                                                                                                                                                                                                                                                                                                 |                        |
| 2.7.1.68: 1-phosphatidylinositol-4-phosphate 5-kinase; diphosphoinositide kinase; PIP kinase; phosphatidylinos | g16179.t1, g16854.t1, g2116.t1, g4883.t1, g5536.t1, g9051.t1, g11452.t1, g15684.t1, g8518.t1, g5196.t1, g232.t1, g10965.t1, g13746.t1, g13745.t1, g16770.t1, g18891.t1                                                                                                                                                                                                                                                                                                          | 16                     |
| 2.7.10.2: non-specific protein-tyrosine kinase;                                                                | g5164.t1, g4826.t1                                                                                                                                                                                                                                                                                                                                                                                                                                                              | 2                      |
| 2.7.11.16: G-protein-coupled receptor kinase;                                                                  | g13016.t1, g1025.t1, g3553.t1                                                                                                                                                                                                                                                                                                                                                                                                                                                   | 3                      |
| 3.1.2.15: ubiquitin thiolesterase; ubiquitin carboxy-terminal esterase                                         | g1263.t1, g10673.t1, g6274.t1, g9008.t1, g13783.t1, g352.t1, g5424.t1, g9663.t1, g10674.t1, g17597.t1, g108.t1, g14746.t1, g15238.t1, g20.t1, g7322.t1, g12318.t1, g11078.t1, g14168.t1, g15144.t1, g19068.t1, g19447.t1, g10503.t1, g16249.t1, g12656.t1, g8042.t1, g17067.t1, g16252.t1, g16250.t1, g6727.t1, g7708.t1, g4168.t1, g8284.t1, g13912.t1, g4523.t1                                                                                                               | 34                     |
| 3.6.5.5: dynamin GTPase                                                                                        | g10661.t1, g10662.t1, g12791.t1, g4857.t1, g9636.t1                                                                                                                                                                                                                                                                                                                                                                                                                             | 5                      |
| 6.3.2.19: ubiquitin---protein ligase; ubiquitin-activating enzyme                                              | g13350.t1, g324.t1, g9376.t1, g12917.t1, g8263.t1, g15902.t1, g5100.t1, g17183.t1, g3340.t1, g3575.t1, g11395.t1, g20628.t1, g4994.t1, g6060.t1, g9284.t1, g149.t1, g5149.t1, g14073.t1, g5071.t1, g3267.t1, g9208.t1, g1990.t1, g8759.t1, g4515.t1, g9401.t1, g7149.t1, g1054.t1, g11794.t1, g10838.t1, g11063.t1, g13643.t1, g2579.t1, g6216.t1, g13004.t1, g18583.t1, g116.t1, g10400.t1, g8850.t1, g12048.t1, g4607.t1, g5302.t1, g9820.t1, g3882.t1, g10181.t1, g12066.t1, | 110                    |

| Enzymes                                                                                                       | Sequence Names                                                                                                                                                                                                                                                                                                                                                                                                                                                                                                                                                                                                                                                                       | Number of genes |
|---------------------------------------------------------------------------------------------------------------|--------------------------------------------------------------------------------------------------------------------------------------------------------------------------------------------------------------------------------------------------------------------------------------------------------------------------------------------------------------------------------------------------------------------------------------------------------------------------------------------------------------------------------------------------------------------------------------------------------------------------------------------------------------------------------------|-----------------|
|                                                                                                               | g8023.t1, g7983.t1, g8895.t1, g147.t1, g9219.t1, g12171.t1, g619.t1, g1055.t1, g7512.t1, g3647.t1, g8702.t1, g16504.t1, g11097.t1, g3065.t1, g6782.t1, g1528.t1, g7830.t1, g14590.t1, g148.t1, g12116.t1, g18155.t1, g2297.t1, g9108.t1, g396.t1, g4071.t1, g1943.t1, g7580.t1, g4339.t1, g15379.t1, g16395.t1, g579.t1, g6105.t1, g13351.t1, g1969.t1, g460.t1, g9218.t1, g981.t1, g15246.t1, g9105.t1, g5749.t1, g8471.t1, g8215.t1, g8006.t1, g19210.t1, g11462.t1, g18992.t1, g10056.t1, g3654.t1, g18763.t1, g4388.t1, g19807.t1, g5841.t1, g5840.t1, g2539.t1, g11376.t1, g1708.t1, g5859.t1, g12901.t1, g185.t1, g6108.t1, g3614.t1, g13199.t1, g19951.t1, g11723.t1, g647.t1 |                 |
| <b>Enzymes related to Phagosome processes</b>                                                                 |                                                                                                                                                                                                                                                                                                                                                                                                                                                                                                                                                                                                                                                                                      |                 |
| 2.7.1.137: phosphatidylinositol 3-kinase;                                                                     | g2465.t1, g17818.t1                                                                                                                                                                                                                                                                                                                                                                                                                                                                                                                                                                                                                                                                  | 2               |
| 2.7.1.150: 1-phosphatidylinositol-3-phosphate 5-kinase                                                        | g7094.t1                                                                                                                                                                                                                                                                                                                                                                                                                                                                                                                                                                                                                                                                             | 1               |
| 3.6.3.14: H <sup>+</sup> -transporting two-sector ATPase                                                      | g1027.t1, g10076.t1, g16058.t1, g16059.t1, g13480.t1, g10622.t1, g2780.t1, g4415.t1, g15533.t1, g15706.t1, g14951.t1, g7935.t1, g5142.t1, g5143.t1, g19157.t1, g7051.t1, g8137.t1, g16352.t1, g17037.t1, g13176.t1, g2225.t1, g2226.t1, g2227.t1, g2228.t1, g3147.t1, g4262.t1, g4504.t1, g10609.t1                                                                                                                                                                                                                                                                                                                                                                                  | 28              |
| <b>Enzymes related to Lysosome processes</b>                                                                  |                                                                                                                                                                                                                                                                                                                                                                                                                                                                                                                                                                                                                                                                                      |                 |
| 2.7.8.17: UDP-N-acetylglucosamine---lysosomal-enzyme N-acetylglucosaminophosphotransferase;                   | g13117.t1, g6737.t1, g10248.t1                                                                                                                                                                                                                                                                                                                                                                                                                                                                                                                                                                                                                                                       | 3               |
| 3.1.1.13: sterol esterase; cholesterol esterase;                                                              | g15814.t1, g3553.t1                                                                                                                                                                                                                                                                                                                                                                                                                                                                                                                                                                                                                                                                  | 2               |
| 3.1.1.5: lysophospholipase; lecithinase B; lysolecithinase; phospholipase B; lysophosphatidase; lecitholipase | g4946.t1, g9609.t1, g13411.t1, g7620.t1, g9921.t1, g9922.t1, g13807.t1, g10549.t1, g5180.t1                                                                                                                                                                                                                                                                                                                                                                                                                                                                                                                                                                                          | 9               |
| 3.1.2.22: palmitoyl[protein] hydrolase; palmitoyl-protein thioesterase; palmitoyl-                            | g3997.t1, g11079.t1                                                                                                                                                                                                                                                                                                                                                                                                                                                                                                                                                                                                                                                                  | 2               |

| <b>Enzymes</b>                                                                                                 | <b>Sequence Names</b>                                                                                                                                                | <b>Number of genes</b> |
|----------------------------------------------------------------------------------------------------------------|----------------------------------------------------------------------------------------------------------------------------------------------------------------------|------------------------|
| (protein) hydrolase                                                                                            |                                                                                                                                                                      |                        |
| 3.1.4.12: sphingomyelin phosphodiesterase; neutral sphingomyelinase                                            | g19104.t1                                                                                                                                                            | 1                      |
| 3.2.1.18: exo-alpha-sialidase; neuraminidase; sialidase; alpha-neuraminidase; acetylneuraminidase              | g5968.t1                                                                                                                                                             | 1                      |
| 3.2.1.20: alpha-glucosidase; maltase; glucoinvertase; glucosidosucrase; maltase-glucoamylase; alpha-glucofuran | g2087.t1, g6007.t1, g6007.t1, g5639.t1, g11886.t1                                                                                                                    | 5                      |
| 3.2.1.22: alpha-galactosidase; melibiase; alpha-D-galactosidase; alpha-galactosidase A;                        | g17703.t1, g18976.t1, g7708.t1, g13397.t1, g734.t1, g4888.t1, g13397.t1, g734.t1, g4888.t1, g10638.t1                                                                | 10                     |
| 3.2.1.23: beta-galactosidase; lactase (ambiguous); beta-lactosidase; maxilact; hydrolact; beta-D-lactosidase;  | g13920.t1, g14384.t1, g19713.t1, g2617.t1, g18481.t1, g5023.t1, g5876.t1, g925.t1, g217.t1, g3387.t1, g18612.t1, g10627.t1, g10940.t1, g4271.t1, g12380.t1           | 15                     |
| 3.2.1.24: alpha-mannosidase; alpha-D-mannosidase; p-nitrophenyl-alpha-mannosidase; alpha-D-mannopyranosidase;  | g16103.t1, g13332.t1                                                                                                                                                 | 2                      |
| 3.2.1.31: beta-glucuronidase; beta-glucuronide glucuronohydrolase glucuronidase;                               | g242.t1                                                                                                                                                              | 1                      |
| 3.2.1.45: glucosylceramidase; psychosine hydrolase; glucosylsphingosine glucosylhydrolase;                     | g17141.t1                                                                                                                                                            | 1                      |
| 3.2.1.49: alpha-N-acetylgalactosaminidase; alpha-acetylgalactosaminidase;                                      | g11079.t1, g4168.t1, g10638.t1                                                                                                                                       | 3                      |
| 3.2.1.52: beta-N-acetylhexosaminidase; hexosaminidase;                                                         | g7925.t1, g8511.t1                                                                                                                                                   | 2                      |
| 3.4.14.1: dipeptidyl-peptidase I; cathepsin C; dipeptidyl aminopeptidase I; dipeptidyl transferase; cathepsin  | g11345.t1, g16487.t1, g1667.t1, g227.t1, g3896.t1, g4039.t1, g7229.t1, g885.t1, g9958.t1                                                                             | 9                      |
| 3.4.16.5: carboxypeptidase C; carboxypeptidase Y; serine carboxypeptidase I; cathepsin A;                      | g10021.t1, g10282.t1                                                                                                                                                 | 2                      |
| 3.4.18.1: cathepsin X; cathepsin B2; cysteine-type carboxypeptidase; cathepsin IV; cathepsin Z;                | g10940.t1, g11428.t1, g16871.t1                                                                                                                                      | 3                      |
| 3.4.22.-: Cysteine endopeptidase                                                                               | g4523.t1, g13912.t1, g17440.t1, g12181.t1, g9921.t1, g18485.t1, g16485.t1, g7835.t1, g5682.t1, g15805.t1, g1693.t1, g99.t1, g9451.t1, g19487.t1, g6951.t1, g18039.t1 | 16                     |
| 3.4.22.1: cathepsin B; cathepsin B1 (obsolete); cathepsin II cathepsin L;                                      | g12788.t1                                                                                                                                                            | 1                      |
| Aspartic endopeptidases                                                                                        | g7922.t1, g9536.t1, g1812.t1,                                                                                                                                        | 42                     |



| Enzymes                                                                                                   | Sequence Names                                                                                                                                                                                                                                                                                                                                                                                                                                                                                                                                                           | Number of genes |
|-----------------------------------------------------------------------------------------------------------|--------------------------------------------------------------------------------------------------------------------------------------------------------------------------------------------------------------------------------------------------------------------------------------------------------------------------------------------------------------------------------------------------------------------------------------------------------------------------------------------------------------------------------------------------------------------------|-----------------|
| 3.4.23.5: cathepsin D                                                                                     | g11075.t1, g16276.t1, g10.t1, g11270.t1, g18475.t1, g2390.t1, g18959.t1, g11581.t1, g9770.t1, g5644.t1, g19251.t1, g1067.t1, g17256.t1, g15070.t1, g2824.t1, g3268.t1, g2624.t1, g17398.t1, g3598.t1, g14587.t1, g14586.t1, g558.t1, g12166.t1, g17079.t1, g8877.t1, g2753.t1, g13728.t1, g3919.t1, g17512.t1, g13078.t1, g6019.t1, g19884.t1, g10152.t1, g11540.t1, g17955.t1, g14137.t1, g4304.t1, g16180.t1, g6812.t1, g11717.t1, g11718.t1, g1446.t1, g14621.t1, g17420.t1, g18498.t1, g2894.t1, g4451.t1, g4481.t1, g5120.t1, g6224.t1, g7260.t1, g797.t1, g9042.t1 | 14              |
| 3.5.1.23: ceramidase; acylsphingosine deacylase;                                                          | g14304.t1                                                                                                                                                                                                                                                                                                                                                                                                                                                                                                                                                                | 1               |
| 3.6.1.6: nucleoside diphosphate phosphatase;                                                              | g8837.t1, g9293.t1                                                                                                                                                                                                                                                                                                                                                                                                                                                                                                                                                       | 2               |
| <b>Enzymes related to peroxisome processes</b>                                                            |                                                                                                                                                                                                                                                                                                                                                                                                                                                                                                                                                                          |                 |
| 1.1.1.35: 3-hydroxyacyl-CoA dehydrogenase; beta-hydroxyacyl dehydrogenase;                                | g10565.t1, g6421.t1                                                                                                                                                                                                                                                                                                                                                                                                                                                                                                                                                      | 2               |
| 1.1.1.42: isocitrate dehydrogenase (NADP+);                                                               | g19124.t1, g629.t1, g7997.t1, g9270.t1                                                                                                                                                                                                                                                                                                                                                                                                                                                                                                                                   | 4               |
| 1.1.3.15: (S)-2-hydroxy-acid oxidase;                                                                     | g3321.t1                                                                                                                                                                                                                                                                                                                                                                                                                                                                                                                                                                 | 1               |
| 1.11.1.15: peroxiredoxin; thioredoxin peroxidase; tryparedoxin peroxidase                                 | g16286.t1, g4347.t1, g9074.t1, g711.t1, g10793.t1, g4348.t1                                                                                                                                                                                                                                                                                                                                                                                                                                                                                                              | 6               |
| 1.15.1.1: superoxide dismutase; superoxidase dismutase; copper-zinc superoxide dismutase;                 | g1299.t1, g1327.t1, g18085.t1, g15343.t1, g12437.t1, g14067.t1                                                                                                                                                                                                                                                                                                                                                                                                                                                                                                           | 6               |
| 1.17.1.4: xanthine dehydrogenase                                                                          | g11271.t1, g8501.t1                                                                                                                                                                                                                                                                                                                                                                                                                                                                                                                                                      | 2               |
| 1.17.3.2: xanthine oxidase;                                                                               | g11271.t1, g8501.t1                                                                                                                                                                                                                                                                                                                                                                                                                                                                                                                                                      | 2               |
| 1.3.3.6: acyl-CoA oxidase; fatty acyl-CoA oxidase; acyl coenzyme A oxidase; fatty acyl-coenzyme A oxidase | g15580.t1, g8950.t1, g8951.t1, g8952.t1, g1484.t1, g4622.t1, g17278.t1, g2229.t1                                                                                                                                                                                                                                                                                                                                                                                                                                                                                         | 8               |
| 2.3.1.16: acetyl-CoA C-acyltransferase; beta-ketothiolase; 3-ketoacyl-CoA thiolase;                       | g20084.t1, g12162.t1, g3411.t1, g9558.t1                                                                                                                                                                                                                                                                                                                                                                                                                                                                                                                                 | 4               |
| 2.3.1.176: propanoyl-CoA C-acyltransferase                                                                | g11613.t1, g6813.t1                                                                                                                                                                                                                                                                                                                                                                                                                                                                                                                                                      | 2               |
| 2.3.1.42: glycerone-phosphate O-acyltransferase                                                           | g7214.t1, g7215.t1, g5105.t1, g5318.t1                                                                                                                                                                                                                                                                                                                                                                                                                                                                                                                                   | 4               |
| 2.5.1.18: glutathione transferase; glutathione S-transferase; glutathione S-alkyltransferase;             | g11239.t1, g15471.t1, g16768.t1, g55.t1, g8864.t1, g18240.t1, g2249.t1, g622.t1, g11856.t1, g15155.t1, g15115.t1, g7321.t1                                                                                                                                                                                                                                                                                                                                                                                                                                               | 12              |
| 2.6.1.44: alanine---glyoxylate transaminase; AGT; alanine-glyoxylate aminotransferase                     | g11401.t1, g16262.t1, g7370.t1, g3045.t1, g9503.t1, g12516.t1                                                                                                                                                                                                                                                                                                                                                                                                                                                                                                            | 6               |

| <b>Enzymes</b>                                                                        | <b>Sequence Names</b>                                                                                                                                                                                                                                                                                                                                                                                                                                                                                                                                                                                                                                                                                                                                                                                                                                                                                                                                                                                                                                                                                                                                                                    | <b>Number of genes</b> |
|---------------------------------------------------------------------------------------|------------------------------------------------------------------------------------------------------------------------------------------------------------------------------------------------------------------------------------------------------------------------------------------------------------------------------------------------------------------------------------------------------------------------------------------------------------------------------------------------------------------------------------------------------------------------------------------------------------------------------------------------------------------------------------------------------------------------------------------------------------------------------------------------------------------------------------------------------------------------------------------------------------------------------------------------------------------------------------------------------------------------------------------------------------------------------------------------------------------------------------------------------------------------------------------|------------------------|
| 2.6.1.45: serine---glyoxylate transaminase                                            | g11401.t1, g16262.t1, g7370.t1                                                                                                                                                                                                                                                                                                                                                                                                                                                                                                                                                                                                                                                                                                                                                                                                                                                                                                                                                                                                                                                                                                                                                           | 3                      |
| 2.6.1.51: serine---pyruvate transaminase; SPT; hydroxypyruvate:L-alanine transaminase | g11401.t1, g16262.t1, g7370.t1, g3045.t1, g9503.t1, g12516.t1                                                                                                                                                                                                                                                                                                                                                                                                                                                                                                                                                                                                                                                                                                                                                                                                                                                                                                                                                                                                                                                                                                                            | 6                      |
| 3.1.2.27: choloyl-CoA hydrolase; PTE-2 (ambiguous)                                    | g3273.t1                                                                                                                                                                                                                                                                                                                                                                                                                                                                                                                                                                                                                                                                                                                                                                                                                                                                                                                                                                                                                                                                                                                                                                                 | 1                      |
| 3.3.2.10: soluble epoxide hydrolase;                                                  | g19945.t1, g13358.t1, g13357.t1                                                                                                                                                                                                                                                                                                                                                                                                                                                                                                                                                                                                                                                                                                                                                                                                                                                                                                                                                                                                                                                                                                                                                          | 3                      |
| <b>Regulation of autophagy</b>                                                        |                                                                                                                                                                                                                                                                                                                                                                                                                                                                                                                                                                                                                                                                                                                                                                                                                                                                                                                                                                                                                                                                                                                                                                                          |                        |
| 2.7.1.137: phosphatidylinositol 3-kinase; 1-phosphatidylinositol 3-kinase;            | g2465.t1, g17818.t1                                                                                                                                                                                                                                                                                                                                                                                                                                                                                                                                                                                                                                                                                                                                                                                                                                                                                                                                                                                                                                                                                                                                                                      | 2                      |
| 2.7.11.1: non-specific serine/threonine protein kinase; A-kinase; AP50 kinase;        | g2362.t1, g10597.t1, g10995.t1, g13038.t1, g20486.t1, g4043.t1, g5893.t1, g6167.t1, g322.t1, g4534.t1, g1784.t1, g6500.t1, g5866.t1, g3166.t1, g4270.t1, g4985.t1, g696.t1, g17104.t1, g17187.t1, g371.t1, g372.t1, g373.t1, g1159.t1, g12987.t1, g1274.t1, g18711.t1, g4025.t1, g506.t1, g6417.t1, g3165.t1, g15943.t1, g11099.t1, g11236.t1, g11695.t1, g13189.t1, g13460.t1, g1390.t1, g14361.t1, g1550.t1, g15640.t1, g15947.t1, g16108.t1, g16163.t1, g16537.t1, g16539.t1, g16960.t1, g17182.t1, g17443.t1, g17606.t1, g18614.t1, g209.t1, g2963.t1, g3021.t1, g3612.t1, g4193.t1, g4418.t1, g7241.t1, g7325.t1, g8971.t1, g9469.t1, g5788.t1, g7957.t1, g15051.t1, g2345.t1, g8885.t1, g3132.t1, g345.t1, g13236.t1, g9558.t1, g4052.t1, g3061.t1, g8175.t1, g3729.t1, g16718.t1, g6813.t1, g9188.t1, g508.t1, g6778.t1, g946.t1, g19076.t1, g407.t1, g1820.t1, g13459.t1, g12310.t1, g5604.t1, g3884.t1, g3885.t1, g4231.t1, g977.t1, g13687.t1, g10360.t1, g12557.t1, g12643.t1, g12715.t1, g14336.t1, g16064.t1, g16093.t1, g265.t1, g7329.t1, g1776.t1, g4243.t1, g11652.t1, g14581.t1, g14695.t1, g1598.t1, g16013.t1, g16051.t1, g17025.t1, g17759.t1, g1796.t1, g18025.t1, | 129                    |

| Enzymes                                                                 | Sequence Names                                                                                                                                                                                                                                                                                                                                                                                                                                                                                                                                                                                                                                                                                                                                                                                                                                                                                                                                         | Number of genes |
|-------------------------------------------------------------------------|--------------------------------------------------------------------------------------------------------------------------------------------------------------------------------------------------------------------------------------------------------------------------------------------------------------------------------------------------------------------------------------------------------------------------------------------------------------------------------------------------------------------------------------------------------------------------------------------------------------------------------------------------------------------------------------------------------------------------------------------------------------------------------------------------------------------------------------------------------------------------------------------------------------------------------------------------------|-----------------|
| 2.7.11.11: cAMP-dependent protein kinase; PKA; PKA C; protein kinase A; | g18242.t1, g2519.t1, g4652.t1, g7049.t1, g7561.t1, g9302.t1, g2757.t1, g4834.t1, g7442.t1, g7486.t1, g14978.t1, g16770.t1, g16870.t1, g5051.t1, g7837.t1, g1454.t1, g1922.t1, g5080.t1, g11856.t1, g13225.t1, g15155.t1, g16731.t1, g16732.t1, g17196.t1, g17486.t1, g17487.t1, g17488.t1, g18254.t1, g3103.t1, g3686.t1, g539.t1, g6035.t1, g622.t1, g6739.t1, g12081.t1, g12523.t1, g19575.t1, g3411.t1, g3993.t1, g6553.t1, g7242.t1, g3400.t1, g5857.t1, g16455.t1, g3613.t1, g12834.t1, g12808.t1, g2395.t1, g17122.t1, g3862.t1                                                                                                                                                                                                                                                                                                                                                                                                                  | 32              |
| 6.3.2.19: ubiquitin---protein ligase; ubiquitin-activating enzyme       | g13350.t1, g324.t1, g9376.t1, g12917.t1, g8263.t1, g15902.t1, g5100.t1, g17183.t1, g3340.t1, g3575.t1, g11395.t1, g20628.t1, g4994.t1, g6060.t1, g9284.t1, g149.t1, g5149.t1, g14073.t1, g5071.t1, g3267.t1, g9208.t1, g1990.t1, g8759.t1, g4515.t1, g9401.t1, g7149.t1, g1054.t1, g11794.t1, g10838.t1, g11063.t1, g13643.t1, g2579.t1, g6216.t1, g13004.t1, g18583.t1, g116.t1, g10400.t1, g8850.t1, g12048.t1, g4607.t1, g5302.t1, g9820.t1, g3882.t1, g10181.t1, g12066.t1, g8023.t1, g7983.t1, g8895.t1, g147.t1, g9219.t1, g12171.t1, g619.t1, g1055.t1, g7512.t1, g3647.t1, g8702.t1, g16504.t1, g11097.t1, g3065.t1, g6782.t1, g1528.t1, g7830.t1, g14590.t1, g148.t1, g12116.t1, g18155.t1, g2297.t1, g9108.t1, g396.t1, g4071.t1, g1943.t1, g7580.t1, g4339.t1, g15379.t1, g16395.t1, g579.t1, g6105.t1, g13351.t1, g1969.t1, g460.t1, g9218.t1, g981.t1, g15246.t1, g9105.t1, g5749.t1, g8471.t1, g8215.t1, g8006.t1, g19210.t1, g11462.t1, | 110             |

| <b>Enzymes</b> | <b>Sequence Names</b>                                                                                                                                                                                                           | <b>Number of genes</b> |
|----------------|---------------------------------------------------------------------------------------------------------------------------------------------------------------------------------------------------------------------------------|------------------------|
|                | g18992.t1, g10056.t1, g3654.t1,<br>g18763.t1, g4388.t1, g19807.t1,<br>g5841.t1, g5840.t1, g2539.t1,<br>g11376.t1, g1708.t1, g5859.t1,<br>g12901.t1, g185.t1, g6108.t1,<br>g3614.t1, g13199.t1, g19951.t1,<br>g11723.t1, g647.t1 |                        |

**Table S6. Mitochondrion respiration assay.** Respiration analysis of live dinospores in concentrations from  $2-3 \times 10^4$  cells/ml. Respiration analysis was carried out in pure filtered medium, without any additional substrates. In addition, we provide cell respiration data from other systems for comparison.

| System                                         | Temperature<br>[°C] | MO <sub>2</sub><br>[nmol O <sub>2</sub> *10 <sup>4</sup> cells <sup>-1</sup> *min <sup>-1</sup> ] |        |        |                    | Study                                                                                                                                |
|------------------------------------------------|---------------------|---------------------------------------------------------------------------------------------------|--------|--------|--------------------|--------------------------------------------------------------------------------------------------------------------------------------|
|                                                |                     | Run 1                                                                                             | Run 2  | Run 3  | Mean ±<br>SEM      |                                                                                                                                      |
| Dinospores                                     | 15                  | 0.0140                                                                                            | 0.0128 | 0.0164 | 0.0144 ±<br>0.0018 | This Study                                                                                                                           |
| <i>Gymnodinium nelsoni</i> (clone GSBL)        | 21                  |                                                                                                   |        |        | 0.21-0.65          | P. W. Hochachka, J. M. Teal, The Biological Bulletin 126, 274-281 (1964).                                                            |
| Human endothelial cell culture                 | 37                  |                                                                                                   |        |        | 0.012              | E. Gnaiger, R. Steinlechner-Maran, G. Méndez, T. Eberl, R. Margreiter, Journal of bioenergetics and biomembranes 27, 583-596 (1995). |
| <i>Crassostrea gigas</i> , Isolated Gill cells | 15                  |                                                                                                   |        |        | 0.004              | G. Lannig, S. Eilers, H. O. Pörtner, I. M. Sokolova, C. Bock, Marine drugs 8, 2318-2339 (2010).                                      |
| Antarctic fish hepatocytes                     | 12                  |                                                                                                   |        |        | 0.004              | F. C. Mark, T. Hirse, H.-O. Pörtner, Polar biology 28, 805-814 (2005).                                                               |

**Table S7. The search for components of the electron transport system of *A. ceratii*.** The search was sequential from top to bottom of the table. Sequences identified not to be *A. ceratii* derived were removed from further searches. Mitochondrial sequences from *Plasmodium falciparum*, *Alexandrium tamarense*, *Oxyrrhis marina*, *Tetrahymena thermophila*, *Hematodinium*, and *Perkinsus marinus* were used for Blast searches.

| <b>Search criteria</b>                                                        | <b>Method</b> | <b>target</b>                                  | <b>Found</b>                                                                                      |
|-------------------------------------------------------------------------------|---------------|------------------------------------------------|---------------------------------------------------------------------------------------------------|
| Known Dinoflagellate mitochondrial genomes                                    | blastn        | genome assembly                                | Host mitogenome fragments ( <i>Alexandrium</i> ) of <i>cox1</i> and <i>cytb</i>                   |
| Mitochondrial genomes of Apicomplexa and Dinoflagellata                       | blastx        | predicted proteins from genome assembly        | 48 kb mitochondrial genome of a chrysophyte; 2 matches to nuclear genome parts of <i>cox1</i> ... |
| Mitochondrial genomes of Apicomplexa and Dinoflagellata                       | blastx        | predicted proteins from transcriptome assembly | <i>cox1</i> fragments                                                                             |
| Functional annotation                                                         | KEGG/KAAS     | genome assembly                                | identification of oxidative phosphorylation components (see Fig. 5 and S7)                        |
| Potential mitochondrial sequences from other <i>A. ceratii</i> genome strains | BWA*          | raw reads                                      | No matches                                                                                        |

\*Burrows-Wheeler Aligner

**Table S8. Mitochondrial functions encoded in the genome of *A. ceratii*.** We searched the whole genome for presence of components of the respiratory chain using BLAST with known components from *Tetrahymena thermophila*. Furthermore, pfam domain structures were detected with InterProScan (<http://www.ebi.ac.uk/interpro/interproscan.html>), and finally, the whole predicted gene set was submitted to the KAAS annotation server. The table lists all identified components of the respiratory chain in *A. ceratii*. All components of Complex I and III are missing.

| Scaffold ID                                 | Position       | KEGG ID | Name    | Protein ID |
|---------------------------------------------|----------------|---------|---------|------------|
| Complex components                          |                |         |         |            |
| Succinate dehydrogenase (complex 2)         |                |         |         |            |
| scaffold294_size101967                      | 179..3514      | K00234  | SDHA    | g6898.t1   |
| scaffold87_size276801                       | 53643..55411   | K00235  | SDHB    | g2130.t1   |
| cytochrome c oxidase (complex 4)            |                |         |         |            |
| scaffold432_size187470                      | 185280..186478 | K02257  | COX10   | g9344.t1   |
| scaffold1091_size62708                      | 1..700         | K02256  | COX1    | g15932.t1  |
| scaffold46_size328227                       | 41768..42440   | K02256  | COX1    | g833.t1    |
| scaffold161_size93542                       | 33982..34842   | K02261  | COX2    | g4166.t1   |
| scaffold82_size396561                       | 164857..171534 | K02265  | COX5B   | g1954.t1   |
| scaffold919_size47424                       | 31843..33387   | K02267  | COX6B   | g14662.t1  |
| scaffold137_size61657                       | 11329..12202   | K02258  | COX11   | g3584.t1   |
| scaffold516_size65844                       | 39254..41893   | K02259  | COX15   | g10549.t1  |
| ATPase (complex 5)                          |                |         |         |            |
| scaffold106_size145008                      | 102075..103026 | K02137  | ATPeF0O | g2780.t1   |
| scaffold52_size130106                       | 21982..22614   | K02128  | ATPeF0C | g1027.t1   |
| scaffold481_size177949                      | 92371..95061   | K02132  | ATPeF1A | g10076.t1  |
| scaffold1109_size67627                      | 27142.. 28910  | K02133  | ATPeF1B | g16059.t1  |
| scaffold792_size49622                       | 46482..48426   | K02134  | ATPeF1D | g13480.t1  |
| scaffold528_size76787                       | 14694..15944   | K02136  | ATPeF1G | g10622     |
| Additional identified components as in (31) |                |         |         |            |
| Alternative NAD(P)H dehydrogenase           |                |         |         |            |
| scaffold17_size333242                       | 300947..303618 |         |         | g180.t1    |
| Cytochrome b2                               |                |         |         |            |
| scaffold126_size117765                      | 68257..69291   |         |         | g3321.t1   |
| Glycerol-3-phosphate dehydrogenase          |                |         |         |            |
| scaffold809_size125823                      | 113948..115819 |         |         | g13621.t1  |
| Dihydroorotate dehydrogenase                |                |         |         |            |
| scaffold268_size171261                      | 54808..55797   |         |         | g6389.t1   |

**Table S9. Primers used in this study to amplify *cox* from *A. ceratii* cDNA.** Primer sequences marked with (\*) were obtained from (33) and the others were designed during this study.

| Name                          | Primer sequence (5'-3')         | Target/position |
|-------------------------------|---------------------------------|-----------------|
| Dinocox1Fa*                   | AAAAATTGTAATCATAAACGCTTAGG      | cox1 forward    |
| Dinocox1F2b*                  | GAATTATATCTCCTGAAAACCAGAACTTC   | cox1 forward    |
| Dinocox1F3b*                  | TTATGATCTTCTTYTTWRTWATGCC       | cox1 forward    |
| Dinocox1Rb*                   | TGTTGAGCCACCTATAGTAAACATTA      | cox1 reverse    |
| Dinocox1R2b*                  | AGTTATTCCTGATCCAATAGATGACAG     | cox1 reverse    |
| Dinocox1R3b*                  | CTGATCCAATAGATGACAGAAAATTCC     | cox1 reverse    |
| Dinocob1Fa*                   | ATGAAATCTCATTTACAWWCATATCCTTGTC | cob forward     |
| Dinocob2Fb*                   | ATWAATTYTTTTYTGGAAHTHBGGTTT     | cob forward     |
| Dinocob1Ra*                   | TCTCTTGAGGKAATTGWKMACCTATCCA    | cob reverse     |
| Dinocob2Rb*                   | CGAGCATAAGATAKAAACWTCTCTTGAGG   | cob reverse     |
| Cox1 gene fragment 1 (g15932) |                                 |                 |
| G15932_Set1_F                 | ACGCAGCAGATACGGTCTTT            | 37              |
| G15932_Set1_R                 | CAGTGATGAACAAGGCTCCA            | 471             |
| G15932_Set2_F                 | TGACTTCGCTTCCAGAGGTT            | 200             |
| G15932_Set2_R                 | TGCCGAACACAATTACCTCA            | 839             |
| G15932_Set3_F                 | GAGTCCGTCTCCGTGAAGAG            | 732             |
| G15932_Set3_R                 | TGGTACTGCACGAGGAACTG            | 1555            |
| Cox1 gene fragment 2 (g833)   |                                 |                 |
| G833_set1_F                   | CGGCGGCAGTATTAGATT              | 1035            |
| G833_set1_R                   | TCCTCGTCTTGCTCTTGT              | 147             |
| G833_set2_F                   | CAACAGCTGCGACTACTCC             | 572             |
| G833_set2_R                   | TTCGAAGCTCCACCAACA              | 1197            |



**Table S10. Primers used to amplify various shikimate pathway transcripts from *A. ceratii* cDNA.**

| Name        | Primer sequence (5'-3') | Target                         |
|-------------|-------------------------|--------------------------------|
| g6770       |                         |                                |
| aroC_gen1_F | CTTTGACCGAGCAGGATA      | chorismate synthase (aroC)     |
| aroC_gen1_R | ATGTTTTTCGCCCGCTGTA     | chorismate synthase (aroC)     |
| aroB_gen2_F | CAGTACAGCGGGCGAAAA      | chorismate synthase (aroB)     |
| aroB_gen2_R | ATCTTCGTCTTGAACACACT    | chorismate synthase (aroB)     |
| aroA_gen3_F | ACACTATGCTTTCCACAA      | EPSP synthase (aroA)           |
| aroA_gen3_R | GTGCCCCGAAGTTCAAAT      | EPSP synthase (aroA)           |
| aroK_gen4_F | ATTTTGAACTTCGGGCAC      | shikimate kinase (aroK)        |
| aroK_gen4_R | ACCAGCCCTCCTTCTCTA      | shikimate kinase (aroK)        |
| aroD_gen5_F | TAGAGAAGGAGGGCTGGT      | shikimate dehydrogenase (aroD) |
| aroD_gen5_R | ATTATGTCTGAAGATCCCGT    | shikimate dehydrogenase (aroD) |
| aroE_gen6_F | AGATGAACGCCGGAAAAA      | shikimate dehydrogenase (aroE) |
| aroE_gen6_R | AAAACCTGCTCCTTCAAC      | shikimate dehydrogenase (aroE) |
| g13589      |                         |                                |
| aroG_gen7_F | CGCAAAGAGTGGAAAGAG      | chorismate binding DAHP (aroG) |
| aroG_gen7_R | AACCGAATCCTTCCACAC      | chorismate binding DAHP (aroG) |
